# Supplementary material for: Identification of new branch points and unconventional introns in Saccharomyces cerevisiae
Source: PubMed Central journal article supplement — RNA. 2016 Oct;22(10):1522–34. doi: 10.1261/rna.057216.116 (PMC5029451; doi:10.1261/rna.057216.116), 2016-10
Supplement: supp_057216.116_Supplemental_Methods.pdf [file supp_057216.116_Supplemental_Methods.pdf]

## Supplementary Methods

### Meiosis time courses

Meiotic time courses were performed as described by Berchowitz *et al* (Berchowitz *et al.* 2013). Briefly, SK1 yeast cells were grown to saturation in YPD, diluted in BYTA medium to an  $OD_{600} = 0.25$ , and grown for 20 hours to reach a G1 phase state. These cells were washed once with water, then resuspended in sporulation medium to an  $OD_{600} = 1.9$ . Cells were allowed to proceed through meiosis for 6 hours at 30°C. During this time, cells accumulated at a meiotic prophase arrest due to the *NDT80* transcription factor being under an inducible promoter (Benjamin *et al.* 2003). After harvesting samples for the 6-hour time point, cells were released from the prophase arrest by the induction of *NDT80* with 1 $\mu$ M  $\beta$ -estradiol, allowing synchronous progression through the meiotic divisions (Carlile and Amon 2008). RNA and immunofluorescence samples were harvested in parallel at the indicated time points. For the RNA samples, 2mL of cells were pelleted, flash frozen in liquid nitrogen, and stored at -80°C until further processing. Tubulin immunofluorescence was performed as described by Berchowitz *et al.* We also observe in the *dbr1 $\Delta$*  strain, introns that are abundant in the rRNA subtraction are depleted in the poly(A) selection, explaining discrepancies between these samples in the clustering since reads inside the intron specifically identify the retained intron isoform instead of the spliced isoform.

### RNA isolation

RNA isolation for Lariat-seq and Branch-seq was performed as follows. Yeast were grown to  $OD_{600}$  0.94-0.98 and were collected by centrifugation at 7000 RPM for 5 min at 4°C. Media was poured off and yeast were washed twice in water and frozen at -80°C. Cells were thawed and transferred to tubes containing 2.8mm ceramic beads and 1mL Trizol (Life Technologies) was added to 1/10 cell pellet. An Omni Bead Ruptor was used to lyse the cells, twice for 20 seconds on ½ max speed and once for 10 seconds on max speed. Samples were incubated at room temp for 5 min, 1/5 volume of chloroform was added and

mixed, samples incubated at room temp 2-3 min and were spun at max speed for 15 min at 4°C. The upper aqueous layer was transferred to a new tube and precipitated with ½ volume isopropanol. After 5min on ice, samples were spun at max speed, 4°C for 25 min. The RNA pellet was washed with 70% ethanol before storage at -80°C.

RNA isolation for RNA-seq was performed as follows. Overnight yeast cultures were grown in 5mL YPD media and were diluted in the morning into 50mL YPD and grown to log phase ( $OD_{600}$  0.5 to 1), spun down, and the pellets were frozen in liquid nitrogen. RNA was isolated as in (Clarkson et al. 2010). Pellets were resuspended in 1mL Acid Phenol and an equal volume of AES buffer (50mM NaAcetate pH 5.2, 10mM EDTA, 1% SDS) was added. In 2mL Eppendorf tubes, samples were incubated at 65°C for 10 min with vortexing every minute. Samples were incubated on ice for 5 min and then transferred to a phaselock tube and one volume chloroform was added. After spinning, the top aqueous layer was transferred to a fresh phaselock tube and one volume of phenol:chloroform:isoamyl alcohol (25:24:1) was added, tubes were spun, one volume of chloroform was added, tubes were spun, and the aqueous layer was transferred to a fresh tube to be precipitated with 50uL 3M NaOAc (pH 5.5) and 550uL isopropanol. Samples were spun at max speed for 25 minutes at 4°C. The pellet was washed twice with 70% ethanol and resuspended in water.

### **Isolation of in vitro-spliced *Drosophila melanogaster* lariat RNA**

Radio labeled *FTZ* lariat RNA was used to assess the fidelity of each step of the Branch-seq protocol during protocol development. The *FTZ* lariat RNA was included as a positive control spike-in during all subsequent Branch-seq experiments to ensure successful debranching. *FTZ* lariat RNA was generated using Hela nuclear extracts for in-vitro splicing. Hela nuclear extracts were a kind gift from the Reed Lab (Folco et al. 2012). Coupled in vitro transcription and splicing were performed similar to Folco and Reed (Folco and Reed 2014) except without addition of  $\alpha$ -amanitin to obtain as many lariats as possible. Reactions were digested with RNase R (Epicenter) at 37°C for 1 hour to obtain radio labeled *FTZ* lariats.

### **Debranching enzyme purification**

*S. cer. DBR1* cDNA was generated from WT S288C yeast and cloned into the pET151 expression vector from Invitrogen. Protein was expressed in Rosetta 2(DE3)pLysS competent cells grown in YT media at 37°C until they were induced with IPTG and grown at 18°C. Bacteria were lysed using Native Lysis Buffer (Qiagen). Protein was purified with a Ni-NTA column (Qiagen) and subsequently over an S200 column (Buffer: 125 mM KCL, 20mM HEPES pH 7.3, 1mM DTT, 10% glycerol). Protein was concentrated (final 50% glycerol) and flash frozen. Protein was tested for RNase activity and debranching activity on linear RNA and an in vitro spliced lariat, respectively.

### **Reverse transcription**

Reverse transcription was performed using primer /5Phos/AGATCGGAAGAGCGTCGTGTAGGGAAAG/iSp18/CACTCA/iSp18/GTGACTGGAGTTC CTTGGCACCCGAGAATTCCA/TTTTTTTTTTTTTTTTTTTTTTTVN (designed in collaboration with Yarden Katz (Katz et al. 2014)) incubated with SuperScriptIII RT (Invitrogen) for 30 min at 48°C. Subsequently 2.1 uL of 1M NaOH was added and samples were incubated at 98°C for 15 min. The RT primer is a modified version of the ribosome footprint profiling RT primer where the 5' end of the RNA gets sequenced first and paired end, barcoded sequencing is possible (Ingolia et al. 2009).

The samples were then run on a 6% TBE-urea gels (Invitrogen) for 93 min at 200V to remove excess RT primer. Gels were stained with SYBR gold and gel slices were excised where product was observed to run above the RT primer for the top, middle, and bottom lariat samples. Gel slices were shredded and DNA was eluted in 400uL PAGE elution buffer overnight (see 2D gels Methods). Gel was removed before precipitation using a Nanosep column.

### **Circularization**

Circligase (Epicentre) was used to circularize the gel isolated RT products for 1 hour at 60°C and the enzyme was inactivated by heating at 80°C for 10 minutes.

### **PCR**

Phusion high-fidelity polymerase (NEB) was used to amplify the circularized products. Illumina PCR primer 1.0

AATGATACGGCGACCACCGAGATCTACACTCTTTCCCTACACGACGCTCTTCCGATCT

was paired with Illumina barcode primers (RPI#s)

(RPI1) CAAGCAGAAGACGGCATAACGAGATCGTGATGTGACTGGAGTTCCTTGGCACCCGAGAATTCCA

(RPI2) CAAGCAGAAGACGGCATAACGAGATACATCGGTGACTGGAGTTCCTTGGCACCCGAGAATTCCA

(RPI3) CAAGCAGAAGACGGCATAACGAGATGCTAAGTGACTGGAGTTCCTTGGCACCCGAGAATTCCA

(RPI4) CAAGCAGAAGACGGCATAACGAGATTGGTCAAGTGACTGGAGTTCCTTGGCACCCGAGAATTCCA

Samples were removed after 6, 8, 10 and 12 PCR cycles and run on an 8% TBE gel (Invitrogen) for 40 min at 200V. PCR products were gel isolated by shredding the gel through a hole poked with a needle in the bottom of a 0.5 mL Eppendorf tube and eluted in 400uL PAGE elution buffer (see above) at 65°C, shaking at 1400RPM for one hour. Gel was removed with a Nanosep column and precipitated with isopropanol.

Oligonucleotide sequences © 2006-2008 Illumina, Inc. All rights reserved.

[http://epigenome.usc.edu/docs/resources/core\\_protocols/Illumina%20Sequence%20Information%20for%20Customers%20DEC2008.pdf](http://epigenome.usc.edu/docs/resources/core_protocols/Illumina%20Sequence%20Information%20for%20Customers%20DEC2008.pdf)

## Sequencing

For Branch-seq, one Illumina MiSeq flow cell was sequenced at the MIT Bio Micro Center (November 2011). 5' end reads were 50 bases and 3' end reads were 250 bases. 3' end reads were sequenced with custom sequencing primer

GTGACTGGAGTTCCTTGGCACCCGAGAATTCATTTTTTTTTTTTTTTTTTTT to avoid

sequencing the untemplated As added by the poly(A) tailing reaction. The 3' end sequencing primer was gel purified prior to use in sequencing (primer design might need to be changed for sequencing on other Illumina machines).

## Lariat-seq library prep

Reverse transcription was performed on 2D gel isolated lariat RNA using 1ul Random hexamer Primers (3ug/ul) (Invitrogen) and SuperScript III reverse transcriptase (Invitrogen). RNA and primer mix was heated at 70°C for 10 minutes and then put on ice.

12 uL of Mix A (mix A: 4uL 5x 1st strand buffer, 2uL 100mM DTT, 1uL dNTPs (10mM), 4uL Actinomycin D [1mg/1mL], 1uL SuperaseIn (20U/ul)) was added to the RNA and primer. Then 1 uL of SSIII was added and the RT program was run: 25°C 10 minutes, 42°C 50 minutes, 70°C 15 minutes, 4°C hold. Sample volume was brought up to 200uL with water and then samples were phenol chloroform extracted and ethanol precipitated. Second strand synthesis was performed with DNA pol I and dUTP to make strand specific libraries. Next the samples underwent SPRI-TE (end repair, adenylation, adapter ligation, gel purification #1). Subsequently uracil digestion was performed with USER, samples underwent PCR and gel purification before sequencing (1/30 of a HiSeq2000 lane).

### **RNA-seq library prep**

RNA was isolated using the hot acid phenol method (see RNA isolation above) to ensure isolation of high quality RNA. All 6 samples, 2 WT, 2 *dbr1Δ*, 2 *upf1Δ*, had RQN (quality) values of 8.8 or higher as measured on the Advanced Analytical machine. Strand specific libraries were prepared by the MIT Bio Micro Center using the TruSeq™ RNA Sample Prep Kit v2 (RS-122-2101 kit) through cDNA after which LM-PCR was performed using the Beckman Coulter SPRITE system with a 200-400bp size cutoff. Samples were barcoded and all sequenced in one HiSeq2000 lane, 60 X 60 bp.

Ribosomal RNA subtraction for the rapamycin treatment, *dbr1 Δ*, and the meiosis time course samples was performed using the Illumina Ribo-Zero Gold rRNA Removal Kit (Yeast) followed by standard strand-specific library preparation. All 20 samples were sequenced in one NextSeq lane, 75 x 75 bp.

### **Branch-seq read mapping**

Reads were trimmed to 30 by 30 nt and mapped with Bowtie1 (Langmead et al. 2009) (bowtie-1.0.0) using the following parameters: **bowtie -S -m 1 -1 end1reads.fastq -2 end2reads.fastq**. Branch-seq reads for each gel slice were mapped to the genome and then combined using **samtools merge** (samtools-0.1.7a) (Li et al. 2009). Reads were initially mapped to SacCer2 (S288C\_reference\_genome\_R61-1-1\_20080605) and subsequently to SacCer3 (S288C\_reference\_genome\_R64-1-1\_20110203) downloaded from SGD. Peak

calling was performed using the SacCer2 genome and peak calls were converted to SacCer3 coordinates using liftOver tool (<http://genome.ucsc.edu/>) for some analyses. Peaks were called using the combined reads from the top, middle, and bottom sections of the arc. For Figure 1d if there were multiple peaks within 3 nt of the annotated BP, the annotated BP was only counted once.

### **winBP peak calling**

A sliding window approach adapted from Arribere and Gilbert (Juneau et al. 2009; Arribere and Gilbert 2013) was used with some modifications in the winBP peak caller. A 200nt region was taken starting at the 5' end of each chromosome. Average read coverage per nucleotide,  $\alpha$ , for this region was calculated using only BP end (second end) reads and was required to be at least 0.1. A sliding window of 5 nt (196 of these windows/200nt region) within each 200 nt region was used to reduce spurious calls in regions with uneven coverage. If coverage in the 5 nt sliding window was at least  $12\alpha$  a peak was called. At least 1nt was required between reported peaks. Peak calling was performed for each strand, always in the 5' to 3' direction. The 200nt regions were shifted 100 nt down the chromosome, and the steps outlined above were repeated until reaching the end of the chromosome. winBP recovered 58% (153/260) (Table 1) of annotated BPs in expressed genes. GEM-BP peak calling is described in Supplemental Methods.

### **GEM-BP peak calling**

To discover BP events from the data, we extended the ChIP-seq and ChIP-exo peak caller GEM<sup>4</sup> that calls events with high spatial resolution. Unlike other peak callers, GEM does not assume any specific distribution of reads, and therefore is flexible to adapt to a new data type by learning a data-specific empirical spatial read distribution. We used a +/- 10bp window around the confident set of annotated BPs to learn the empirical read distribution (Fig. 1c) and used it for peak calling by GEM. To avoid including noisy reads from the non-BP strand, we modified GEM to perform single-strand peak calling and used only the 3' end (BP end) reads as input. As part of the integrated event finding and motif

discovery process, GEM discovered the consensus BP motif TACTAAC, some variants that are similar to the consensus motifs, and a poly A motif that represents technical artifacts resulting from anchored oligo(dT) RT step of the protocol. To distinguish events associated with different motifs, we modified GEM to use multiple position weight matrix (PWM) motifs as the positional priors for event discovery. If a base position is matched by multiple motifs, GEM chooses the PWM model that has a more significant p-value to set the positional prior. For each called event, GEM computes an event shape score that quantifies the similarity of the event read distribution to the empirical read distribution. The event shape score is defined as the Pearson correlation of read count values across the +/-10bp bases between the called event and the empirical read distribution. The new functionalities of the GEM software, which we called GEM-BP, were implemented in version 2.6. The following parameters were used to analyze the Branch-seq data: `--k 7 --a 2 --q 1 -bp --pp_pwm --not_update_model --nrf --nf`.

We then post-processed the GEM-BP event calls to discover BP events using a Random Forest classifier (Breiman 2001) in the MATLAB software (MathWorks 2012). The features for the Random Forest include GEM-BP event read count, event shape score, and the binary motif categorical variables. We used the GEM-BP calls that overlap with the annotated BPs as the positive training set, and those that overlap with the tRNA genes as the negative training set. The trained Random Forest classifier was then applied to all of the GEM-BP event calls to make the final BP event calls.

In total, GEM-BP discovered 546 BPs (Table 1), including 75% of expressed BPs (196/260) (Table 1) within 3 nt of their annotated locations (Fig. 1d). Of 546 GEM-BP predicted BPs, 47 (8.6%) had more than one mismatch from the BP consensus motif TACTAAC, compared to 74 (21.5%) of the 344 peaks identified by the winBP approach. These numbers indicate that the GEM-BP predictions are more biased toward consensus BP, presumably because of its use of motif information and training on annotated BP, which match the consensus very closely, information which is not used by the winBP approach. Thus, we used the union of predictions made by both peak callers for subsequent analyses.

### **Typical 5'SS filter for putative novel BPs**

GEM-BP and winBP together called numerous unannotated BPs in the yeast genome; the union of their peak calls yielded 430 putative novel BP peaks in all (Table 1). To define a high confidence subset of putative novel BPs, the paired-end sequencing information from Branch-seq was used as a built-in quality control for BP identification. Branch-seq data contains strand-specific read pairs connecting the BPs and 5'SS. Authentic putative novel BP resulting from splicing should be associated with a plausible 5'SS motif at the start of the associated 5' end reads, while any artefactual putative novel BP peaks would not be expected to have such a motif (or only at the background frequency of this motif in the genome).

For each BP, we took all BP end reads (3' end) within 5nt of the BP peak, accounting for strand. We obtained the paired 5'SS read for each BP read in this set and noted the location of the 5'SS read start. We calculated the mode position from all 5'SS read starts for that BP and looked at the 6mer motif at that position and one position 3'. We considered 6mers that matched the yeast 5'SS consensus GTATGT perfectly or with at most one mismatch as 'typical 5'SS motifs', and all others as 'atypical 5'SS motifs'.

Almost all (97%) annotated yeast introns in nuclear genes have typical 5'SS motifs by this definition (Table S3). Of the Branch-seq 3' end peaks that were associated with annotated BP, 76% (149/196) and 90% (138/153) had 5' end peaks at the annotated 5'SS for GEM-BP and winBP, respectively (Table S1). This result indicates that our approach can reliably and comprehensively map both the BP and 5'SS of introns, as intended.

After applying the typical 5'SS filter to the 430 putative novel BP, 268 cnBP remained. This subset of 268 should be treated as highly confident and was used for all downstream analyses. We estimate the FDR for the set of 268 BP is 1.1%, which is the genomic background frequency of 6mers matching typical 5'SS motifs in the yeast nuclear genome (Table S3, see below). Note, if the GEM-BP and winBP peaks were very close together, only the GEM-BP peak was counted.

Nicked lariats are expected to be extremely unstable in vivo. However, the presence of such species in the 2D gel arc used in Branch-seq could result in read pairs that have 3' ends located at arbitrary positions in an intron paired with authentic 5'SS, potentially resulting in artefactual BP identification. The putative BP sequence identified from such read pairs should be sampled more or less randomly from intron locations, and therefore



would show no bias for proximity to a BP sequence motif, allowing estimation of the frequency of such artifacts from the frequency of poor matches to the BP consensus motif. In our analysis, we used a window +/- 15 bp from the peak of Branch-seq reads to identify BP motifs (see “Novel and annotated BP motifs”). Noting that for 247/268 cnBP the best match to the yeast consensus TACTAAC was within 2 nt of the peak of Branch-seq reads (a window of 5 start positions), and most matched well to the consensus, we calculated the probability  $P_{3mm+}$  (= 45%) that the best matching 7mer to the yeast consensus within 15 bp of an arbitrary position in an annotated yeast intron was NOT within 2 bp of the center, AND was a poor match to the consensus (3 mismatches or more from TACTAAC). Thus, we expect 45% of artefactual cases to have these features. From the observed number of cnBPs that have these features (= 5), one can estimate the number of artefactual BPs within the cnBP set as  $5/0.45 = \sim 11$ , or about 4% of the total. One might expect that the peak of Branch-seq reads should correspond very closely to the BP, as it did for annotated BPs (Fig. 2E), and we observed that the proportion of cnBPs with 3+ mismatches was much lower ( $7/247 = \sim 3\%$ ) when the best BP motif was within 2 bp of the Branch-seq peak, than when it was not ( $5/21 = 24\%$ ). These considerations motivate that cases where the best BP motif is within 2 bp of the peak be designated as “high confidence novel BPs” (hcnBPs) and cases where it is located further away – which likely have a much higher frequency of artifacts – be designated “low confidence novel BPs” (lcnBPs). Columns in Table S2 distinguish these two categories.

Another potential concern is that proteins bound to RNA may prevent exonucleolytic trimming causing identification of erroneous BP peaks downstream of annotated BPs. This is likely uncommon as 1) expanding the x-axis on Fig. 1C does not reveal strong peaks downstream of annotated BPs and 2) there are only 4 cases where a cnBP is located 3' of the annotated BP where the annotated and cnBP share the same 5'SS.

As a note, the overlap between the GEM-BP and winBP cnBP was only 80 BPs (Table 1), further suggesting that the two methods have different strengths and weaknesses in their ability to call novel BPs and there is benefit to using both methods.

One random position was selected in each of the 298 nuclear encoded intron containing genes in the SacCer3 genome annotation. The 6mer motif beginning at this location was score for number of mismatches from “GTATGT.” This was done 10 times to

obtain 2980 simulated 5'SS in introns. 10 motifs had 0 mismatches and 24 motifs had 1 mismatch for an estimated FDR of 1.1%  $((10+24)/2980)$  (Table S3).

### **Lariat tails are largely absent in vivo**

Lariat tails appear to be efficiently digested *in vivo*, as previously reported, evidenced by a dearth of Lariat-seq reads in the long lariat tail of *UBC13* (Fig. S1B). With Branch-seq we are able to see RT priming preferences based on the nucleotides left downstream of the BP nucleotide after digestion of the lariat tail. It appears 2 nt are generally left after the BP, resulting in RT priming peaks that begin at the +1 or +2 position relative to the BP (Fig S1C) depending on the genomic sequence at those positions (Fig. S1D-E). The peak at -2 relative to the BP is likely to miss-priming of RT (Fig. S1D). See Fig. S1 legend for more information. To our knowledge, this is the first report of the precise number of nucleotides downstream of the BP nucleotide left undigested in lariat tails from RNA isolated from *dbr1Δ* yeast.

### **Comparison of cnBP to Qin et al. novel BPs**

All 268 cnBP were compared to the 41 novel BP identified by Qin et al. Qin et al coordinates were liftedover from SacCer3 to SacCer2 for this comparison. Overall, 22 of the 41 novel BP reported by Qin et al were located within 7nt of cnBP (Table S2). Of the remaining 19 Qin BP, only 9 which had a good BP motif had no support from Branch-seq data and 7 of those 9 came from lariat loops > 100nt in length. We observe that Branch-seq is better at recovering lariat loops <100nt in length (Fig S3), explaining some of these 9 BPs. The remaining 10 Qin et al BPs are explained by a combination of difference reference BP annotations used, 5'SS with more than one mismatch from "GTATGT", and sequencing depth at those BP positions.

### **Mapping lariat junction reads**

Lariat junction reads were identified and aligned in four main steps:

1. Reads were attempted to be aligned to the *S.cer.* genome using the Bowtie (version 1.0.0) read aligner and those aligning with fewer than 4 mismatches were omitted from further analysis.

2. Each unalignable read was split into two fragments such that each fragment was at least 12 bases long and the hexamer beginning the second fragment had maximum probability of being sampled from the *S.cer.* 5'ss position weight matrix. Reads for which this maximum probability was less than 0.01 were omitted from further analysis. The fragments will be referred to by their position at the 3' or 5' end of the original read moving forwards.

3. The fragment pairs were mapped to the *S.cer.* genome using the bowtie read aligner allowing no mismatches. The fragments were required to map in an inverted order (3' fragment upstream of 5' fragment). The final base of each 5' fragment, the putative BP nucleotide, was omitted from this alignment due to the prevalence of mismatches at this position.

4. For all fragment pairs with a valid alignment, the final base of each 5' fragment was re-added. The aligned position of the 3' end of the 5' fragment was called as a BP and the aligned position of the 5' end of the 3' fragment was called as the corresponding 5'ss.

### **Skipping across lariat 5'SS-BP junctions**

We found that reverse transcriptase often introduces short insertions and deletions when crossing a lariat junction. This results in the 3' end of 5' fragment of lariat junction reads not always ending directly at the BP. The frequency of these events was determined by comparing the BP location called by each lariat junction read to a known BP location as annotated by Meyer et al. within 25 nts if one exists. Figure S2D reports the distribution when allowing no mismatches as used elsewhere in this paper. This criterion precluded observing insertion events as they were found to always have the sequence UACUACU at the 3' end of the 5' fragment, resulting in mismatches in the last two positions when aligned to the BP consensus motif.

### **BP calling from lariat junction reads**

In order to make precise BP calls from the lariat junction reads, a probabilistic model based on the observed skipping rates in introns with annotated BP and a self-learned BP motif position weight matrix (PWM) was used.

Reads were separated into clusters based on proximity of their downstream ends. The  $i^{th}$  cluster of reads is denoted by  $R_i$ . The distribution  $P(B_i = x | R_i)$ , where  $B_i$  is a RV indicating the location of the BP generating  $R_i$ , was computed using the proportion  $P(B_i = x | R_i) \propto P(R_i | B_i = x) * P(B_i = x)$ . Assuming a uniform prior and that reads are independent given a BP, we rewrite this proportion as  $P(B_i = x | R_i) \propto \prod_{r \in R_i} P(r | B_i = x)$ . Note that  $P(r | B_i = x)$  is simply the probability of observing a deletion of the size in read  $r$  given  $B_i = x$ .

An EM framework was used to learn a BP motif PWM, which was then used to improve precision. Beginning with an unbiased motif, the following protocol was repeated until the motif did not change between iterations:

1. Calculate  $P(B_i = x | R_i, M)$ , where  $M$  is the current motif, by multiplying  $P(B_i = x | R_i)$  and the probability that the motif implied by  $B_i = x$  would be sampled from  $M$  and then normalizing by the sum across each cluster.
2. Refine  $M$  based on the updated distribution. For each nucleotide in all positions in  $M$ , start with a pseudocount of 1. For all possible  $x$ , in all clusters  $i$ , add  $P(B_i = x | R_i, M)$  to the count for the nucleotide in the respective position, for each position in the motif. Normalize by dividing all counts by the number of clusters plus 4.

### Mapping RNA-seq reads for entropy calculations

60 X 60 bp reads (WT, upf1 null, and dbr1 null samples) were initially mapped with TopHat2 (Kim et al. 2013) (tophat-2.0.0.Linux\_x86\_64) giving TopHat no annotations and allowing it to discover novel splice junctions using the following parameters: **tophat -i 20 -I 10000 -a 10 --segment-length 15 --bowtie1 SacCer3 end1.fastq end2.fastq** Each barcoded sample was mapped on its own and additionally all samples were mapped together to find as many novel splice junctions as possible. A custom Bowite index was created for all splice junctions found by Tophat by concatenating the 50nt of sequence

immediately before and after the junction to ensure the reads had at least a 10nt overhang on each side of the junction. Bowtie1 was run with this custom index (genome + novel splice junctions) on each end of each sequencing library separately because paired end reads would be able to map to this custom index with many 100nt fragments. Bowtie was run as follows: **bowtie -S -m 1 -SacCer3\_custom\_index one\_end\_reads.fastq outfile.sam**. Bowtie read mapping to the custom splice index was used to calculate entropy of each splice junction (Graveley et al. 2011) using the formula below, as in Graveley et al., using the positions around the junction where read starts may fall.

$p_i = \text{reads at offset } i / \text{total reads to junction window}$

Entropy =  $-\sum_i (p_i * \log(p_i) / \log 2)$

The entropy cutoff of 2 bits corresponds to uniform coverage of at least 4 distinct read start positions around each splice junction, or more variable coverage of a larger number of positions (Fig. S4A).

### ***RPL30* AT-AC isoforms**

These isoforms insert a stop codon early in the message, generating an upstream open reading frame (uORF). These isoforms might therefore be translated under specific conditions via uORF-mediated translational regulation (Hinnebusch 1993), potentially producing a truncated protein comprising the C-terminal half of full length RPL30. RPL30 is known to regulate splicing and translation of transcripts from the *RPL30* locus by binding to RNA secondary structure at the 5' end of the pre-mRNA or mRNA.

### **Sequence conservation**

PhastCons scores were downloaded from the UCSC genome browser (phastCons7way) for the novel BP and novel splice site analyses. For the novel splice site plots, the entire region surrounding the splice site in the figure had to fall into the region of question (i.e., intron or CDS). “Intergenic” refers to any region completely outside of a CDS or intron. For the BP conservation plot, only the location of the BP was considered for classifying the BP by location.

## **Protein length analysis**

For all novel splice junctions with entropy at least 2 that overlap an annotated gene, the protein sequence of the resultant transcript was constructed. The length of each novel protein sequence was compared to the length of the annotated protein from the same gene and reported in Figure 4C. When constructing the novel protein sequences, the following assumptions were followed:

1. In cases where a gene has multiple novel splice junctions, only one is considered at a time (i.e. if there are 3 novel splice junctions in one gene, three protein sequences are created).
2. All annotated introns are spliced out, except if they overlap the novel splice junction being considered at the time.
3. If a novel splice junction removes the annotated translation start site, the next available AUG is used.

## **MISO analysis of splicing**

In order to produce Figure 6A, retained intron annotations were created from all splice junctions with entropy  $\geq 2$ . Retained introns were splice junctions detected in the WT, *upf1* null, or *dbr1* null samples that did not overlap any other splice junctions detected, annotated or novel. To build the RI MISO annotations 200nt flanking the intron was used as exonic sequence. MISO (misopy/0.4.6) was run. For Waern et al data (downloaded from [http://downloads.yeastgenome.org/published\\_datasets/Waern\\_2013\\_Pmid\\_23390610/fastaq/](http://downloads.yeastgenome.org/published_datasets/Waern_2013_Pmid_23390610/fastaq/)), --read-length = 76. For Brar et al. data (GEO accession number GSE34082), only reads of length 28-30 nt were used and --read-length was set to 29. Only footprints are shown for Brar et al. data because the total RNA libraries had few reads that fell into the 28-30 nt range. Prior to mapping Brar et al. data, poly(A) adaptor sequences were trimmed off of the reads using Cutadapt. Brar et al. and Waern et al. reads were mapped to the genome, defined splice junctions (UCSC, sacCer3), and novel splice junctions with entropy  $\geq 2$  in the WT, *upf1* null, and *dbr1* null RNA-seq (see above) using Tophat2. Summary tables from MISO output were generated for events with  $x=1$ ,  $y=0$ ,  $n=20$ , psi confidence = 0.5 (see

“Using the read class counts” <https://miso.readthedocs.org/en/fastmiso/>). These were considered “confident” psi values (see below).

In order to produce Figure 6B, annotations for all splice junctions detected in any sample with entropy  $\geq 2$  and all annotated introns were created. Splicing events that overlapped each other were grouped into one “gene” agnostic to known gene boundaries. The 200 nt flanking the furthest upstream 5'ss and the furthest downstream 3'ss for a given “gene” were used as exonic sequence. Miso (misopy/0.5.3) was run for all samples of both polyA and riboZero data. Events with a PSI confidence interval  $\geq .5$  or less than 20 reads uniquely assignable to either the given event isoform or the retained intron isoform were filtered out.

### **Clustering of PSI values**

If an event had confident PSI values in at least half of the conditions, the missing psi values were replaced with the mean PSI from the confident samples. Clustering was done with heatmap.2 in R (Warnes et al. 2015).

### **Cufflinks (RNA-seq FPKMs)**

Cufflinks(Trapnell et al. 2012) (version 2.2.1) was used to calculate FPKMs for the RNA-seq data using the command **cuffdiff -o . --library-type fr-firststrand -u -N -b SacCer3.fsa saccharomyces\_cerevisiae\_R64-1-1\_20110208.gff wt1.bam,wt1.bam dbr1-1.bam,dbr1-2.bam upf1-1.bam,upf1-2.bam**

### **Branch-seq CPM calculations**

Branch-seq CPMs were calculated using the formula  $CPM = F / ((L)(M/1,000,000))$  Where M is the total number of mapped reads. F is the number of strand-specific BP (3' end) reads within the L nucleotides centered on the BP peak. L=11 nt.

### **Genes with multiple BPs**

5'SS-BP pairs from annotated introns with computationally predicted BPs (282)(Meyer et al. 2011) and all 268 cnBPs with typical 5'SS 5'SS-BP were considered in this analysis for a total of 550 5'SS-BP pairs. Any overlapping 5'SS-BP pairs on the same

strand were grouped into one “intron island.” For islands that contain 2 or more BPs, it was required that there was a BP motif with 2 or fewer mismatches from “TACTAAC” within 3nt of the BP peak to keep the peak for downstream analyses. This yielded 11 intron islands that use 2 BPs and one intron island that uses 3 BPs. For the genes that use 2 BPs the distance from the 5'SS to the BP is the distance for each BP to its paired 5'SS. BP1 is the more 5'SS BP in the intron island. Sequence logos made with WebLogo (Crooks et al. 2004).

### **Novel and annotated BP motifs**

Sequence 15nt up and downstream of the BP peaks were submitted to MEME (Bailey et al. 2009) (Version 4.10.0) to generate sequence logos. Only BP detected by Branch-seq are in the logos in Figure 2.

Human BP motif was generated using sequences 10 nt up and downstream of the BP nt from Mercer et al's (Mercer et al. 2015) annotated BPs. 1000 sequences were submitted to MEME (maximum MEME accepts) to generate the motif.

### **Conditions in Figure 6A**

Conditions in (A), from table 1 of (Waern and Snyder 2013) include Exponential growth: YPD medium, Salt: 1M NaCl for 45 min, DNA damage: 1mM MMS for 1 hr, Alpha factor: 2.5mM for 45 min and add additional 50 uL to 25 mL yeast for additional 30 min, Sorbitol: 1M for 45 min, Oxidative stress: 0.4M H<sub>2</sub>O<sub>2</sub> for 45 min, Heat shock: 37 deg C for 1 hr, Stationary phase: 18 day at 30 deg C, SC glycerol media: 4% glycerol instead of glucose, High calcium = 10mM calcium chloride medium, Low nitrogen: 20% of normal amount of Yeast Nitrogen Base in YPAD, Calcoflour: 0.1% for 1 hr, Hydroxyurea: 0.075M for 1 hr, Grape juice: filtered Walgreen's brand grape juice, Benomyl: 5 ug/mL for 1 hr, Congo red: 30 ug/mL for 1 hr.

### **LSM2 qPCR primer sequences**

Actin primers:

ScerACT1\_junct\_F: ATGGATTCTGAGGTTGCTGCT

ScerACT1\_mRNA\_Rev: GGAGTCTTTTTGACCCATACCGA



*LSM2* constitutive exon:

LSM2 qPCR Exon 2F constitutive: TAAAAAACGACATTGAAATAAAAGGTACA

LSM qPCR Exon 2R constitutive: TTCATCTGTGCATGATATGTTGTCTA

*LSM2* novel 3'SS (PTC isoform):

LSM2 qPCR new 3'ss junction F: GTGGTCGTAGAGTCAAGTACTAAC

LSM qPCR Exon 2R constitutive: TTCATCTGTGCATGATATGTTGTCTA

*LSM2* annotated 3'SS isoform:

LSM2 qPCR canonical (normal) 3'ss junction F: GTGGTCGTAGAGTTAAAAAACGAC

LSM qPCR Exon 2R constitutive: TTCATCTGTGCATGATATGTTGTCTA

*RNA14* (NMD negative control):

GG10\_for: ATGTCCAGCTCTACGACTCCTGAT

GG11\_rev: GCGTATGACTCTTGAGTTTCCAAA (From Joshua Arribere(Arribere and Gilbert 2013))

*TCA17* (NMD positive control):

GG8\_for:GCCTTGCTTCGTATCATTGATAGA

GG9\_rev:CATCATCAGCTCCACTTAGGCTTT (From Joshua Arribere(Arribere and Gilbert 2013))

### ***RPL30* primer sequences**

RT: SuperScript II protocol (Invitrogen)

GG13\_YGL030W\_rev: AAGCCAACCTTTTGGTTGATAGA

PCR: Phusion (NEB)

GG14:YGL030W\_5'end\_for: agaccggagtgttaagaacct

GG15:YGL030W\_rev\_ATACjunc: TAACTGGGGCctgttgaat

### ***SED1* primers**

For Figure S4B:

RT: Random hexamers (Invitrogen), following SuperScript II protocol (Invitrogen).

PCR: Phusion (NEB)

GG17:SED1\_for: TACATCTTTGCCACCAAGCA

GG18:SED1\_rev: TTTGGTGGTAGTGCCCTTAGA

For Figure S5E - SED1 apparent RT artifact

Colony PCR was performed to put a T7 primer onto the start of the SED1 sequence. PCR product was gel extracted and used as a template for T7 in vitro transcription (Epicentre AmpliScribe™ T7-Flash™ Transcription Kit), DNA was digested, and RNA product was cleaned via phenol chloroform extraction. RNA was gel extracted using UV shadowing visualization. RT and PCR were performed as in Figure S5B.

Scer\_SED1\_colony\_Forward: TAATACGACTCACTATAGGGgacaagcaaaataaaatacgttcg

Scer\_SED1\_colony\_Reverse: ttaaactaccctattgcttttaga

### **Plotting**

Additional plots in this paper were made with ggplot2(Wickham 2009), IGV (Robinson et al. 2011), matplotlib, Pictogram, WebLobo, and MEME.

## Legends to Supplemental Figures

### Figure S1. Additional details pertaining to Branch-seq protocol.

(A) Left: 2D gel used to isolate lariats from top, middle, and bottom sections of arc. Right: Top and bottom splices excised. D1: 6% TBE-urea. D2: 20% TBE-urea. (B) Read coverage (green) in *UBC13* intron from Larita-seq. Depletion of reads between BP and 3'SS indicates lariat tails are digested when lariats accumulate in *dbp1Δ* yeast (Chapman and Boeke 1991). (C) Additional examples like inset in figure 1B of read start plots for BPs in 4 individual introns. The majority of reads are located at +1 or +2 position on an intron by intron basis. (D) Hypothesis for predominant +1 vs +2 read start position in individual introns. RNA sequence in black, question marks are unknown nucleotides after the BP. BP A in red. The RT primer, green, may prime at different locations, and produce sequencing products (blue arrow), starting at different positions relative to the BP nucleotide. +1 sequencing is expected if nucleotide after TACTAAC is an A because of anchored oligo(dT) priming step in RT. Similarly, +2 position is expected if nucleotide after TACTAAC is C, G, or T. Sequencing at -2 is due to mis-priming of anchored oligo(dT) primer over the terminal C of the BP motif. (E) Genomic sequence immediately downstream of annotated BPs (boxed) with maximum peak from (C) at +1, left, and +2, right, confirms hypothesis in (D). (F) Branch-seq reads in the *EFM5* intron are shifted 5 nt from the annotated BP location (blue underline) corresponding to a AACTAAC BP (red underline).

### Figure S2. Further characterization of novel BPs.

(A) Left: Novel BPs (blue) are not conserved compared to annotated BPs (red). Right: novel BPs from blue line in left plot broken down by genomic location. (B) 5'SS motif of 162 putative novel BP with atypical 5'SS. (C) Novel BP overlapping *YDL138W* ORF (plus strand) comes from the minus strand, potentially from a longer form of the annotated CUT/SUT on the minus strand. Novel BP is confirmed by one Branch-seq read pair and several Lariat-seq junction reads. (D) RT sometimes skips over the BP nucleotide in Lariat-seq junction reads (see methods).

**Figure S3. Characteristics of lariats captured by Branch-seq.**

(A) Comparison of expression levels of lariats recovered in Branch-seq (combined top, middle, and bottom slices of arc) to expression of their parent mRNA in poly(A) selected RNA-seq. Only annotated BPs are plotted. (B) Same as (A) but regression calculated for different lariat sizes, suggested that Branch-seq read counts are semi-quantitative for lariat loops smaller than 100 nt. (C) Expression level of annotated and novel BPs recovered by Branch-seq. (D) Lariat loop lengths recovered by Branch-seq and Lariat-seq LJ reads.

**Figure S4. Novel introns confirmed by entropy resemble annotated introns but preferentially come from short transcripts.**

(A) Entropy of annotated (green) and novel (pink) splice junctions, separated by splice site motif AT/AC, GC/AG, GT/AG. A cutoff of entropy of 2 was used to define novel splice junctions (Graveley et al. 2011). (B) 5'SS and 3'SS motifs for annotated (top) and novel (bottom) splice sites. (C) Gene lengths (TSS to poly(A) site) (Pelechano et al. 2013) for genes containing novel BPs identified in Branch-seq and genes containing novel introns with entropy  $\geq 2$  identified in RNA-seq data.

**Figure S5. Experimental testing of AT-AC splice site introns.**

RT-PCR on total RNA to verify (A) *RPL30* and (B) *SED1* AT-AC splice sites. *SED1* AT-AC splice site intron is located inside a long repeat (C) highlighted in green and (D) shown in a dot plot. (E) RT-PCR on in-vitro transcribed full length *SED1* RNA. The presence of a product here of the expected spliced size suggests the presence of some sort of RT artifact.

**Figure S6. Conservation of novel intron splice sites from isoforms that show splicing patterns similar to annotated introns.**

Arrows above each splice site indicate sequence direction. UCSC browser snapshots are shown for splice sites located outside of coding sequences.

**Figure S7. Translation of YNL194-YNL195C fusion transcript changes throughout meiosis time course.**

Sashimi plots depict reads in exons and reads spanning splice junction (numbered arcs) with PSI value shown to the right with confidence bounds (tie fighter plot). Plots are ordered by progression through meiosis time course from Brar et al. (Brar et al. 2012) for (A) ribosome footprint profiling data.

Table S1: Branch-seq BP peaks paired 5'SS motifs.

Table S2: SacCer2 coordinates of GEM-BP and winBP peaks.

Table S3: GTATGT motif frequency at 5'SS and generally in introns.

Table S4: Branch-seq CPMs.

Table S5: SaccCer3 coordinates of lariat junction reads.

Table S6: Novel splice junctions with entropy  $\geq 2$ bits.

Table S7: Figure 6A PSI values.

Table S8: Figure 6A event annotations.

Table S9: Figure 6B PSI values.

## Supplemental references

- Arribere JA, Gilbert WV. 2013. Roles for transcript leaders in translation and mRNA decay revealed by transcript leader sequencing. *Genome research* **23**: 977–987.
- Bailey TL, Boden M, Buske FA, Frith M, Grant CE, Clementi L, Ren J, Li WW, Noble WS. 2009. MEME SUITE: tools for motif discovery and searching. *Nucleic Acids Res* **37**: W202–8.
- Benjamin KR, Zhang C, Shokat KM, Herskowitz I. 2003. Control of landmark events in meiosis by the CDK Cdc28 and the meiosis-specific kinase Ime2. *Genes Dev* **17**: 1524–1539.
- Berchowitz LE, Gajadhar AS, van Werven FJ, De Rosa AA, Samoylova ML, Brar GA, Xu Y, Xiao C, Futcher B, Weissman JS, et al. 2013. A developmentally regulated translational control pathway establishes the meiotic chromosome segregation pattern. *Genes Dev* **27**: 2147–2163.
- Brar GA, Yassour M, Friedman N, Regev A, Ingolia NT, Weissman JS. 2012. High-resolution view of the yeast meiotic program revealed by ribosome profiling. *Science* **335**: 552–557.
- Carlile TM, Amon A. 2008. Meiosis I is established through division-specific translational control of a cyclin. *Cell* **133**: 280–291.
- Chapman KB, Boeke JD. 1991. Isolation and characterization of the gene encoding yeast debranching enzyme. *Cell* **65**: 483–492.
- Clarkson BK, Gilbert WV, Doudna JA. 2010. Functional overlap between eIF4G isoforms in *Saccharomyces cerevisiae*. *PLoS ONE* **5**: e9114.  
<http://eutils.ncbi.nlm.nih.gov/entrez/eutils/elink.fcgi?dbfrom=pubmed&id=20161741&retmode=ref&cmd=prlinks>.
- Crooks GE, Hon G, Chandonia J-M, Brenner SE. 2004. WebLogo: a sequence logo generator. *Genome research* **14**: 1188–1190.
- Folco EG, Lei H, Hsu JL, Reed R. 2012. Small-scale nuclear extracts for functional assays of gene-expression machineries. *J Vis Exp*.
- Folco EG, Reed R. 2014. In vitro systems for coupling RNAP II transcription to splicing and polyadenylation. *Methods in molecular biology (Clifton, NJ)* **1126**: 169–177.

<http://eutils.ncbi.nlm.nih.gov/entrez/eutils/elink.fcgi?dbfrom=pubmed&id=24549664&retmode=ref&cmd=prlinks>.

Graveley BR, Brooks AN, Carlson JW, Duff MO, Landolin JM, Yang L, Artieri CG, van Baren MJ, Boley N, Booth BW, et al. 2011. The developmental transcriptome of *Drosophila melanogaster*. *Nature* **471**: 473–479.

Hinnebusch AG. 1993. Gene-specific translational control of the yeast GCN4 gene by phosphorylation of eukaryotic initiation factor 2. *Mol Microbiol* **10**: 215–223.

Ingolia NT, Ghaemmaghami S, Newman JRS, Weissman JS. 2009. Genome-Wide Analysis in Vivo of Translation with Nucleotide Resolution Using Ribosome Profiling. *Science* **324**: 218–223.

Katz Y, Li F, Lambert NJ, Sokol ES, Tam W-L, Cheng AW, Airoidi EM, Lengner CJ, Gupta PB, Yu Z, et al. 2014. Musashi proteins are post-transcriptional regulators of the epithelial-luminal cell state. *eLife* **3**: e03915.  
<http://eutils.ncbi.nlm.nih.gov/entrez/eutils/elink.fcgi?dbfrom=pubmed&id=25380226&retmode=ref&cmd=prlinks>.

Kim D, Pertea G, Trapnell C, Pimentel H, Kelley R, Salzberg SL. 2013. TopHat2: accurate alignment of transcriptomes in the presence of insertions, deletions and gene fusions. *Genome Biol* **14**: R36.

Langmead B, Trapnell C, Pop M, Salzberg SL. 2009. Ultrafast and memory-efficient alignment of short DNA sequences to the human genome. *Genome biology* **10**: R25.  
<http://eutils.ncbi.nlm.nih.gov/entrez/eutils/elink.fcgi?dbfrom=pubmed&id=19261174&retmode=ref&cmd=prlinks>.

Li H, Handsaker B, Wysoker A, Fennell T, Ruan J, Homer N, Marth G, Abecasis G, Durbin R, 1000 Genome Project Data Processing Subgroup. 2009. The Sequence Alignment/Map format and SAMtools. *Bioinformatics (Oxford, England)* **25**: 2078–2079.  
<http://eutils.ncbi.nlm.nih.gov/entrez/eutils/elink.fcgi?dbfrom=pubmed&id=19505943&retmode=ref&cmd=prlinks>.

Mercer TR, Clark MB, Andersen SB, Brunck ME, Haerty W, Crawford J, Taft RJ, Nielsen LK, Dinger ME, Mattick JS. 2015. Genome-wide discovery of human splicing branchpoints. *Genome research*.

Meyer M, Plass M, Pérez-Valle J, Eyraas E, Vilardell J. 2011. Deciphering 3' splice site selection in the yeast genome reveals an RNA thermosensor that mediates alternative splicing. *Mol Cell*

**43:** 1033–1039.

Pelechano V, Wei W, Steinmetz LM. 2013. Extensive transcriptional heterogeneity revealed by isoform profiling. *Nature* **497**: 127–131.

Robinson JT, Thorvaldsdóttir H, Winckler W, Guttman M, Lander ES, Getz G, Mesirov JP. 2011. Integrative genomics viewer. *Nat Biotechnol* **29**: 24–26.

Trapnell C, Roberts A, Goff L, Pertea G, Kim D, Kelley DR, Pimentel H, Salzberg SL, Rinn JL, Pachter L. 2012. Differential gene and transcript expression analysis of RNA-seq experiments with TopHat and Cufflinks. *Nat Protoc* **7**: 562–578.

Waern K, Snyder M. 2013. Extensive transcript diversity and novel upstream open reading frame regulation in yeast. *G3 (Bethesda, Md)* **3**: 343–352.  
<http://eutils.ncbi.nlm.nih.gov/entrez/eutils/elink.fcgi?dbfrom=pubmed&id=23390610&retmode=ref&cmd=prlinks>.

Warnes GR, Ben Bolker, Bonebakker L, Gentleman R, Liaw WHA, Lumley T, Maechler M, Magnusson A, Moeller S, Schwartz M, et al. 2015. gplots: Various R Programming Tools for Plotting Data. R package version 2.16.0. *CRANR-project.org*.

Wickham H. 2009. ggplot2: elegant graphics for data analysis.



Figure S1

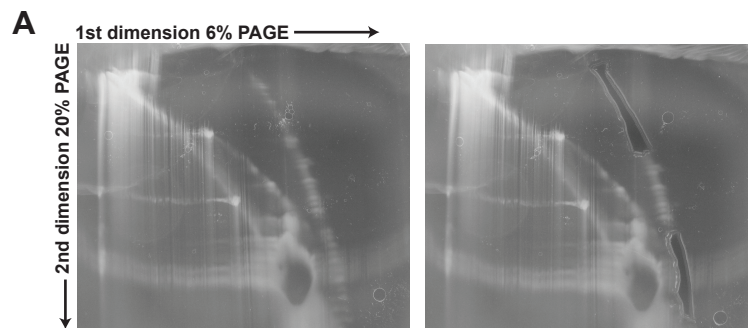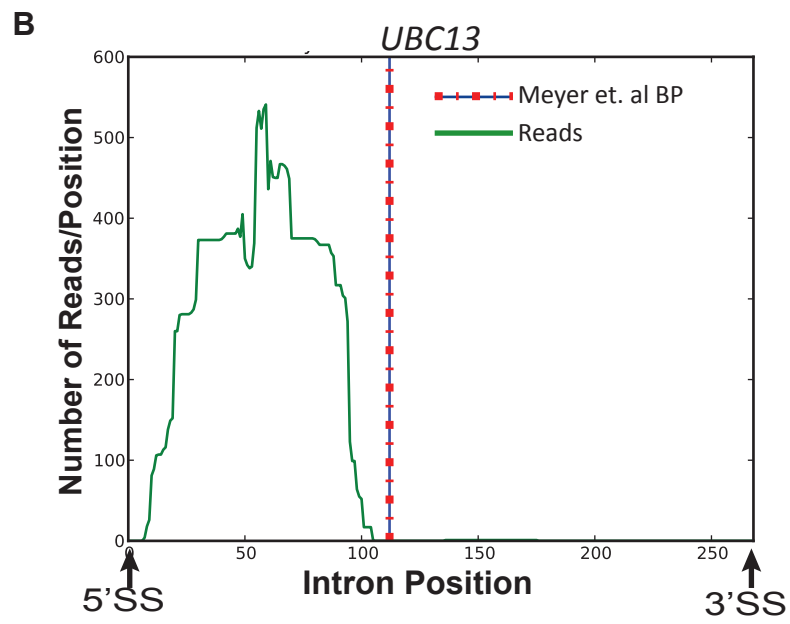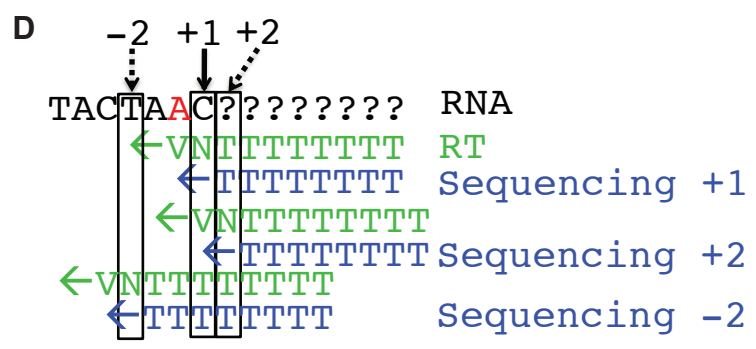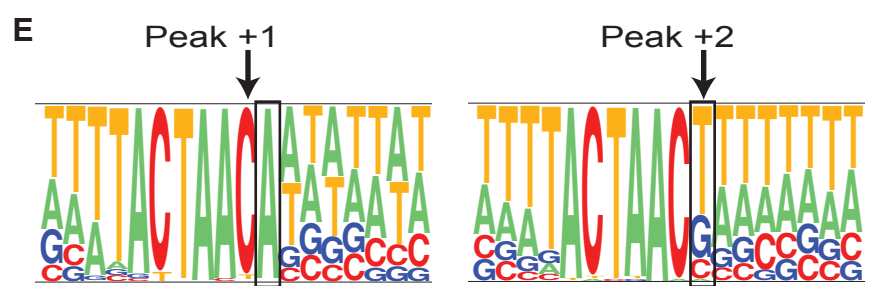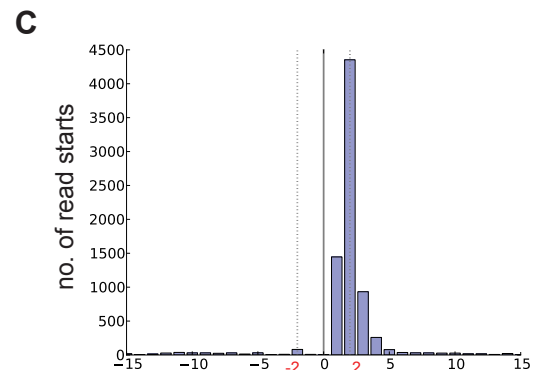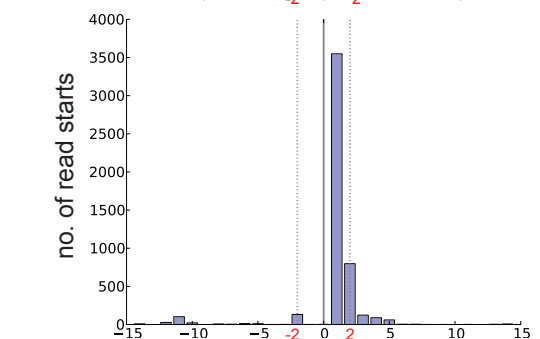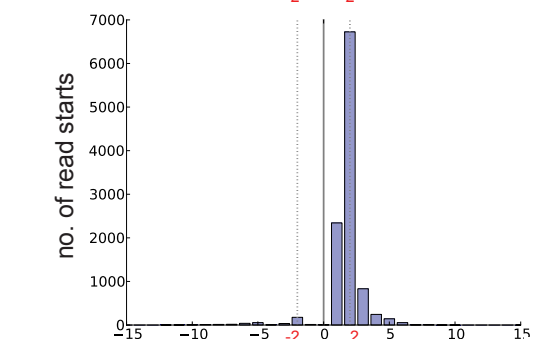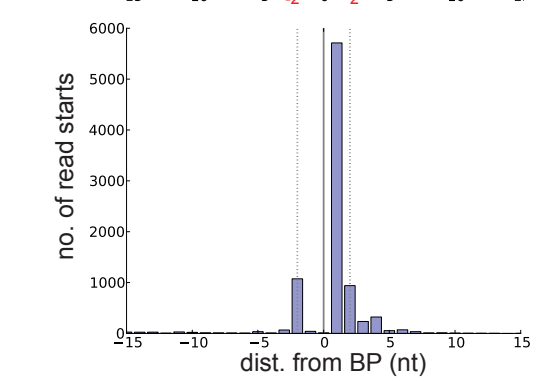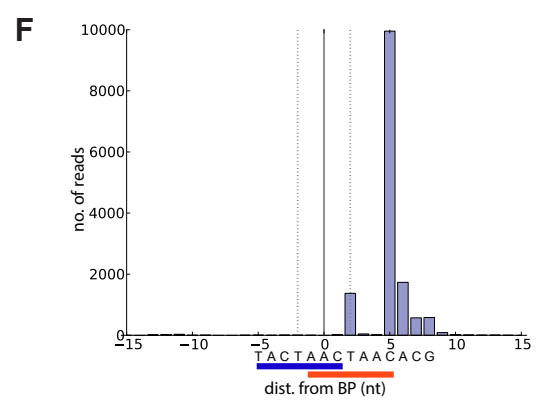

Figure S2

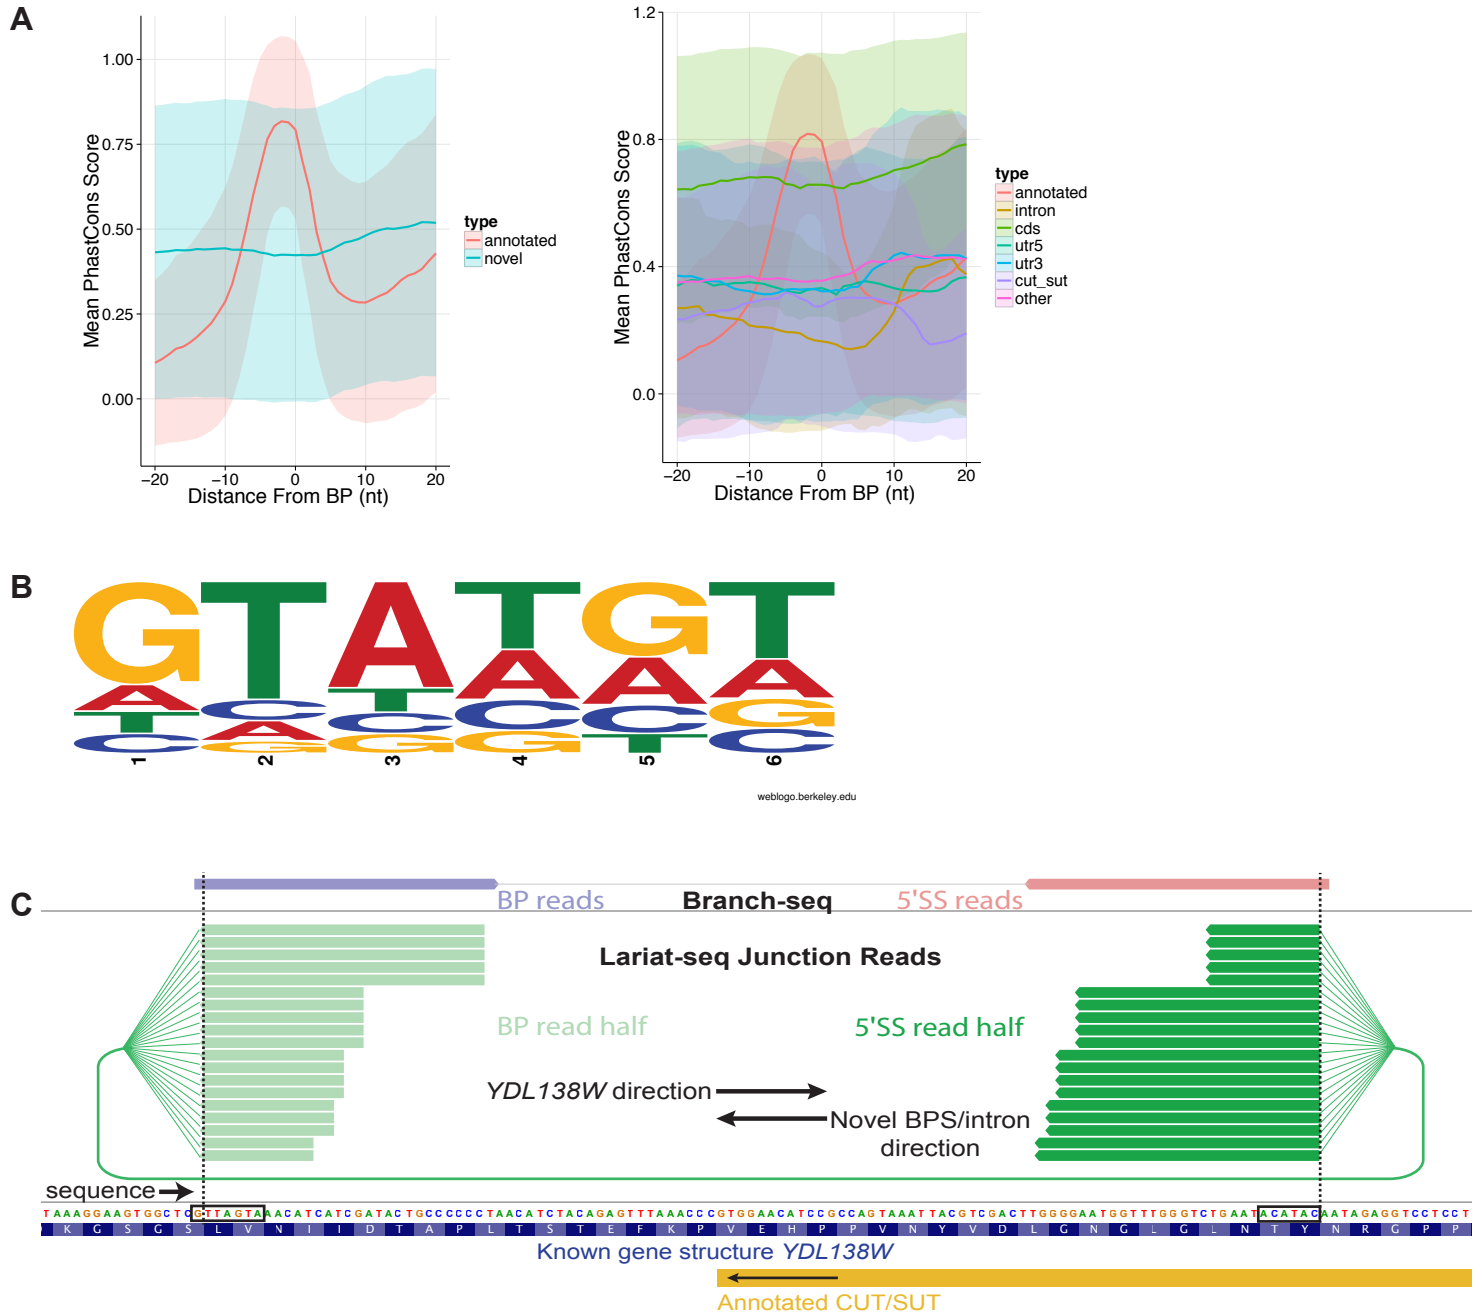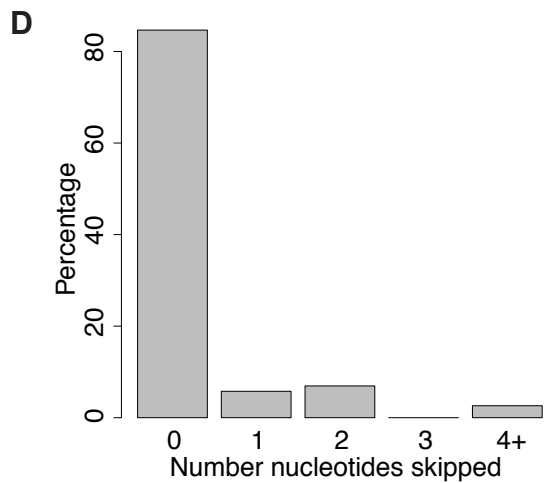

Figure S3

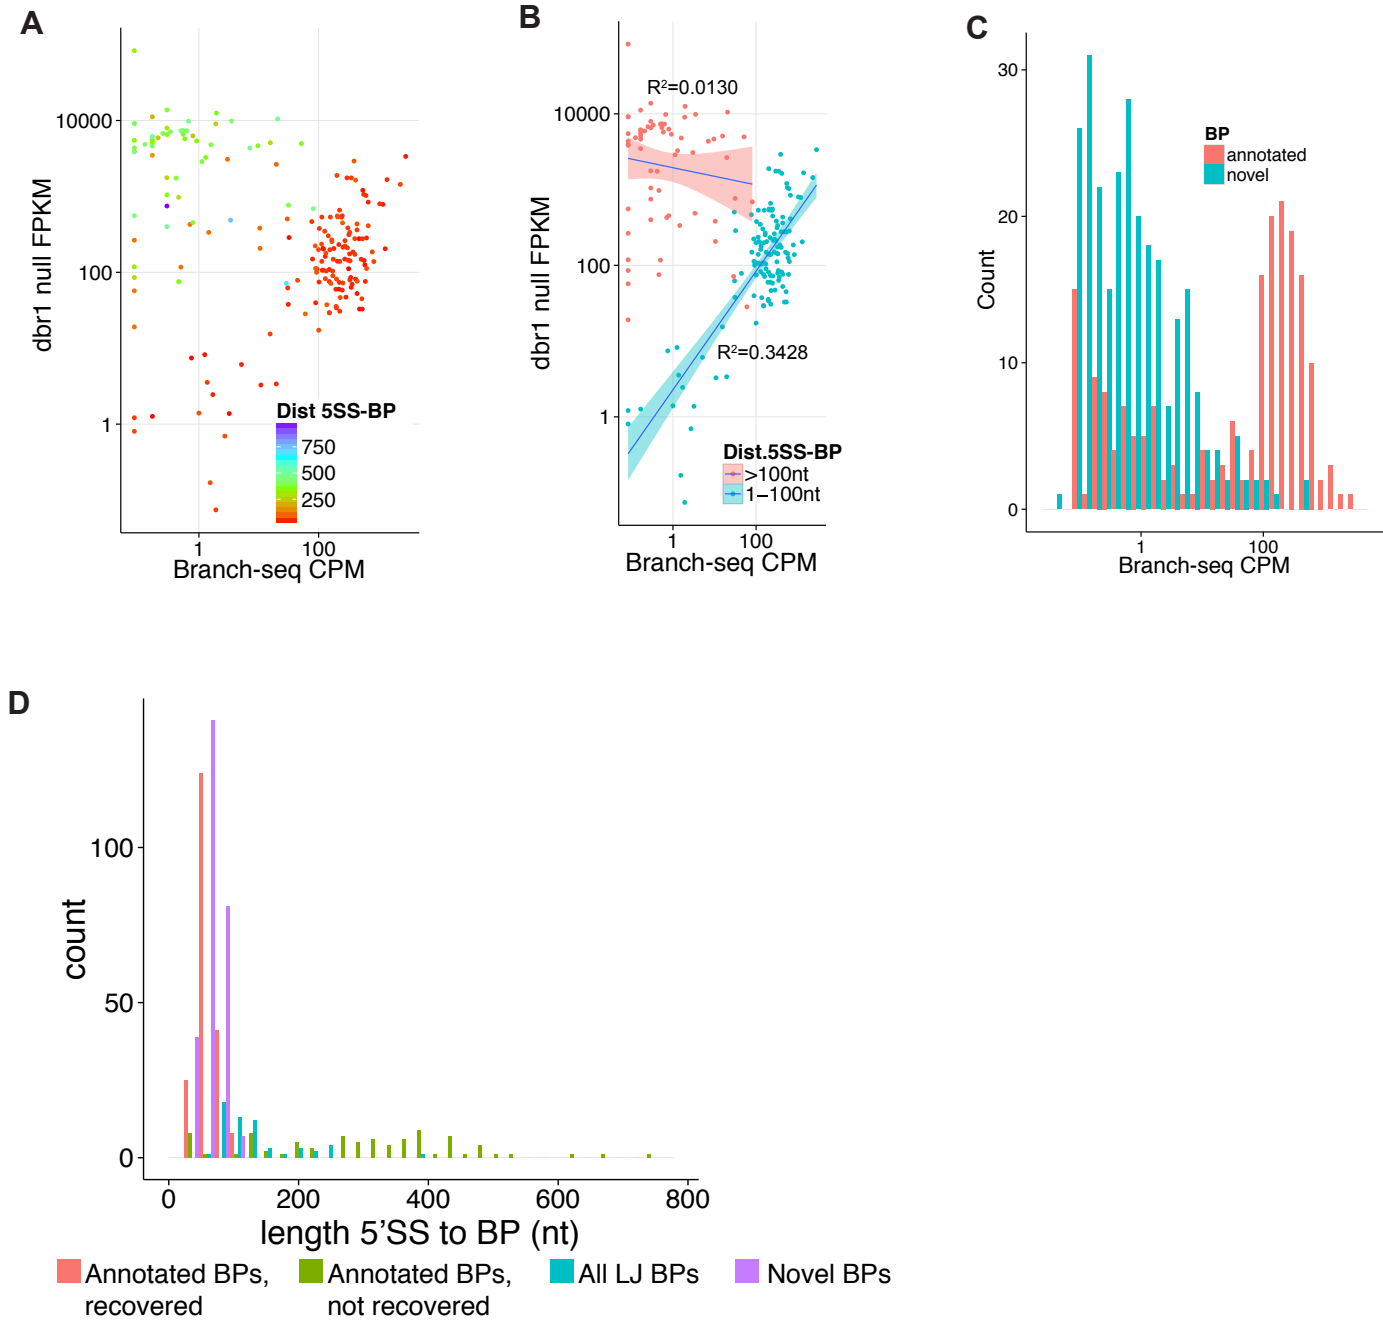

Figure S4

A

### Entropy of splice junctions

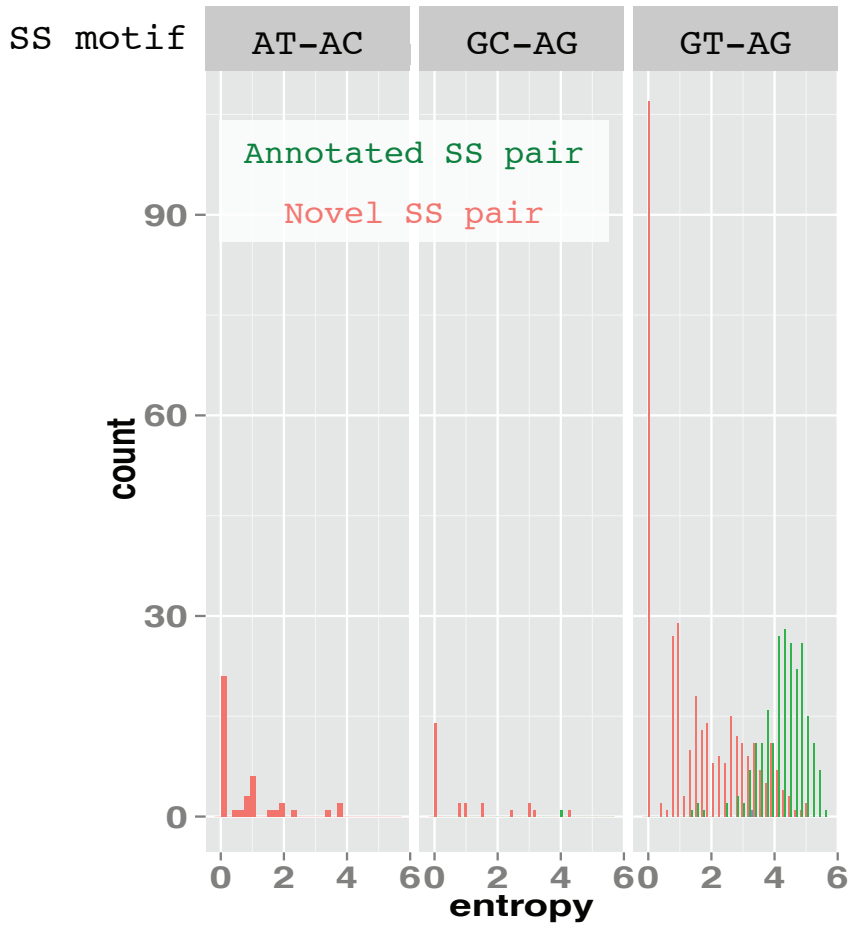

B

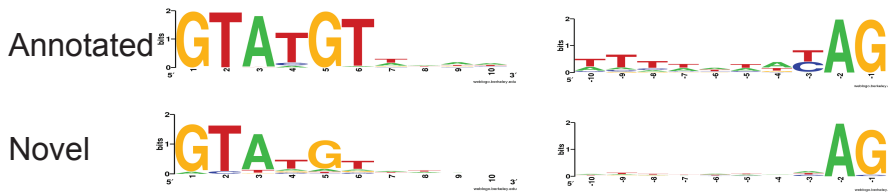

C

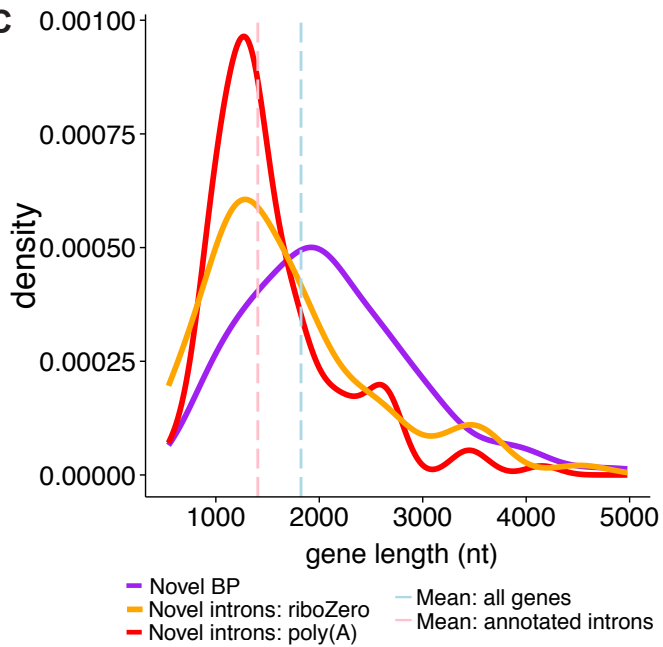

Figure S5

**A**

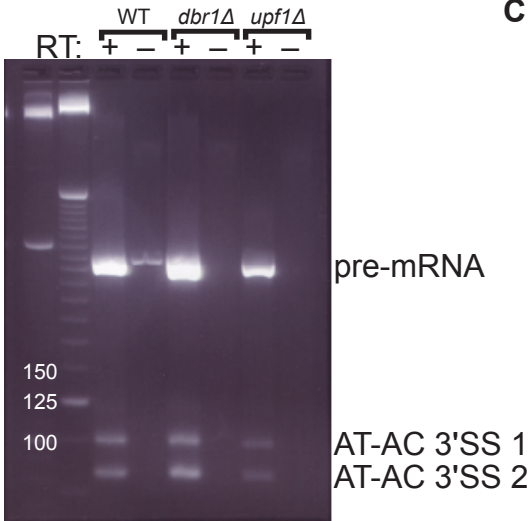

RPL30 PCR Expected Sizes  
pre-mRNA = 297nt  
AT-AC = 83nt

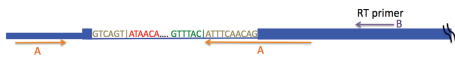

**B**

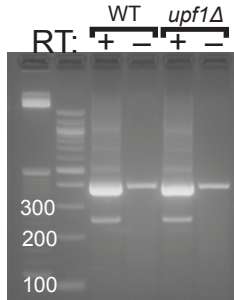

SED1 PCR Expected Sizes  
No intron = 409nt  
predicted (ent) AT-AC = 301nt  
actual AT-AC = 256nt

**D**

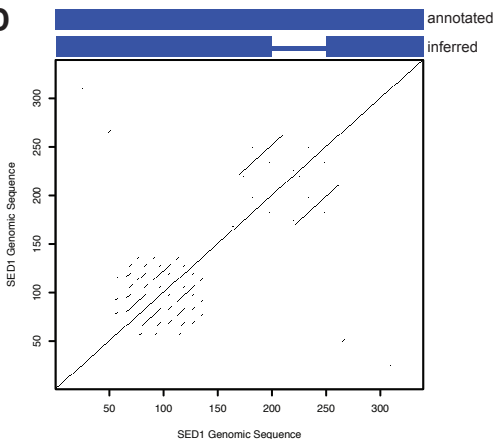

**C**

CLUSTAL 2.1 multiple sequence alignment

|                             |                                                              |      |
|-----------------------------|--------------------------------------------------------------|------|
| SED1_Genomic<br>PCR-band-05 | ATGAAATTATCAACTGTCTATTATCTGCCGGTTTAGCCTCGACTACTTTGGCCAATTT   | 60   |
| SED1_Genomic<br>PCR-band-05 | TCCAACAGTACATCTGCTTCTTCCACCGATGTCACTTCTCCTCTTCCATCTCCACTTCC  | 120  |
| SED1_Genomic<br>PCR-band-05 | TCTGGCTCAGTAATATCACATCTTCTGAAGCTCCAGAATCCGACAACGGTACCAGCACA  | 180  |
| SED1_Genomic<br>PCR-band-05 | GCTGCACCAACTGAAACCTCAACAGAGGCTCCAACCCTGCTATCCCAACTAACGGTACC  | 240  |
| SED1_Genomic<br>PCR-band-05 | TCTACTGAAGTCCAACCCTGCTATCCCAACTAACGGTACTCTACTGAAGCTCCAAC     | 300  |
| SED1_Genomic<br>PCR-band-05 | GATACTACTACTGAAGTCCAACCACCGCTCTTCCAACTAACGGTACTCTACTGAAGCT   | 360  |
| SED1_Genomic<br>PCR-band-05 | CCAACTGATACTACTACTGAAGTCCAACCACCGGCTTCCAACCAACGGTACCCTTCA    | 420  |
| SED1_Genomic<br>PCR-band-05 | GCTTCCCAACTACATCTTTGCCCAAGCAACTACCACCCTCCTCTTACAAC           | 480  |
| SED1_Genomic<br>PCR-band-05 | CCATCTACTGACTACACCCTGACTACACTGTAGTCACTGAATATACTACTTACTGTCCA  | 540  |
| SED1_Genomic<br>PCR-band-05 | -CATCTACTGACTACACCCTGACTACACTGTAGTCACTGAATATACTACTTACTGTCCA  | 59   |
| SED1_Genomic<br>PCR-band-05 | GAACCAACCCTTTCACCACAACGGTAAGACTTACACCGTCACTGAACCAACCACATG    | 600  |
| SED1_Genomic<br>PCR-band-05 | GAACCAACCCTTTCACCACAACGGTAAGACTTACACCGTCACTGAACCAACCAC-----  | 115  |
| SED1_Genomic<br>PCR-band-05 | ACTATCACTGACTGTCCATGCACCATTGAAAAGCCAACAACCACATCAACCACCGAATAC | 660  |
| SED1_Genomic<br>PCR-band-05 | ACTGTAGTCACTGAGTACACTACTTACTGTCCAGAACCAACCCTTTCACCACAACGGT   | 720  |
| SED1_Genomic<br>PCR-band-05 | AAGACTTACACCGTCACTGAACCAACCCTTGTACTATCACTGACTGTCCATGTACTATT  | 780  |
| SED1_Genomic<br>PCR-band-05 | -----TTTGACTATCACTGACTGTCCATGTACTATT                         | 146  |
| SED1_Genomic<br>PCR-band-05 | GAAAAGAGCGAAGCCCCTGAGTCTTCTGTCCAGTTACCGAATCTAAGGGCACTACCACC  | 840  |
| SED1_Genomic<br>PCR-band-05 | GAAAAGAGCGAAGCCCCTGAGTCTTCTGTCCAGTTACCGAATCTAAGGGCACTACCACC  | 206  |
| SED1_Genomic<br>PCR-band-05 | AAAGAAACAGGTGTTACTACCAACAACACAGCCAAACCAAGTCTAACCGTCTCCACA    | 900  |
| SED1_Genomic<br>PCR-band-05 | AAA-----                                                     | 209  |
| SED1_Genomic<br>PCR-band-05 | GTCGTCCAGTTTCATCTGCTTCTTCTCATTCGTTGTCATCAACAGTAACGGTGCT      | 960  |
| SED1_Genomic<br>PCR-band-05 | AACGTCGTCGTTCCAGGTGCTTTAGGTTTGGCTGGTGTGCTATGTTATTCTTATAA     | 1017 |

**E**

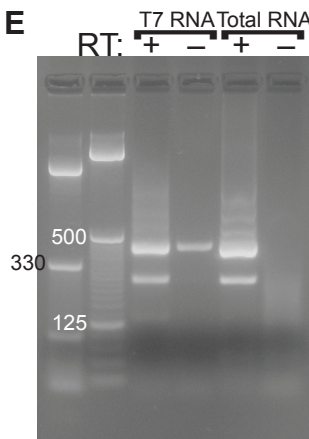

Figure S6

*MTR2* ←

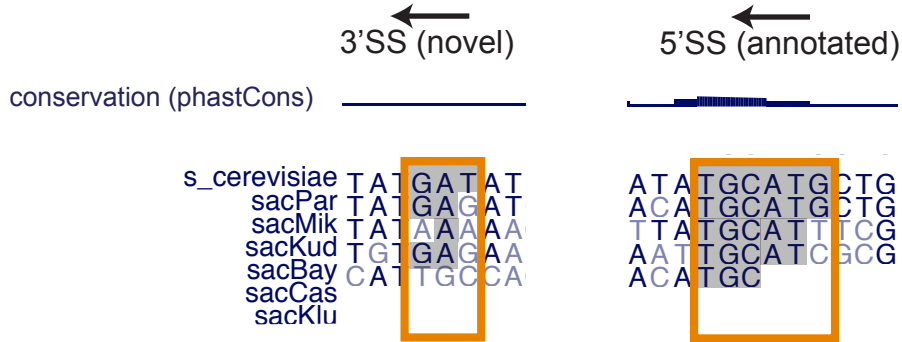

*RPL34B* →

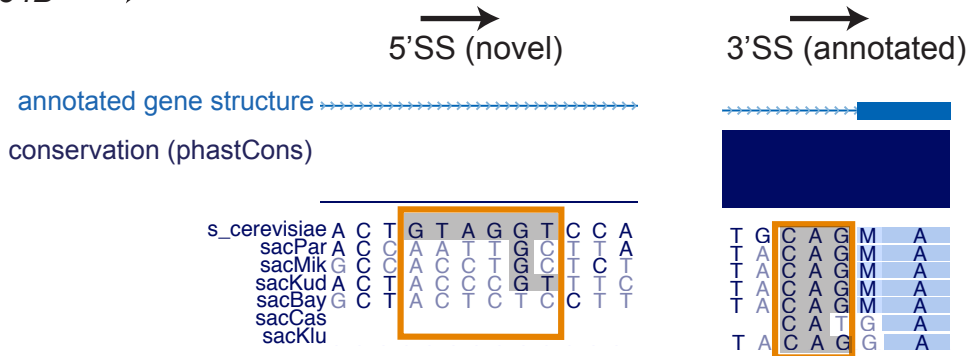

*YNL194C-YNL195C* fusion ←

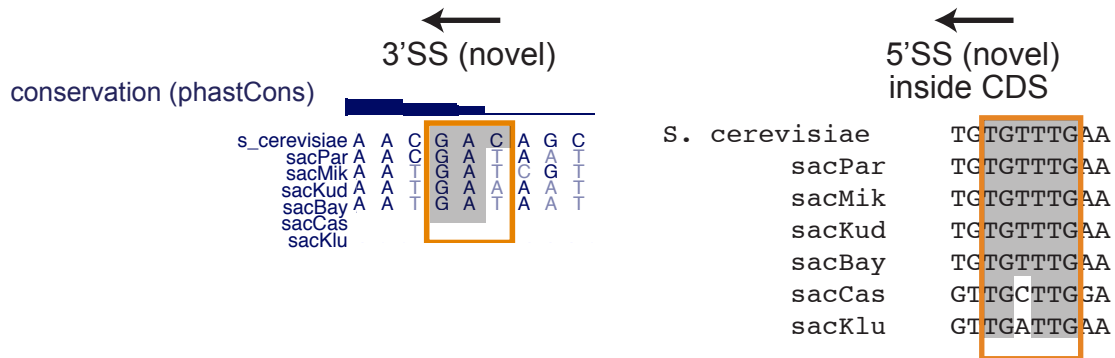

Figure S7

A

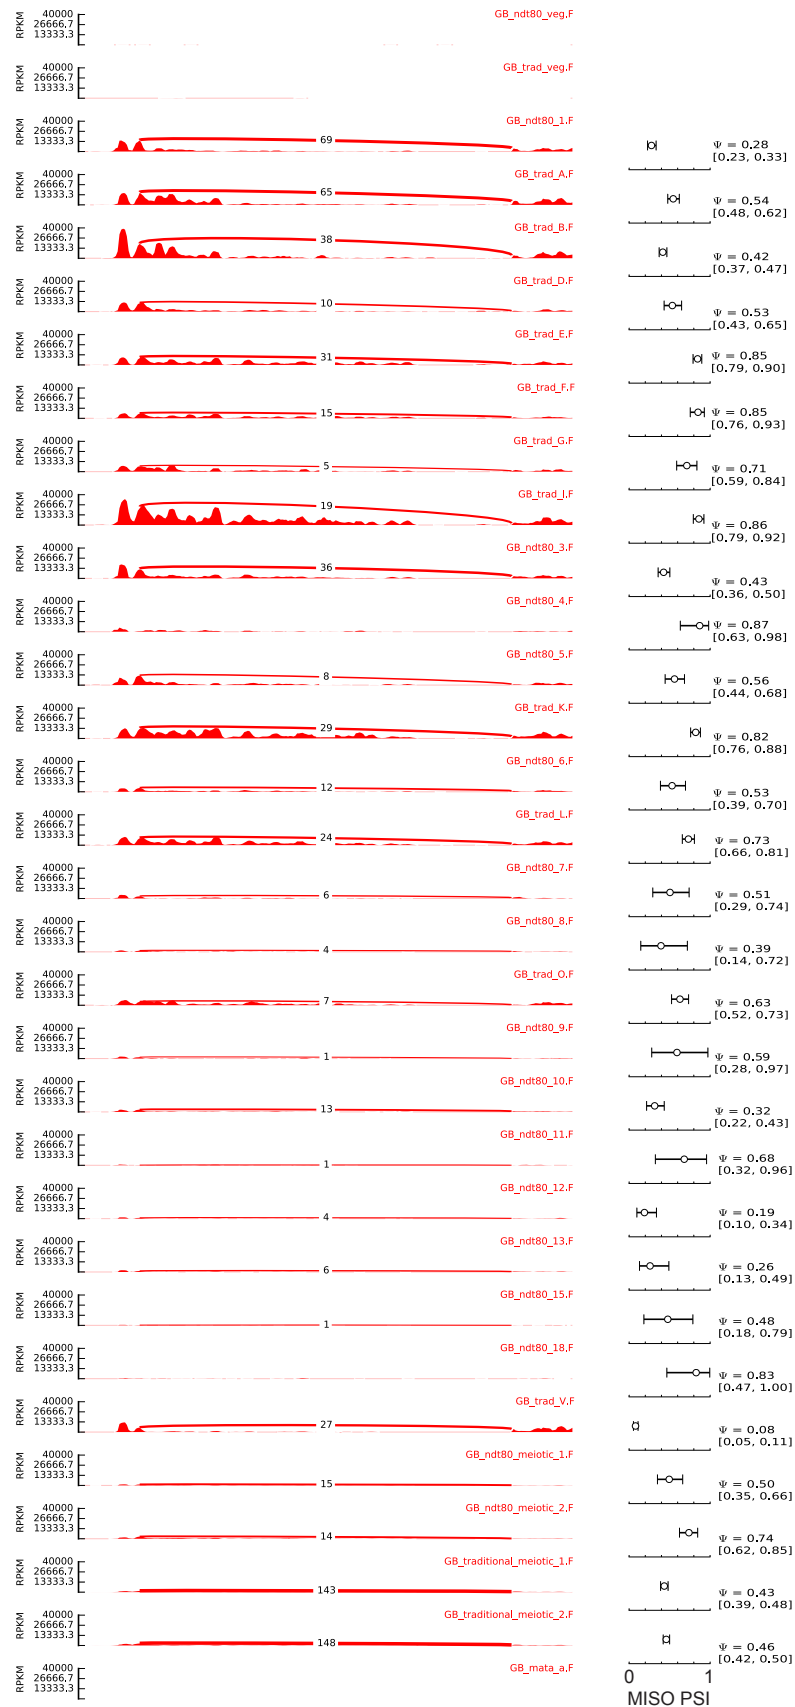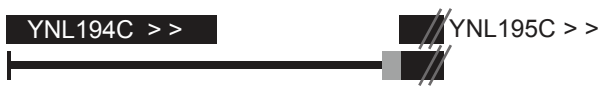

## Supplementary Tables

**Table S1. Branch-seq BP peaks paired 5'SS motifs.**

| <b>No. mismatches from /GTATGT</b> | <b>0</b> | <b>1</b> | <b>2</b> | <b>3</b> | <b>4</b> | <b>5</b> | <b>6</b> | <b>All</b> | <b>0 or 1 mut</b> | <b>% 0 or 1 mut</b> |
|------------------------------------|----------|----------|----------|----------|----------|----------|----------|------------|-------------------|---------------------|
| 153 annotated BPs: winBP           | 103      | 35       | 7        | 7        | 1        | 0        | 0        | 153        | 138               | 90.20               |
| 191 putative novel BPs: winBP      | 64       | 62       | 28       | 13       | 18       | 5        | 1        | 191        | 126               | 65.97               |
| 196 annotated BPs: GEM-BP          | 105      | 44       | 24       | 16       | 7        | 0        | 0        | 196        | 149               | 76.02               |
| 350 putative novel BPs: GEM-BP     | 61       | 161      | 78       | 34       | 12       | 3        | 1        | 350        | 222               | 63.43               |



Table S2: GEM-BP and winBP peaks

| chr    | bp_nt  | strand | 5ss_bp_pair            | winBP | GEM-BP | bp_anno | 5ss_anno | 5ss_mm | 5ss    | u      | a | u | n | cnBP | lcnBP | hcnBP | Qin_novel | best_bp_in15 | best_bp_mm | best_bp_nt_in15 |
|--------|--------|--------|------------------------|-------|--------|---------|----------|--------|--------|--------|---|---|---|------|-------|-------|-----------|--------------|------------|-----------------|
| chrI   | 30553  | -      | chrI:30553:30626:-     | 0     | 1      | 0       | 0        | 3      | AAGTGT | 0      | 1 | 0 | 0 | 0    | 0     | 0     | 0         | GATTAAC      | 2          | 30553           |
| chrI   | 31426  | -      | chrI:31426:31464:-     | 0     | 1      | 0       | 0        | 3      | ATAACT | 0      | 1 | 0 | 0 | 0    | 0     | 0     | 0         | CATTAAC      | 2          | 31426           |
| chrI   | 78465  | +      | chrI:78419:78465:+     | 0     | 1      | 0       | 0        | 2      | GTGTGG | 0      | 1 | 0 | 0 | 0    | 0     | 0     | 0         | TACTAAC      | 0          | 78465           |
| chrI   | 87439  | +      | chrI:87389:87439:+     | 1     | 1      | 1       | 1        | 1      | GTAAGT | 1      | 0 | 0 | 0 | 0    | 0     | 0     | 0         | TACTAAC      | 0          | 87439           |
| chrI   | 126072 | +      | chrI:125985:126072:+   | 0     | 1      | 0       | 0        | 1      | GTATGG | 0      | 1 | 1 | 0 | 1    | 1     | 0     | 1         | CATTAAC      | 2          | 126072          |
| chrI   | 134872 | -      | chrI:134872:134944:-   | 0     | 1      | 0       | 0        | 1      | GTAAGT | 0      | 1 | 1 | 0 | 1    | 1     | 0     | 1         | CACTAAC      | 1          | 134872          |
| chrI   | 142338 | +      | chrI:142256:142338:+   | 1     | 0      | 0       | 1        | 0      | GTATGT | 0      | 0 | 0 | 0 | 0    | 0     | 0     | 0         | AACTAAT      | 2          | 142344          |
| chrI   | 142344 | +      | chrI:142256:142344:+   | 0     | 1      | 0       | 1        | 0      | GTATGT | 0      | 1 | 1 | 0 | 1    | 1     | 0     | 1         | AACTAAT      | 2          | 142344          |
| chrI   | 151022 | -      | chrI:151022:151098:-   | 1     | 1      | 1       | 1        | 0      | GTATGT | 1      | 0 | 0 | 0 | 0    | 0     | 0     | 0         | TACTAAC      | 0          | 151022          |
| chrI   | 152002 | -      | chrI:152002:152055:-   | 1     | 0      | 0       | 0        | 2      | GTATAC | 0      | 0 | 0 | 0 | 0    | 0     | 0     | 0         | TACTAAT      | 1          | 152004          |
| chrI   | 152004 | -      | chrI:152004:152055:-   | 0     | 1      | 0       | 0        | 2      | GTATAC | 0      | 1 | 0 | 0 | 0    | 0     | 0     | 0         | TACTAAT      | 1          | 152004          |
| chrI   | 157810 | -      | chrI:157810:157862:-   | 0     | 1      | 0       | 0        | 2      | GTATAC | 0      | 1 | 0 | 0 | 0    | 0     | 0     | 0         | TACTAAT      | 1          | 157810          |
| chrII  | 13950  | -      | chrII:13950:14027:-    | 1     | 1      | 0       | 0        | 0      | GTATGT | 0      | 1 | 1 | 0 | 1    | 1     | 0     | 1         | TACTAAC      | 0          | 13950           |
| chrII  | 45936  | +      | chrII:45875:45936:+    | 0     | 1      | 0       | 0        | 2      | GCATGC | 0      | 1 | 0 | 0 | 0    | 0     | 0     | 0         | TACTAAC      | 0          | 45936           |
| chrII  | 47071  | -      | chrII:47071:47143:-    | 1     | 1      | 1       | 1        | 0      | GTATGT | 1      | 0 | 0 | 0 | 0    | 0     | 0     | 0         | TACTAAT      | 1          | 47071           |
| chrII  | 49796  | +      | chrII:49765:49796:+    | 0     | 1      | 0       | 0        | 3      | GAACGC | 0      | 1 | 0 | 0 | 0    | 0     | 0     | 0         | AACTAAT      | 2          | 49796           |
| chrII  | 76232  | +      | chrII:76189:76232:+    | 0     | 1      | 0       | 0        | 1      | GTCTGT | 0      | 1 | 1 | 0 | 1    | 1     | 0     | 1         | TACTAAC      | 0          | 76232           |
| chrII  | 89158  | -      | chrII:89158:89219:-    | 0     | 1      | 0       | 0        | 4      | CAAAGC | 0      | 1 | 0 | 0 | 0    | 0     | 0     | 0         | TACTAAC      | 0          | 89158           |
| chrII  | 110451 | -      | chrII:110451:110507:-  | 1     | 1      | 1       | 1        | 1      | GTAAGT | 1      | 0 | 0 | 0 | 0    | 0     | 0     | 0         | TACTAAC      | 0          | 110451          |
| chrII  | 110932 | +      | chrII:110882:110932:+  | 1     | 1      | 1       | 1        | 1      | GTATGC | 1      | 0 | 0 | 0 | 0    | 0     | 0     | 0         | TACTAAC      | 0          | 110932          |
| chrII  | 115534 | +      | chrII:115478:115534:+  | 1     | 0      | 0       | 0        | 0      | GTATGT | 0      | 1 | 1 | 0 | 1    | 1     | 0     | 1         | TACTAAC      | 1          | 115536          |
| chrII  | 125234 | +      | chrII:125158:125234:+  | 1     | 1      | 1       | 1        | 1      | 0      | GTATGT | 1 | 0 | 0 | 0    | 0     | 0     | 0         | TACTAAC      | 0          | 125234          |
| chrII  | 142787 | -      | chrII:142787:142849:-  | 1     | 1      | 1       | 1        | 1      | 0      | GTATGT | 1 | 0 | 0 | 0    | 0     | 0     | 0         | TACTAAC      | 0          | 142787          |
| chrII  | 142813 | -      | chrII:142813:142850:-  | 1     | 0      | 0       | 0        | 3      | CTAAGA | 0      | 1 | 0 | 0 | 0    | 0     | 0     | 0         | ATCGAAC      | 3          | 142801          |
| chrII  | 167928 | +      | chrII:167855:167928:+  | 0     | 1      | 0       | 0        | 1      | GTAAGT | 0      | 1 | 1 | 0 | 1    | 1     | 0     | 1         | TACTAAT      | 1          | 167928          |
| chrII  | 168770 | +      | chrII:168696:168770:+  | 0     | 1      | 1       | 0        | 2      | GTAATT | 1      | 0 | 0 | 0 | 0    | 0     | 0     | 0         | TACTAAC      | 0          | 168770          |
| chrII  | 170731 | +      | chrII:170680:170731:+  | 1     | 0      | 0       | 1        | 0      | GTATGT | 0      | 1 | 1 | 0 | 1    | 1     | 0     | 1         | AACTAAC      | 1          | 170730          |
| chrII  | 170771 | +      | chrII:170680:170771:+  | 1     | 1      | 1       | 1        | 1      | 0      | GTATGT | 1 | 0 | 0 | 0    | 0     | 0     | 0         | TACTAAC      | 0          | 170771          |
| chrII  | 186375 | -      | chrII:186375:186430:-  | 1     | 1      | 1       | 1        | 1      | 0      | GTATGT | 1 | 0 | 0 | 0    | 0     | 0     | 0         | TACTAAC      | 0          | 186375          |
| chrII  | 206285 | +      | chrII:206192:206285:+  | 0     | 1      | 0       | 0        | 0      | GTATGT | 0      | 1 | 1 | 0 | 1    | 1     | 0     | 1         | TACTAAC      | 0          | 206285          |
| chrII  | 221024 | +      | chrII:220982:221024:+  | 1     | 0      | 0       | 0        | 1      | GTATGA | 0      | 1 | 1 | 1 | 1    | 0     | 0     | 0         | CTCTAAC      | 2          | 221027          |
| chrII  | 290471 | -      | chrII:290471:290528:-  | 0     | 1      | 0       | 0        | 0      | GTATGT | 0      | 1 | 1 | 0 | 1    | 1     | 0     | 1         | AACTGAC      | 2          | 290471          |
| chrII  | 291715 | -      | chrII:291715:291771:-  | 1     | 0      | 0       | 0        | 1      | GTAAGT | 0      | 1 | 1 | 0 | 1    | 1     | 0     | 1         | AACTATC      | 2          | 291713          |
| chrII  | 306856 | -      | chrII:306856:306902:-  | 1     | 0      | 0       | 0        | 2      | GTATCA | 0      | 0 | 0 | 0 | 0    | 0     | 0     | 0         | TACTGAC      | 1          | 306858          |
| chrII  | 306858 | -      | chrII:306858:306902:-  | 0     | 1      | 0       | 0        | 2      | GTATCA | 0      | 1 | 0 | 0 | 0    | 0     | 0     | 0         | TACTGAC      | 1          | 306858          |
| chrII  | 331390 | -      | chrII:331390:331438:-  | 1     | 0      | 0       | 0        | 1      | GTATGA | 0      | 0 | 0 | 0 | 0    | 0     | 0     | 0         | TACTAAT      | 1          | 331392          |
| chrII  | 331392 | -      | chrII:331392:331438:-  | 0     | 1      | 0       | 0        | 1      | GTATGA | 0      | 1 | 1 | 0 | 1    | 1     | 0     | 1         | TACTAAT      | 1          | 331392          |
| chrII  | 333365 | +      | chrII:333319:333365:+  | 1     | 1      | 1       | 0        | 2      | GTAGGA | 1      | 0 | 0 | 0 | 0    | 0     | 0     | 0         | TACTAAC      | 0          | 333365          |
| chrII  | 341037 | -      | chrII:341037:341094:-  | 1     | 0      | 0       | 0        | 0      | GTATGT | 0      | 0 | 0 | 0 | 0    | 0     | 0     | 0         | GACTAAC      | 1          | 341039          |
| chrII  | 341039 | -      | chrII:341039:341094:-  | 0     | 1      | 0       | 0        | 0      | GTATGT | 0      | 1 | 1 | 0 | 1    | 1     | 0     | 1         | GACTAAC      | 1          | 341039          |
| chrII  | 342755 | +      | chrII:342697:342755:+  | 1     | 0      | 0       | 0        | 1      | GTGTGT | 0      | 0 | 0 | 0 | 0    | 0     | 0     | 0         | TATTAAC      | 1          | 342757          |
| chrII  | 342757 | +      | chrII:342697:342757:+  | 0     | 1      | 0       | 0        | 1      | GTGTGT | 0      | 1 | 1 | 0 | 1    | 1     | 0     | 1         | TATTAAC      | 1          | 342757          |
| chrII  | 366534 | -      | chrII:366534:366582:-  | 1     | 1      | 1       | 1        | 1      | 0      | GTATGT | 1 | 0 | 0 | 0    | 0     | 0     | 0         | AACTAAC      | 1          | 366534          |
| chrII  | 372031 | +      | chrII:371971:372031:+  | 0     | 1      | 0       | 0        | 2      | GAACGT | 0      | 1 | 0 | 0 | 0    | 0     | 0     | 0         | AACTAAC      | 1          | 372031          |
| chrII  | 407047 | -      | chrII:407047:407116:-  | 1     | 1      | 1       | 1        | 1      | 0      | GTATGT | 1 | 0 | 0 | 0    | 0     | 0     | 0         | TACTAAC      | 0          | 407047          |
| chrII  | 419960 | +      | chrII:419915:419960:+  | 0     | 1      | 0       | 0        | 2      | TTATGG | 0      | 1 | 0 | 0 | 0    | 0     | 0     | 0         | GACTAAC      | 1          | 419960          |
| chrII  | 425496 | -      | chrII:425496:425538:-  | 0     | 1      | 0       | 0        | 2      | CTAAGT | 0      | 1 | 0 | 0 | 0    | 0     | 0     | 0         | CATTAAC      | 2          | 425496          |
| chrII  | 426524 | -      | chrII:426524:426624:-  | 0     | 1      | 1       | 0        | 1      | GTAAGT | 1      | 0 | 0 | 0 | 0    | 0     | 0     | 0         | TACTAAC      | 0          | 426524          |
| chrII  | 431595 | -      | chrII:431595:431650:-  | 0     | 1      | 0       | 0        | 1      | GTAGGT | 0      | 1 | 1 | 0 | 1    | 1     | 0     | 1         | TACTGAC      | 1          | 431595          |
| chrII  | 443735 | -      | chrII:443735:443827:-  | 1     | 1      | 0       | 0        | 0      | GTATGT | 0      | 1 | 1 | 0 | 1    | 1     | 0     | 1         | TATTAAC      | 1          | 443735          |
| chrII  | 462255 | +      | chrII:462204:462255:+  | 1     | 1      | 1       | 1        | 1      | 1      | GTATGA | 1 | 0 | 0 | 0    | 0     | 0     | 0         | TACTGAC      | 1          | 462255          |
| chrII  | 462472 | +      | chrII:462424:462472:+  | 1     | 1      | 1       | 1        | 1      | 0      | GTATGT | 1 | 0 | 0 | 0    | 0     | 0     | 0         | TACTAAC      | 0          | 462472          |
| chrII  | 479389 | +      | chrII:479340:479389:+  | 1     | 1      | 1       | 1        | 1      | 0      | GTATGT | 1 | 0 | 0 | 0    | 0     | 0     | 0         | TACTAAC      | 0          | 479389          |
| chrII  | 519068 | -      | chrII:519068:519131:-  | 0     | 1      | 0       | 0        | 1      | GTAAGT | 0      | 1 | 1 | 0 | 1    | 1     | 0     | 1         | TACTAAC      | 0          | 519068          |
| chrII  | 592709 | -      | chrII:592709:592763:-  | 1     | 0      | 0       | 1        | 0      | GTATGT | 0      | 1 | 1 | 1 | 1    | 0     | 0     | 0         | CGCTAAC      | 2          | 592712          |
| chrII  | 602175 | +      | chrII:602099:602175:+  | 1     | 1      | 1       | 1        | 1      | 0      | GTATGT | 1 | 0 | 0 | 0    | 0     | 0     | 0         | CACTAAC      | 1          | 602175          |
| chrII  | 606346 | +      | chrII:606276:606346:+  | 1     | 0      | 0       | 1        | 0      | GTATGT | 0      | 1 | 1 | 0 | 1    | 1     | 0     | 1         | TCGTCAAC     | 3          | 606344          |
| chrII  | 606615 | +      | chrII:606567:606615:+  | 1     | 1      | 1       | 1        | 0      | TTATGT | 1      | 0 | 0 | 0 | 0    | 0     | 0     | 0         | TACTAAC      | 0          | 606615          |
| chrII  | 643000 | -      | chrII:643000:643073:-  | 1     | 0      | 0       | 0        | 3      | GCTCGT | 0      | 1 | 0 | 0 | 0    | 0     | 0     | 0         | TGCGAGC      | 3          | 643004          |
| chrII  | 653429 | +      | chrII:653364:653429:+  | 1     | 1      | 1       | 1        | 1      | 0      | GTATGT | 1 | 0 | 0 | 0    | 0     | 0     | 0         | GATTAAC      | 2          | 653429          |
| chrII  | 679973 | -      | chrII:679973:680034:-  | 1     | 1      | 1       | 1        | 1      | 0      | GTATGT | 1 | 0 | 0 | 0    | 0     | 0     | 0         | GACTAAC      | 1          | 679973          |
| chrII  | 726947 | -      | chrII:726947:727006:-  | 1     | 1      | 1       | 1        | 1      | 0      | GTATGT | 1 | 0 | 0 | 0    | 0     | 0     | 0         | CGCTAAC      | 2          | 726947          |
| chrII  | 756983 | -      | chrII:756983:757037:-  | 0     | 1      | 0       | 0        | 1      | GTAGGT | 0      | 1 | 1 | 0 | 1    | 1     | 0     | 1         | AACTAAC      | 1          | 756983          |
| chrII  | 792452 | -      | chrII:792452:792495:-  | 0     | 1      | 0       | 0        | 2      | GTAAGT | 0      | 1 | 0 | 0 | 0    | 0     | 0     | 0         | TATTAAC      | 1          | 792452          |
| chrIII | 17807  | +      | chrIII:17761:17807:+   | 0     | 1      | 0       | 0        | 2      | GTAGGC | 0      | 1 | 0 | 0 | 0    | 0     | 0     | 0         | AACTAAC      | 1          | 17807           |
| chrIII | 27690  | -      | chrIII:27690:27745:-   | 0     | 1      | 0       | 0        | 3      | GTAATG | 0      | 1 | 0 | 0 | 0    | 0     | 0     | 0         | TACTAAC      | 0          | 27690           |
| chrIII | 42034  | +      | chrIII:41999:42034:+   | 1     | 0      | 0       | 0        | 3      | CTAATT | 0      | 1 | 0 | 0 | 0    | 0     | 0     | 0         | TATAAAA      | 3          | 42034           |
| chrIII | 84710  | +      | chrIII:84665:84710:+   | 0     | 1      | 0       | 0        | 1      | GTCTGT | 0      | 1 | 1 | 0 | 1    | 1     | 0     | 1         | TTCTAAC      | 1          | 84710           |
| chrIII | 101646 | -      | chrIII:101646:101700:- | 1     | 1      | 1       | 1        | 1      | 0      | GTATGT | 1 | 0 | 0 | 0    | 0     | 0     | 0         | TACTAAC      | 0          | 101646          |
| chrIII | 107089 | +      | chrIII:107034:107089:+ | 1     | 1      | 1       | 1        | 1      | 0      | GTATGT | 1 | 0 | 0 | 0    | 0     | 0     | 0         | TACTAAC      | 0          | 107089          |
| chrIII | 107255 | +      | chrIII:107192:107255:+ | 1     | 1      | 1       | 1        | 1      | 0      | GTATGT | 1 | 0 | 0 | 0    | 0     | 0     | 0         | TACTAAC      | 0          | 107255          |
| chrIII | 111588 | -      | chrIII:111588:111632:- | 1     | 1      | 1       | 1        | 1      | 1      | GTATGC | 1 | 0 | 0 | 0    | 0     | 0     | 0         | GACTAAC      | 1          | 111588          |
| chrIII | 119535 | -      | chrIII:119535:119586:- | 0     | 1      | 0       | 0        | 3      | GTACTG | 0      | 1 | 0 | 0 | 0    | 0     | 0     | 0         | TACTAAC      | 0          | 119535          |
| chrIII | 120380 | +      | chrIII:120290:120380:+ | 0     | 1      | 0       | 0        | 1      | GTAAGT | 0      | 1 | 1 | 0 | 1    | 1     | 0     | 1         | TACTAAC      | 0          | 120380          |
| chrIII | 123571 | -      | chrIII:123571:123637:- | 1     | 0      | 0       | 0        | 3      | GTCTAG | 0      | 1 | 0 | 0 | 0    | 0     | 0     | 0         | TTTTTAC      | 3          | 123563          |
| chrIII | 169190 | -      | chrIII:169190:169268:- | 0     | 1      | 0       | 0        | 1      | GTATAT | 0      | 1 | 1 | 0 | 1    |       |       |           |              |            |                 |

|        |         |   |                        |   |   |   |   |   |        |   |   |   |   |   |   |         |   |         |
|--------|---------|---|------------------------|---|---|---|---|---|--------|---|---|---|---|---|---|---------|---|---------|
| chrIII | 228657  | + | chrIII:228610:228657+  | 0 | 1 | 0 | 0 | 1 | GTATGA | 0 | 1 | 1 | 0 | 1 | 0 | AACTAAC | 1 | 228657  |
| chrIII | 290581  | + | chrIII:290522:290581+  | 0 | 1 | 0 | 0 | 1 | GTATTT | 0 | 1 | 1 | 0 | 1 | 0 | AACTAAC | 1 | 290581  |
| chrIV  | 22303   | - | chrIV:22303:22355-     | 1 | 0 | 0 | 0 | 1 | GTAAGT | 0 | 1 | 1 | 0 | 1 | 0 | AGCTAAC | 2 | 22303   |
| chrIV  | 65358   | + | chrIV:65308:65358+     | 1 | 1 | 1 | 1 | 0 | GTATGT | 1 | 0 | 0 | 0 | 0 | 0 | TACTAAC | 0 | 65358   |
| chrIV  | 104616  | + | chrIV:104542:104616+   | 0 | 1 | 0 | 0 | 1 | GTATGA | 0 | 1 | 1 | 0 | 1 | 0 | TATTAAC | 1 | 104616  |
| chrIV  | 107156  | + | chrIV:107107:107156+   | 1 | 0 | 0 | 0 | 1 | GTAGGT | 0 | 1 | 1 | 1 | 0 | 0 | TACTCAC | 1 | 107159  |
| chrIV  | 122157  | + | chrIV:122079:122157+   | 1 | 0 | 0 | 1 | 0 | GTATGT | 0 | 0 | 0 | 0 | 0 | 0 | TACTAAC | 0 | 122160  |
| chrIV  | 122160  | + | chrIV:122079:122160+   | 0 | 1 | 0 | 1 | 0 | GTATGT | 0 | 1 | 1 | 0 | 1 | 0 | TACTAAC | 0 | 122160  |
| chrIV  | 130286  | - | chrIV:130286:130359-   | 0 | 1 | 0 | 0 | 2 | GTATCG | 0 | 1 | 0 | 0 | 0 | 0 | TACTAAT | 1 | 130286  |
| chrIV  | 130329  | + | chrIV:130289:130329+   | 0 | 1 | 0 | 0 | 1 | GTATGC | 0 | 1 | 1 | 0 | 1 | 0 | AACTAAC | 1 | 130329  |
| chrIV  | 188134  | - | chrIV:188134:188194-   | 0 | 1 | 0 | 0 | 1 | GTATGA | 0 | 1 | 1 | 0 | 1 | 0 | TATTAAC | 1 | 188134  |
| chrIV  | 217970  | + | chrIV:217907:217970+   | 0 | 1 | 1 | 0 | 2 | GTATTA | 1 | 0 | 0 | 0 | 0 | 0 | TACTAAC | 0 | 217970  |
| chrIV  | 230262  | + | chrIV:230202:230262+   | 0 | 1 | 1 | 0 | 1 | GTATTT | 1 | 0 | 0 | 0 | 0 | 0 | TACTAAC | 0 | 230262  |
| chrIV  | 232835  | + | chrIV:232747:232835+   | 1 | 0 | 0 | 0 | 1 | GTATAT | 0 | 0 | 0 | 0 | 0 | 0 | CACTGAC | 2 | 232838  |
| chrIV  | 232838  | + | chrIV:232747:232838+   | 0 | 1 | 0 | 0 | 1 | GTATAT | 0 | 1 | 1 | 0 | 1 | 0 | CACTGAC | 2 | 232838  |
| chrIV  | 235105  | + | chrIV:235039:235105+   | 1 | 0 | 0 | 0 | 1 | GTATGA | 0 | 0 | 0 | 0 | 0 | 0 | TTCTAAC | 1 | 235108  |
| chrIV  | 235108  | + | chrIV:235039:235108+   | 0 | 1 | 0 | 0 | 1 | GTATGA | 0 | 1 | 1 | 0 | 1 | 1 | TTCTAAC | 1 | 235108  |
| chrIV  | 239421  | - | chrIV:239421:239509-   | 1 | 1 | 1 | 1 | 0 | GTATGT | 1 | 0 | 0 | 0 | 0 | 0 | TACTAAC | 0 | 239421  |
| chrIV  | 247246  | - | chrIV:247246:247300-   | 0 | 1 | 0 | 0 | 1 | GTATAT | 0 | 1 | 1 | 0 | 1 | 0 | TACTAAC | 0 | 247246  |
| chrIV  | 248591  | + | chrIV:248513:248591+   | 0 | 1 | 0 | 0 | 2 | GTCAGT | 0 | 1 | 0 | 0 | 0 | 0 | CACTAAC | 1 | 248591  |
| chrIV  | 254999  | - | chrIV:254999:255044-   | 1 | 1 | 1 | 1 | 0 | GTATGT | 1 | 0 | 0 | 0 | 0 | 0 | GACTAAC | 1 | 254999  |
| chrIV  | 267780  | + | chrIV:267726:267780+   | 1 | 1 | 1 | 1 | 0 | GTATGT | 1 | 0 | 0 | 0 | 0 | 0 | TACTAAC | 0 | 267780  |
| chrIV  | 268934  | - | chrIV:268934:269000-   | 1 | 1 | 0 | 0 | 1 | GTCAGT | 0 | 1 | 1 | 0 | 1 | 1 | TCTGAC  | 1 | 268934  |
| chrIV  | 273738  | + | chrIV:273662:273738+   | 0 | 1 | 0 | 0 | 2 | GTCCGT | 0 | 1 | 0 | 0 | 0 | 0 | CACTAAC | 1 | 273738  |
| chrIV  | 299960  | - | chrIV:299960:300001-   | 0 | 1 | 0 | 0 | 2 | GTTTGG | 0 | 1 | 0 | 0 | 0 | 0 | TACTAAC | 0 | 299960  |
| chrIV  | 307375  | - | chrIV:307375:307457-   | 0 | 1 | 1 | 0 | 2 | GGAAGT | 1 | 0 | 0 | 0 | 0 | 0 | TACTAAC | 0 | 307375  |
| chrIV  | 331276  | + | chrIV:331190:331276+   | 1 | 0 | 0 | 0 | 1 | GTAAGT | 0 | 0 | 0 | 0 | 0 | 0 | CACTAAC | 1 | 331278  |
| chrIV  | 331278  | + | chrIV:331190:331278+   | 0 | 1 | 0 | 0 | 1 | GTAAGT | 0 | 1 | 1 | 0 | 1 | 0 | CACTAAC | 1 | 331278  |
| chrIV  | 333710  | + | chrIV:333639:333710+   | 0 | 1 | 0 | 0 | 1 | GTATGC | 0 | 1 | 1 | 0 | 1 | 0 | TACTAAT | 1 | 333710  |
| chrIV  | 337596  | + | chrIV:337525:337596+   | 1 | 1 | 1 | 1 | 1 | GTAAGT | 1 | 0 | 0 | 0 | 0 | 0 | TACTAAC | 0 | 337596  |
| chrIV  | 381065  | - | chrIV:381065:381143-   | 0 | 1 | 0 | 0 | 1 | GTATCT | 0 | 1 | 1 | 0 | 1 | 0 | CACTAAC | 1 | 381065  |
| chrIV  | 392638  | + | chrIV:392591:392638+   | 1 | 0 | 0 | 0 | 0 | GTATGT | 0 | 1 | 1 | 1 | 0 | 0 | TACTAAA | 1 | 392642  |
| chrIV  | 392679  | + | chrIV:392591:392679+   | 1 | 0 | 0 | 0 | 0 | GTATGT | 0 | 0 | 0 | 0 | 0 | 0 | TATTAAC | 1 | 392682  |
| chrIV  | 392682  | + | chrIV:392591:392682+   | 0 | 1 | 0 | 0 | 0 | GTATGT | 0 | 1 | 1 | 0 | 1 | 0 | TATTAAC | 1 | 392682  |
| chrIV  | 399468  | + | chrIV:399360:399468+   | 1 | 1 | 1 | 1 | 0 | GTATGT | 1 | 0 | 0 | 0 | 0 | 0 | TACTAAC | 0 | 399468  |
| chrIV  | 431423  | - | chrIV:431423:431470-   | 1 | 1 | 1 | 1 | 1 | GTACGT | 1 | 0 | 0 | 0 | 0 | 0 | TACTAAC | 0 | 431423  |
| chrIV  | 437849  | + | chrIV:437796:437849+   | 1 | 0 | 0 | 0 | 4 | AAAGAT | 0 | 1 | 0 | 0 | 0 | 0 | TCGTCAT | 4 | 437854  |
| chrIV  | 438275  | + | chrIV:438208:438275+   | 1 | 0 | 0 | 0 | 1 | GTAAGT | 0 | 1 | 1 | 0 | 1 | 0 | CTCTAAC | 2 | 438277  |
| chrIV  | 451430  | - | chrIV:451430:451488-   | 1 | 0 | 0 | 0 | 1 | GTATGG | 0 | 1 | 1 | 0 | 1 | 0 | TGCTAAC | 1 | 451431  |
| chrIV  | 451996  | - | chrIV:451996:452077-   | 0 | 1 | 0 | 0 | 2 | GTCGGT | 0 | 1 | 0 | 0 | 0 | 0 | AACTAAC | 1 | 451996  |
| chrIV  | 456687  | - | chrIV:456687:456757-   | 1 | 0 | 0 | 0 | 1 | GTAAGT | 0 | 0 | 0 | 0 | 0 | 0 | TACTAAT | 1 | 456689  |
| chrIV  | 456689  | - | chrIV:456689:456757-   | 0 | 1 | 0 | 0 | 1 | GTAAGT | 0 | 1 | 1 | 0 | 1 | 0 | TACTAAT | 1 | 456689  |
| chrIV  | 458048  | - | chrIV:458048:458095-   | 1 | 1 | 1 | 1 | 0 | GTATGT | 1 | 0 | 0 | 0 | 0 | 0 | TACTAAC | 0 | 458048  |
| chrIV  | 491873  | + | chrIV:491792:491873+   | 0 | 1 | 1 | 0 | 3 | ATTTT  | 1 | 0 | 0 | 0 | 0 | 0 | TACTAAC | 0 | 491873  |
| chrIV  | 540580  | + | chrIV:540538:540580+   | 1 | 0 | 0 | 0 | 1 | GTAAGT | 0 | 0 | 0 | 0 | 0 | 0 | TACTAAT | 1 | 540586  |
| chrIV  | 540586  | + | chrIV:540538:540586+   | 0 | 1 | 0 | 0 | 1 | GTAAGT | 0 | 1 | 1 | 0 | 1 | 0 | TACTAAT | 1 | 540586  |
| chrIV  | 569665  | - | chrIV:569665:569722-   | 1 | 1 | 1 | 1 | 0 | GTATGT | 1 | 0 | 0 | 0 | 0 | 0 | TACTAAC | 0 | 569665  |
| chrIV  | 579963  | + | chrIV:579894:579963+   | 1 | 1 | 1 | 1 | 0 | GTATGG | 1 | 0 | 0 | 0 | 0 | 0 | TACTAAC | 0 | 579963  |
| chrIV  | 630016  | + | chrIV:629904:630016+   | 0 | 1 | 1 | 1 | 0 | GTATGT | 1 | 0 | 0 | 0 | 0 | 0 | TACTAAC | 0 | 630016  |
| chrIV  | 653424  | + | chrIV:653365:653424+   | 0 | 1 | 0 | 0 | 3 | TTACGA | 0 | 1 | 0 | 0 | 0 | 0 | TACTAAC | 0 | 653424  |
| chrIV  | 655244  | + | chrIV:655202:655244+   | 1 | 0 | 0 | 0 | 1 | GTATGC | 0 | 1 | 1 | 1 | 0 | 0 | TACTAAG | 1 | 655257  |
| chrIV  | 657891  | + | chrIV:657846:657891+   | 0 | 1 | 0 | 0 | 2 | GTATCA | 0 | 1 | 0 | 0 | 0 | 0 | AACTGAC | 2 | 657891  |
| chrIV  | 676355  | + | chrIV:676270:676355+   | 1 | 0 | 0 | 0 | 1 | GTACGT | 0 | 0 | 0 | 0 | 0 | 0 | AACTAAC | 1 | 676358  |
| chrIV  | 676358  | + | chrIV:676270:676358+   | 0 | 1 | 0 | 0 | 1 | GTACGT | 0 | 1 | 1 | 0 | 1 | 0 | AACTAAC | 1 | 676358  |
| chrIV  | 698042  | - | chrIV:698042:698092-   | 0 | 1 | 0 | 0 | 1 | GTACGT | 0 | 1 | 1 | 0 | 1 | 0 | TATTAAC | 1 | 698042  |
| chrIV  | 715265  | - | chrIV:715265:715356-   | 1 | 1 | 1 | 1 | 0 | GTATGT | 1 | 0 | 0 | 0 | 0 | 0 | TACTAAC | 0 | 715265  |
| chrIV  | 715306  | - | chrIV:715264:715306-   | 1 | 0 | 0 | 0 | 2 | GTAAGT | 0 | 1 | 0 | 0 | 0 | 0 | TTCTACC | 2 | 715298  |
| chrIV  | 721692  | - | chrIV:721692:721739-   | 0 | 1 | 0 | 0 | 1 | GTTTGT | 0 | 1 | 1 | 0 | 1 | 0 | TTCTAAC | 1 | 721692  |
| chrIV  | 733713  | - | chrIV:733713:733773-   | 1 | 1 | 1 | 1 | 0 | GTATGT | 1 | 0 | 0 | 0 | 0 | 0 | TACTAAC | 0 | 733713  |
| chrIV  | 768399  | - | chrIV:768399:768453-   | 1 | 0 | 0 | 0 | 1 | ATATGT | 0 | 0 | 0 | 0 | 0 | 0 | AACTAAC | 1 | 768401  |
| chrIV  | 768401  | - | chrIV:768401:768453-   | 0 | 1 | 0 | 0 | 1 | ATATGT | 0 | 1 | 1 | 0 | 1 | 0 | AACTAAC | 1 | 768401  |
| chrIV  | 885149  | + | chrIV:885101:885149+   | 0 | 1 | 0 | 0 | 2 | GTATCA | 0 | 1 | 0 | 0 | 0 | 0 | GACTAAC | 1 | 885149  |
| chrIV  | 929251  | + | chrIV:929206:929251+   | 1 | 0 | 0 | 0 | 1 | GTATGA | 0 | 0 | 0 | 0 | 0 | 0 | AACTAAC | 1 | 929254  |
| chrIV  | 929254  | + | chrIV:929206:929254+   | 0 | 1 | 0 | 0 | 1 | GTATGA | 0 | 1 | 1 | 0 | 1 | 0 | AACTAAC | 1 | 929254  |
| chrIV  | 992896  | + | chrIV:992862:992896+   | 1 | 0 | 0 | 0 | 4 | CCATCG | 0 | 1 | 0 | 0 | 0 | 0 | TGGCAG  | 3 | 992899  |
| chrIV  | 1021387 | + | chrIV:1021323:1021387+ | 0 | 1 | 0 | 0 | 1 | ATATGT | 0 | 1 | 1 | 0 | 1 | 0 | GACTAAC | 1 | 1021387 |
| chrIV  | 1073346 | - | chrIV:1073346:1073398- | 1 | 1 | 1 | 1 | 1 | GTATGC | 1 | 0 | 0 | 0 | 0 | 0 | TACTAAC | 0 | 1073346 |
| chrIV  | 1080239 | - | chrIV:1080239:1080322- | 0 | 1 | 0 | 0 | 1 | GTATAT | 0 | 1 | 1 | 0 | 1 | 0 | CACTAAC | 1 | 1080239 |
| chrIV  | 1081205 | + | chrIV:1081142:1081205+ | 0 | 1 | 0 | 0 | 1 | GTATGA | 0 | 1 | 1 | 0 | 1 | 0 | AAITAAC | 2 | 1081205 |
| chrIV  | 1103871 | + | chrIV:1103808:1103871+ | 1 | 1 | 1 | 1 | 0 | GTATGT | 1 | 0 | 0 | 0 | 0 | 0 | CACTAAC | 1 | 1103871 |
| chrIV  | 1111888 | + | chrIV:1111836:1111888+ | 0 | 1 | 0 | 0 | 0 | GTATGT | 0 | 1 | 1 | 0 | 1 | 0 | CACTAAC | 1 | 1111888 |
| chrIV  | 1114332 | + | chrIV:1114289:1114332+ | 1 | 0 | 0 | 0 | 0 | GTATGT | 0 | 0 | 0 | 0 | 0 | 0 | TACTAAC | 0 | 1114335 |
| chrIV  | 1114335 | + | chrIV:1114289:1114335+ | 0 | 1 | 0 | 0 | 0 | GTATGT | 0 | 1 | 1 | 0 | 1 | 1 | TACTAAC | 0 | 1114335 |
| chrIV  | 1145148 | + | chrIV:1145107:1145148+ | 1 | 0 | 0 | 0 | 1 | GTACGT | 0 | 1 | 1 | 1 | 0 | 0 | TGCTAAC | 1 | 1145151 |
| chrIV  | 1181081 | + | chrIV:1181036:1181081+ | 0 | 1 | 0 | 0 | 3 | AGATCT | 0 | 1 | 0 | 0 | 0 | 0 | CACTAAC | 1 | 1181081 |
| chrIV  | 1212941 | + | chrIV:1212871:1212941+ | 1 | 1 | 1 | 1 | 0 | GTATGT | 1 | 0 | 0 | 0 | 0 | 0 | TACTAAC | 0 | 1212941 |
| chrIV  | 1237581 | + | chrIV:1237527:1237581+ | 1 | 1 | 1 | 1 | 0 | GTTTGT | 1 | 0 | 0 | 0 | 0 | 0 | GACTAAC | 1 | 1237581 |
| chrIV  | 1238769 | - | chrIV:1238769:1238817- | 1 | 1 | 1 | 1 | 0 | GTATGT | 1 | 0 | 0 | 0 | 0 | 0 | AACTAAC | 1 | 1238769 |
| chrIV  | 1256999 | - | chrIV:1256999:1257056- | 1 | 0 | 0 | 0 | 4 | GCTTAG | 0 | 1 | 0 | 0 | 0 | 0 | TCCGAT  | 4 | 1257001 |
| chrIV  | 1266790 | - | chrIV:1266790:1266854- | 1 | 0 | 1 | 1 | 0 | GTATGT | 1 | 0 | 0 | 0 | 0 | 0 | TACTAAC | 0 | 1266790 |
| chrIV  | 1266846 | + | chrIV:1266789:1266846+ | 1 | 0 | 0 | 0 | 2 | GTTAGT | 0 | 0 | 0 | 0 | 0 | 0 | AACTAAC | 1 | 1266849 |
| chrIV  | 1266849 | + | chrIV:1266789:1266849+ | 0 | 1 | 0 | 0 | 2 | GTTAGT | 0 | 1 | 0 | 0 | 0 | 0 | AACTAAC | 1 | 1266849 |

|        |         |   |                         |   |   |   |   |   |        |   |   |   |   |   |   |         |   |         |
|--------|---------|---|-------------------------|---|---|---|---|---|--------|---|---|---|---|---|---|---------|---|---------|
| chrIV  | 1319627 | - | chrIV:1319627:1319690:- | 1 | 1 | 1 | 1 | 0 | GTATGT | 1 | 0 | 0 | 0 | 0 | 0 | TACTAAC | 0 | 1319627 |
| chrIV  | 1319751 | - | chrIV:1319751:1319809:- | 1 | 1 | 1 | 1 | 0 | GTATGT | 1 | 0 | 0 | 0 | 0 | 0 | TACTAAC | 0 | 1319751 |
| chrIV  | 1333317 | - | chrIV:1333317:1333401:- | 0 | 1 | 0 | 0 | 1 | GTATGC | 0 | 1 | 1 | 0 | 1 | 0 | TACTAAT | 1 | 1333317 |
| chrIV  | 1355141 | - | chrIV:1355141:1355228:- | 0 | 1 | 0 | 0 | 3 | GTAGAG | 0 | 1 | 0 | 0 | 0 | 0 | AACTAAC | 1 | 1355141 |
| chrIV  | 1407178 | + | chrIV:1407133:1407178:+ | 0 | 1 | 0 | 0 | 2 | GTATAC | 0 | 1 | 0 | 0 | 0 | 0 | TACTAAC | 0 | 1407178 |
| chrIV  | 1411915 | - | chrIV:1411915:1411963:- | 1 | 1 | 0 | 0 | 2 | ACATGT | 0 | 1 | 0 | 0 | 0 | 0 | GACTAAC | 1 | 1411915 |
| chrIV  | 1450485 | - | chrIV:1450485:1450533:- | 1 | 1 | 1 | 0 | 3 | GTTGGT | 1 | 0 | 0 | 0 | 0 | 0 | TACTAAC | 0 | 1450485 |
| chrIV  | 1453413 | + | chrIV:1453370:1453413:+ | 0 | 1 | 0 | 0 | 2 | GTTGGT | 0 | 1 | 0 | 0 | 0 | 0 | TACTAAC | 0 | 1453413 |
| chrIV  | 1490516 | - | chrIV:1490516:1490571:- | 1 | 0 | 0 | 0 | 0 | GTATGT | 0 | 0 | 0 | 0 | 0 | 0 | GACTAAC | 1 | 1490516 |
| chrIV  | 1490518 | - | chrIV:1490518:1490571:- | 0 | 1 | 0 | 0 | 0 | GTATGT | 0 | 1 | 1 | 0 | 1 | 1 | GACTAAC | 1 | 1490518 |
| chrIV  | 1519506 | - | chrIV:1519506:1519576:- | 0 | 1 | 0 | 0 | 1 | GTATGC | 0 | 1 | 1 | 0 | 1 | 1 | GACTAAC | 1 | 1519506 |
| chrV   | 7558    | - | chrV:7558:7625:-        | 0 | 1 | 0 | 0 | 2 | GTATAA | 0 | 1 | 0 | 0 | 0 | 0 | TACTAAC | 0 | 7558    |
| chrV   | 61195   | + | chrV:61112:61195:+      | 0 | 1 | 0 | 0 | 1 | GTACGT | 0 | 1 | 1 | 0 | 1 | 0 | TACTAAT | 1 | 61195   |
| chrV   | 124639  | - | chrV:124639:124687:-    | 0 | 1 | 0 | 0 | 0 | GTATGT | 0 | 1 | 1 | 0 | 1 | 0 | AACTAAC | 1 | 124639  |
| chrV   | 131853  | + | chrV:131777:131853:+    | 1 | 1 | 1 | 1 | 0 | GTATGT | 1 | 0 | 0 | 0 | 0 | 0 | CACTAAC | 1 | 131853  |
| chrV   | 148254  | + | chrV:148194:148254:+    | 1 | 1 | 1 | 1 | 1 | GTATGC | 1 | 0 | 0 | 0 | 0 | 0 | TACTAAC | 0 | 148254  |
| chrV   | 151105  | + | chrV:151038:151105:+    | 1 | 0 | 0 | 0 | 0 | GTATGT | 0 | 1 | 1 | 1 | 0 | 0 | TACTAAC | 1 | 151105  |
| chrV   | 159013  | - | chrV:159013:159086:-    | 1 | 1 | 1 | 1 | 0 | GTATGT | 1 | 0 | 0 | 0 | 0 | 0 | AACTAAC | 1 | 159013  |
| chrV   | 160515  | + | chrV:160465:160515:+    | 0 | 1 | 0 | 0 | 1 | GTATAT | 0 | 1 | 1 | 0 | 1 | 0 | ATCTAAC | 2 | 160515  |
| chrV   | 166786  | - | chrV:166786:166873:-    | 1 | 1 | 1 | 1 | 0 | GTATGT | 1 | 0 | 0 | 0 | 0 | 0 | TACTAAC | 0 | 166786  |
| chrV   | 166806  | - | chrV:166806:166873:-    | 1 | 0 | 0 | 1 | 0 | GTATGT | 0 | 1 | 1 | 0 | 1 | 0 | TTTTGAC | 3 | 166806  |
| chrV   | 201996  | + | chrV:201953:201996:+    | 1 | 0 | 0 | 0 | 0 | GTATGT | 0 | 0 | 0 | 0 | 0 | 0 | TACTGAC | 1 | 201996  |
| chrV   | 201998  | + | chrV:201953:201998:+    | 0 | 1 | 0 | 0 | 0 | GTATGT | 0 | 1 | 1 | 0 | 1 | 1 | TACTGAC | 1 | 201998  |
| chrV   | 203929  | + | chrV:203855:203929:+    | 0 | 1 | 0 | 0 | 1 | GTATGG | 0 | 1 | 1 | 0 | 1 | 0 | TATTAAC | 1 | 203929  |
| chrV   | 239667  | - | chrV:239667:239710:-    | 0 | 1 | 1 | 1 | 1 | GTACGT | 1 | 0 | 0 | 0 | 0 | 0 | TACTAAC | 0 | 239667  |
| chrV   | 258656  | + | chrV:258593:258656:+    | 1 | 0 | 0 | 0 | 2 | GTAGGA | 0 | 0 | 0 | 0 | 0 | 0 | TACTAAC | 0 | 258656  |
| chrV   | 258658  | + | chrV:258593:258658:+    | 0 | 1 | 0 | 0 | 2 | GTAGGA | 0 | 1 | 0 | 0 | 0 | 0 | TACTAAC | 0 | 258658  |
| chrV   | 269803  | - | chrV:269803:269865:-    | 0 | 1 | 1 | 0 | 3 | GTTGTA | 1 | 0 | 0 | 0 | 0 | 0 | TACTAAC | 0 | 269803  |
| chrV   | 292572  | - | chrV:292572:292618:-    | 1 | 1 | 0 | 0 | 2 | GTACAT | 0 | 1 | 0 | 0 | 0 | 0 | TACTAAC | 0 | 292572  |
| chrV   | 305682  | + | chrV:305624:305682:+    | 1 | 0 | 0 | 0 | 0 | GTATGT | 0 | 0 | 0 | 0 | 0 | 0 | ATCTAAC | 2 | 305682  |
| chrV   | 305685  | + | chrV:305624:305685:+    | 0 | 1 | 0 | 0 | 0 | GTATGT | 0 | 1 | 1 | 0 | 1 | 0 | ATCTAAC | 2 | 305685  |
| chrV   | 307801  | + | chrV:307743:307801:+    | 1 | 1 | 1 | 1 | 0 | GTATGT | 1 | 0 | 0 | 0 | 0 | 0 | TACTAAC | 0 | 307801  |
| chrV   | 308040  | + | chrV:307953:308040:+    | 1 | 1 | 1 | 1 | 0 | GTATGT | 1 | 0 | 0 | 0 | 0 | 0 | TACTAAC | 0 | 308040  |
| chrV   | 336934  | + | chrV:336866:336934:+    | 1 | 0 | 0 | 0 | 1 | GTATGA | 0 | 0 | 0 | 0 | 0 | 0 | TACTAAC | 0 | 336934  |
| chrV   | 336937  | + | chrV:336866:336937:+    | 0 | 1 | 0 | 0 | 1 | GTATGA | 0 | 1 | 1 | 0 | 1 | 0 | TACTAAC | 0 | 336937  |
| chrV   | 348217  | - | chrV:348217:348272:-    | 1 | 1 | 1 | 1 | 0 | GTATGT | 1 | 0 | 0 | 0 | 0 | 0 | TACTAAC | 0 | 348217  |
| chrV   | 362828  | + | chrV:362729:362828:+    | 1 | 0 | 0 | 1 | 0 | GTATGT | 0 | 0 | 0 | 0 | 0 | 0 | TTCTAAC | 1 | 362828  |
| chrV   | 362831  | + | chrV:362729:362831:+    | 0 | 1 | 0 | 1 | 0 | GTATGT | 0 | 1 | 1 | 0 | 1 | 0 | TTCTAAC | 1 | 362831  |
| chrV   | 374670  | - | chrV:374670:374721:-    | 1 | 0 | 0 | 0 | 1 | GTTTGT | 0 | 0 | 0 | 0 | 0 | 0 | GACTGAC | 2 | 374670  |
| chrV   | 374672  | - | chrV:374672:374721:-    | 0 | 1 | 0 | 0 | 1 | GTTTGT | 0 | 1 | 1 | 0 | 1 | 1 | GACTGAC | 2 | 374672  |
| chrV   | 397225  | + | chrV:397147:397225:+    | 0 | 1 | 1 | 0 | 3 | TGTTGT | 1 | 0 | 0 | 0 | 0 | 0 | TACTAAC | 0 | 397225  |
| chrV   | 423912  | + | chrV:423821:423912:+    | 1 | 0 | 0 | 0 | 3 | GTAGAG | 0 | 0 | 0 | 0 | 0 | 0 | TACTAAC | 0 | 423912  |
| chrV   | 423914  | + | chrV:423821:423914:+    | 0 | 1 | 0 | 0 | 3 | GTAGAG | 0 | 1 | 0 | 0 | 0 | 0 | TACTAAC | 0 | 423914  |
| chrV   | 433162  | + | chrV:433110:433162:+    | 0 | 1 | 1 | 0 | 3 | TTCTCT | 1 | 0 | 0 | 0 | 0 | 0 | TACTAAC | 0 | 433162  |
| chrV   | 435438  | - | chrV:435438:435498:-    | 0 | 1 | 0 | 0 | 2 | GTAAT  | 0 | 1 | 0 | 0 | 0 | 0 | AACTAAC | 1 | 435438  |
| chrV   | 487860  | + | chrV:487816:487860:+    | 0 | 1 | 0 | 0 | 1 | GTATGA | 0 | 1 | 1 | 0 | 1 | 0 | TACTAAC | 0 | 487860  |
| chrV   | 517899  | + | chrV:517847:517899:+    | 1 | 0 | 0 | 0 | 0 | GTATGT | 0 | 0 | 0 | 0 | 0 | 0 | TACTAAC | 0 | 517899  |
| chrV   | 517902  | + | chrV:517847:517902:+    | 0 | 1 | 0 | 0 | 0 | GTATGT | 0 | 1 | 1 | 0 | 1 | 0 | TACTAAC | 0 | 517902  |
| chrV   | 540383  | - | chrV:540383:540436:-    | 1 | 0 | 0 | 0 | 0 | GTATGT | 0 | 1 | 1 | 0 | 1 | 0 | TTCTAAC | 1 | 540383  |
| chrV   | 548611  | + | chrV:548548:548611:+    | 1 | 1 | 1 | 1 | 0 | GTATGT | 1 | 0 | 0 | 0 | 0 | 0 | TACTAAC | 0 | 548611  |
| chrV   | 561246  | + | chrV:561200:561246:+    | 0 | 1 | 0 | 0 | 0 | GTATGT | 0 | 1 | 1 | 0 | 1 | 0 | CACTAAC | 1 | 561246  |
| chrVI  | 32029   | - | chrVI:32029:32077:-     | 0 | 1 | 0 | 0 | 1 | GTAAGT | 0 | 1 | 1 | 0 | 1 | 0 | AACTAAC | 1 | 32029   |
| chrVI  | 63915   | - | chrVI:63915:63972:-     | 1 | 1 | 1 | 1 | 0 | GTATGT | 1 | 0 | 0 | 0 | 0 | 0 | TACTAAC | 0 | 63915   |
| chrVI  | 64615   | - | chrVI:64615:64682:-     | 0 | 1 | 1 | 0 | 4 | GCAGTA | 1 | 0 | 0 | 0 | 0 | 0 | TACTAAC | 0 | 64615   |
| chrVI  | 96257   | + | chrVI:96184:96257:+     | 1 | 0 | 0 | 0 | 1 | GTATTT | 0 | 0 | 0 | 0 | 0 | 0 | TTCTAAC | 1 | 96257   |
| chrVI  | 96259   | + | chrVI:96184:96259:+     | 0 | 1 | 0 | 0 | 1 | GTATTT | 0 | 1 | 1 | 0 | 1 | 0 | TTCTAAC | 1 | 96259   |
| chrVI  | 103131  | - | chrVI:103131:103173:-   | 0 | 1 | 0 | 0 | 2 | TTTTGT | 0 | 1 | 0 | 0 | 0 | 0 | TACTAAC | 0 | 103131  |
| chrVI  | 109970  | - | chrVI:109970:110026:-   | 0 | 1 | 0 | 0 | 1 | GTAAGT | 0 | 1 | 1 | 0 | 1 | 0 | GATTAAC | 2 | 109970  |
| chrVI  | 131143  | - | chrVI:131143:131201:-   | 0 | 1 | 0 | 0 | 2 | GTTAGT | 0 | 1 | 0 | 0 | 0 | 0 | GACTAAT | 2 | 131143  |
| chrVI  | 137939  | + | chrVI:137848:137939:+   | 0 | 1 | 0 | 0 | 4 | ATGGAT | 0 | 1 | 0 | 0 | 0 | 0 | TACTAAC | 0 | 137939  |
| chrVI  | 176326  | - | chrVI:176326:176385:-   | 1 | 0 | 0 | 0 | 1 | GTATGG | 0 | 0 | 0 | 0 | 0 | 0 | AACTAAC | 1 | 176326  |
| chrVI  | 176328  | - | chrVI:176328:176385:-   | 0 | 1 | 0 | 0 | 1 | GTATGG | 0 | 1 | 1 | 0 | 1 | 1 | AACTAAC | 1 | 176328  |
| chrVI  | 203304  | - | chrVI:203304:203374:-   | 1 | 1 | 1 | 1 | 0 | GTATGT | 1 | 0 | 0 | 0 | 0 | 0 | TACTAAC | 0 | 203304  |
| chrVI  | 221291  | - | chrVI:221291:221402:-   | 1 | 1 | 1 | 1 | 0 | GTATGT | 1 | 0 | 0 | 0 | 0 | 0 | TACTAAC | 0 | 221291  |
| chrVI  | 242044  | + | chrVI:241997:242044:+   | 1 | 1 | 1 | 1 | 1 | GTAAGT | 1 | 0 | 0 | 0 | 0 | 0 | TATTAAC | 1 | 242044  |
| chrVI  | 268723  | + | chrVI:268674:268723:+   | 0 | 1 | 0 | 0 | 1 | GTATGC | 0 | 1 | 1 | 0 | 1 | 0 | CACTAAC | 1 | 268723  |
| chrVII | 16567   | + | chrVII:16513:16567:+    | 0 | 1 | 0 | 0 | 4 | ATTAAT | 0 | 1 | 0 | 0 | 0 | 0 | TACTGAC | 1 | 16567   |
| chrVII | 34394   | - | chrVII:34394:34444:-    | 0 | 1 | 0 | 0 | 4 | ACCGGT | 0 | 1 | 0 | 0 | 0 | 0 | GACTAAC | 1 | 34394   |
| chrVII | 35284   | - | chrVII:35284:35351:-    | 1 | 0 | 0 | 0 | 2 | GTAAGG | 0 | 0 | 0 | 0 | 0 | 0 | TACTAAC | 0 | 35284   |
| chrVII | 35288   | - | chrVII:35288:35351:-    | 0 | 1 | 0 | 0 | 2 | GTAAGG | 0 | 1 | 0 | 0 | 0 | 0 | TACTAAC | 0 | 35288   |
| chrVII | 51959   | + | chrVII:51882:51959:+    | 0 | 1 | 0 | 0 | 0 | GTATGT | 0 | 1 | 1 | 0 | 1 | 0 | TATTGAC | 2 | 51959   |
| chrVII | 59557   | + | chrVII:59483:59557:+    | 0 | 1 | 0 | 0 | 1 | GTATGG | 0 | 1 | 1 | 0 | 1 | 0 | AACTAAT | 2 | 59557   |
| chrVII | 62173   | + | chrVII:62132:62173:+    | 1 | 1 | 1 | 1 | 0 | GTATGT | 1 | 0 | 0 | 0 | 0 | 0 | TACTAAC | 0 | 62173   |
| chrVII | 73034   | - | chrVII:73034:73136:-    | 1 | 1 | 1 | 1 | 1 | GTACGT | 1 | 0 | 0 | 0 | 0 | 0 | TACTAAC | 0 | 73034   |
| chrVII | 77521   | + | chrVII:77467:77521:+    | 0 | 1 | 0 | 0 | 2 | GTATCA | 0 | 1 | 0 | 0 | 0 | 0 | AACTAAC | 1 | 77521   |
| chrVII | 140634  | + | chrVII:140554:140634:+  | 0 | 1 | 0 | 0 | 1 | GTATCT | 0 | 1 | 1 | 0 | 1 | 0 | ATCTAAC | 2 | 140634  |
| chrVII | 143935  | - | chrVII:143935:143984:-  | 1 | 0 | 0 | 0 | 0 | GTATGT | 0 | 1 | 1 | 0 | 1 | 0 | TACTAAC | 1 | 143935  |
| chrVII | 148658  | - | chrVII:148658:148721:-  | 1 | 0 | 0 | 0 | 2 | TTACGT | 0 | 0 | 0 | 0 | 0 | 0 | TACTAAC | 0 | 148658  |
| chrVII | 148660  | - | chrVII:148660:148721:-  | 0 | 1 | 0 | 0 | 2 | TTACGT | 0 | 1 | 0 | 0 | 0 | 0 | TACTAAC | 0 | 148660  |
| chrVII | 157245  | - | chrVII:157245:157288:-  | 1 | 1 | 1 | 1 | 0 | GTATGT | 1 | 0 | 0 | 0 | 0 | 0 | CACTAAC | 1 | 157245  |
| chrVII | 166587  | + | chrVII:166543:166587:+  | 0 | 1 | 0 | 0 | 3 | ATAGGC | 0 | 1 | 0 | 0 | 0 | 0 | TACTGAC | 1 | 166587  |
| chrVII | 167428  | + | chrVII:167361:167428:+  | 1 | 0 | 0 | 1 | 0 | GTATGT | 0 | 0 | 0 | 0 | 0 | 0 | TTCTAAC | 1 | 167428  |

|         |         |   |                          |   |   |   |   |   |        |   |   |   |   |   |   |          |   |         |
|---------|---------|---|--------------------------|---|---|---|---|---|--------|---|---|---|---|---|---|----------|---|---------|
| chrVII  | 167431  | + | chrVII:167361:167431:+   | 0 | 1 | 0 | 1 | 0 | GTATGT | 0 | 1 | 1 | 0 | 1 | 0 | TTCTAAC  | 1 | 167431  |
| chrVII  | 188026  | - | chrVII:188026:188070:-   | 0 | 1 | 0 | 0 | 3 | GTACCG | 0 | 1 | 0 | 0 | 0 | 0 | TACTAAC  | 0 | 188026  |
| chrVII  | 253204  | - | chrVII:253204:253253:-   | 1 | 0 | 0 | 0 | 1 | GTATGA | 0 | 0 | 0 | 0 | 0 | 0 | TACTAAT  | 1 | 253206  |
| chrVII  | 253206  | - | chrVII:253206:253253:-   | 0 | 1 | 0 | 0 | 1 | GTATGA | 0 | 1 | 1 | 0 | 1 | 1 | TACTAAT  | 1 | 253206  |
| chrVII  | 262617  | - | chrVII:262617:262696:-   | 0 | 1 | 0 | 0 | 0 | GTATGT | 0 | 1 | 1 | 0 | 1 | 0 | CACTAAC  | 1 | 262617  |
| chrVII  | 293423  | + | chrVII:293335:293423:+   | 0 | 1 | 0 | 0 | 1 | GTATTT | 0 | 1 | 1 | 0 | 1 | 0 | GACTAAC  | 1 | 293423  |
| chrVII  | 293818  | + | chrVII:293737:293818:+   | 0 | 1 | 0 | 0 | 1 | GTATGG | 0 | 1 | 1 | 0 | 1 | 0 | TACTAAC  | 0 | 293818  |
| chrVII  | 311486  | + | chrVII:311402:311486:+   | 0 | 1 | 1 | 0 | 2 | GGTTGT | 1 | 0 | 0 | 0 | 0 | 0 | TACTAAC  | 0 | 311486  |
| chrVII  | 314263  | - | chrVII:314263:314298:-   | 0 | 1 | 0 | 0 | 2 | ATATAT | 0 | 1 | 0 | 0 | 0 | 0 | TACTGAC  | 1 | 314263  |
| chrVII  | 345544  | - | chrVII:345544:345614:-   | 0 | 1 | 0 | 0 | 0 | GTATGT | 0 | 1 | 1 | 0 | 1 | 0 | TACTAAT  | 1 | 345544  |
| chrVII  | 346854  | - | chrVII:346854:346896:-   | 1 | 1 | 1 | 1 | 0 | GTATGT | 1 | 0 | 0 | 0 | 0 | 0 | TACTAAC  | 0 | 346854  |
| chrVII  | 380661  | - | chrVII:380661:380732:-   | 0 | 1 | 0 | 0 | 1 | GTATTT | 0 | 1 | 1 | 0 | 1 | 0 | TATTGAC  | 2 | 380661  |
| chrVII  | 383552  | + | chrVII:383489:383552:+   | 1 | 0 | 0 | 0 | 0 | GTATGT | 0 | 0 | 0 | 0 | 0 | 0 | TATTAAC  | 1 | 383555  |
| chrVII  | 383555  | + | chrVII:383489:383555:+   | 0 | 1 | 0 | 0 | 0 | GTATGT | 0 | 1 | 1 | 0 | 1 | 0 | TATTAAC  | 1 | 383555  |
| chrVII  | 414314  | + | chrVII:414250:414314:+   | 0 | 1 | 0 | 0 | 1 | GTATGG | 0 | 1 | 1 | 0 | 1 | 0 | AACTAAC  | 1 | 414314  |
| chrVII  | 423868  | - | chrVII:423868:423911:-   | 0 | 1 | 0 | 0 | 1 | GTATGA | 0 | 1 | 1 | 0 | 1 | 0 | AACTAAC  | 1 | 423868  |
| chrVII  | 427173  | - | chrVII:427173:427221:-   | 0 | 1 | 0 | 0 | 0 | GTATGT | 0 | 1 | 1 | 0 | 1 | 0 | TATTAAC  | 1 | 427173  |
| chrVII  | 435728  | + | chrVII:435686:435728:+   | 0 | 1 | 1 | 0 | 2 | TTAAGT | 1 | 0 | 0 | 0 | 0 | 0 | TACTAAC  | 0 | 435728  |
| chrVII  | 436362  | + | chrVII:436318:436362:+   | 1 | 0 | 0 | 0 | 0 | GTATGT | 0 | 0 | 0 | 0 | 0 | 0 | TACTAAC  | 0 | 436365  |
| chrVII  | 436365  | + | chrVII:436318:436365:+   | 0 | 1 | 0 | 0 | 0 | GTATGT | 0 | 1 | 1 | 0 | 1 | 0 | TACTAAC  | 0 | 436365  |
| chrVII  | 439462  | + | chrVII:439387:439462:+   | 1 | 0 | 0 | 0 | 1 | GTAAGT | 0 | 1 | 1 | 1 | 0 | 0 | CGCTAAC  | 2 | 439465  |
| chrVII  | 443013  | - | chrVII:443013:443066:-   | 1 | 1 | 0 | 0 | 2 | GTCAGT | 0 | 1 | 0 | 0 | 0 | 0 | TACTGAC  | 1 | 443013  |
| chrVII  | 472352  | - | chrVII:472352:472397:-   | 1 | 0 | 0 | 0 | 2 | GTGAGT | 0 | 1 | 0 | 0 | 0 | 0 | TGCTAAC  | 1 | 472354  |
| chrVII  | 497394  | - | chrVII:497394:497462:-   | 1 | 1 | 1 | 1 | 0 | GTATGT | 1 | 0 | 0 | 0 | 0 | 0 | TACTAAC  | 0 | 497394  |
| chrVII  | 497408  | - | chrVII:497408:497462:-   | 1 | 0 | 0 | 1 | 0 | GTATGT | 0 | 1 | 1 | 1 | 0 | 0 | TACTAAC  | 0 | 497394  |
| chrVII  | 497961  | - | chrVII:497961:498003:-   | 1 | 0 | 1 | 1 | 1 | GTAAGT | 1 | 0 | 0 | 0 | 0 | 0 | TACTAAC  | 0 | 497961  |
| chrVII  | 504218  | - | chrVII:504218:504268:-   | 0 | 1 | 0 | 0 | 1 | GTATGA | 0 | 1 | 1 | 0 | 1 | 0 | TTCTAAC  | 1 | 504218  |
| chrVII  | 543691  | + | chrVII:543643:543691:+   | 1 | 0 | 0 | 1 | 0 | GTATGT | 0 | 1 | 1 | 1 | 0 | 0 | TCCAATC  | 3 | 543686  |
| chrVII  | 543708  | + | chrVII:543643:543708:+   | 1 | 1 | 1 | 1 | 0 | GTATGT | 1 | 0 | 0 | 0 | 0 | 0 | TATTAAC  | 1 | 543708  |
| chrVII  | 555885  | + | chrVII:555835:555885:+   | 1 | 0 | 0 | 1 | 0 | GTATGT | 0 | 1 | 1 | 1 | 0 | 0 | CACGAAA  | 3 | 555891  |
| chrVII  | 556282  | + | chrVII:556232:556282:+   | 1 | 1 | 1 | 0 | 3 | GTGGAT | 1 | 0 | 0 | 0 | 0 | 0 | TACTAAC  | 0 | 556282  |
| chrVII  | 561204  | - | chrVII:561204:561267:-   | 1 | 0 | 0 | 0 | 2 | GGTTGT | 0 | 0 | 0 | 0 | 0 | 0 | TACTAAC  | 0 | 561206  |
| chrVII  | 561206  | - | chrVII:561206:561267:-   | 0 | 1 | 0 | 0 | 2 | GGTTGT | 0 | 1 | 0 | 0 | 0 | 0 | TACTAAC  | 0 | 561206  |
| chrVII  | 574775  | + | chrVII:574705:574775:+   | 1 | 0 | 0 | 0 | 1 | GTATTT | 0 | 0 | 0 | 0 | 0 | 0 | TACTAAC  | 0 | 574778  |
| chrVII  | 574778  | + | chrVII:574705:574778:+   | 0 | 1 | 0 | 0 | 1 | GTATTT | 0 | 1 | 1 | 0 | 1 | 0 | TACTAAC  | 0 | 574778  |
| chrVII  | 593473  | + | chrVII:593395:593473:+   | 0 | 1 | 0 | 0 | 1 | GTAAGT | 0 | 1 | 1 | 0 | 1 | 0 | TACTGAC  | 1 | 593473  |
| chrVII  | 594137  | - | chrVII:594137:594202:-   | 1 | 0 | 0 | 0 | 0 | GTATGT | 0 | 0 | 0 | 0 | 0 | 0 | TACTAAC  | 0 | 594141  |
| chrVII  | 594141  | - | chrVII:594141:594202:-   | 0 | 1 | 0 | 0 | 0 | GTATGT | 0 | 1 | 1 | 0 | 1 | 0 | TACTAAC  | 0 | 594141  |
| chrVII  | 607019  | - | chrVII:607019:607091:-   | 0 | 1 | 0 | 0 | 1 | GTATGG | 0 | 1 | 1 | 0 | 1 | 0 | AACTAAC  | 4 | 607019  |
| chrVII  | 627186  | - | chrVII:627186:627225:-   | 1 | 0 | 0 | 0 | 4 | AACTGA | 0 | 1 | 0 | 0 | 0 | 0 | AAGAAAT  | 4 | 627187  |
| chrVII  | 658297  | + | chrVII:658204:658297:+   | 0 | 1 | 0 | 0 | 1 | GTTTGT | 0 | 1 | 1 | 0 | 1 | 0 | TACTAAC  | 0 | 658297  |
| chrVII  | 682970  | - | chrVII:682970:683069:-   | 0 | 1 | 0 | 0 | 0 | GTATGT | 0 | 1 | 1 | 0 | 1 | 0 | TTCTAAC  | 1 | 682970  |
| chrVII  | 700757  | + | chrVII:700717:700757:+   | 1 | 0 | 0 | 0 | 4 | TCCTGA | 0 | 1 | 0 | 0 | 0 | 0 | TATCAAT  | 3 | 700761  |
| chrVII  | 730064  | + | chrVII:730017:730064:+   | 0 | 1 | 0 | 0 | 1 | GTATGG | 0 | 1 | 1 | 0 | 1 | 0 | GACTAAT  | 2 | 730064  |
| chrVII  | 772105  | + | chrVII:772019:772105:+   | 0 | 1 | 0 | 0 | 0 | GTATGT | 0 | 1 | 1 | 0 | 1 | 1 | TACTGAC  | 1 | 772105  |
| chrVII  | 792328  | - | chrVII:792328:792385:-   | 0 | 1 | 0 | 0 | 1 | GTATCT | 0 | 1 | 1 | 0 | 1 | 0 | TACTAAC  | 0 | 792328  |
| chrVII  | 859434  | - | chrVII:859434:859478:-   | 1 | 0 | 0 | 1 | 0 | GTATGT | 0 | 1 | 1 | 0 | 1 | 0 | TAAAAAT  | 3 | 859434  |
| chrVII  | 875661  | + | chrVII:875581:875661:+   | 0 | 1 | 0 | 0 | 1 | GCATGT | 0 | 1 | 1 | 0 | 1 | 0 | ATCTAAC  | 2 | 875661  |
| chrVII  | 878176  | - | chrVII:878176:878242:-   | 0 | 1 | 0 | 0 | 3 | TTAAGA | 0 | 1 | 0 | 0 | 0 | 0 | TACTAAC  | 0 | 878176  |
| chrVII  | 914791  | - | chrVII:914791:914879:-   | 0 | 1 | 0 | 0 | 1 | GTAAGT | 0 | 1 | 1 | 0 | 1 | 0 | AACTAAC  | 1 | 914791  |
| chrVII  | 937275  | + | chrVII:937216:937275:+   | 0 | 1 | 0 | 0 | 2 | GTAAGA | 0 | 1 | 0 | 0 | 0 | 0 | CACTAAC  | 1 | 937275  |
| chrVII  | 946407  | + | chrVII:946331:946407:+   | 1 | 1 | 1 | 1 | 1 | GTACGT | 1 | 0 | 0 | 0 | 0 | 0 | TACTAAC  | 0 | 946407  |
| chrVII  | 951679  | + | chrVII:951679:951729:+   | 0 | 1 | 0 | 0 | 2 | GTATAC | 0 | 1 | 0 | 0 | 0 | 0 | TACTAAT  | 1 | 951679  |
| chrVII  | 962304  | + | chrVII:962229:962304:+   | 0 | 1 | 0 | 0 | 0 | GTATGT | 0 | 1 | 1 | 0 | 1 | 0 | TACTAAC  | 0 | 962304  |
| chrVII  | 1002937 | + | chrVII:1002886:1002937:+ | 0 | 1 | 0 | 0 | 1 | GCATGT | 0 | 1 | 1 | 0 | 1 | 0 | TACTAAC  | 0 | 1002937 |
| chrVII  | 1017561 | - | chrVII:1017561:1017603:- | 0 | 1 | 0 | 0 | 5 | CCACCA | 0 | 1 | 0 | 0 | 0 | 0 | CACTAAC  | 1 | 1017561 |
| chrVII  | 1052639 | - | chrVII:1052639:1052724:- | 0 | 1 | 0 | 0 | 1 | GTATGG | 0 | 1 | 1 | 0 | 1 | 0 | TACTAAC  | 0 | 1052639 |
| chrVII  | 1083748 | - | chrVII:1083748:1083798:- | 0 | 1 | 0 | 0 | 2 | GTATAA | 0 | 1 | 0 | 0 | 0 | 0 | TACTAAC  | 0 | 1083748 |
| chrVIII | 97942   | - | chrVIII:97942:98036:-    | 0 | 1 | 0 | 0 | 1 | GTACGT | 0 | 1 | 1 | 0 | 1 | 0 | GACTAAT  | 2 | 97942   |
| chrVIII | 104751  | + | chrVIII:104684:104751:+  | 0 | 1 | 1 | 0 | 2 | ACATGT | 1 | 0 | 0 | 0 | 0 | 0 | TACTAAC  | 0 | 104751  |
| chrVIII | 107815  | + | chrVIII:107766:107815:+  | 0 | 1 | 0 | 0 | 2 | GCAAGT | 0 | 1 | 0 | 0 | 0 | 0 | AACTAAC  | 1 | 107815  |
| chrVIII | 107875  | + | chrVIII:107827:107875:+  | 1 | 1 | 1 | 1 | 1 | GTAAGT | 1 | 0 | 0 | 0 | 0 | 0 | TACTAAC  | 0 | 107875  |
| chrVIII | 115533  | + | chrVIII:115489:115533:+  | 0 | 1 | 0 | 0 | 2 | GATATA | 0 | 1 | 0 | 0 | 0 | 0 | TACTAAT  | 1 | 115533  |
| chrVIII | 129590  | + | chrVIII:129523:129590:+  | 1 | 0 | 0 | 1 | 0 | GTATGT | 0 | 1 | 1 | 1 | 0 | 0 | AACTTCC  | 3 | 129593  |
| chrVIII | 129611  | + | chrVIII:129523:129611:+  | 1 | 1 | 1 | 1 | 0 | GTATGT | 1 | 0 | 0 | 0 | 0 | 0 | TACTAAC  | 0 | 129611  |
| chrVIII | 138274  | - | chrVIII:138274:138323:-  | 0 | 1 | 1 | 0 | 1 | GTCTGT | 1 | 0 | 0 | 0 | 0 | 0 | TACTAAC  | 0 | 138274  |
| chrVIII | 148770  | - | chrVIII:148770:148814:-  | 1 | 1 | 0 | 0 | 1 | GTATGC | 0 | 1 | 1 | 0 | 1 | 0 | CATTAAC  | 2 | 148770  |
| chrVIII | 187613  | - | chrVIII:187613:187669:-  | 1 | 1 | 1 | 1 | 0 | GTATGT | 1 | 0 | 0 | 0 | 0 | 0 | TACTAAC  | 0 | 187613  |
| chrVIII | 189778  | - | chrVIII:189778:189843:-  | 1 | 1 | 1 | 1 | 0 | GTATGT | 1 | 0 | 0 | 0 | 0 | 0 | TGCTAAC  | 1 | 189778  |
| chrVIII | 189806  | - | chrVIII:189806:189844:-  | 1 | 0 | 0 | 0 | 4 | GCTGAT | 0 | 1 | 0 | 0 | 0 | 0 | TCGGAAAT | 4 | 189806  |
| chrVIII | 236985  | + | chrVIII:236958:236985:+  | 1 | 0 | 0 | 0 | 4 | TTAAAA | 0 | 1 | 0 | 0 | 0 | 0 | AAATAAA  | 3 | 236997  |
| chrVIII | 251233  | + | chrVIII:251158:251233:+  | 1 | 1 | 1 | 1 | 0 | GTATGT | 1 | 0 | 0 | 0 | 0 | 0 | GACTAAC  | 1 | 251233  |
| chrVIII | 255689  | - | chrVIII:255689:255752:-  | 1 | 1 | 1 | 1 | 0 | GTATGT | 1 | 0 | 0 | 0 | 0 | 0 | TACTAAC  | 0 | 255689  |
| chrVIII | 255706  | - | chrVIII:255706:255753:-  | 1 | 0 | 0 | 0 | 3 | GTCCAT | 0 | 1 | 0 | 0 | 0 | 0 | TTCTAAG  | 2 | 255702  |
| chrVIII | 262372  | - | chrVIII:262372:262442:-  | 0 | 1 | 1 | 1 | 0 | GTATGT | 1 | 0 | 0 | 0 | 0 | 0 | TATTAAC  | 1 | 262372  |
| chrVIII | 298418  | - | chrVIII:298418:298487:-  | 1 | 1 | 1 | 1 | 0 | GTATGT | 1 | 0 | 0 | 0 | 0 | 0 | TACTAAC  | 0 | 298418  |
| chrVIII | 315810  | - | chrVIII:315810:315861:-  | 1 | 1 | 1 | 1 | 0 | GTATGT | 1 | 0 | 0 | 0 | 0 | 0 | TACTAAC  | 0 | 315810  |
| chrVIII | 335608  | - | chrVIII:335608:335675:-  | 0 | 1 | 0 | 0 | 1 | GTACGT | 0 | 1 | 1 | 0 | 1 | 1 | TACTGAC  | 1 | 335608  |
| chrVIII | 354926  | + | chrVIII:354868:354926:+  | 1 | 1 | 1 | 1 | 0 | GTATGT | 1 | 0 | 0 | 0 | 0 | 0 | TACTAAC  | 0 | 354926  |
| chrVIII | 372284  | + | chrVIII:372191:372284:+  | 0 | 1 | 0 | 0 | 1 | GTTTGT | 0 | 1 | 1 | 0 | 1 | 0 | TACTAAC  | 0 | 372284  |
| chrVIII | 382356  | - | chrVIII:382356:382410:-  | 0 | 1 | 1 | 0 | 4 | ATACAA | 1 | 0 | 0 | 0 | 0 | 0 | TACTAAC  | 0 | 382356  |
| chrVIII | 400569  | - | chrVIII:400569:400651:-  | 0 | 1 | 0 | 0 | 0 | GTATGT | 0 | 1 | 1 | 0 | 1 | 0 | TACTGAC  | 1 | 400569  |

|         |        |   |                         |   |   |   |   |   |         |        |   |   |   |   |   |         |   |        |
|---------|--------|---|-------------------------|---|---|---|---|---|---------|--------|---|---|---|---|---|---------|---|--------|
| chrVIII | 406673 | - | chrVIII:406673:406756:- | 1 | 0 | 0 | 0 | 1 | GCATGT  | 0      | 1 | 1 | 0 | 1 | 0 | TACTAAC | 0 | 406673 |
| chrVIII | 442923 | + | chrVIII:442871:442923:+ | 0 | 1 | 0 | 0 | 1 | GTATAT  | 0      | 1 | 1 | 0 | 1 | 0 | TATTAAC | 1 | 442923 |
| chrVIII | 491867 | - | chrVIII:491867:491919:- | 0 | 1 | 0 | 0 | 0 | GTATGT  | 0      | 1 | 1 | 0 | 1 | 0 | TACTAAT | 1 | 491867 |
| chrVIII | 498731 | - | chrVIII:498731:498786:- | 1 | 1 | 1 | 1 | 0 | GTATGT  | 1      | 0 | 0 | 0 | 0 | 0 | TACTAAC | 0 | 498731 |
| chrVIII | 508825 | + | chrVIII:508795:508825:+ | 1 | 0 | 0 | 0 | 6 | CCGGCC  | 0      | 1 | 0 | 0 | 0 | 0 | TTCTCAA | 3 | 508825 |
| chrIX   | 40246  | + | chrIX:40178:40246:+     | 0 | 1 | 0 | 0 | 3 | TCAAGT  | 0      | 1 | 0 | 0 | 0 | 0 | TACTAAC | 0 | 40246  |
| chrIX   | 47743  | + | chrIX:47699:47743:+     | 1 | 1 | 1 | 1 | 1 | GTAAGT  | 1      | 0 | 0 | 0 | 0 | 0 | TACTAAC | 0 | 47743  |
| chrIX   | 54025  | + | chrIX:53941:54025:+     | 1 | 0 | 0 | 0 | 0 | GTATGT  | 0      | 0 | 0 | 0 | 0 | 0 | TTCTAAC | 1 | 54027  |
| chrIX   | 54027  | + | chrIX:53941:54027:+     | 0 | 1 | 0 | 0 | 0 | GTATGT  | 0      | 1 | 1 | 0 | 1 | 0 | TTCTAAC | 1 | 54027  |
| chrIX   | 127052 | - | chrIX:127052:127135:-   | 1 | 0 | 0 | 0 | 1 | GTATAT  | 0      | 0 | 0 | 0 | 0 | 0 | TATTAAC | 1 | 127054 |
| chrIX   | 127054 | - | chrIX:127054:127135:-   | 0 | 1 | 0 | 0 | 1 | GTATAT  | 0      | 1 | 1 | 0 | 1 | 0 | TATTAAC | 1 | 127054 |
| chrIX   | 128117 | + | chrIX:128061:128117:+   | 1 | 0 | 0 | 0 | 2 | TTTTGT  | 0      | 0 | 0 | 0 | 0 | 0 | TACTAAC | 0 | 128119 |
| chrIX   | 128119 | + | chrIX:128061:128119:+   | 0 | 1 | 0 | 0 | 2 | TTTTGT  | 0      | 1 | 0 | 0 | 0 | 0 | TACTAAC | 0 | 128119 |
| chrIX   | 134038 | + | chrIX:133971:134038:+   | 1 | 0 | 0 | 0 | 1 | GTAAGT  | 0      | 0 | 0 | 0 | 0 | 0 | CACTAAC | 1 | 134041 |
| chrIX   | 134041 | + | chrIX:133971:134041:+   | 0 | 1 | 0 | 0 | 1 | GTAAGT  | 0      | 1 | 1 | 0 | 1 | 0 | CACTAAC | 1 | 134041 |
| chrIX   | 155276 | + | chrIX:155220:155276:+   | 1 | 1 | 1 | 1 | 1 | GCATGT  | 1      | 0 | 0 | 0 | 0 | 0 | TACTAAC | 0 | 155276 |
| chrIX   | 155301 | + | chrIX:155220:155301:+   | 1 | 0 | 0 | 1 | 1 | GCATGT  | 0      | 1 | 1 | 1 | 0 | 0 | TACAAGC | 2 | 155293 |
| chrIX   | 166484 | + | chrIX:166432:166484:+   | 1 | 1 | 1 | 1 | 0 | GTATGT  | 1      | 0 | 0 | 0 | 0 | 0 | TATTAAC | 1 | 166484 |
| chrIX   | 166501 | + | chrIX:166432:166501:+   | 1 | 0 | 0 | 1 | 0 | GTATGT  | 0      | 1 | 1 | 0 | 1 | 0 | GAGTAT  | 3 | 166502 |
| chrIX   | 183435 | - | chrIX:183435:183500:-   | 1 | 0 | 0 | 0 | 4 | CCCAAGT | 0      | 1 | 0 | 0 | 0 | 0 | CACTAT  | 3 | 183433 |
| chrIX   | 225117 | + | chrIX:225035:225117:+   | 0 | 1 | 0 | 0 | 1 | GTATGA  | 0      | 1 | 1 | 0 | 1 | 0 | TACTAAC | 0 | 225117 |
| chrIX   | 225834 | - | chrIX:225834:225896:-   | 0 | 1 | 1 | 1 | 1 | GTATAT  | 1      | 0 | 0 | 0 | 0 | 0 | AACTAAC | 1 | 225834 |
| chrIX   | 232012 | - | chrIX:232012:232070:-   | 1 | 1 | 1 | 1 | 0 | 3       | GTACTG | 1 | 0 | 0 | 0 | 0 | TACTAAC | 0 | 232012 |
| chrIX   | 261764 | + | chrIX:261723:261764:+   | 1 | 0 | 0 | 0 | 1 | GTATGA  | 0      | 0 | 0 | 0 | 0 | 0 | TACTAAT | 1 | 261767 |
| chrIX   | 261767 | + | chrIX:261723:261767:+   | 0 | 1 | 0 | 0 | 1 | GTATGA  | 0      | 1 | 1 | 0 | 1 | 0 | TACTAAT | 1 | 261767 |
| chrIX   | 317136 | + | chrIX:317062:317136:+   | 1 | 1 | 1 | 0 | 2 | TTCTGT  | 1      | 0 | 0 | 0 | 0 | 0 | TACTAAC | 0 | 317136 |
| chrIX   | 317159 | + | chrIX:317107:317159:+   | 1 | 0 | 0 | 0 | 5 | ATGAAA  | 0      | 1 | 0 | 0 | 0 | 0 | TCCTCAT | 3 | 317160 |
| chrIX   | 334601 | - | chrIX:334601:334643:-   | 0 | 1 | 0 | 0 | 1 | GTTTGT  | 0      | 1 | 1 | 0 | 1 | 0 | TACTAAT | 1 | 334601 |
| chrIX   | 348380 | - | chrIX:348380:348491:-   | 0 | 1 | 1 | 1 | 1 | GTATGA  | 1      | 0 | 0 | 0 | 0 | 0 | TACTAAC | 0 | 348380 |
| chrIX   | 360695 | - | chrIX:360695:360737:-   | 0 | 1 | 0 | 0 | 1 | GCATGT  | 0      | 1 | 1 | 0 | 1 | 0 | TACTAAC | 0 | 360695 |
| chrIX   | 363684 | + | chrIX:363652:363684:+   | 1 | 0 | 0 | 0 | 4 | TAACGC  | 0      | 1 | 0 | 0 | 0 | 0 | TACTAAC | 0 | 363684 |
| chrIX   | 387166 | + | chrIX:387136:387166:+   | 1 | 0 | 0 | 0 | 5 | CAAACA  | 0      | 1 | 0 | 0 | 0 | 0 | AAAAAAA | 4 | 387166 |
| chrX    | 31819  | + | chrX:31768:31819:+      | 1 | 0 | 0 | 0 | 0 | GTATGT  | 0      | 0 | 0 | 0 | 0 | 0 | TATTAAC | 1 | 31821  |
| chrX    | 31821  | + | chrX:31768:31821:+      | 0 | 1 | 0 | 0 | 0 | GTATGT  | 0      | 1 | 1 | 0 | 1 | 0 | TATTAAC | 1 | 31821  |
| chrX    | 50351  | - | chrX:50351:50411:-      | 1 | 1 | 1 | 1 | 0 | GTATGT  | 1      | 0 | 0 | 0 | 0 | 0 | TACTAAC | 0 | 50351  |
| chrX    | 71474  | + | chrX:71426:71474:+      | 1 | 0 | 0 | 0 | 2 | GTTGGT  | 0      | 0 | 0 | 0 | 0 | 0 | TACTAAC | 0 | 71476  |
| chrX    | 71476  | + | chrX:71426:71476:+      | 0 | 1 | 0 | 0 | 2 | GTTGGT  | 0      | 1 | 0 | 0 | 0 | 0 | TACTAAC | 0 | 71476  |
| chrX    | 74178  | + | chrX:74112:74178:+      | 1 | 1 | 1 | 0 | 2 | GGTTGT  | 1      | 0 | 0 | 0 | 0 | 0 | TACTAAC | 0 | 74178  |
| chrX    | 76268  | + | chrX:76213:76268:+      | 0 | 1 | 1 | 0 | 2 | GTATGT  | 1      | 0 | 0 | 0 | 0 | 0 | TACTAAC | 0 | 76268  |
| chrX    | 119610 | - | chrX:119610:119650:-    | 0 | 1 | 0 | 0 | 3 | GAGTTT  | 0      | 1 | 0 | 0 | 0 | 0 | TACTAAC | 0 | 119610 |
| chrX    | 165023 | + | chrX:164962:165023:+    | 0 | 1 | 0 | 0 | 2 | GTGGGT  | 0      | 1 | 0 | 0 | 0 | 0 | CACTAAC | 1 | 165023 |
| chrX    | 172451 | - | chrX:172451:172499:-    | 1 | 1 | 0 | 0 | 4 | AGTTCT  | 0      | 1 | 0 | 0 | 0 | 0 | TACTAAC | 0 | 172451 |
| chrX    | 209416 | + | chrX:209358:209416:+    | 0 | 1 | 0 | 0 | 1 | GTATGG  | 0      | 1 | 1 | 0 | 1 | 0 | TACTAAC | 0 | 209416 |
| chrX    | 234005 | + | chrX:233962:234005:+    | 1 | 0 | 0 | 0 | 4 | CTGGCT  | 0      | 1 | 0 | 0 | 0 | 0 | TCCTGGC | 3 | 233999 |
| chrX    | 237006 | + | chrX:236962:237006:+    | 0 | 1 | 0 | 0 | 1 | GTATGC  | 0      | 1 | 1 | 0 | 1 | 1 | CACTGAC | 2 | 237006 |
| chrX    | 264006 | - | chrX:264006:264058:-    | 1 | 0 | 0 | 0 | 2 | GTGGCT  | 0      | 0 | 0 | 0 | 0 | 0 | TACTAAC | 0 | 264008 |
| chrX    | 264008 | - | chrX:264008:264058:-    | 0 | 1 | 0 | 0 | 2 | GTGGCT  | 0      | 1 | 0 | 0 | 0 | 0 | TACTAAC | 0 | 264008 |
| chrX    | 328113 | - | chrX:328113:328177:-    | 0 | 1 | 0 | 0 | 2 | GTAAGC  | 0      | 1 | 0 | 0 | 0 | 0 | TACTAAC | 0 | 328113 |
| chrX    | 345274 | + | chrX:345230:345274:+    | 0 | 1 | 0 | 0 | 3 | GTAGAG  | 0      | 1 | 0 | 0 | 0 | 0 | TACTAAC | 0 | 345274 |
| chrX    | 349226 | + | chrX:349181:349226:+    | 0 | 1 | 0 | 0 | 0 | GTATGT  | 0      | 1 | 1 | 0 | 1 | 0 | CATTAAC | 2 | 349226 |
| chrX    | 365853 | + | chrX:365780:365853:+    | 1 | 1 | 1 | 1 | 0 | GTATGT  | 1      | 0 | 0 | 0 | 0 | 0 | TACTAAC | 0 | 365854 |
| chrX    | 387380 | - | chrX:387380:387430:-    | 1 | 1 | 1 | 1 | 0 | GTATGT  | 1      | 0 | 0 | 0 | 0 | 0 | TACTGAC | 1 | 387381 |
| chrX    | 396512 | - | chrX:396512:396565:-    | 1 | 1 | 1 | 1 | 0 | GTATGT  | 1      | 0 | 0 | 0 | 0 | 0 | TACTAAC | 0 | 396513 |
| chrX    | 422629 | + | chrX:422549:422629:+    | 1 | 0 | 0 | 0 | 1 | GTATGA  | 0      | 0 | 0 | 0 | 0 | 0 | TACTAAT | 1 | 422632 |
| chrX    | 422632 | + | chrX:422549:422632:+    | 0 | 1 | 0 | 0 | 1 | GTATGA  | 0      | 1 | 1 | 0 | 1 | 1 | TACTAAT | 1 | 422632 |
| chrX    | 432390 | - | chrX:432390:432464:-    | 1 | 0 | 0 | 0 | 2 | GTATAC  | 0      | 0 | 0 | 0 | 0 | 0 | TACTAAC | 0 | 432392 |
| chrX    | 432392 | - | chrX:432392:432464:-    | 0 | 1 | 0 | 0 | 2 | GTATAC  | 0      | 1 | 0 | 0 | 0 | 0 | TACTAAC | 0 | 432392 |
| chrX    | 435281 | + | chrX:435222:435281:+    | 1 | 0 | 0 | 1 | 0 | GTATGT  | 0      | 1 | 1 | 0 | 1 | 0 | AAGTAAA | 3 | 435279 |
| chrX    | 435302 | + | chrX:435222:435302:+    | 1 | 1 | 1 | 1 | 0 | GTATGT  | 1      | 0 | 0 | 0 | 0 | 0 | TACTAAC | 0 | 435303 |
| chrX    | 455749 | + | chrX:455690:455749:+    | 0 | 1 | 0 | 0 | 1 | GTACGT  | 0      | 1 | 1 | 0 | 1 | 0 | TACTAAC | 0 | 455749 |
| chrX    | 469190 | - | chrX:469190:469256:-    | 1 | 1 | 1 | 1 | 2 | GTTTCG  | 1      | 0 | 0 | 0 | 0 | 0 | TACTAAC | 0 | 469191 |
| chrX    | 506240 | + | chrX:506193:506240:+    | 0 | 1 | 0 | 0 | 1 | GTATGA  | 0      | 1 | 1 | 0 | 1 | 0 | TTCTAAC | 1 | 506240 |
| chrX    | 517546 | - | chrX:517546:517607:-    | 1 | 1 | 0 | 0 | 2 | GTACGC  | 0      | 1 | 0 | 0 | 0 | 0 | AACTAAC | 1 | 517546 |
| chrX    | 526804 | - | chrX:526804:526879:-    | 0 | 1 | 0 | 0 | 2 | TAATGT  | 0      | 1 | 0 | 0 | 0 | 0 | TACTAAC | 0 | 526804 |
| chrX    | 535287 | - | chrX:535287:535343:-    | 0 | 1 | 0 | 0 | 1 | GTAAGT  | 0      | 1 | 1 | 0 | 1 | 0 | CACTAAC | 1 | 535287 |
| chrX    | 538617 | + | chrX:538579:538617:+    | 1 | 0 | 0 | 0 | 5 | TCCTAA  | 0      | 1 | 0 | 0 | 0 | 0 | TACGGAA | 3 | 538616 |
| chrX    | 570579 | - | chrX:570579:570633:-    | 1 | 0 | 0 | 0 | 3 | GTAGTC  | 0      | 0 | 0 | 0 | 0 | 0 | TACTAAC | 0 | 570581 |
| chrX    | 570581 | - | chrX:570581:570633:-    | 0 | 1 | 0 | 0 | 3 | GTAGTC  | 0      | 1 | 0 | 0 | 0 | 0 | TACTAAC | 0 | 570581 |
| chrX    | 608540 | + | chrX:608476:608540:+    | 0 | 1 | 1 | 0 | 1 | GTAGGT  | 1      | 0 | 0 | 0 | 0 | 0 | TACTAAC | 0 | 608541 |
| chrX    | 632997 | - | chrX:632997:633051:-    | 1 | 1 | 0 | 0 | 1 | GTATGC  | 0      | 1 | 1 | 0 | 1 | 1 | AACTAAC | 1 | 632997 |
| chrX    | 633065 | - | chrX:633065:633144:-    | 0 | 1 | 0 | 0 | 2 | GTAAGC  | 0      | 1 | 0 | 0 | 0 | 0 | TACTAAT | 1 | 633065 |
| chrX    | 649522 | - | chrX:649522:649569:-    | 0 | 1 | 0 | 0 | 1 | GCATGT  | 0      | 1 | 1 | 0 | 1 | 0 | TACTAAC | 0 | 649522 |
| chrX    | 702871 | - | chrX:702871:702937:-    | 0 | 1 | 1 | 0 | 1 | TTATGT  | 1      | 0 | 0 | 0 | 0 | 0 | TACTAAC | 0 | 702872 |
| chrX    | 712054 | - | chrX:712054:712106:-    | 0 | 1 | 0 | 0 | 1 | GTTTGT  | 0      | 1 | 1 | 0 | 1 | 0 | TATTAAC | 1 | 712054 |
| chrXI   | 38910  | + | chrXI:38829:38910:+     | 0 | 1 | 0 | 0 | 4 | AGATAG  | 0      | 1 | 0 | 0 | 0 | 0 | TACTGAC | 1 | 38910  |
| chrXI   | 67767  | - | chrXI:67767:67805:-     | 1 | 0 | 0 | 0 | 4 | GACTAA  | 0      | 1 | 0 | 0 | 0 | 0 | AAAAAAG | 4 | 67768  |
| chrXI   | 74700  | + | chrXI:74657:74700:+     | 1 | 0 | 0 | 0 | 4 | GCGACT  | 0      | 1 | 0 | 0 | 0 | 0 | TTTTAAC | 2 | 74713  |
| chrXI   | 83061  | + | chrXI:83004:83061:+     | 1 | 1 | 1 | 1 | 0 | GTATGT  | 1      | 0 | 0 | 0 | 0 | 0 | TACTAAC | 0 | 83061  |
| chrXI   | 93382  | - | chrXI:93382:93470:-     | 1 | 0 | 0 | 1 | 1 | GTACGT  | 0      | 0 | 0 | 0 | 0 | 0 | AACTAAC | 1 | 93385  |
| chrXI   | 93385  | - | chrXI:93385:93470:-     | 0 | 1 | 0 | 1 | 1 | GTACGT  | 0      | 1 | 1 | 0 | 1 | 0 | AACTAAC | 1 | 93385  |
| chrXI   | 94082  | - | chrXI:94082:94154:-     | 1 | 1 | 0 | 0 | 0 | GTATGT  | 0      | 1 | 1 | 0 | 1 | 0 | TACTAAC | 0 | 94082  |
| chrXI   | 96757  | + | chrXI:96692:96757:+     | 1 | 0 | 0 | 0 | 1 | GTAGGT  | 0      | 1 | 1 | 0 | 1 | 0 | AACTAAC | 2 | 96759  |

|        |        |   |                        |   |   |   |   |   |        |        |   |   |   |   |   |         |   |        |
|--------|--------|---|------------------------|---|---|---|---|---|--------|--------|---|---|---|---|---|---------|---|--------|
| chrXI  | 158627 | - | chrXI:158627:158679:-  | 0 | 1 | 0 | 0 | 1 | ATATGT | 0      | 1 | 1 | 0 | 1 | 0 | TACTAAC | 0 | 158627 |
| chrXI  | 166477 | + | chrXI:166405:166477:+  | 1 | 0 | 0 | 1 | 1 | GTACGT | 0      | 0 | 0 | 0 | 0 | 0 | TACTAAC | 0 | 166479 |
| chrXI  | 166479 | + | chrXI:166405:166479:+  | 0 | 1 | 0 | 1 | 1 | GTACGT | 0      | 1 | 1 | 0 | 1 | 0 | TACTAAC | 0 | 166479 |
| chrXI  | 166501 | + | chrXI:166452:166501:+  | 0 | 1 | 0 | 0 | 3 | GTACTC | 0      | 1 | 0 | 0 | 0 | 0 | AACTAAC | 1 | 166501 |
| chrXI  | 191090 | - | chrXI:191090:191173:-  | 1 | 0 | 0 | 0 | 1 | GTAAGT | 0      | 1 | 1 | 0 | 0 | 1 | AACTAAC | 2 | 191090 |
| chrXI  | 193009 | - | chrXI:193009:193071:-  | 1 | 0 | 0 | 0 | 0 | GTATGT | 0      | 0 | 0 | 0 | 0 | 0 | CACTAAC | 1 | 193011 |
| chrXI  | 193011 | - | chrXI:193011:193071:-  | 0 | 1 | 0 | 0 | 0 | GTATGT | 0      | 1 | 1 | 0 | 1 | 1 | CACTAAC | 1 | 193011 |
| chrXI  | 225773 | - | chrXI:225773:225852:-  | 1 | 0 | 0 | 0 | 1 | GTAAGT | 0      | 0 | 0 | 0 | 0 | 0 | TATTAAC | 1 | 225775 |
| chrXI  | 225775 | - | chrXI:225775:225852:-  | 0 | 1 | 0 | 0 | 1 | GTAAGT | 0      | 1 | 1 | 0 | 1 | 0 | TATTAAC | 1 | 225775 |
| chrXI  | 231493 | + | chrXI:231447:231493:+  | 1 | 1 | 0 | 0 | 1 | GTATGA | 0      | 1 | 1 | 0 | 1 | 0 | TATTAAC | 1 | 231493 |
| chrXI  | 262173 | + | chrXI:262138:262173:+  | 0 | 0 | 1 | 0 | 0 | 3      | AGAAGT | 0 | 1 | 0 | 0 | 0 | GACTAAC | 1 | 262173 |
| chrXI  | 272946 | - | chrXI:272946:272992:-  | 1 | 0 | 0 | 0 | 0 | GTATGT | 0      | 0 | 0 | 0 | 0 | 0 | TTCTAAC | 1 | 272948 |
| chrXI  | 272948 | - | chrXI:272948:272992:-  | 0 | 1 | 0 | 0 | 0 | GTATGT | 0      | 1 | 1 | 0 | 1 | 0 | TTCTAAC | 1 | 272948 |
| chrXI  | 283016 | + | chrXI:282962:283016:+  | 0 | 1 | 1 | 0 | 0 | 2      | GGAAGT | 1 | 0 | 0 | 0 | 0 | TACTAAC | 0 | 283016 |
| chrXI  | 285869 | + | chrXI:285816:285869:+  | 0 | 1 | 0 | 0 | 1 | GTATGA | 0      | 1 | 1 | 0 | 1 | 0 | TACTAAC | 0 | 285869 |
| chrXI  | 290611 | - | chrXI:290611:290705:-  | 1 | 1 | 0 | 0 | 1 | GTAGGT | 0      | 1 | 1 | 0 | 1 | 0 | TACTAAC | 0 | 290611 |
| chrXI  | 302664 | + | chrXI:302572:302664:+  | 1 | 0 | 0 | 0 | 4 | CTCAAT | 0      | 1 | 0 | 0 | 0 | 0 | TCTGTG  | 3 | 302659 |
| chrXI  | 313868 | + | chrXI:313796:313868:+  | 0 | 1 | 0 | 0 | 2 | GTAAGT | 0      | 1 | 0 | 0 | 0 | 0 | TACTAAC | 0 | 313868 |
| chrXI  | 408145 | + | chrXI:408101:408145:+  | 1 | 0 | 0 | 0 | 1 | GTAAGT | 0      | 0 | 0 | 0 | 0 | 0 | AACTAAC | 1 | 408147 |
| chrXI  | 408147 | + | chrXI:408101:408147:+  | 0 | 1 | 0 | 0 | 1 | GTAAGT | 0      | 1 | 1 | 0 | 1 | 0 | AACTAAC | 1 | 408147 |
| chrXI  | 430163 | - | chrXI:430163:430239:-  | 1 | 1 | 1 | 1 | 0 | GTATGT | 1      | 0 | 0 | 0 | 0 | 0 | TACTAAC | 0 | 430163 |
| chrXI  | 437526 | + | chrXI:437481:437526:+  | 1 | 1 | 1 | 1 | 0 | GTATGT | 1      | 0 | 0 | 0 | 0 | 0 | TACTAAC | 0 | 437526 |
| chrXI  | 446831 | - | chrXI:446831:446885:-  | 0 | 1 | 0 | 0 | 1 | GTATGC | 0      | 1 | 1 | 0 | 1 | 0 | GACTAAC | 1 | 446831 |
| chrXI  | 447376 | - | chrXI:447376:447453:-  | 1 | 1 | 1 | 1 | 0 | GTATGT | 1      | 0 | 0 | 0 | 0 | 0 | TACTAAC | 0 | 447376 |
| chrXI  | 449611 | - | chrXI:449611:449663:-  | 1 | 1 | 1 | 1 | 0 | GTATGT | 1      | 0 | 0 | 0 | 0 | 0 | TACTGAC | 1 | 449611 |
| chrXI  | 465718 | - | chrXI:465718:465764:-  | 0 | 1 | 0 | 0 | 2 | GTAGGA | 0      | 1 | 0 | 0 | 0 | 0 | TATTAAC | 1 | 465718 |
| chrXI  | 468921 | - | chrXI:468921:468975:-  | 1 | 0 | 0 | 0 | 1 | GTATGC | 0      | 1 | 1 | 0 | 1 | 0 | TGCTAAC | 1 | 468923 |
| chrXI  | 490069 | + | chrXI:489994:490069:+  | 1 | 0 | 0 | 0 | 0 | GTATGT | 0      | 0 | 0 | 0 | 0 | 0 | TACTTAT | 2 | 490067 |
| chrXI  | 490072 | + | chrXI:489994:490072:+  | 0 | 1 | 0 | 0 | 0 | GTATGT | 0      | 1 | 1 | 0 | 1 | 0 | ATCTAAC | 2 | 490072 |
| chrXI  | 552232 | + | chrXI:552176:552232:+  | 0 | 1 | 0 | 0 | 2 | GTAAGT | 1      | 0 | 0 | 0 | 0 | 0 | TACTAAC | 0 | 552232 |
| chrXI  | 618096 | - | chrXI:618096:618168:-  | 1 | 1 | 1 | 0 | 0 | 1      | GTATGT | 1 | 0 | 0 | 0 | 0 | TACTAAC | 0 | 618096 |
| chrXI  | 625594 | + | chrXI:625544:625594:+  | 1 | 1 | 1 | 1 | 1 | GTAAGT | 1      | 0 | 0 | 0 | 0 | 0 | TACTAAC | 0 | 625594 |
| chrXI  | 633805 | - | chrXI:633805:633874:-  | 0 | 1 | 0 | 0 | 1 | GTCTGT | 0      | 1 | 1 | 0 | 1 | 0 | TACTAAC | 0 | 633805 |
| chrXI  | 649450 | + | chrXI:649382:649450:+  | 0 | 1 | 0 | 0 | 1 | GTATGA | 0      | 1 | 1 | 0 | 1 | 0 | TACTAAC | 0 | 649450 |
| chrXII | 40353  | - | chrXII:40353:40399:-   | 1 | 1 | 1 | 1 | 1 | GTATGC | 1      | 0 | 0 | 0 | 0 | 0 | TACTAAC | 0 | 40353  |
| chrXII | 50295  | + | chrXII:50224:50295:+   | 1 | 0 | 0 | 0 | 0 | GTATGT | 0      | 0 | 0 | 0 | 0 | 0 | CATTAAC | 2 | 50298  |
| chrXII | 50298  | + | chrXII:50224:50298:+   | 0 | 1 | 0 | 0 | 0 | GTATGT | 0      | 1 | 1 | 0 | 1 | 0 | CATTAAC | 2 | 50298  |
| chrXII | 75836  | - | chrXII:75836:75882:-   | 0 | 1 | 0 | 0 | 3 | GTAAGT | 0      | 1 | 0 | 0 | 0 | 0 | TACTAAC | 0 | 75836  |
| chrXII | 83743  | - | chrXII:83743:83803:-   | 1 | 1 | 0 | 0 | 3 | GTGTTT | 0      | 1 | 0 | 0 | 0 | 0 | TACTAAC | 0 | 83743  |
| chrXII | 90639  | + | chrXII:90568:90639:+   | 0 | 1 | 0 | 0 | 1 | GTATGC | 0      | 1 | 1 | 0 | 1 | 0 | AACTAAC | 1 | 90639  |
| chrXII | 155740 | - | chrXII:155740:155813:- | 1 | 0 | 0 | 0 | 1 | GTAAGT | 0      | 0 | 0 | 0 | 0 | 0 | CACTAAC | 1 | 155742 |
| chrXII | 155742 | - | chrXII:155742:155813:- | 0 | 1 | 0 | 0 | 1 | GTAAGT | 0      | 1 | 1 | 0 | 1 | 0 | CACTAAC | 1 | 155742 |
| chrXII | 232371 | + | chrXII:232297:232371:+ | 0 | 1 | 0 | 0 | 1 | GTAAGT | 0      | 1 | 1 | 0 | 1 | 0 | AACTAAC | 2 | 232371 |
| chrXII | 242652 | + | chrXII:242595:242652:+ | 0 | 1 | 1 | 0 | 2 | GTACTT | 1      | 0 | 0 | 0 | 0 | 0 | TACTAAC | 0 | 242652 |
| chrXII | 250899 | - | chrXII:250899:250948:- | 1 | 1 | 1 | 1 | 1 | GTATGG | 1      | 0 | 0 | 0 | 0 | 0 | TACTAAC | 0 | 250899 |
| chrXII | 263540 | + | chrXII:263478:263540:+ | 0 | 1 | 1 | 0 | 4 | GCAGTA | 1      | 0 | 0 | 0 | 0 | 0 | TACTAAC | 0 | 263540 |
| chrXII | 286498 | - | chrXII:286498:286557:- | 1 | 1 | 1 | 1 | 0 | GTATGT | 1      | 0 | 0 | 0 | 0 | 0 | TACTAAC | 0 | 286498 |
| chrXII | 286519 | - | chrXII:286519:286557:- | 1 | 0 | 0 | 1 | 0 | GTATGT | 0      | 1 | 1 | 1 | 0 | 0 | TGCTAAC | 2 | 286516 |
| chrXII | 316898 | + | chrXII:316853:316898:+ | 0 | 1 | 0 | 0 | 1 | GTATGA | 0      | 1 | 1 | 0 | 1 | 0 | AACTAAC | 2 | 316898 |
| chrXII | 327295 | - | chrXII:327295:327400:- | 1 | 1 | 1 | 1 | 0 | GTATGT | 1      | 0 | 0 | 0 | 0 | 0 | GACTAAC | 1 | 327295 |
| chrXII | 327338 | - | chrXII:327338:327400:- | 1 | 0 | 0 | 0 | 4 | CCATTA | 0      | 1 | 0 | 0 | 0 | 0 | TGCTCAT | 3 | 327339 |
| chrXII | 331860 | - | chrXII:331860:331922:- | 0 | 1 | 0 | 0 | 0 | GTATGT | 0      | 1 | 1 | 0 | 1 | 0 | TACTGAC | 1 | 331860 |
| chrXII | 333653 | + | chrXII:333603:333653:+ | 0 | 1 | 0 | 0 | 3 | GTAAGT | 0      | 1 | 0 | 0 | 0 | 0 | TATTAAC | 1 | 333653 |
| chrXII | 366444 | + | chrXII:366367:366444:+ | 0 | 1 | 0 | 0 | 2 | GTATCG | 0      | 1 | 0 | 0 | 0 | 0 | AACTAAC | 1 | 366444 |
| chrXII | 380685 | + | chrXII:380627:380685:+ | 0 | 1 | 0 | 0 | 0 | GTATGT | 0      | 1 | 1 | 0 | 1 | 0 | TTCTAAC | 1 | 380685 |
| chrXII | 382367 | + | chrXII:382302:382367:+ | 0 | 1 | 0 | 0 | 0 | GTATGT | 0      | 1 | 1 | 0 | 1 | 1 | TATTAAC | 1 | 382367 |
| chrXII | 382387 | + | chrXII:382302:382387:+ | 1 | 0 | 0 | 0 | 0 | GTATGT | 0      | 1 | 1 | 0 | 1 | 1 | TACTTAC | 1 | 382389 |
| chrXII | 398583 | + | chrXII:398534:398583:+ | 1 | 1 | 1 | 1 | 0 | GTATGT | 1      | 0 | 0 | 0 | 0 | 0 | TACTAAC | 0 | 398583 |
| chrXII | 491543 | + | chrXII:491497:491543:+ | 1 | 0 | 0 | 0 | 1 | GTATAT | 0      | 0 | 0 | 0 | 0 | 0 | TATTAAC | 1 | 491546 |
| chrXII | 491546 | + | chrXII:491497:491546:+ | 0 | 1 | 0 | 0 | 1 | GTATAT | 0      | 1 | 1 | 0 | 1 | 0 | TATTAAC | 1 | 491546 |
| chrXII | 522714 | + | chrXII:522672:522714:+ | 1 | 0 | 0 | 1 | 0 | GTATGT | 0      | 0 | 0 | 0 | 0 | 0 | TATTGAC | 2 | 522716 |
| chrXII | 522716 | + | chrXII:522672:522716:+ | 0 | 1 | 0 | 1 | 0 | GTATGT | 0      | 1 | 1 | 0 | 1 | 0 | TATTGAC | 2 | 522716 |
| chrXII | 522984 | + | chrXII:522893:522984:+ | 0 | 1 | 1 | 0 | 1 | GTATGC | 1      | 0 | 0 | 0 | 0 | 0 | TACTAAC | 0 | 522984 |
| chrXII | 548706 | - | chrXII:548706:548765:- | 1 | 1 | 1 | 1 | 0 | GTATGT | 1      | 0 | 0 | 0 | 0 | 0 | GACTAAC | 1 | 548706 |
| chrXII | 564467 | - | chrXII:564467:564515:- | 1 | 1 | 1 | 1 | 1 | GTAAGT | 1      | 0 | 0 | 0 | 0 | 0 | GACTAAC | 1 | 564467 |
| chrXII | 605300 | - | chrXII:605300:605434:- | 1 | 0 | 0 | 0 | 3 | GCTCGT | 0      | 1 | 0 | 0 | 0 | 0 | CACTTTC | 3 | 605298 |
| chrXII | 609448 | - | chrXII:609448:609498:- | 1 | 1 | 0 | 0 | 1 | GTATGA | 0      | 1 | 1 | 0 | 1 | 0 | ATCTAAC | 2 | 609448 |
| chrXII | 694444 | + | chrXII:694385:694444:+ | 1 | 1 | 1 | 1 | 0 | GTATGT | 1      | 0 | 0 | 0 | 0 | 0 | TACTAAC | 0 | 694444 |
| chrXII | 744185 | + | chrXII:744185:744221:+ | 1 | 0 | 0 | 0 | 4 | ATAATC | 0      | 1 | 0 | 0 | 0 | 0 | TTCTCAT | 3 | 744189 |
| chrXII | 744219 | + | chrXII:744156:744219:+ | 1 | 1 | 1 | 1 | 1 | GTACGT | 1      | 0 | 0 | 0 | 0 | 0 | TACTAAC | 0 | 744219 |
| chrXII | 766086 | - | chrXII:766086:766129:- | 1 | 1 | 1 | 1 | 0 | GTATGT | 1      | 0 | 0 | 0 | 0 | 0 | AACTAAC | 1 | 766086 |
| chrXII | 766205 | - | chrXII:766205:766249:- | 1 | 1 | 1 | 1 | 0 | GTATGT | 1      | 0 | 0 | 0 | 0 | 0 | AACTAAC | 1 | 766205 |
| chrXII | 783406 | - | chrXII:783406:783492:- | 0 | 1 | 0 | 0 | 2 | TAATGT | 0      | 1 | 0 | 0 | 0 | 0 | TTCTAAC | 1 | 783406 |
| chrXII | 786667 | + | chrXII:786616:786667:+ | 1 | 1 | 1 | 1 | 0 | GTATGT | 1      | 0 | 0 | 0 | 0 | 0 | TACTAAC | 0 | 786667 |
| chrXII | 791912 | - | chrXII:791912:791964:- | 0 | 1 | 0 | 0 | 0 | GTATGT | 0      | 1 | 1 | 0 | 1 | 0 | TACTAAC | 1 | 791912 |
| chrXII | 818678 | + | chrXII:818645:818678:+ | 1 | 0 | 0 | 0 | 3 | GTGGCT | 0      | 1 | 0 | 0 | 0 | 0 | TTTTAAT | 3 | 818685 |
| chrXII | 823171 | + | chrXII:823108:823171:+ | 0 | 1 | 0 | 0 | 1 | GTAAGT | 0      | 1 | 1 | 0 | 1 | 0 | TATTAAC | 1 | 823171 |
| chrXII | 827562 | - | chrXII:827562:827606:- | 0 | 1 | 0 | 0 | 4 | CGACTT | 0      | 1 | 0 | 0 | 0 | 0 | GACTAAC | 0 | 827562 |
| chrXII | 857038 | + | chrXII:856988:857038:+ | 1 | 1 | 1 | 1 | 0 | GTAAGT | 1      | 0 | 0 | 0 | 0 | 0 | TACTAAC | 0 | 857038 |
| chrXII | 898621 | + | chrXII:898549:898621:+ | 1 | 0 | 0 | 0 | 2 | GTATAA | 0      | 0 | 0 | 0 | 0 | 0 | TACTAAC | 0 | 898624 |
| chrXII | 898624 | + | chrXII:898549:898624:+ | 0 | 1 | 0 | 0 | 2 | GTATAA | 0      | 1 | 0 | 0 | 0 | 0 | TACTAAC | 0 | 898624 |
| chrXII | 907076 | + | chrXII:907032:907076:+ | 0 | 1 | 0 | 0 | 3 | GTCAGG | 0      | 1 | 0 | 0 | 0 | 0 | AACTAAC | 1 | 907076 |

|         |         |   |                          |   |   |   |   |   |        |   |   |   |   |   |   |         |   |         |
|---------|---------|---|--------------------------|---|---|---|---|---|--------|---|---|---|---|---|---|---------|---|---------|
| chrXII  | 918955  | - | chrXII:918955:919021:-   | 0 | 1 | 0 | 0 | 1 | ATATGT | 0 | 1 | 1 | 0 | 1 | 0 | CACTAAC | 1 | 918955  |
| chrXII  | 928302  | - | chrXII:928302:928370:-   | 0 | 1 | 0 | 0 | 1 | GTATAT | 0 | 1 | 1 | 0 | 1 | 0 | TACTAAC | 0 | 928302  |
| chrXII  | 965103  | + | chrXII:965038:965103:+   | 0 | 1 | 0 | 0 | 1 | GTATAT | 0 | 1 | 1 | 0 | 1 | 0 | TACTAAC | 0 | 965103  |
| chrXII  | 982467  | - | chrXII:982467:982535:-   | 1 | 0 | 0 | 0 | 0 | GTATGT | 0 | 0 | 0 | 0 | 0 | 0 | GACTAAC | 1 | 982470  |
| chrXII  | 982470  | - | chrXII:982470:982535:-   | 0 | 1 | 0 | 0 | 0 | GTATGT | 0 | 1 | 1 | 0 | 1 | 1 | GACTAAC | 1 | 982470  |
| chrXII  | 987191  | + | chrXII:987139:987191:+   | 1 | 1 | 1 | 1 | 0 | GTATGT | 1 | 0 | 0 | 0 | 0 | 0 | TACTAAC | 0 | 987191  |
| chrXII  | 987202  | + | chrXII:987139:987202:+   | 1 | 0 | 0 | 1 | 0 | GTATGT | 0 | 0 | 0 | 0 | 0 | 0 | AACTAAC | 1 | 987204  |
| chrXII  | 987204  | + | chrXII:987139:987204:+   | 0 | 1 | 0 | 1 | 0 | GTATGT | 0 | 1 | 1 | 0 | 1 | 0 | AACTAAC | 1 | 987204  |
| chrXII  | 987241  | + | chrXII:987139:987241:+   | 0 | 1 | 0 | 1 | 0 | GTATGT | 0 | 1 | 1 | 0 | 1 | 0 | GTCTAAC | 2 | 987241  |
| chrXII  | 988410  | + | chrXII:988329:988410:+   | 0 | 1 | 0 | 0 | 2 | GTAAGC | 0 | 1 | 0 | 0 | 0 | 0 | TACTAAT | 1 | 988410  |
| chrXII  | 1024631 | + | chrXII:1024570:1024631:+ | 1 | 1 | 1 | 1 | 1 | GTAAGT | 1 | 0 | 0 | 0 | 0 | 0 | TACTAAT | 1 | 1024631 |
| chrXIII | 38610   | - | chrXIII:38610:38680:-    | 0 | 1 | 0 | 0 | 2 | GTATCG | 0 | 1 | 0 | 0 | 0 | 0 | TACTAAC | 0 | 38610   |
| chrXIII | 56619   | + | chrXIII:56557:56619:+    | 0 | 1 | 0 | 0 | 1 | GATATT | 0 | 1 | 1 | 0 | 1 | 0 | TATTAAC | 1 | 56619   |
| chrXIII | 82343   | + | chrXIII:82291:82343:+    | 1 | 1 | 1 | 1 | 0 | GTATGT | 1 | 0 | 0 | 0 | 0 | 0 | TACTAAC | 0 | 82343   |
| chrXIII | 99301   | - | chrXIII:99301:99375:-    | 1 | 1 | 1 | 1 | 0 | GTATGT | 1 | 0 | 0 | 0 | 0 | 0 | TACTAAC | 0 | 99301   |
| chrXIII | 112661  | - | chrXIII:112661:112715:-  | 0 | 1 | 0 | 0 | 1 | GTATGA | 0 | 1 | 1 | 0 | 1 | 0 | GACTAAC | 1 | 112661  |
| chrXIII | 114129  | - | chrXIII:114129:114189:-  | 0 | 1 | 0 | 0 | 3 | TTAAGA | 0 | 1 | 0 | 0 | 0 | 0 | TACTAAC | 0 | 114129  |
| chrXIII | 123777  | - | chrXIII:123777:123824:-  | 1 | 0 | 1 | 0 | 3 | ATCTCT | 1 | 0 | 0 | 0 | 0 | 0 | TACTAAC | 0 | 123777  |
| chrXIII | 140113  | - | chrXIII:140113:140183:-  | 1 | 1 | 1 | 1 | 0 | GTATGT | 1 | 0 | 0 | 0 | 0 | 0 | CACTAAC | 1 | 140113  |
| chrXIII | 182669  | + | chrXIII:182594:182669:+  | 1 | 0 | 0 | 0 | 0 | GTATGT | 0 | 1 | 1 | 1 | 0 | 0 | TACTAAA | 1 | 182675  |
| chrXIII | 204537  | - | chrXIII:204537:204588:-  | 0 | 1 | 0 | 0 | 1 | GTATGA | 0 | 1 | 1 | 0 | 1 | 0 | TACTAAC | 0 | 204537  |
| chrXIII | 206162  | + | chrXIII:206098:206162:+  | 1 | 1 | 1 | 1 | 0 | GTATGT | 1 | 0 | 0 | 0 | 0 | 0 | TACTAAC | 0 | 206162  |
| chrXIII | 211547  | + | chrXIII:211502:211547:+  | 1 | 1 | 1 | 1 | 0 | TTTTAA | 1 | 0 | 0 | 0 | 0 | 0 | TACTAAC | 0 | 211547  |
| chrXIII | 223421  | - | chrXIII:223421:223496:-  | 0 | 1 | 1 | 0 | 2 | GTACGC | 1 | 0 | 0 | 0 | 0 | 0 | TACTAAC | 0 | 223421  |
| chrXIII | 225264  | - | chrXIII:225264:225338:-  | 1 | 1 | 1 | 1 | 1 | GTACGT | 1 | 0 | 0 | 0 | 0 | 0 | TACTAAC | 0 | 225264  |
| chrXIII | 242969  | - | chrXIII:242969:243056:-  | 0 | 1 | 0 | 0 | 1 | GTAAGT | 0 | 1 | 1 | 0 | 1 | 0 | TACTGAC | 1 | 242969  |
| chrXIII | 273521  | - | chrXIII:273521:273577:-  | 0 | 1 | 0 | 0 | 1 | GTGTGT | 0 | 1 | 1 | 0 | 1 | 0 | CACTAAC | 1 | 273521  |
| chrXIII | 290869  | + | chrXIII:290835:290869:+  | 1 | 0 | 0 | 0 | 4 | CACCGT | 0 | 1 | 0 | 0 | 0 | 0 | GACTCCC | 3 | 290860  |
| chrXIII | 301517  | - | chrXIII:301517:301586:-  | 0 | 1 | 0 | 0 | 1 | GTAAGT | 0 | 1 | 1 | 0 | 1 | 0 | TACTAAC | 0 | 301517  |
| chrXIII | 337886  | + | chrXIII:337817:337886:+  | 1 | 1 | 1 | 1 | 1 | GTACGT | 1 | 0 | 0 | 0 | 0 | 0 | TACTAAC | 0 | 337886  |
| chrXIII | 425094  | + | chrXIII:424997:425094:+  | 1 | 0 | 0 | 1 | 0 | GTATGT | 0 | 1 | 1 | 1 | 0 | 0 | TATCAAT | 3 | 425101  |
| chrXIII | 425113  | + | chrXIII:425020:425113:+  | 0 | 1 | 1 | 0 | 3 | TTTTCT | 1 | 0 | 0 | 0 | 0 | 0 | TACTAAC | 0 | 425113  |
| chrXIII | 480618  | - | chrXIII:480618:480665:-  | 1 | 0 | 0 | 0 | 4 | ATGACT | 0 | 1 | 0 | 0 | 0 | 0 | TTCTTTT | 4 | 480615  |
| chrXIII | 491154  | + | chrXIII:491103:491154:+  | 0 | 1 | 0 | 0 | 3 | GTACTG | 0 | 1 | 0 | 0 | 0 | 0 | TACTAAC | 0 | 491154  |
| chrXIII | 493958  | + | chrXIII:493909:493958:+  | 0 | 1 | 0 | 0 | 1 | GTTTGT | 0 | 1 | 1 | 0 | 1 | 0 | TACTAAT | 1 | 493958  |
| chrXIII | 499898  | - | chrXIII:499898:499948:-  | 0 | 1 | 1 | 0 | 1 | TTATGT | 1 | 0 | 0 | 0 | 0 | 0 | TACTAAC | 0 | 499898  |
| chrXIII | 517842  | + | chrXIII:517791:517842:+  | 0 | 1 | 1 | 0 | 3 | GTAGC  | 1 | 0 | 0 | 0 | 0 | 0 | TACTAAC | 0 | 517842  |
| chrXIII | 537527  | + | chrXIII:537448:537527:+  | 1 | 1 | 1 | 1 | 0 | GTATGT | 1 | 0 | 0 | 0 | 0 | 0 | TACTAAC | 0 | 537527  |
| chrXIII | 551141  | - | chrXIII:551141:551202:-  | 1 | 0 | 0 | 1 | 0 | GTATGT | 0 | 0 | 0 | 0 | 0 | 0 | AACTAAT | 2 | 551143  |
| chrXIII | 551143  | - | chrXIII:551143:551202:-  | 0 | 1 | 0 | 1 | 0 | GTATGT | 0 | 1 | 1 | 0 | 1 | 0 | AACTAAT | 2 | 551143  |
| chrXIII | 552477  | + | chrXIII:552425:552477:+  | 0 | 1 | 0 | 0 | 3 | ATTTTT | 0 | 1 | 0 | 0 | 0 | 0 | AACTAAT | 2 | 552477  |
| chrXIII | 559828  | + | chrXIII:559782:559828:+  | 1 | 0 | 0 | 0 | 0 | GTATGT | 0 | 0 | 0 | 0 | 0 | 0 | TACTAAC | 0 | 559831  |
| chrXIII | 559831  | + | chrXIII:559782:559831:+  | 0 | 1 | 0 | 0 | 0 | GTATGT | 0 | 1 | 1 | 0 | 1 | 0 | TACTAAC | 0 | 559831  |
| chrXIII | 608719  | + | chrXIII:608660:608719:+  | 1 | 0 | 0 | 0 | 2 | GTATTA | 0 | 1 | 0 | 0 | 0 | 0 | TGCTAAC | 1 | 608722  |
| chrXIII | 637454  | + | chrXIII:637403:637454:+  | 0 | 1 | 0 | 0 | 1 | GTGTGT | 0 | 1 | 1 | 0 | 1 | 0 | AACTAAC | 1 | 637454  |
| chrXIII | 647110  | + | chrXIII:647059:647110:+  | 1 | 0 | 0 | 0 | 1 | GCATGT | 0 | 0 | 0 | 0 | 0 | 0 | CACTAAC | 1 | 647113  |
| chrXIII | 647113  | + | chrXIII:647059:647113:+  | 0 | 1 | 0 | 0 | 1 | GCATGT | 0 | 1 | 1 | 0 | 1 | 0 | CACTAAC | 1 | 647113  |
| chrXIII | 649542  | - | chrXIII:649542:649630:-  | 0 | 1 | 0 | 0 | 1 | GTATGG | 0 | 1 | 1 | 0 | 1 | 0 | TACTAAC | 0 | 649542  |
| chrXIII | 651593  | + | chrXIII:651524:651593:+  | 0 | 1 | 1 | 0 | 2 | GTACAT | 1 | 0 | 0 | 0 | 0 | 0 | TACTAAC | 0 | 651593  |
| chrXIII | 652797  | - | chrXIII:652797:652846:-  | 1 | 1 | 1 | 1 | 1 | GTTTGT | 1 | 0 | 0 | 0 | 0 | 0 | CACTAAC | 1 | 652797  |
| chrXIII | 652808  | - | chrXIII:652808:652846:-  | 1 | 0 | 0 | 1 | 1 | GTTTGT | 0 | 1 | 1 | 1 | 0 | 0 | CACTAAC | 1 | 652797  |
| chrXIII | 653957  | - | chrXIII:653957:654018:-  | 0 | 1 | 0 | 0 | 0 | GTATGT | 0 | 1 | 1 | 0 | 1 | 0 | TATTAAC | 1 | 653957  |
| chrXIII | 666961  | - | chrXIII:666961:667016:-  | 1 | 1 | 1 | 1 | 0 | GTATGT | 1 | 0 | 0 | 0 | 0 | 0 | TACTAAC | 0 | 666961  |
| chrXIII | 701814  | + | chrXIII:701740:701814:+  | 0 | 1 | 0 | 0 | 1 | GTAGGT | 0 | 1 | 1 | 0 | 1 | 0 | TTCTAAC | 1 | 701814  |
| chrXIII | 721231  | - | chrXIII:721231:721344:-  | 1 | 1 | 1 | 1 | 0 | GTATGT | 1 | 0 | 0 | 0 | 0 | 0 | TACTAAC | 0 | 721231  |
| chrXIII | 727506  | + | chrXIII:727436:727506:+  | 0 | 1 | 0 | 0 | 6 | TCCCAA | 0 | 1 | 0 | 0 | 0 | 0 | TACTAAC | 0 | 727506  |
| chrXIII | 732835  | + | chrXIII:732773:732835:+  | 0 | 1 | 1 | 0 | 2 | GTATTA | 1 | 0 | 0 | 0 | 0 | 0 | TACTAAC | 0 | 732835  |
| chrXIII | 753788  | - | chrXIII:753788:753832:-  | 0 | 1 | 1 | 0 | 4 | ATAAAA | 1 | 0 | 0 | 0 | 0 | 0 | TACTAAC | 0 | 753788  |
| chrXIII | 810475  | - | chrXIII:810475:810549:-  | 0 | 1 | 0 | 0 | 1 | GTATGA | 0 | 1 | 1 | 0 | 1 | 0 | GACTAAC | 4 | 810475  |
| chrXIII | 822588  | - | chrXIII:822588:822625:-  | 1 | 0 | 0 | 0 | 5 | ATCAAA | 0 | 1 | 0 | 0 | 0 | 0 | AAAAAAG | 4 | 822589  |
| chrXIII | 832410  | + | chrXIII:832362:832410:+  | 1 | 0 | 0 | 0 | 2 | GTAAGT | 0 | 0 | 0 | 0 | 0 | 0 | TACTGAC | 1 | 832413  |
| chrXIII | 832413  | + | chrXIII:832362:832413:+  | 0 | 1 | 0 | 0 | 2 | GTAAGT | 0 | 1 | 0 | 0 | 0 | 0 | TACTGAC | 1 | 832413  |
| chrXIII | 845439  | - | chrXIII:845439:845541:-  | 0 | 1 | 0 | 0 | 1 | TTATGT | 0 | 1 | 1 | 0 | 1 | 0 | TACTAAC | 0 | 845439  |
| chrXIII | 854879  | + | chrXIII:854816:854879:+  | 1 | 1 | 1 | 1 | 0 | GTATGT | 1 | 0 | 0 | 0 | 0 | 0 | TACTAAC | 0 | 854879  |
| chrXIII | 887492  | + | chrXIII:887427:887492:+  | 0 | 1 | 0 | 0 | 3 | CGTTGT | 0 | 1 | 0 | 0 | 0 | 0 | TACTAAC | 0 | 887492  |
| chrXIII | 894576  | - | chrXIII:894576:894616:-  | 0 | 1 | 0 | 0 | 4 | CAATCA | 0 | 1 | 0 | 0 | 0 | 0 | TATTAAC | 1 | 894576  |
| chrXIII | 910099  | - | chrXIII:910099:910130:-  | 0 | 1 | 0 | 0 | 2 | CGATGT | 0 | 1 | 0 | 0 | 0 | 0 | TAGTAAC | 1 | 910099  |
| chrXIV  | 17325   | - | chrXIV:17325:17361:-     | 0 | 1 | 0 | 0 | 3 | CCAAGT | 0 | 1 | 0 | 0 | 0 | 0 | CATTAAC | 2 | 17325   |
| chrXIV  | 48377   | + | chrXIV:48293:48377:+     | 1 | 1 | 1 | 1 | 0 | GTATGT | 1 | 0 | 0 | 0 | 0 | 0 | TACTAAC | 0 | 48377   |
| chrXIV  | 62407   | - | chrXIV:62407:62472:-     | 0 | 1 | 1 | 0 | 3 | AGTTGT | 1 | 0 | 0 | 0 | 0 | 0 | TACTAAC | 0 | 62407   |
| chrXIV  | 64389   | - | chrXIV:64389:64425:-     | 0 | 1 | 0 | 0 | 3 | TTTTCT | 0 | 1 | 0 | 0 | 0 | 0 | TATTAAC | 1 | 64389   |
| chrXIV  | 69245   | + | chrXIV:69184:69245:+     | 0 | 1 | 0 | 0 | 0 | GTATGT | 0 | 1 | 1 | 0 | 1 | 0 | CACTAAC | 1 | 69245   |
| chrXIV  | 145191  | - | chrXIV:145191:145255:-   | 1 | 1 | 1 | 1 | 0 | GTATGT | 1 | 0 | 0 | 0 | 0 | 0 | TACTAAC | 0 | 145191  |
| chrXIV  | 174520  | - | chrXIV:174520:174572:-   | 1 | 0 | 0 | 0 | 2 | GTATCG | 0 | 0 | 0 | 0 | 0 | 0 | AACTAAC | 1 | 174522  |
| chrXIV  | 174522  | - | chrXIV:174522:174572:-   | 0 | 1 | 0 | 0 | 2 | GTATCG | 0 | 1 | 0 | 0 | 0 | 0 | AACTAAC | 1 | 174522  |
| chrXIV  | 185553  | + | chrXIV:185493:185553:+   | 1 | 1 | 1 | 1 | 0 | GTATGT | 1 | 0 | 0 | 0 | 0 | 0 | TACTAAC | 0 | 185553  |
| chrXIV  | 217114  | - | chrXIV:217114:217193:-   | 0 | 1 | 0 | 0 | 0 | GTATGT | 0 | 1 | 1 | 0 | 1 | 0 | TTCTAAC | 1 | 217114  |
| chrXIV  | 224800  | + | chrXIV:224764:224800:+   | 0 | 1 | 0 | 0 | 3 | TTAAGA | 0 | 1 | 0 | 0 | 0 | 0 | TATTAAC | 1 | 224800  |
| chrXIV  | 227321  | - | chrXIV:227321:227353:-   | 0 | 1 | 0 | 0 | 4 | GTGATA | 0 | 1 | 0 | 0 | 0 | 0 | TACTAAC | 0 | 227321  |
| chrXIV  | 250195  | - | chrXIV:250195:250238:-   | 0 | 1 | 0 | 0 | 1 | GTATAT | 0 | 1 | 1 | 0 | 1 | 0 | CACTGAC | 2 | 250195  |
| chrXIV  | 273232  | + | chrXIV:273189:273232:+   | 0 | 1 | 0 | 0 | 1 | GTACGT | 0 | 1 | 1 | 0 | 1 | 0 | AACTAAC | 1 | 273232  |
| chrXIV  | 273585  | - | chrXIV:273585:273650:-   | 0 | 1 | 0 | 0 | 2 | GTATAA | 0 | 1 | 0 | 0 | 0 | 0 | TATTAAC | 1 | 273585  |

|        |         |   |                         |   |   |   |   |   |        |   |   |   |   |   |   |          |   |         |
|--------|---------|---|-------------------------|---|---|---|---|---|--------|---|---|---|---|---|---|----------|---|---------|
| chrXIV | 324786  | - | chrXIV:324786:324827:-  | 0 | 1 | 0 | 0 | 5 | AGGTAG | 0 | 1 | 0 | 0 | 0 | 0 | CACTAAC  | 1 | 324786  |
| chrXIV | 331803  | + | chrXIV:331744:331803:+  | 0 | 1 | 1 | 0 | 2 | ATATGC | 1 | 0 | 0 | 0 | 0 | 0 | TACTAAC  | 0 | 331803  |
| chrXIV | 349281  | - | chrXIV:349281:349355:-  | 0 | 1 | 0 | 0 | 1 | GTATGG | 0 | 1 | 1 | 0 | 1 | 0 | GTCTAAC  | 2 | 349281  |
| chrXIV | 351021  | + | chrXIV:350960:351021:+  | 1 | 1 | 1 | 1 | 0 | GTATGT | 1 | 0 | 0 | 0 | 0 | 0 | TACTAAC  | 0 | 351021  |
| chrXIV | 359078  | - | chrXIV:359078:359147:-  | 0 | 1 | 0 | 0 | 1 | GTATAT | 0 | 1 | 1 | 0 | 1 | 0 | TACTAAC  | 0 | 359078  |
| chrXIV | 366096  | + | chrXIV:366038:366096:+  | 1 | 1 | 1 | 1 | 0 | GTATGT | 1 | 0 | 0 | 0 | 0 | 0 | TACTAAC  | 0 | 366096  |
| chrXIV | 369426  | - | chrXIV:369426:369506:-  | 0 | 1 | 0 | 0 | 0 | GTATGT | 0 | 1 | 1 | 0 | 1 | 0 | TTCTAAC  | 1 | 369426  |
| chrXIV | 373657  | + | chrXIV:373596:373657:+  | 1 | 0 | 0 | 0 | 1 | GTATGA | 0 | 0 | 0 | 0 | 0 | 0 | TACTAAT  | 1 | 373659  |
| chrXIV | 373659  | + | chrXIV:373596:373659:+  | 0 | 1 | 0 | 0 | 1 | GTATGA | 0 | 1 | 1 | 0 | 1 | 0 | TACTAAT  | 1 | 373659  |
| chrXIV | 380699  | - | chrXIV:380699:380783:-  | 1 | 0 | 0 | 1 | 0 | GTATGT | 0 | 0 | 0 | 0 | 0 | 0 | TACTAAT  | 1 | 380703  |
| chrXIV | 380703  | - | chrXIV:380703:380783:-  | 0 | 1 | 0 | 0 | 1 | GTATGT | 0 | 1 | 1 | 0 | 1 | 0 | TACTAAT  | 1 | 380703  |
| chrXIV | 380726  | - | chrXIV:380726:380783:-  | 1 | 1 | 1 | 1 | 0 | GTATGT | 1 | 0 | 0 | 0 | 0 | 0 | TACTAAC  | 0 | 380726  |
| chrXIV | 394038  | + | chrXIV:393996:394038:+  | 0 | 1 | 0 | 0 | 1 | GTATGC | 0 | 1 | 1 | 0 | 1 | 0 | GACTAAC  | 1 | 394038  |
| chrXIV | 401582  | + | chrXIV:401504:401582:+  | 0 | 1 | 0 | 0 | 2 | GTATCG | 0 | 1 | 0 | 0 | 0 | 0 | TATTAAC  | 1 | 401582  |
| chrXIV | 413438  | - | chrXIV:413438:413482:-  | 1 | 0 | 0 | 0 | 4 | CGGGCT | 0 | 1 | 0 | 0 | 0 | 0 | TAAAAA   | 3 | 413441  |
| chrXIV | 415872  | + | chrXIV:415827:415872:+  | 0 | 1 | 1 | 0 | 2 | GCATGA | 1 | 0 | 0 | 0 | 0 | 0 | TACTAAC  | 0 | 415872  |
| chrXIV | 427176  | + | chrXIV:427106:427176:+  | 1 | 0 | 0 | 0 | 1 | GTATGA | 0 | 0 | 0 | 0 | 0 | 0 | GACTAAC  | 1 | 427178  |
| chrXIV | 427178  | + | chrXIV:427106:427178:+  | 0 | 1 | 0 | 0 | 1 | GTATGA | 0 | 1 | 1 | 0 | 1 | 0 | GACTAAC  | 1 | 427178  |
| chrXIV | 429574  | - | chrXIV:429574:429637:-  | 1 | 0 | 0 | 0 | 0 | GTATGT | 0 | 0 | 0 | 0 | 0 | 0 | TTCTAAC  | 1 | 429576  |
| chrXIV | 429576  | - | chrXIV:429576:429637:-  | 0 | 1 | 0 | 0 | 0 | GTATGT | 0 | 1 | 1 | 0 | 1 | 0 | TTCTAAC  | 1 | 429576  |
| chrXIV | 429600  | - | chrXIV:429600:429637:-  | 0 | 1 | 0 | 0 | 0 | GTATGT | 0 | 1 | 1 | 0 | 1 | 0 | TTCTAAC  | 4 | 429600  |
| chrXIV | 494551  | - | chrXIV:494551:494633:-  | 1 | 1 | 1 | 0 | 3 | GTAATG | 1 | 0 | 0 | 0 | 0 | 0 | TACTAAC  | 0 | 494551  |
| chrXIV | 534915  | - | chrXIV:534915:534966:-  | 1 | 1 | 1 | 1 | 1 | GTATGC | 1 | 0 | 0 | 0 | 0 | 0 | TACTAAC  | 0 | 534915  |
| chrXIV | 545341  | + | chrXIV:545293:545341:+  | 1 | 1 | 1 | 1 | 1 | GTAAGT | 1 | 0 | 0 | 0 | 0 | 0 | TACTAAC  | 0 | 545341  |
| chrXIV | 545603  | + | chrXIV:545556:545603:+  | 0 | 1 | 0 | 0 | 2 | GTAAGT | 0 | 1 | 0 | 0 | 0 | 0 | TATTAAC  | 1 | 545603  |
| chrXIV | 557672  | + | chrXIV:557612:557672:+  | 1 | 1 | 1 | 1 | 0 | GTATGT | 1 | 0 | 0 | 0 | 0 | 0 | TACTAAC  | 0 | 557672  |
| chrXIV | 561151  | - | chrXIV:561151:561218:-  | 0 | 1 | 0 | 0 | 3 | AAATAT | 0 | 1 | 0 | 0 | 0 | 0 | CACCTAAC | 1 | 561151  |
| chrXIV | 573918  | - | chrXIV:573918:573973:-  | 0 | 1 | 0 | 0 | 2 | GTTTGA | 0 | 1 | 0 | 0 | 0 | 0 | TACTGAC  | 1 | 573918  |
| chrXIV | 583911  | - | chrXIV:583911:583971:-  | 1 | 1 | 0 | 0 | 0 | GTATGT | 0 | 1 | 1 | 0 | 1 | 0 | AACTAAC  | 1 | 583911  |
| chrXIV | 598313  | + | chrXIV:598259:598313:+  | 0 | 1 | 0 | 0 | 2 | GTTTGA | 0 | 1 | 0 | 0 | 0 | 0 | TACTGAC  | 1 | 598313  |
| chrXIV | 609837  | + | chrXIV:609792:609837:+  | 1 | 1 | 1 | 1 | 1 | GTAAGT | 1 | 0 | 0 | 0 | 0 | 0 | AACTAAC  | 1 | 609837  |
| chrXIV | 611577  | + | chrXIV:611503:611577:+  | 1 | 0 | 0 | 0 | 0 | GTATGT | 0 | 0 | 0 | 0 | 0 | 0 | TATTAAC  | 1 | 611580  |
| chrXIV | 611580  | + | chrXIV:611503:611580:+  | 0 | 1 | 0 | 0 | 0 | GTATGT | 0 | 1 | 1 | 0 | 1 | 0 | TATTAAC  | 1 | 611580  |
| chrXIV | 623270  | + | chrXIV:623196:623270:+  | 0 | 1 | 1 | 0 | 3 | GTACAG | 1 | 0 | 0 | 0 | 0 | 0 | TACTAAT  | 1 | 623270  |
| chrXIV | 724879  | + | chrXIV:724794:724879:+  | 0 | 1 | 0 | 0 | 3 | GGTAGT | 0 | 1 | 0 | 0 | 0 | 0 | TACTAAC  | 0 | 724879  |
| chrXIV | 726915  | - | chrXIV:726915:726978:-  | 0 | 1 | 0 | 0 | 1 | GTCTGT | 0 | 1 | 1 | 0 | 1 | 0 | TACTAAC  | 0 | 726915  |
| chrXIV | 763544  | + | chrXIV:763498:763544:+  | 1 | 0 | 0 | 0 | 3 | GTACAG | 0 | 1 | 0 | 0 | 0 | 0 | TACTAAC  | 0 | 763547  |
| chrXIV | 763547  | + | chrXIV:763498:763547:+  | 0 | 1 | 0 | 0 | 3 | GTACAG | 0 | 1 | 0 | 0 | 0 | 0 | TACTAAC  | 0 | 763547  |
| chrXIV | 767745  | - | chrXIV:767745:767788:-  | 0 | 1 | 0 | 0 | 2 | GTACGC | 0 | 1 | 0 | 0 | 0 | 0 | AACTAAC  | 1 | 767745  |
| chrXV  | 87615   | + | chrXV:87554:87615:+     | 0 | 1 | 0 | 0 | 1 | GTATCT | 0 | 1 | 1 | 0 | 1 | 0 | TTCTAAC  | 1 | 87615   |
| chrXV  | 92476   | - | chrXV:92476:92521:-     | 1 | 1 | 1 | 0 | 3 | GTAATG | 1 | 0 | 0 | 0 | 0 | 0 | TACTAAC  | 0 | 92476   |
| chrXV  | 93868   | - | chrXV:93868:93914:-     | 0 | 1 | 1 | 0 | 2 | GTACGG | 1 | 0 | 0 | 0 | 0 | 0 | TACTAAC  | 0 | 93868   |
| chrXV  | 117635  | - | chrXV:117635:117684:-   | 1 | 0 | 0 | 0 | 1 | GTATGC | 0 | 1 | 1 | 0 | 1 | 0 | GACTAGC  | 2 | 117636  |
| chrXV  | 139435  | + | chrXV:139377:139435:+   | 0 | 1 | 0 | 0 | 1 | GTAAGT | 0 | 1 | 1 | 0 | 1 | 0 | TACTGAC  | 1 | 139435  |
| chrXV  | 240976  | - | chrXV:240976:241024:-   | 1 | 1 | 1 | 1 | 1 | GTAAGT | 1 | 0 | 0 | 0 | 0 | 0 | GACTAAC  | 1 | 240976  |
| chrXV  | 242453  | - | chrXV:242453:242503:-   | 1 | 1 | 1 | 1 | 0 | GTATGT | 1 | 0 | 0 | 0 | 0 | 0 | TACTAAC  | 0 | 242453  |
| chrXV  | 249914  | + | chrXV:249872:249914:+   | 0 | 1 | 0 | 0 | 3 | ATCGGT | 0 | 1 | 0 | 0 | 0 | 0 | TATTAAC  | 1 | 249914  |
| chrXV  | 325376  | - | chrXV:325376:325450:-   | 1 | 1 | 0 | 0 | 2 | GTATCG | 0 | 1 | 0 | 0 | 0 | 0 | TACTAAC  | 0 | 325376  |
| chrXV  | 349520  | - | chrXV:349520:349598:-   | 1 | 0 | 0 | 0 | 0 | GTATGT | 0 | 1 | 1 | 0 | 1 | 0 | TACTAAG  | 1 | 349522  |
| chrXV  | 418634  | + | chrXV:418634:418634:+   | 0 | 1 | 0 | 0 | 1 | GTATGA | 0 | 1 | 1 | 0 | 1 | 0 | TTCTAAC  | 1 | 418634  |
| chrXV  | 423676  | - | chrXV:423676:423735:-   | 1 | 1 | 0 | 0 | 1 | GTATGG | 0 | 1 | 1 | 0 | 1 | 0 | TACTGAC  | 1 | 423676  |
| chrXV  | 437797  | - | chrXV:437797:437846:-   | 0 | 1 | 0 | 0 | 1 | GTATAT | 0 | 1 | 1 | 0 | 1 | 0 | TACTAAC  | 0 | 437797  |
| chrXV  | 448694  | + | chrXV:448667:448694:+   | 1 | 0 | 0 | 0 | 3 | TAATAT | 0 | 1 | 0 | 0 | 0 | 0 | AAAAAA   | 4 | 448694  |
| chrXV  | 505980  | + | chrXV:505939:505980:+   | 1 | 0 | 0 | 1 | 0 | GTATGT | 0 | 1 | 1 | 1 | 0 | 0 | GAGTAAC  | 2 | 505983  |
| chrXV  | 506800  | - | chrXV:506800:506870:-   | 1 | 0 | 0 | 0 | 1 | GTATTT | 0 | 0 | 0 | 0 | 0 | 0 | TACTAAC  | 0 | 506802  |
| chrXV  | 506802  | - | chrXV:506802:506870:-   | 0 | 1 | 0 | 0 | 1 | GTATTT | 0 | 1 | 1 | 0 | 1 | 0 | TACTAAC  | 0 | 506802  |
| chrXV  | 518763  | - | chrXV:518763:518826:-   | 1 | 0 | 0 | 0 | 1 | ATATGT | 0 | 0 | 0 | 0 | 0 | 0 | TACTAAC  | 0 | 518765  |
| chrXV  | 518765  | - | chrXV:518765:518826:-   | 0 | 1 | 0 | 0 | 1 | ATATGT | 0 | 1 | 1 | 0 | 1 | 0 | TACTAAC  | 0 | 518765  |
| chrXV  | 527238  | + | chrXV:527186:527238:+   | 0 | 1 | 0 | 0 | 1 | GTATGA | 0 | 1 | 1 | 0 | 1 | 0 | TACTAAT  | 1 | 527238  |
| chrXV  | 594353  | - | chrXV:594353:594426:-   | 1 | 0 | 0 | 0 | 5 | GCGCAA | 0 | 1 | 0 | 0 | 0 | 0 | TGCATAA  | 3 | 594341  |
| chrXV  | 605430  | + | chrXV:605379:605430:+   | 0 | 1 | 0 | 0 | 1 | GTACGT | 0 | 1 | 1 | 0 | 1 | 0 | AACTAAC  | 1 | 605430  |
| chrXV  | 630886  | - | chrXV:630886:630936:-   | 0 | 1 | 0 | 0 | 2 | GTATAG | 0 | 1 | 0 | 0 | 0 | 0 | AACTAAC  | 1 | 630886  |
| chrXV  | 674438  | - | chrXV:674438:674504:-   | 0 | 1 | 0 | 0 | 1 | GTATGA | 0 | 1 | 1 | 0 | 1 | 0 | GACTAAC  | 1 | 674438  |
| chrXV  | 720497  | + | chrXV:720444:720497:+   | 1 | 0 | 0 | 0 | 0 | GTATGT | 0 | 0 | 0 | 0 | 0 | 0 | TATTAAC  | 1 | 720500  |
| chrXV  | 720500  | + | chrXV:720444:720500:+   | 0 | 1 | 0 | 0 | 0 | GTATGT | 0 | 1 | 1 | 0 | 1 | 0 | TATTAAC  | 1 | 720500  |
| chrXV  | 733353  | - | chrXV:733353:733417:-   | 1 | 0 | 0 | 0 | 1 | GCATGT | 0 | 0 | 0 | 0 | 0 | 0 | AACTAAC  | 1 | 733356  |
| chrXV  | 733356  | - | chrXV:733356:733417:-   | 0 | 1 | 0 | 0 | 1 | GCATGT | 0 | 1 | 1 | 0 | 1 | 0 | AACTAAC  | 1 | 733356  |
| chrXV  | 754238  | - | chrXV:754238:754290:-   | 0 | 1 | 0 | 0 | 1 | GTAAGT | 0 | 1 | 1 | 0 | 1 | 0 | AACTAAC  | 1 | 754238  |
| chrXV  | 778910  | - | chrXV:778910:778959:-   | 0 | 1 | 1 | 0 | 4 | GTCGAA | 1 | 0 | 0 | 0 | 0 | 0 | TACTAAC  | 0 | 778910  |
| chrXV  | 791704  | - | chrXV:791704:791753:-   | 1 | 1 | 0 | 0 | 2 | TTACGT | 0 | 1 | 0 | 0 | 0 | 0 | TACTAAC  | 0 | 791704  |
| chrXV  | 819160  | + | chrXV:819077:819160:+   | 0 | 1 | 0 | 0 | 1 | GTCTGT | 0 | 1 | 1 | 0 | 1 | 0 | TACTGAC  | 1 | 819160  |
| chrXV  | 836399  | - | chrXV:836399:836448:-   | 0 | 1 | 0 | 0 | 2 | ATATTT | 0 | 1 | 0 | 0 | 0 | 0 | ATCTAAC  | 2 | 836399  |
| chrXV  | 845020  | + | chrXV:844959:845020:+   | 1 | 0 | 0 | 0 | 0 | GTATGT | 0 | 0 | 0 | 0 | 0 | 0 | ATCTAAC  | 2 | 845023  |
| chrXV  | 845023  | + | chrXV:844959:845023:+   | 0 | 1 | 0 | 0 | 0 | GTATGT | 0 | 1 | 1 | 0 | 1 | 0 | ATCTAAC  | 2 | 845023  |
| chrXV  | 867516  | + | chrXV:867439:867516:+   | 0 | 1 | 1 | 0 | 3 | GTAATA | 1 | 0 | 0 | 0 | 0 | 0 | TACTAAC  | 0 | 867516  |
| chrXV  | 900802  | - | chrXV:900802:900850:-   | 1 | 1 | 1 | 0 | 2 | GTAATT | 1 | 0 | 0 | 0 | 0 | 0 | TACTAAC  | 0 | 900802  |
| chrXV  | 930113  | + | chrXV:930063:930113:+   | 1 | 0 | 0 | 0 | 1 | GTAAGT | 0 | 1 | 1 | 1 | 0 | 1 | CGCTAAC  | 2 | 930116  |
| chrXV  | 1003995 | - | chrXV:1003995:1004066:- | 0 | 1 | 0 | 0 | 2 | GTGAGT | 0 | 1 | 0 | 0 | 0 | 0 | TACTAAC  | 0 | 1003995 |
| chrXV  | 1030464 | - | chrXV:1030464:1030507:- | 0 | 1 | 0 | 0 | 4 | ATCTAA | 0 | 1 | 0 | 0 | 0 | 0 | AACTAAC  | 1 | 1030464 |
| chrXV  | 1059710 | - | chrXV:1059710:1059794:- | 0 | 1 | 0 | 0 | 1 | GTAAGT | 0 | 1 | 1 | 0 | 1 | 0 | TACTGAC  | 1 | 1059710 |
| chrXV  | 1062513 | - | chrXV:1062513:1062560:- | 1 | 1 | 0 | 0 | 1 | GTATGC | 0 | 1 | 1 | 0 | 1 | 0 | TACTAAC  | 0 | 1062513 |
| chrXVI | 76014   | - | chrXVI:76014:76017:-    | 0 | 1 | 1 | 0 | 2 | GTCTTT | 1 | 0 | 0 | 0 | 0 | 0 | TACTAAC  | 0 | 76014   |



|        |        |   |                        |   |   |   |   |   |        |   |   |   |   |   |   |          |   |        |
|--------|--------|---|------------------------|---|---|---|---|---|--------|---|---|---|---|---|---|----------|---|--------|
| chrXVI | 76164  | - | chrXVI:76164:76223:-   | 1 | 0 | 0 | 1 | 0 | GTATGT | 0 | 1 | 1 | 0 | 1 | 0 | CACTAAG  | 2 | 76166  |
| chrXVI | 96189  | - | chrXVI:96189:96233:-   | 1 | 1 | 1 | 1 | 0 | GTATGT | 1 | 0 | 0 | 0 | 0 | 0 | AATTAAC  | 2 | 96189  |
| chrXVI | 101223 | + | chrXVI:101139:101223:+ | 0 | 1 | 0 | 0 | 1 | GTAAGT | 0 | 1 | 1 | 0 | 1 | 0 | TATTAAC  | 1 | 101223 |
| chrXVI | 115267 | + | chrXVI:115219:115267:+ | 1 | 0 | 0 | 1 | 0 | GTATGT | 0 | 0 | 0 | 0 | 0 | 0 | TACTAAC  | 0 | 115270 |
| chrXVI | 115270 | + | chrXVI:115219:115270:+ | 0 | 1 | 0 | 1 | 0 | GTATGT | 0 | 1 | 1 | 0 | 1 | 0 | TACTAAC  | 0 | 115270 |
| chrXVI | 146508 | - | chrXVI:146508:146597:- | 1 | 1 | 0 | 0 | 1 | GTATGA | 0 | 1 | 1 | 0 | 1 | 0 | TACTAAC  | 0 | 146508 |
| chrXVI | 159663 | + | chrXVI:159585:159663:+ | 0 | 1 | 0 | 0 | 1 | GTAAGT | 0 | 1 | 1 | 0 | 1 | 0 | TACTAAC  | 0 | 159663 |
| chrXVI | 174036 | + | chrXVI:173971:174036:+ | 1 | 1 | 1 | 0 | 3 | GTTTAA | 1 | 0 | 0 | 0 | 0 | 0 | TACTAAC  | 0 | 174036 |
| chrXVI | 196571 | - | chrXVI:196571:196616:- | 0 | 1 | 0 | 0 | 1 | GTATGG | 0 | 1 | 1 | 0 | 1 | 0 | ATCTAAC  | 2 | 196571 |
| chrXVI | 218695 | + | chrXVI:218646:218695:+ | 1 | 0 | 0 | 1 | 0 | GTATGT | 0 | 1 | 1 | 1 | 0 | 0 | GAAGATC  | 4 | 218690 |
| chrXVI | 218711 | + | chrXVI:218646:218711:+ | 1 | 1 | 1 | 1 | 0 | GTATGT | 1 | 0 | 0 | 0 | 0 | 0 | TACTAAC  | 0 | 218711 |
| chrXVI | 231558 | + | chrXVI:231499:231558:+ | 1 | 0 | 0 | 0 | 2 | GTAAGA | 0 | 0 | 0 | 0 | 0 | 0 | TACTAAC  | 0 | 231561 |
| chrXVI | 231561 | + | chrXVI:231499:231561:+ | 0 | 1 | 0 | 0 | 2 | GTAAGA | 0 | 1 | 0 | 0 | 0 | 0 | TACTAAC  | 0 | 231561 |
| chrXVI | 281450 | - | chrXVI:281450:281502:- | 1 | 0 | 0 | 1 | 0 | GTATGT | 0 | 1 | 1 | 0 | 1 | 0 | CAATAAT  | 3 | 281450 |
| chrXVI | 305374 | + | chrXVI:305306:305374:+ | 1 | 1 | 1 | 1 | 0 | GTATGT | 1 | 0 | 0 | 0 | 0 | 0 | TACTAAC  | 0 | 305374 |
| chrXVI | 335968 | + | chrXVI:335905:335968:+ | 1 | 0 | 0 | 0 | 0 | GTATGT | 0 | 1 | 1 | 0 | 1 | 0 | TACTTAC  | 1 | 335970 |
| chrXVI | 339246 | + | chrXVI:339174:339246:+ | 0 | 1 | 0 | 0 | 1 | GTATAT | 0 | 1 | 1 | 0 | 1 | 0 | TATTAAC  | 1 | 339246 |
| chrXVI | 339306 | + | chrXVI:339230:339306:+ | 0 | 1 | 0 | 0 | 1 | GTAAGT | 0 | 1 | 1 | 0 | 1 | 0 | TACTGAC  | 1 | 339306 |
| chrXVI | 345483 | - | chrXVI:345483:345574:- | 0 | 1 | 1 | 0 | 4 | TAACGG | 1 | 0 | 0 | 0 | 0 | 0 | TACTAAC  | 0 | 345483 |
| chrXVI | 405426 | + | chrXVI:405372:405426:+ | 0 | 1 | 1 | 0 | 3 | ATTTAT | 1 | 0 | 0 | 0 | 0 | 0 | CACTAAC  | 1 | 405426 |
| chrXVI | 407002 | + | chrXVI:406952:407002:+ | 1 | 1 | 1 | 0 | 1 | GTGTGT | 1 | 0 | 0 | 0 | 0 | 0 | TACTAAC  | 0 | 407002 |
| chrXVI | 412958 | + | chrXVI:412887:412958:+ | 1 | 1 | 1 | 0 | 2 | TAATGT | 1 | 0 | 0 | 0 | 0 | 0 | TACTAAC  | 0 | 412958 |
| chrXVI | 445520 | - | chrXVI:445520:445573:- | 1 | 1 | 0 | 0 | 1 | GTGTGT | 0 | 1 | 1 | 0 | 1 | 0 | GACTAAC  | 1 | 445520 |
| chrXVI | 481182 | - | chrXVI:481182:481238:- | 1 | 0 | 0 | 0 | 1 | GTACGT | 0 | 0 | 0 | 0 | 0 | 0 | CACTAAC  | 1 | 481184 |
| chrXVI | 481184 | - | chrXVI:481184:481238:- | 0 | 1 | 0 | 0 | 1 | GTACGT | 0 | 1 | 1 | 0 | 1 | 0 | CACTAAC  | 1 | 481184 |
| chrXVI | 490810 | - | chrXVI:490810:490857:- | 0 | 1 | 0 | 0 | 1 | GTAAGT | 0 | 1 | 1 | 0 | 1 | 0 | TATTAAC  | 1 | 490810 |
| chrXVI | 492958 | - | chrXVI:492958:493018:- | 1 | 1 | 1 | 1 | 0 | GTATGT | 1 | 0 | 0 | 0 | 0 | 0 | TACTAAC  | 0 | 492958 |
| chrXVI | 513416 | - | chrXVI:513416:513466:- | 0 | 1 | 0 | 0 | 1 | GTATGG | 0 | 1 | 1 | 1 | 0 | 0 | TACTAAA  | 1 | 513407 |
| chrXVI | 560471 | + | chrXVI:560413:560471:+ | 0 | 1 | 0 | 0 | 1 | GTAAGT | 0 | 1 | 1 | 0 | 1 | 0 | TACTAAT  | 1 | 560471 |
| chrXVI | 579896 | - | chrXVI:579896:579965:- | 0 | 1 | 0 | 0 | 1 | GTATGA | 0 | 1 | 1 | 0 | 1 | 0 | TATTAAC  | 1 | 579896 |
| chrXVI | 584022 | - | chrXVI:584022:584078:- | 1 | 0 | 0 | 0 | 2 | GTATTG | 0 | 0 | 0 | 0 | 0 | 0 | TACTGAC  | 1 | 584024 |
| chrXVI | 584024 | - | chrXVI:584024:584078:- | 0 | 1 | 0 | 0 | 2 | GTATTG | 0 | 1 | 0 | 0 | 0 | 0 | TACTGAC  | 1 | 584024 |
| chrXVI | 590145 | - | chrXVI:590145:590200:- | 0 | 1 | 0 | 0 | 1 | ATATGT | 0 | 1 | 1 | 0 | 1 | 0 | TACTGAC  | 1 | 590145 |
| chrXVI | 593080 | - | chrXVI:593080:593139:- | 1 | 0 | 0 | 0 | 2 | GTATAA | 0 | 0 | 0 | 0 | 0 | 0 | AACCTAAC | 1 | 593082 |
| chrXVI | 593082 | - | chrXVI:593082:593139:- | 0 | 1 | 0 | 0 | 2 | GTATAA | 0 | 1 | 0 | 0 | 0 | 0 | AACCTAAC | 1 | 593082 |
| chrXVI | 602284 | - | chrXVI:602284:602338:- | 1 | 0 | 0 | 0 | 0 | GTATGT | 0 | 1 | 1 | 0 | 1 | 0 | TACTAAA  | 1 | 602282 |
| chrXVI | 616652 | + | chrXVI:616593:616652:+ | 0 | 1 | 0 | 0 | 0 | GTATGT | 0 | 1 | 1 | 0 | 1 | 0 | TACTAAT  | 1 | 616652 |
| chrXVI | 617123 | + | chrXVI:617066:617123:+ | 0 | 1 | 0 | 0 | 1 | GTAAGT | 0 | 1 | 1 | 0 | 1 | 0 | TATTAAC  | 1 | 617123 |
| chrXVI | 623662 | + | chrXVI:623575:623662:+ | 1 | 1 | 1 | 1 | 0 | GTATGT | 1 | 0 | 0 | 0 | 0 | 0 | TACTAAC  | 0 | 623662 |
| chrXVI | 654534 | + | chrXVI:654471:654534:+ | 0 | 1 | 1 | 0 | 2 | GTATAA | 1 | 0 | 0 | 0 | 0 | 0 | TACTAAC  | 0 | 654534 |
| chrXVI | 656521 | - | chrXVI:656521:656572:- | 1 | 1 | 0 | 0 | 2 | GTAGTT | 0 | 1 | 0 | 0 | 0 | 0 | TACTAAC  | 0 | 656521 |
| chrXVI | 678219 | - | chrXVI:678219:678276:- | 1 | 1 | 1 | 1 | 0 | GTATGT | 1 | 0 | 0 | 0 | 0 | 0 | TACTAAC  | 0 | 678219 |
| chrXVI | 685776 | + | chrXVI:685691:685776:+ | 0 | 1 | 0 | 0 | 1 | GTAGGT | 0 | 1 | 1 | 0 | 1 | 0 | AACCTAAC | 2 | 685776 |
| chrXVI | 717058 | - | chrXVI:717058:717144:- | 0 | 1 | 0 | 0 | 1 | GTATGC | 0 | 1 | 1 | 0 | 1 | 1 | TACTAAC  | 0 | 717058 |
| chrXVI | 729395 | - | chrXVI:729395:729479:- | 1 | 0 | 0 | 1 | 0 | GTATGT | 0 | 1 | 1 | 0 | 1 | 0 | TACCAAC  | 1 | 729397 |
| chrXVI | 729414 | - | chrXVI:729414:729479:- | 1 | 1 | 1 | 1 | 0 | GTATGT | 1 | 0 | 0 | 0 | 0 | 0 | GACTAAC  | 1 | 729414 |
| chrXVI | 739748 | - | chrXVI:739748:739794:- | 1 | 0 | 0 | 0 | 2 | GTAAGC | 0 | 0 | 0 | 0 | 0 | 0 | TATTAAC  | 1 | 739750 |
| chrXVI | 739750 | - | chrXVI:739750:739794:- | 0 | 1 | 0 | 0 | 2 | GTAAGC | 0 | 1 | 0 | 0 | 0 | 0 | TATTAAC  | 1 | 739750 |
| chrXVI | 745392 | + | chrXVI:745342:745392:+ | 0 | 1 | 0 | 0 | 2 | TAATGT | 0 | 1 | 0 | 0 | 0 | 0 | CACTAAC  | 1 | 745392 |
| chrXVI | 777582 | - | chrXVI:777582:777639:- | 1 | 0 | 0 | 0 | 1 | GTAAGT | 0 | 1 | 1 | 0 | 1 | 0 | AACCTAGC | 2 | 777580 |
| chrXVI | 800194 | + | chrXVI:800147:800194:+ | 0 | 1 | 0 | 0 | 5 | AACCTC | 0 | 1 | 0 | 0 | 0 | 0 | TACTAAT  | 1 | 800194 |
| chrXVI | 824942 | - | chrXVI:824942:825021:- | 0 | 1 | 0 | 0 | 2 | GTGCGT | 0 | 1 | 0 | 0 | 0 | 0 | CACTAAC  | 1 | 824942 |
| chrXVI | 833779 | + | chrXVI:833690:833779:+ | 1 | 1 | 1 | 1 | 0 | GTATGT | 1 | 0 | 0 | 0 | 0 | 0 | AACCTAAC | 1 | 833779 |
| chrXVI | 841160 | + | chrXVI:841109:841160:+ | 0 | 1 | 0 | 0 | 2 | GAAAGT | 0 | 1 | 0 | 0 | 0 | 0 | AACCTAAC | 1 | 841160 |
| chrXVI | 883453 | + | chrXVI:883384:883453:+ | 1 | 1 | 1 | 1 | 0 | GTATGT | 1 | 0 | 0 | 0 | 0 | 0 | TACTAAC  | 0 | 883453 |
| chrXVI | 883586 | - | chrXVI:883586:883649:- | 1 | 0 | 0 | 0 | 1 | GTATAT | 0 | 0 | 0 | 0 | 0 | 0 | GACTAAC  | 1 | 883588 |
| chrXVI | 883588 | - | chrXVI:883588:883649:- | 0 | 1 | 0 | 0 | 1 | GTATAT | 0 | 1 | 1 | 0 | 1 | 0 | GACTAAC  | 1 | 883588 |
| chrXVI | 911328 | + | chrXVI:911273:911328:+ | 1 | 1 | 1 | 1 | 0 | GTATGT | 1 | 0 | 0 | 0 | 0 | 0 | TACTAAC  | 0 | 911328 |
| chrXVI | 937232 | - | chrXVI:937232:937285:- | 0 | 1 | 0 | 0 | 2 | GTATAC | 0 | 1 | 0 | 0 | 0 | 0 | TACTAAT  | 1 | 937232 |
| chrXVI | 937537 | - | chrXVI:937537:937617:- | 1 | 0 | 0 | 0 | 0 | GTATGT | 0 | 1 | 1 | 0 | 1 | 0 | TACTAAA  | 1 | 937535 |
| chrXVI | 939905 | - | chrXVI:939905:939951:- | 1 | 0 | 0 | 0 | 3 | GTACCG | 0 | 0 | 0 | 0 | 0 | 0 | TACTAAC  | 0 | 939907 |
| chrXVI | 939907 | - | chrXVI:939907:939951:- | 0 | 1 | 0 | 0 | 3 | GTACCG | 0 | 1 | 0 | 0 | 0 | 0 | TACTAAC  | 0 | 939907 |

totals

198 430 268 21 247 22

5ss\_bp\_pair is in the format chr:nt1:nt2:strand  
nt1 < nt2

On the plus strand, nt1 is the 5'ss and nt2 is the BP  
On the reverse strand, nt1 is the BP and nt2 is the 5'SS

In general 1=true, 0=false, except for 5ss\_mm, the number of mismatches at the 5'ss from GTATGT, and best\_bp\_mm from TACTAAC  
u\_a and u\_n are the union of annotated and novel BP, respectively, of both peak callers

lcnBP= low confidence novel BP (see supplemental methods for details)  
hcnBP = high confidence novel BP (see supplemental methods for details)

**Table S3. GTATGT motif frequency at 5'SS and generally in introns.**

| <b>No. mismatches from /GTATGT</b> | <b>0</b> | <b>1</b> | <b>2</b> | <b>3</b> | <b>4</b> | <b>5</b> | <b>6</b> | <b>total</b> | 0 or 1 mut | % 0 or 1 mut |
|------------------------------------|----------|----------|----------|----------|----------|----------|----------|--------------|------------|--------------|
| Annotated 5'SS                     | 216      | 73       | 6        | 18       | 7        | 7        | 3        | 330          | 289        | 87.58        |
| Annotated 5'SS, no chrM            | 216      | 73       | 6        | 1        | 2        | 0        | 0        | 298          | 289        | 96.98        |
| Arbitrary intron positions         | 10       | 24       | 130      | 471      | 982      | 973      | 390      | 2980         | 34         | 1.1          |

**Table S4. Branch-seq CPMs.**

| <b>bp_id</b>     | <b>branch_seq_cpm</b> | <b>gene_name</b> | <b>bp_type</b> |
|------------------|-----------------------|------------------|----------------|
| chrVII:497961:-  | 476.7266362           | YGR001C          | annotated      |
| chrXIII:123777:- | 1.126520145           | YML073C          | annotated      |
| chrV:433162:+    | 0.292060778           | YER133W          | annotated      |
| chrV:308040:+    | 205.9028487           | YER074W-A        | annotated      |
| chrV:307801:+    | 248.1264927           | YER074W-A        | annotated      |
| chrV:269803:-    | 0.083445937           | YER056C-A        | annotated      |
| chrV:348217:-    | 221.7575767           | YER093C-A        | annotated      |
| chrV:148254:+    | 301.9908448           | YEL003W          | annotated      |
| chrV:239667:-    | 0.75101343            | YER044C-A        | annotated      |
| chrV:131853:+    | 160.3830903           | YEL012W          | annotated      |
| chrV:159013:-    | 674.4517831           | YER003C          | annotated      |
| chrV:548611:+    | 1.376857955           | YER179W          | annotated      |
| chrV:166786:-    | 251.2557153           | YER007C-A        | annotated      |
| chrV:397225:+    | 0.333783747           | YER117W          | annotated      |
| chrII:462255:+   | 274.036456            | YBR111W-A        | annotated      |
| chrII:479389:+   | 247.9596008           | YBR119W          | annotated      |
| chrII:602175:+   | 2.711992942           | YBR186W          | annotated      |
| chrII:606615:+   | 0.917905303           | YBR191W          | annotated      |
| chrII:653429:+   | 196.306566            | YBR215W          | annotated      |
| chrII:170771:+   | 29.95709126           | YBL026W          | annotated      |
| chrII:110932:+   | 198.5178833           | YBL059W          | annotated      |
| chrII:333365:+   | 7.092904617           | YBR048W          | annotated      |
| chrII:110451:-   | 375.590161            | YBL059C-A        | annotated      |
| chrII:186375:-   | 513.1507876           | YBL018C          | annotated      |
| chrII:462472:+   | 79.1901939            | YBR111W-A        | annotated      |
| chrII:142787:-   | 241.9932163           | YBL040C          | annotated      |
| chrII:47071:-    | 44.47668425           | YBL091C-A        | annotated      |
| chrII:168770:+   | 0.166891873           | YBL027W          | annotated      |
| chrII:426524:-   | 0.458952652           | YBR090C          | annotated      |
| chrII:125234:+   | 112.1930619           | YBL050W          | annotated      |
| chrII:366534:-   | 129.0491411           | YBR062C          | annotated      |
| chrII:726947:-   | 120.9966082           | YBR255C-A        | annotated      |
| chrII:679973:-   | 102.6802251           | YBR230C          | annotated      |
| chrII:407047:-   | 2316.334033           | YBR082C          | annotated      |
| chrVI:64615:-    | 0.458952652           | YFL034C-A        | annotated      |
| chrVI:221291:-   | 3.00405372            | YFR031C-A        | annotated      |
| chrVI:242044:+   | 349.5967517           | YFR045W          | annotated      |
| chrVI:63915:-    | 332.3651658           | YFL034C-B        | annotated      |
| chrVI:203304:-   | 787.2289666           | YFR024C-A        | annotated      |
| chrXIV:62407:-   | 0.166891873           | YNL302C          | annotated      |
| chrXIV:534915:-  | 362.1970881           | YNL050C          | annotated      |
| chrXIV:494551:-  | 3.50472934            | YNL069C          | annotated      |
| chrXIV:623270:+  | 0.083445937           | YNL004W          | annotated      |
| chrXIV:351021:+  | 438.2163364           | YNL147W          | annotated      |

|                 |             |           |           |
|-----------------|-------------|-----------|-----------|
| chrXIV:545341:+ | 1186.726388 | YNL044W   | annotated |
| chrXIV:48377:+  | 87.78512538 | YNL312W   | annotated |
| chrXIV:331803:+ | 0.50067562  | YNL162W   | annotated |
| chrXIV:185553:+ | 134.3062351 | YNL246W   | annotated |
| chrXIV:145191:- | 172.9417038 | YNL265C   | annotated |
| chrXIV:609837:+ | 1.25168905  | YNL012W   | annotated |
| chrXIV:366096:+ | 225.1371371 | YNL138W-A | annotated |
| chrXIV:380726:- | 537.4335551 | YNL130C   | annotated |
| chrXIV:415872:+ | 0.292060778 | YNL112W   | annotated |
| chrXIV:557672:+ | 334.659929  | YNL038W   | annotated |
| chrXVI:96189:-  | 218.8369689 | YPL241C   | annotated |
| chrXVI:492958:- | 403.210766  | YPL031C   | annotated |
| chrXVI:623662:+ | 391.1528281 | YPR028W   | annotated |
| chrXVI:729414:- | 126.3788711 | YPR098C   | annotated |
| chrXVI:407002:+ | 9.679728654 | YPL079W   | annotated |
| chrXVI:305374:+ | 165.9322451 | YPL129W   | annotated |
| chrXVI:883453:+ | 202.1477816 | YPR170W-B | annotated |
| chrXVI:678219:- | 565.4713899 | YPR063C   | annotated |
| chrXVI:345483:- | 0.083445937 | YPL109C   | annotated |
| chrXVI:76014:-  | 0.166891873 | YPL249C-A | annotated |
| chrXVI:218711:+ | 254.3849379 | YPL175W   | annotated |
| chrXVI:654534:+ | 0.292060778 | YPR043W   | annotated |
| chrXVI:405426:+ | 0.083445937 | YPL081W   | annotated |
| chrXVI:911328:+ | 1047.663735 | YPR187W   | annotated |
| chrXVI:833779:+ | 136.8930591 | YPR153W   | annotated |
| chrXVI:412958:+ | 28.87229409 | YPL075W   | annotated |
| chrXVI:174036:+ | 0.792736398 | YPL198W   | annotated |
| chrXI:625594:+  | 630.6009434 | YKR095W-A | annotated |
| chrXI:447376:-  | 229.267711  | YKR004C   | annotated |
| chrXI:430163:-  | 132.1366407 | YKL006C-A | annotated |
| chrXI:283016:+  | 0.292060778 | YKL081W   | annotated |
| chrXI:437526:+  | 592.6330422 | YKL002W   | annotated |
| chrXI:449611:-  | 5.131925105 | YKR005C   | annotated |
| chrXI:83061:+   | 319.4727685 | YKL190W   | annotated |
| chrXI:618096:-  | 15.64611313 | YKR094C   | annotated |
| chrVII:543708:+ | 129.6332626 | YGR029W   | annotated |
| chrVII:946407:+ | 1.00135124  | YGR225W   | annotated |
| chrVII:497394:- | 401.9590769 | YGR001C   | annotated |
| chrVII:157245:- | 3.212668562 | YGL183C   | annotated |
| chrVII:435728:+ | 0.166891873 | YGL033W   | annotated |
| chrVII:346854:- | 32.08496265 | YGL087C   | annotated |
| chrVII:73034:-  | 19.65151809 | YGL226C-A | annotated |
| chrVII:311486:+ | 0.667567493 | YGL103W   | annotated |
| chrVII:556282:+ | 0.625844525 | YGR034W   | annotated |
| chrVII:62173:+  | 317.0945594 | YGL232W   | annotated |
| chrX:702871:-   | 0.166891873 | YJR145C   | annotated |
| chrX:387380:-   | 414.5594134 | YJL031C   | annotated |

|                  |             |           |           |
|------------------|-------------|-----------|-----------|
| chrX:435302:+    | 207.3214297 | YJL001W   | annotated |
| chrX:76268:+     | 0.083445937 | YJL189W   | annotated |
| chrX:74178:+     | 31.33394922 | YJL191W   | annotated |
| chrX:365853:+    | 441.0117753 | YJL041W   | annotated |
| chrX:608540:+    | 0.792736398 | YJR094W-A | annotated |
| chrX:396512:-    | 329.3193891 | YJL024C   | annotated |
| chrX:469190:-    | 15.47922125 | YJR021C   | annotated |
| chrX:50351:-     | 77.02059955 | YJL205C   | annotated |
| chrXV:93868:-    | 0.083445937 | YOL120C   | annotated |
| chrXV:240976:-   | 344.9655022 | YOL048C   | annotated |
| chrXV:778910:-   | 0.083445937 | YOR234C   | annotated |
| chrXV:867516:+   | 0.542398588 | YOR293W   | annotated |
| chrXV:242453:-   | 19.60979512 | YOL047C   | annotated |
| chrXV:92476:-    | 51.44441996 | YOL121C   | annotated |
| chrXV:900802:-   | 1.585472797 | YOR312C   | annotated |
| chrIX:166484:+   | 603.3141221 | YIL106W   | annotated |
| chrIX:232012:-   | 1.293412018 | YIL069C   | annotated |
| chrIX:225834:-   | 0.083445937 | YIL073C   | annotated |
| chrIX:317136:+   | 0.542398588 | YIL018W   | annotated |
| chrIX:47743:+    | 547.1132838 | YIL156W-B | annotated |
| chrIX:155276:+   | 275.329868  | YIL111W   | annotated |
| chrIX:348380:-   | 0.50067562  | YIL004C   | annotated |
| chrXII:522984:+  | 0.292060778 | YLR185W   | annotated |
| chrXII:766205:-  | 535.8063594 | YLR316C   | annotated |
| chrXII:564467:-  | 31.12533438 | YLR211C   | annotated |
| chrXII:548706:-  | 175.1530211 | YLR199C   | annotated |
| chrXII:1024631:+ | 1.919256543 | YLR445W   | annotated |
| chrXII:398583:+  | 89.28715224 | YLR128W   | annotated |
| chrXII:286498:-  | 113.0275212 | YLR078C   | annotated |
| chrXII:786667:+  | 10.84797177 | YLR329W   | annotated |
| chrXII:857038:+  | 81.40151122 | YLR367W   | annotated |
| chrXII:40353:-   | 2850.179413 | YLL050C   | annotated |
| chrXII:694444:+  | 310.5023304 | YLR275W   | annotated |
| chrXII:250899:-  | 1.710641702 | YLR054C   | annotated |
| chrXII:327295:-  | 10.51418802 | YLR093C   | annotated |
| chrXII:744219:+  | 171.6900147 | YLR306W   | annotated |
| chrXII:766086:-  | 482.1506221 | YLR316C   | annotated |
| chrXII:987191:+  | 193.8031879 | YLR426W   | annotated |
| chrXII:242652:+  | 0.584121557 | YLR048W   | annotated |
| chrXII:263540:+  | 0.166891873 | YLR061W   | annotated |
| chrXIII:337886:+ | 835.6276098 | YMR033W   | annotated |
| chrXIII:666961:- | 225.4291979 | YMR201C   | annotated |
| chrXIII:223421:- | 0.292060778 | YML026C   | annotated |
| chrXIII:499898:- | 0.208614842 | YMR116C   | annotated |
| chrXIII:732835:+ | 0.083445937 | YMR230W   | annotated |
| chrXIII:651593:+ | 0.166891873 | YMR194W   | annotated |
| chrXIII:854879:+ | 223.6768332 | YMR292W   | annotated |

|                  |             |           |           |
|------------------|-------------|-----------|-----------|
| chrXIII:425113:+ | 0.083445937 | YMR079W   | annotated |
| chrXIII:82343:+  | 217.2932191 | YML094W   | annotated |
| chrXIII:206162:+ | 118.4515071 | YML036W   | annotated |
| chrXIII:140113:- | 99.59272542 | YML067C   | annotated |
| chrXIII:537527:+ | 1.543749828 | YMR133W   | annotated |
| chrXIII:517842:+ | 0.083445937 | YMR125W   | annotated |
| chrXIII:721231:- | 1.460303892 | YMR225C   | annotated |
| chrXIII:753788:- | 0.125168905 | YMR242C   | annotated |
| chrXIII:652797:- | 114.9885007 | YMR194C-B | annotated |
| chrXIII:211547:+ | 59.9559055  | YML034W   | annotated |
| chrXIII:99301:-  | 437.2984311 | YML085C   | annotated |
| chrXIII:225264:- | 634.5646254 | YML025C   | annotated |
| chrIII:111588:-  | 118.2428923 | YCL002C   | annotated |
| chrIII:177952:-  | 1.919256543 | YCR031C   | annotated |
| chrIII:173137:-  | 618.2926678 | YCR028C-A | annotated |
| chrIII:101646:-  | 93.66806391 | YCL012C   | annotated |
| chrIII:107089:+  | 297.6099331 | YCL005W-A | annotated |
| chrIII:107255:+  | 352.4339135 | YCL005W-A | annotated |
| chrIV:1212941:+  | 276.3312193 | YDR367W   | annotated |
| chrIV:1266790:-  | 144.945592  | YDR397C   | annotated |
| chrIV:1237581:+  | 3.379560435 | YDR381W   | annotated |
| chrIV:1103871:+  | 150.8285305 | YDR318W   | annotated |
| chrIV:1073346:-  | 150.9119765 | YDR305C   | annotated |
| chrIV:1450485:-  | 1.960979512 | YDR500C   | annotated |
| chrIV:491873:+   | 0.166891873 | YDR025W   | annotated |
| chrIV:65358:+    | 205.9862947 | YDL219W   | annotated |
| chrIV:1238769:-  | 150.7868076 | YDR381C-A | annotated |
| chrIV:1319751:-  | 113.277859  | YDR424C   | annotated |
| chrIV:254999:-   | 439.1342417 | YDL115C   | annotated |
| chrIV:267780:+   | 101.5537049 | YDL108W   | annotated |
| chrIV:239421:-   | 415.2687038 | YDL125C   | annotated |
| chrIV:217970:+   | 0.417229683 | YDL136W   | annotated |
| chrIV:431423:-   | 1294.872322 | YDL012C   | annotated |
| chrIV:337596:+   | 331.6975983 | YDL064W   | annotated |
| chrIV:715265:-   | 166.4746437 | YDR129C   | annotated |
| chrIV:579963:+   | 20.65286933 | YDR064W   | annotated |
| chrIV:399468:+   | 10.38901912 | YDL029W   | annotated |
| chrIV:630016:+   | 0.709290462 | YDR092W   | annotated |
| chrIV:733713:-   | 307.7903374 | YDR139C   | annotated |
| chrIV:569665:-   | 153.7491383 | YDR059C   | annotated |
| chrIV:458048:-   | 576.6531454 | YDR005C   | annotated |
| chrIV:307375:-   | 0.25033781  | YDL083C   | annotated |
| chrIV:230262:+   | 0.083445937 | YDL130W   | annotated |
| chrIV:1319627:-  | 157.2538677 | YDR424C   | annotated |
| chrI:151022:-    | 100.4271848 | YAL001C   | annotated |
| chrI:87439:+     | 179.6173787 | YAL030W   | annotated |
| chrVIII:354926:+ | 255.67835   | YHR123W   | annotated |

|                  |             |                      |           |
|------------------|-------------|----------------------|-----------|
| chrVIII:129611:+ | 89.12026036 | YHR012W              | annotated |
| chrVIII:187613:- | 1389.917244 | YHR039C-A            | annotated |
| chrVIII:498731:- | 30.45776688 | YHR199C-A            | annotated |
| chrVIII:382356:- | 0.083445937 | YHR141C              | annotated |
| chrVIII:298418:- | 198.976836  | YHR097C              | annotated |
| chrVIII:104751:+ | 0.292060778 | YHL001W              | annotated |
| chrVIII:255689:- | 528.1293332 | YHR077C              | annotated |
| chrVIII:107875:+ | 674.0345535 | YHR001W-A            | annotated |
| chrVIII:315810:- | 286.3864547 | YHR101C              | annotated |
| chrVIII:189778:- | 151.7881588 | YHR041C              | annotated |
| chrVIII:251233:+ | 92.41637486 | YHR076W              | annotated |
| chrVIII:262372:- | 0.083445937 | YHR079C-A            | annotated |
| chrVIII:138274:- | 0.083445937 | YHR016C              | annotated |
| chrV:151105:+    | 0.625844525 | not_in_intron_or_TIF | cnBP      |
| chrV:166806:-    | 0.625844525 | YER007C-A            | cnBP      |
| chrV:540383:-    | 1.084797177 | YER175C              | cnBP      |
| chrII:115534:+   | 15.47922125 | YBL056W              | cnBP      |
| chrII:170731:+   | 24.44965944 | YBL026W              | cnBP      |
| chrII:221024:+   | 3.087499657 | not_in_intron_or_TIF | cnBP      |
| chrII:606346:+   | 0.709290462 | YBR191W              | cnBP      |
| chrII:291715:-   | 1.00135124  | YBR025C              | cnBP      |
| chrII:592709:-   | 6.425337124 | YBR181C              | cnBP      |
| chrXVI:218695:+  | 0.876182335 | YPL175W              | cnBP      |
| chrXVI:335968:+  | 1.335134987 | YPL114W              | cnBP      |
| chrXVI:76164:-   | 0.667567493 | YPL249C-A            | cnBP      |
| chrXVI:281450:-  | 0.667567493 | snR17b               | cnBP      |
| chrXVI:602284:-  | 4.839864327 | not_in_intron_or_TIF | cnBP      |
| chrXVI:729395:-  | 1.460303892 | YPR098C              | cnBP      |
| chrXVI:777582:-  | 0.834459367 | not_in_intron_or_TIF | cnBP      |
| chrXVI:937537:-  | 1.25168905  | not_in_intron_or_TIF | cnBP      |
| chrXI:96757:+    | 2.795438878 | YKL184W              | cnBP      |
| chrXI:468921:-   | 0.917905303 | YKR015C              | cnBP      |
| chrVII:439462:+  | 5.25709401  | YGL030W              | cnBP      |
| chrVII:543691:+  | 2.419932163 | YGR029W              | cnBP      |
| chrVII:555885:+  | 0.542398588 | YGR034W              | cnBP      |
| chrVII:143935:-  | 6.174999314 | not_in_intron_or_TIF | cnBP      |
| chrVII:497408:-  | 1.543749828 | YGR001C              | cnBP      |
| chrVII:859434:-  | 5.799492599 | YGR183C              | cnBP      |
| chrXIII:182669:+ | 0.959628272 | YML046W              | cnBP      |
| chrXIII:425094:+ | 0.375506715 | YMR079W              | cnBP      |
| chrXIII:652808:- | 3.50472934  | YMR194C-B            | cnBP      |
| chrXV:505980:+   | 4.965033232 | YOR096W              | cnBP      |
| chrXV:930113:+   | 2.086148417 | YOR326W              | cnBP      |
| chrXV:117635:-   | 0.792736398 | not_in_intron_or_TIF | cnBP      |
| chrXV:349520:-   | 1.209966082 | not_in_intron_or_TIF | cnBP      |
| chrIX:155301:+   | 1.084797177 | YIL111W              | cnBP      |
| chrIX:166501:+   | 0.709290462 | YIL106W              | cnBP      |

|                  |             |                      |      |
|------------------|-------------|----------------------|------|
| chrXII:382387:+  | 3.713344182 | YLR116W              | cnBP |
| chrXII:286519:-  | 3.212668562 | YLR078C              | cnBP |
| chrX:435281:+    | 1.376857955 | YJL001W              | cnBP |
| chrIV:107156:+   | 1.710641702 | YDL195W              | cnBP |
| chrIV:392638:+   | 0.50067562  | not_in_intron_or_TIF | cnBP |
| chrIV:438275:+   | 1.75236467  | YDL007W              | cnBP |
| chrIV:655244:+   | 1.960979512 | YDR100W              | cnBP |
| chrIV:1145148:+  | 30.37432095 | YDR336W              | cnBP |
| chrIV:22303:-    | 3.75506715  | not_in_intron_or_TIF | cnBP |
| chrIV:451430:-   | 4.130573865 | YDR001C              | cnBP |
| chrVIII:129590:+ | 0.75101343  | YHR012W              | cnBP |
| chrVIII:406673:- | 0.959628272 | not_in_intron_or_TIF | cnBP |
| chrV:61194:+     | 0.166891873 | not_in_intron_or_TIF | cnBP |
| chrV:124638:-    | 0.667567493 | YEL016C              | cnBP |
| chrV:160514:+    | 0.375506715 | YER004W, YER005W     | cnBP |
| chrV:201997:+    | 46.43766376 | YER023W              | cnBP |
| chrV:203928:+    | 0.333783747 | YER024W              | cnBP |
| chrV:305684:+    | 9.26249897  | YER073W              | cnBP |
| chrV:336936:+    | 1.543749828 | YER088W-B            | cnBP |
| chrV:362830:+    | 1.75236467  | YER102W              | cnBP |
| chrV:374671:-    | 2.461655132 | YER107C              | cnBP |
| chrV:487859:+    | 0.625844525 | not_in_intron_or_TIF | cnBP |
| chrV:517901:+    | 395.3668479 | YER167W              | cnBP |
| chrV:561245:+    | 0.083445937 | not_in_intron_or_TIF | cnBP |
| chrII:13949:-    | 0.959628272 | not_in_intron_or_TIF | cnBP |
| chrII:76231:+    | 0.75101343  | not_in_intron_or_TIF | cnBP |
| chrII:167927:+   | 0.166891873 | not_in_intron_or_TIF | cnBP |
| chrII:206284:+   | 0.125168905 | not_in_intron_or_TIF | cnBP |
| chrII:290470:-   | 0.083445937 | YBR025C              | cnBP |
| chrII:331391:-   | 5.090202137 | YBR046C              | cnBP |
| chrII:341038:-   | 0.75101343  | not_in_intron_or_TIF | cnBP |
| chrII:342756:+   | 5.50743182  | not_in_intron_or_TIF | cnBP |
| chrII:431594:-   | 0.50067562  | not_in_intron_or_TIF | cnBP |
| chrII:443734:-   | 32.29357749 | YBR101C              | cnBP |
| chrII:519067:-   | 0.292060778 | not_in_intron_or_TIF | cnBP |
| chrII:756982:-   | 0.25033781  | not_in_intron_or_TIF | cnBP |
| chrVI:32028:-    | 0.625844525 | not_in_intron_or_TIF | cnBP |
| chrVI:96258:+    | 1.209966082 | YFL021W              | cnBP |
| chrVI:109969:-   | 0.292060778 | not_in_intron_or_TIF | cnBP |
| chrVI:176327:-   | 3.75506715  | YFR015C              | cnBP |
| chrVI:268722:+   | 0.375506715 | not_in_intron_or_TIF | cnBP |
| chrXIV:69244:+   | 0.834459367 | YNL298W              | cnBP |
| chrXIV:217113:-  | 0.542398588 | YNL231C              | cnBP |
| chrXIV:250194:-  | 0.083445937 | YNL211C              | cnBP |
| chrXIV:273231:+  | 0.125168905 | not_in_intron_or_TIF | cnBP |
| chrXIV:349280:-  | 0.125168905 | YNL149C              | cnBP |
| chrXIV:359077:-  | 0.083445937 | not_in_intron_or_TIF | cnBP |



|                 |             |                      |      |
|-----------------|-------------|----------------------|------|
| chrXIV:369425:- | 0.125168905 | YNL137C              | cnBP |
| chrXIV:373658:+ | 2.086148417 | not_in_intron_or_TIF | cnBP |
| chrXIV:380702:- | 16.6057414  | YNL130C              | cnBP |
| chrXIV:394037:+ | 0.584121557 | YNL124W              | cnBP |
| chrXIV:427177:+ | 1.710641702 | not_in_intron_or_TIF | cnBP |
| chrXIV:429575:- | 8.886992255 | not_in_intron_or_TIF | cnBP |
| chrXIV:429599:- | 0.458952652 | not_in_intron_or_TIF | cnBP |
| chrXIV:583910:- | 3.546452309 | YNL025C              | cnBP |
| chrXIV:611579:+ | 4.464357612 | YNL012W              | cnBP |
| chrXIV:726914:- | 0.125168905 | not_in_intron_or_TIF | cnBP |
| chrXVI:101222:+ | 0.208614842 | YPL237W              | cnBP |
| chrXVI:115269:+ | 65.7553981  | YPL230W              | cnBP |
| chrXVI:146507:- | 10.9314177  | not_in_intron_or_TIF | cnBP |
| chrXVI:159662:+ | 0.208614842 | YPL208W              | cnBP |
| chrXVI:196570:- | 0.125168905 | YPL184C              | cnBP |
| chrXVI:339245:+ | 0.083445937 | not_in_intron_or_TIF | cnBP |
| chrXVI:339305:+ | 0.083445937 | not_in_intron_or_TIF | cnBP |
| chrXVI:445519:- | 3.629898245 | not_in_intron_or_TIF | cnBP |
| chrXVI:481183:- | 4.00540496  | YPL037C              | cnBP |
| chrXVI:490809:- | 0.333783747 | YPL032C              | cnBP |
| chrXVI:513415:- | 0.125168905 | YPL020C              | cnBP |
| chrXVI:560470:+ | 0.50067562  | not_in_intron_or_TIF | cnBP |
| chrXVI:579895:- | 0.333783747 | YPR010C              | cnBP |
| chrXVI:590144:- | 0.125168905 | YPR015C              | cnBP |
| chrXVI:616651:+ | 0.125168905 | not_in_intron_or_TIF | cnBP |
| chrXVI:617122:+ | 0.125168905 | not_in_intron_or_TIF | cnBP |
| chrXVI:685775:+ | 0.083445937 | YPR070W              | cnBP |
| chrXVI:717057:- | 0.417229683 | YPR091C              | cnBP |
| chrXVI:883587:- | 2.044425448 | not_in_intron_or_TIF | cnBP |
| chrXI:93384:-   | 13.39307284 | YKL186C              | cnBP |
| chrXI:94081:-   | 5.215371042 | not_in_intron_or_TIF | cnBP |
| chrXI:158626:-  | 0.083445937 | not_in_intron_or_TIF | cnBP |
| chrXI:166478:+  | 4.464357612 | YKL150W              | cnBP |
| chrXI:191089:-  | 0.083445937 | YKL134C              | cnBP |
| chrXI:193010:-  | 38.80236055 | YKL133C              | cnBP |
| chrXI:225774:-  | 3.671621214 | not_in_intron_or_TIF | cnBP |
| chrXI:231492:+  | 0.458952652 | YKL109W              | cnBP |
| chrXI:272947:-  | 0.834459367 | not_in_intron_or_TIF | cnBP |
| chrXI:285868:+  | 0.625844525 | YKL080W              | cnBP |
| chrXI:290610:-  | 0.959628272 | not_in_intron_or_TIF | cnBP |
| chrXI:408146:+  | 25.74307146 | YKL015W              | cnBP |
| chrXI:446830:-  | 0.292060778 | YKR004C              | cnBP |
| chrXI:490071:+  | 6.717397902 | not_in_intron_or_TIF | cnBP |
| chrXI:633804:-  | 0.208614842 | YKR098C              | cnBP |
| chrXI:649449:+  | 0.083445937 | not_in_intron_or_TIF | cnBP |
| chrVII:51958:+  | 0.375506715 | YGL238W              | cnBP |
| chrVII:59556:+  | 0.125168905 | YGL233W              | cnBP |

|                  |             |                      |      |
|------------------|-------------|----------------------|------|
| chrVII:140633:+  | 0.083445937 | not_in_intron_or_TIF | cnBP |
| chrVII:167430:+  | 6.00810744  | YGL178W              | cnBP |
| chrVII:253205:-  | 95.17009077 | YGL136C              | cnBP |
| chrVII:262616:-  | 0.083445937 | not_in_intron_or_TIF | cnBP |
| chrVII:293422:+  | 0.083445937 | YGL114W              | cnBP |
| chrVII:293817:+  | 0.75101343  | YGL114W              | cnBP |
| chrVII:345543:-  | 0.125168905 | not_in_intron_or_TIF | cnBP |
| chrVII:380660:-  | 0.083445937 | YGL065C              | cnBP |
| chrVII:383554:+  | 94.46080031 | YGL063W              | cnBP |
| chrVII:414313:+  | 0.041722968 | YGL045W              | cnBP |
| chrVII:423867:-  | 0.333783747 | not_in_intron_or_TIF | cnBP |
| chrVII:427172:-  | 0.375506715 | YGL037C              | cnBP |
| chrVII:436364:+  | 39.9288807  | not_in_intron_or_TIF | cnBP |
| chrVII:504217:-  | 0.125168905 | not_in_intron_or_TIF | cnBP |
| chrVII:574777:+  | 1.919256543 | not_in_intron_or_TIF | cnBP |
| chrVII:593472:+  | 0.292060778 | not_in_intron_or_TIF | cnBP |
| chrVII:594140:-  | 1.043074208 | not_in_intron_or_TIF | cnBP |
| chrVII:607018:-  | 0.375506715 | not_in_intron_or_TIF | cnBP |
| chrVII:658296:+  | 0.083445937 | YGR089W              | cnBP |
| chrVII:682969:-  | 0.083445937 | not_in_intron_or_TIF | cnBP |
| chrVII:730063:+  | 0.083445937 | not_in_intron_or_TIF | cnBP |
| chrVII:772104:+  | 0.417229683 | YGR141W              | cnBP |
| chrVII:792327:-  | 0.625844525 | YGR150C              | cnBP |
| chrVII:875660:+  | 0.125168905 | not_in_intron_or_TIF | cnBP |
| chrVII:914790:-  | 0.667567493 | YGR210C              | cnBP |
| chrVII:962303:+  | 0.667567493 | not_in_intron_or_TIF | cnBP |
| chrVII:1002936:+ | 0.166891873 | not_in_intron_or_TIF | cnBP |
| chrVII:1052638:- | 0.333783747 | not_in_intron_or_TIF | cnBP |
| chrXIII:56618:+  | 0.25033781  | YML106W              | cnBP |
| chrXIII:112660:- | 0.208614842 | YML076C              | cnBP |
| chrXIII:204536:- | 0.584121557 | not_in_intron_or_TIF | cnBP |
| chrXIII:242968:- | 0.50067562  | YML015C              | cnBP |
| chrXIII:273520:- | 0.458952652 | not_in_intron_or_TIF | cnBP |
| chrXIII:301516:- | 0.417229683 | YMR015C              | cnBP |
| chrXIII:493957:+ | 0.125168905 | not_in_intron_or_TIF | cnBP |
| chrXIII:551142:- | 6.049830409 | YMR142C              | cnBP |
| chrXIII:559830:+ | 128.5484654 | not_in_intron_or_TIF | cnBP |
| chrXIII:637453:+ | 0.667567493 | YMR189W              | cnBP |
| chrXIII:647112:+ | 1.168243113 | YMR192W              | cnBP |
| chrXIII:649541:- | 0.125168905 | not_in_intron_or_TIF | cnBP |
| chrXIII:653956:- | 0.166891873 | not_in_intron_or_TIF | cnBP |
| chrXIII:701813:+ | 0.166891873 | YMR217W              | cnBP |
| chrXIII:810474:- | 0.292060778 | YMR272C              | cnBP |
| chrXIII:845438:- | 0.083445937 | not_in_intron_or_TIF | cnBP |
| chrXV:87614:+    | 0.667567493 | YOL123W              | cnBP |
| chrXV:139434:+   | 0.208614842 | not_in_intron_or_TIF | cnBP |
| chrXV:418633:+   | 0.125168905 | not_in_intron_or_TIF | cnBP |

|                 |             |                      |      |
|-----------------|-------------|----------------------|------|
| chrXV:423675:-  | 1.293412018 | YOR049C              | cnBP |
| chrXV:437796:-  | 0.458952652 | not_in_intron_or_TIF | cnBP |
| chrXV:506801:-  | 16.68918733 | YOR097C              | cnBP |
| chrXV:518764:-  | 2.711992942 | not_in_intron_or_TIF | cnBP |
| chrXV:527237:+  | 0.417229683 | YOR109W              | cnBP |
| chrXV:605429:+  | 0.292060778 | not_in_intron_or_TIF | cnBP |
| chrXV:674437:-  | 0.083445937 | YOR180C              | cnBP |
| chrXV:720499:+  | 2.75371591  | not_in_intron_or_TIF | cnBP |
| chrXV:733355:-  | 7.76047211  | YOR207C              | cnBP |
| chrXV:754237:-  | 0.166891873 | not_in_intron_or_TIF | cnBP |
| chrXV:819159:+  | 0.125168905 | YOR264W              | cnBP |
| chrXV:845022:+  | 13.05928909 | not_in_intron_or_TIF | cnBP |
| chrXV:1059709:- | 0.125168905 | not_in_intron_or_TIF | cnBP |
| chrXV:1062512:- | 1.877533575 | not_in_intron_or_TIF | cnBP |
| chrIX:54026:+   | 0.834459367 | YIL153W              | cnBP |
| chrIX:127053:-  | 1.126520145 | not_in_intron_or_TIF | cnBP |
| chrIX:134040:+  | 8.636654445 | YIL121W              | cnBP |
| chrIX:225116:+  | 0.166891873 | not_in_intron_or_TIF | cnBP |
| chrIX:261766:+  | 1.710641702 | not_in_intron_or_TIF | cnBP |
| chrIX:334600:-  | 0.208614842 | not_in_intron_or_TIF | cnBP |
| chrIX:360694:-  | 0.166891873 | not_in_intron_or_TIF | cnBP |
| chrXII:50297:+  | 1.877533575 | YLL043W              | cnBP |
| chrXII:90638:+  | 0.25033781  | YLL026W              | cnBP |
| chrXII:155741:- | 0.792736398 | YLR002C              | cnBP |
| chrXII:232370:+ | 0.166891873 | not_in_intron_or_TIF | cnBP |
| chrXII:316897:+ | 0.292060778 | YLR088W              | cnBP |
| chrXII:331859:- | 0.584121557 | YLR095C              | cnBP |
| chrXII:380684:+ | 0.458952652 | YLR115W              | cnBP |
| chrXII:382366:+ | 1.418580923 | YLR116W              | cnBP |
| chrXII:491545:+ | 3.838513087 | not_in_intron_or_TIF | cnBP |
| chrXII:522715:+ | 14.56131595 | YLR185W              | cnBP |
| chrXII:609447:- | 7.885641015 | YLR233C              | cnBP |
| chrXII:791911:- | 0.083445937 | not_in_intron_or_TIF | cnBP |
| chrXII:823170:+ | 0.292060778 | not_in_intron_or_TIF | cnBP |
| chrXII:918954:- | 0.458952652 | YLR398C              | cnBP |
| chrXII:928301:- | 0.667567493 | not_in_intron_or_TIF | cnBP |
| chrXII:965102:+ | 0.083445937 | not_in_intron_or_TIF | cnBP |
| chrXII:982469:- | 71.84695147 | not_in_intron_or_TIF | cnBP |
| chrXII:987203:+ | 7.969086952 | YLR426W              | cnBP |
| chrXII:987240:+ | 0.542398588 | YLR426W              | cnBP |
| chrIII:84709:+  | 0.083445937 | not_in_intron_or_TIF | cnBP |
| chrIII:120379:+ | 0.125168905 | not_in_intron_or_TIF | cnBP |
| chrIII:169189:- | 0.208614842 | not_in_intron_or_TIF | cnBP |
| chrIII:228656:+ | 0.834459367 | YCR063W              | cnBP |
| chrIII:290580:+ | 0.166891873 | YCR095W-A            | cnBP |
| chrX:31820:+    | 12.18310675 | YJL213W              | cnBP |
| chrX:209415:+   | 0.333783747 | YJL111W              | cnBP |

|                  |             |                      |      |
|------------------|-------------|----------------------|------|
| chrX:237005:+    | 0.25033781  | YJL100W              | cnBP |
| chrX:349225:+    | 0.50067562  | not_in_intron_or_TIF | cnBP |
| chrX:422631:+    | 4.631249485 | not_in_intron_or_TIF | cnBP |
| chrX:455748:+    | 0.083445937 | not_in_intron_or_TIF | cnBP |
| chrX:506239:+    | 0.125168905 | not_in_intron_or_TIF | cnBP |
| chrX:535286:-    | 0.125168905 | not_in_intron_or_TIF | cnBP |
| chrX:632996:-    | 59.1631691  | YJR109C              | cnBP |
| chrX:649521:-    | 0.125168905 | not_in_intron_or_TIF | cnBP |
| chrX:712053:-    | 0.125168905 | not_in_intron_or_TIF | cnBP |
| chrIV:104615:+   | 0.625844525 | not_in_intron_or_TIF | cnBP |
| chrIV:122159:+   | 465.4614348 | YDL189W              | cnBP |
| chrIV:130328:+   | 0.208614842 | YDL185W              | cnBP |
| chrIV:188133:-   | 0.166891873 | YDL148C              | cnBP |
| chrIV:232837:+   | 1.00135124  | YDL128W              | cnBP |
| chrIV:235107:+   | 4.631249485 | YDL127W              | cnBP |
| chrIV:247245:-   | 0.125168905 | YDL119C              | cnBP |
| chrIV:268933:-   | 2.127871385 | not_in_intron_or_TIF | cnBP |
| chrIV:331277:+   | 31.87634781 | YDL070W              | cnBP |
| chrIV:333709:+   | 0.25033781  | not_in_intron_or_TIF | cnBP |
| chrIV:381064:-   | 0.166891873 | YDL040C              | cnBP |
| chrIV:392681:+   | 0.584121557 | not_in_intron_or_TIF | cnBP |
| chrIV:456688:-   | 1.376857955 | YDR005C              | cnBP |
| chrIV:540585:+   | 1.293412018 | YDR041W              | cnBP |
| chrIV:676357:+   | 1.335134987 | YDR110W              | cnBP |
| chrIV:698041:-   | 0.125168905 | YDR123C              | cnBP |
| chrIV:721691:-   | 0.125168905 | not_in_intron_or_TIF | cnBP |
| chrIV:768400:-   | 1.50202686  | not_in_intron_or_TIF | cnBP |
| chrIV:929253:+   | 2.086148417 | YDR232W              | cnBP |
| chrIV:1021386:+  | 0.125168905 | YDR280W              | cnBP |
| chrIV:1080238:-  | 0.125168905 | YDR309C              | cnBP |
| chrIV:1081204:+  | 0.50067562  | not_in_intron_or_TIF | cnBP |
| chrIV:1111887:+  | 0.458952652 | not_in_intron_or_TIF | cnBP |
| chrIV:1114334:+  | 2.378209195 | not_in_intron_or_TIF | cnBP |
| chrIV:1333316:-  | 0.125168905 | YDR435C              | cnBP |
| chrIV:1490517:-  | 1.084797177 | not_in_intron_or_TIF | cnBP |
| chrIV:1519505:-  | 0.125168905 | YDR541C              | cnBP |
| chrI:126071:+    | 0.166891873 | YAL016W              | cnBP |
| chrI:134871:-    | 0.083445937 | YAL010C              | cnBP |
| chrI:142343:+    | 4.297465739 | YAL003W              | cnBP |
| chrVIII:97941:-  | 0.166891873 | YHL007C              | cnBP |
| chrVIII:148769:- | 5.674323694 | not_in_intron_or_TIF | cnBP |
| chrVIII:335607:- | 0.75101343  | YHR112C              | cnBP |
| chrVIII:372283:+ | 0.292060778 | YHR134W              | cnBP |
| chrVIII:400568:- | 0.25033781  | YHR151C              | cnBP |
| chrVIII:442922:+ | 0.083445937 | YHR169W              | cnBP |
| chrVIII:491866:- | 0.083445937 | not_in_intron_or_TIF | cnBP |

The format of the bp\_id is chromosome:bp\_nucleotide:strand\_of\_bp

Branch\_seq\_cpm are the counts per million calculated from all data (top, middle, and bottom slices of gel arc combined).

If the gene\_name is “not\_in\_intron\_or\_TIF” it did not fall inside a gene according to Pelechano et al. (2013).

Bp\_type is “annotated” if the peak fell within 3nt of an annotated BP location according to Meyer et al. (2011).

**Table S5. Saccar 3 coordinates of lariat junction reads\***

\*List of BPs detected through LJ reads from the Lariat-seq data. BP positions were determined from locations of the 3' most end of LJ reads and sequence information as described in the methods. The 'reads\_at\_dist\_to\_bp' field represents the number of LJ reads ending at various positions from the reported BP, the first in the list is zero away. The final two fields are marked 1, if the 5'SS or BP was previously annotated in the SGD annotations or by Meyer et al.<sup>7</sup> respectively, or 0 otherwise.

| strand | chrom   | 5'ss    | bp      | reads_at_dist_to_bp | bp_seq       | anno_5'ss | anno_bp |
|--------|---------|---------|---------|---------------------|--------------|-----------|---------|
| -      | chrII   | 47146   | 47074   | 2,0,2               | GTTACTAATATG | 1         | 1       |
| +      | chrII   | 125155  | 125231  | 49                  | ATTACTAACATT | 1         | 1       |
| +      | chrII   | 170677  | 170768  | 0,11                | AGTACTAACGTT | 1         | 1       |
| -      | chrIII  | 178213  | 177956  | 1,6                 | GATACTAACAAC | 1         | 1       |
| +      | chrIV   | 122078  | 122159  | 19                  | CGTACTAACAAC | 1         | 0       |
| -      | chrIV   | 215384  | 215274  | 19                  | TTTACTAACGAG | 0         | 0       |
| +      | chrIV   | 230020  | 230262  | 122,12,5            | TTTACTAACAAA | 1         | 1       |
| -      | chrIV   | 239509  | 239421  | 4,9,353             | AATACTAACAAT | 1         | 1       |
| +      | chrIV   | 331189  | 331277  | 23                  | ATCACTAACCTG | 0         | 0       |
| +      | chrIV   | 399362  | 399470  | 100,5,0,0,0,0,3     | AATACTAACCAT | 1         | 1       |
| -      | chrIV   | 715358  | 715267  | 109                 | TATACTAACAAA | 1         | 1       |
| -      | chrIX   | 99385   | 99153   | 1,6,33              | AATACTAACAAA | 1         | 1       |
| +      | chrIX   | 225875  | 225994  | 2                   | TTTACTAATATT | 0         | 0       |
| +      | chrIX   | 317018  | 317138  | 5                   | TTTACTAACAGG | 0         | 1       |
| -      | chrIX   | 348494  | 348383  | 1,16                | TTTACTAACTAT | 1         | 1       |
| -      | chrV    | 166874  | 166787  | 4                   | ATTACTAACATC | 1         | 1       |
| -      | chrV    | 248671  | 248563  | 2                   | CATTCTAACATT | 0         | 0       |
| +      | chrV    | 362733  | 362835  | 2                   | AATTCTAACGCA | 1         | 0       |
| -      | chrV    | 505180  | 505049  | 0,0,2               | AGTACTAACCAG | 0         | 0       |
| -      | chrVI   | 221414  | 221303  | 30,0,0,0,0,0,0,0,8  | TATACTAACAGA | 1         | 1       |
| -      | chrVII  | 73137   | 73035   | 10                  | ATTACTAACAAG | 1         | 1       |
| +      | chrVII  | 249887  | 250015  | 35                  | GTTACTAACAGG | 1         | 1       |
| -      | chrVII  | 497458  | 497390  | 0,0,5               | CTTACTAACTGT | 1         | 1       |
| -      | chrVII  | 1061028 | 1060825 | 10                  | GATACTAACTTT | 0         | 0       |
| +      | chrVII  | 1084883 | 1085006 | 14                  | CTTACTAACTGA | 1         | 1       |
| +      | chrVIII | 129529  | 129617  | 2                   | AATACTAACATA | 1         | 1       |
| -      | chrVIII | 138408  | 138281  | 5,65                | TGTACTAACAAC | 1         | 1       |
| +      | chrVIII | 251156  | 251231  | 0,1                 | GAGACTAACTTT | 1         | 1       |
| -      | chrVIII | 505516  | 505289  | 15                  | TTTACTAACAAG | 1         | 1       |
| +      | chrX    | 73797   | 74179   | 2                   | TTTACTAACAAC | 1         | 1       |
| +      | chrX    | 236903  | 237010  | 3                   | ATCACTGACATA | 0         | 0       |
| +      | chrX    | 435228  | 435309  | 2                   | ATTACTAACTAA | 1         | 1       |
| +      | chrX    | 608307  | 608548  | 32,3,3              | TTTACTAACAAA | 1         | 1       |

|   |         |        |        |                            |               |   |   |
|---|---------|--------|--------|----------------------------|---------------|---|---|
| - | chrX    | 703054 | 702881 | 5                          | TTTACTAACGAG  | 1 | 1 |
| - | chrXI   | 355283 | 355153 | 0,4                        | CATACTTACAGT  | 0 | 0 |
| - | chrXI   | 430596 | 430520 | 3,5                        | GCTACTAACTAT  | 1 | 1 |
| - | chrXII  | 327399 | 327294 | 5                          | TAGACTAACGTT  | 1 | 1 |
| + | chrXII  | 382301 | 382388 | 6                          | TTTACTTACTAG  | 0 | 0 |
| - | chrXII  | 707892 | 707769 | 0,0,2                      | CGTACTGACATT  | 0 | 0 |
| - | chrXIII | 23658  | 23500  | 3,30                       | TTTACTAACAGT  | 1 | 1 |
| + | chrXIII | 236592 | 236788 | 72,2,1                     | GCCACTAACAAAT | 1 | 1 |
| - | chrXIII | 243056 | 242969 | 0,0,4                      | AATACTGACAAT  | 0 | 0 |
| + | chrXIII | 424998 | 425114 | 255,10,6                   | TTTACTAACAAA  | 1 | 1 |
| - | chrXIII | 500151 | 499899 | 2,42                       | CTTACTAACAAA  | 1 | 1 |
| - | chrXIII | 721345 | 721232 | 313                        | AATACTAACAGC  | 1 | 1 |
| + | chrXIV  | 48294  | 48378  | 10,0,3                     | ATTACTAACAAAT | 1 | 1 |
| - | chrXIV  | 237531 | 237419 | 0,0,9                      | TTTACTGACCTA  | 0 | 0 |
| - | chrXIV  | 380781 | 380701 | 11                         | ATTACTAATCTG  | 1 | 0 |
| + | chrXIV  | 502164 | 502269 | 0,0,10                     | GATACTGACTAT  | 0 | 0 |
| + | chrXIV  | 616067 | 616229 | 4,0,4                      | TCAACTTACTGT  | 0 | 0 |
| - | chrXV   | 552874 | 552738 | 27,23,51                   | ATTACTAACTGG  | 1 | 1 |
| + | chrXV   | 780121 | 780265 | 604,27,100                 | TTGACTAACACA  | 1 | 1 |
| - | chrXVI  | 76223  | 76014  | 6                          | GTTACTAACATA  | 1 | 1 |
| - | chrXVI  | 281503 | 281386 | 18                         | TTGACTAACACA  | 1 | 1 |
| - | chrXVI  | 582701 | 582570 | 76,0,0,0,0,0,0,0,0,0,10,59 | TATACTAACAAA  | 1 | 1 |
| + | chrXVI  | 623578 | 623665 | 481,39,30                  | TATACTAACAAAG | 1 | 1 |
| + | chrXVI  | 833694 | 833783 | 18                         | AAAATAACAAT   | 1 | 1 |
| + | chrXVI  | 943051 | 943174 | 6,0,1,0,5                  | CTTACTAACTGA  | 1 | 1 |

**Table S6. Novel splice junctions with entropy  $\geq$  2bits.**

Junction field is the chromosome, first splice site coordinate, second splice site coordinate, and strand joined by colons. The first splice site is always the one more 5' on the chromosome (lower number), so if the strand is "+" the first SS is the 5'SS and if the strand is "-" the first SS is the 3'SS. a\_ss1 and a\_ss2 are 0 for unannotated splice sites and 1 for annotated splice sites. a\_ss\_pair is 1 if this pair of splice sites is annotated as a splice junction in the existing SGD gff annotations. K\_SS\_1, K\_SS\_2 and K\_SS\_pair are set to: 0 if not annotated and not found by Kawashima et al., 1 if annotated by Kawashima et al., 2 if not annotated but occurring in a Kawashima et al. junction from WT or UPF1 null, and 3 if not annotated, but occurring in a Kawashima et al. junction not from WT or UPF1 null. intron\_containing\_gene is set to 0 if not from an intron containing gene and 1 if it is.

| junction       | a_SS1 | a_SS2 | a_SS_pair | strand | entropy | 5ss_long   | 3ss_long   | k_SS1 | k_SS2 | k_SS_pair | intron_containing_gene | lib_discovered |
|----------------|-------|-------|-----------|--------|---------|------------|------------|-------|-------|-----------|------------------------|----------------|
| chrXVI:717048: | 0     | 0     | 0         | -      | 2.61    | GTATGCTTT  | CGCTATAAAG | 0     | 0     | 0         | 0                      | polyA          |
| chrVII:72983:  | 0     | 1     | 0         | -      | 4.21    | GTACGTTGC  | CTTAAGAAAG | 2     | 1     | 2         | 1                      | polyA          |
| chrXIV:49432:  | 0     | 1     | 0         | -      | 3.24    | GTACGTAAA  | CTCCATCTAG | 3     | 1     | 3         | 1                      | polyA          |
| chrIV:140179:  | 0     | 1     | 0         | +      | 3.66    | GTTGGTACG  | ATTATCGTAG | 2     | 1     | 2         | 1                      | polyA          |
| chrXVI:40664:  | 1     | 0     | 0         | +      | 3.54    | GTATGTCCA  | AATTTAAAAG | 1     | 2     | 0         | 1                      | polyA          |
| chrXI:618373:  | 1     | 0     | 0         | -      | 4.19    | GTTTGTTCG  | TTTTGTACAG | 1     | 2     | 0         | 1                      | polyA          |
| chrV:131775:   | 1     | 0     | 0         | +      | 3.50    | GTATGTTTG  | AACTTCAAAG | 1     | 2     | 0         | 1                      | polyA          |
| chrXIV:443658: | 0     | 1     | 0         | -      | 2.32    | GTATGTTAA  | AACCACTAG  | 0     | 1     | 0         | 1                      | polyA          |
| chrIV:601387:  | 0     | 0     | 0         | +      | 3.73    | ATTGACTATC | AACCAACCAC | 0     | 0     | 0         | 0                      | polyA          |
| chrII:110218:  | 0     | 1     | 0         | -      | 2.86    | GTAAGTATC  | ATTGAGGAAG | 3     | 1     | 3         | 1                      | polyA          |
| chrXIV:557609: | 1     | 0     | 0         | +      | 2.16    | GTATGTATT  | ATTTGCCCAG | 1     | 2     | 0         | 1                      | polyA          |
| chrII:426515:  | 2     | 0     | 0         | -      | 3.88    | GTAAGTCAG  | ATTAAGTTAG | 1     | 2     | 0         | 1                      | polyA          |
| chrXII:242320: | 1     | 0     | 0         | +      | 2.00    | GTATGTACA  | GTCCACCAAG | 1     | 2     | 0         | 1                      | polyA          |
| chrII:393179:  | 1     | 0     | 0         | +      | 4.78    | GTATGTACA  | TTTATCTAAG | 1     | 2     | 0         | 1                      | polyA          |
| chrV:423823:   | 0     | 1     | 0         | +      | 2.85    | GTAGAGGCA  | TAATTTTTAG | 0     | 1     | 0         | 0                      | polyA          |
| chrX:608481:   | 0     | 1     | 0         | +      | 2.72    | GTAGGTCCA  | TTTTTTGCAG | 0     | 1     | 0         | 1                      | polyA          |
| chrXIV:33145:  | 0     | 1     | 0         | +      | 3.38    | GTATAATCT  | TTCTATTAG  | 2     | 1     | 2         | 1                      | polyA          |
| chrXVI:13872:  | 1     | 0     | 0         | +      | 4.10    | GTATGTTAT  | GTACAGTCAG | 1     | 3     | 0         | 1                      | polyA          |
| chrVII:436311: | 0     | 0     | 0         | +      | 3.90    | GTATGTATT  | ATCTTTACAG | 0     | 0     | 0         | 1                      | polyA          |
| chrXVI:41231:  | 0     | 0     | 0         | +      | 3.23    | GTATGGAGT  | ATTGGAACAG | 2     | 2     | 2         | 1                      | polyA          |
| chrIV:308521:  | 0     | 1     | 0         | +      | 2.48    | GCATGCATA  | ATTATATCAG | 0     | 1     | 0         | 1                      | polyA          |
| chrIII:107032: | 1     | 0     | 0         | +      | 2.25    | GTATGTGTC  | AGAAGTACAG | 1     | 0     | 0         | 1                      | polyA          |
| chrII:60188:   | 0     | 1     | 0         | -      | 2.12    | GTATGTTAA  | AACTAGTTAG | 2     | 1     | 2         | 1                      | polyA          |
| chrXVI:41225:  | 0     | 0     | 0         | +      | 2.95    | GTATGGTAT  | ATTGGAACAG | 2     | 2     | 2         | 1                      | polyA          |
| chrXIII:23359: | 1     | 0     | 0         | -      | 3.03    | GTATGCGTT  | TTTACAACAG | 1     | 2     | 0         | 1                      | polyA          |
| chrXII:28461:  | 0     | 0     | 0         | -      | 2.25    | GTATGACAC  | GGATATTAAG | 0     | 0     | 0         | 0                      | polyA          |
| chrIV:1359968: | 1     | 0     | 0         | +      | 4.10    | GTATGTTTAT | TATCAATAAG | 1     | 2     | 0         | 1                      | polyA          |
| chrXIII:55195: | 1     | 0     | 0         | +      | 4.13    | GTATGTTTC  | TTTTGGTAAG | 1     | 2     | 0         | 1                      | polyA          |
| chrXIV:185490: | 1     | 0     | 0         | +      | 3.78    | GTATGTAGG  | ATGCACCTAG | 1     | 2     | 0         | 1                      | polyA          |
| chrII:168647:  | 0     | 1     | 0         | +      | 2.59    | GTACGTGTC  | TTTTTCACAG | 0     | 1     | 0         | 1                      | polyA          |
| chrXIII:91440: | 0     | 0     | 0         | -      | 2.16    | GTAAGTAAG  | ATGTGGTCAG | 0     | 0     | 0         | 0                      | polyA          |
| chrXIII:42499: | 1     | 0     | 0         | +      | 4.52    | GTATGTTGT  | CAAACACAAG | 1     | 2     | 0         | 1                      | polyA          |
| chrIV:216156:  | 1     | 0     | 0         | +      | 2.92    | GTATGTAAC  | AGGAATTAAG | 1     | 0     | 0         | 0                      | polyA          |
| chrVII:311227: | 0     | 1     | 0         | +      | 3.45    | GTAAGTATC  | TTTTGTACAG | 3     | 1     | 3         | 1                      | polyA          |
| chrXVI:27130:  | 0     | 0     | 0         | +      | 2.42    | GTAAGTATG  | GTTCATCAAG | 0     | 0     | 0         | 0                      | polyA          |
| chrVII:365508: | 0     | 1     | 0         | -      | 3.19    | GTATGTATA  | TTGACCCAG  | 3     | 1     | 3         | 1                      | polyA          |
| chrXI:551679:  | 1     | 0     | 0         | +      | 3.03    | GTATGTTCC  | CTACCAACAG | 1     | 2     | 0         | 1                      | polyA          |
| chrXII:242320: | 1     | 0     | 0         | +      | 2.48    | GTATGTACA  | TGGTCGACAG | 1     | 3     | 0         | 1                      | polyA          |
| chrVII:555829: | 1     | 0     | 0         | +      | 2.99    | GTATGTTTG  | CCGGCTTTAG | 1     | 2     | 0         | 1                      | polyA          |
| chrVII:497364: | 1     | 1     | 0         | -      | 2.32    | GTAAGTACA  | TATAAAATAG | 1     | 1     | 0         | 1                      | polyA          |
| chrXI:155270:  | 1     | 0     | 0         | +      | 4.46    | GTATGTTTAC | AAGTACGAAG | 1     | 2     | 0         | 1                      | polyA          |
| chrVIII:49870: | 0     | 1     | 0         | -      | 3.90    | GTATGTCAC  | GAAACAACAG | 2     | 1     | 2         | 1                      | polyA          |
| chrVII:253184: | 0     | 0     | 0         | -      | 4.80    | GTATGAACC  | CTTATTTTAG | 0     | 0     | 0         | 0                      | polyA          |
| chrIV:417220:  | 0     | 0     | 0         | -      | 3.29    | GTATGTATT  | ATTGTTATAG | 0     | 0     | 0         | 0                      | polyA          |
| chrIV:629904:  | 1     | 0     | 0         | +      | 2.66    | GTATGTTCA  | TTTTGTCCAG | 1     | 3     | 0         | 1                      | polyA          |
| chrIV:601314:  | 0     | 0     | 0         | +      | 3.43    | ATACTACTTA | CACTGAGTAC | 0     | 0     | 0         | 0                      | polyA          |
| chrII:691965:  | 0     | 0     | 0         | +      | 2.46    | GTATGGAAA  | AGTTTAGAAG | 0     | 0     | 0         | 0                      | polyA          |
| chrXII:233641: | 0     | 0     | 0         | -      | 3.45    | GTATGTCTT  | ACCGCCCCAG | 0     | 0     | 0         | 0                      | polyA          |
| chrXI:437836:  | 1     | 0     | 0         | +      | 2.90    | GTATGTTGT  | CTTTAGAAAG | 1     | 2     | 0         | 1                      | polyA          |
| chrXII:766185: | 0     | 1     | 0         | -      | 3.20    | GTATGTATC  | CATATATAAG | 3     | 1     | 3         | 1                      | polyA          |
| chrXIV:55757:  | 0     | 1     | 0         | +      | 2.75    | GTACGTAAA  | AACAATGCAG | 2     | 1     | 2         | 1                      | polyA          |
| chrVII:534472: | 1     | 0     | 0         | -      | 2.94    | GTATCTATA  | TTATCATAG  | 1     | 2     | 0         | 0                      | polyA          |



|                |   |   |   |   |      |           |              |   |   |   |   |       |
|----------------|---|---|---|---|------|-----------|--------------|---|---|---|---|-------|
| chrXII:242320  | 1 | 0 | 0 | + | 2.29 | GTATGTACA | TCTCTCCAG    | 1 | 2 | 0 | 1 | polyA |
| chrII:393179:  | 1 | 0 | 0 | + | 2.52 | GTATGTACA | AGTATCCAAG   | 1 | 0 | 0 | 1 | polyA |
| chrII:691965:  | 0 | 0 | 0 | + | 3.87 | GTATGGAAA | AGGTAAGCAG   | 0 | 0 | 0 | 0 | polyA |
| chrX:74112:74  | 0 | 1 | 0 | + | 4.44 | GTTGTTAGA | TCATGTATAG   | 2 | 1 | 2 | 1 | polyA |
| chrII:653367:  | 1 | 0 | 0 | + | 3.61 | GTATGTTCT | ACGCAAACAG   | 1 | 3 | 0 | 1 | polyA |
| chrIV:399360:  | 1 | 0 | 0 | + | 2.67 | GTATGTTGT | CCTTGATCAG   | 1 | 2 | 0 | 1 | polyA |
| chrI:128520:1  | 0 | 0 | 0 | - | 3.96 | GTATGGATG | GCAACAGCAG   | 0 | 0 | 0 | 0 | polyA |
| chrXIV:616065  | 0 | 0 | 0 | + | 2.97 | GTATGTGCA | ACTATCAAAG   | 0 | 0 | 0 | 0 | polyA |
| chrIV:733684:  | 0 | 1 | 0 | - | 2.97 | GTATGTTCA | AAATTAACAG   | 3 | 1 | 3 | 1 | polyA |
| chrXII:281426  | 0 | 0 | 0 | - | 2.83 | GTAGGTCAT | AACTATCTAG   | 0 | 0 | 0 | 0 | polyA |
| chrII:142752:  | 0 | 1 | 0 | - | 4.03 | GTATGTTAC | GACCATCAAG   | 2 | 1 | 2 | 1 | polyA |
| chrXIV:185490  | 1 | 0 | 0 | + | 3.96 | GTATGTAGG | AGTGCGGTAG   | 1 | 2 | 0 | 1 | polyA |
| chrIV:306804:  | 0 | 0 | 0 | - | 3.46 | GTACGTTGA | GTTAATTAG    | 0 | 0 | 0 | 1 | polyA |
| chrI:128523:1  | 0 | 0 | 0 | - | 3.11 | GTATGGATG | CCAGCAACAG   | 0 | 0 | 0 | 0 | polyA |
| chrXIII:55782  | 0 | 0 | 0 | - | 2.64 | GTAAGATCA | AGTTCCTAAG   | 0 | 0 | 0 | 0 | polyA |
| chrXVI:729352  | 0 | 1 | 0 | - | 2.72 | GTATGTACA | TCTCTAGTAG   | 2 | 1 | 2 | 1 | polyA |
| chrVII:62130:  | 1 | 0 | 0 | + | 3.86 | GTATGTCTG | TAGTTTAAAG   | 1 | 2 | 0 | 1 | polyA |
| chrIV:307015:  | 0 | 1 | 0 | - | 2.62 | GTATGTTAA | CTTACGACAG   | 0 | 1 | 0 | 1 | polyA |
| chrIV:1406991  | 0 | 0 | 0 | + | 2.16 | GTATGTTAC | ACTCACTTAG   | 0 | 0 | 0 | 0 | polyA |
| chrX:649513:6  | 0 | 0 | 0 | - | 2.24 | GTAAGTTAT | ATACAAAAG    | 0 | 0 | 0 | 0 | polyA |
| chrXII:982457  | 0 | 0 | 0 | - | 2.78 | GTATGTATG | GTTTGAGTAG   | 0 | 0 | 0 | 0 | polyA |
| chrXVI:673747  | 0 | 0 | 0 | + | 2.50 | GTATGTCTG | TGAACAAAAG   | 0 | 0 | 0 | 0 | polyA |
| chrXII:856568  | 0 | 1 | 0 | + | 3.18 | GCATGGTAT | CCTTATTAG    | 2 | 1 | 2 | 1 | polyA |
| chrXV:867396   | 0 | 1 | 0 | + | 3.88 | GTATGAAAT | TTTTATACAG   | 2 | 1 | 2 | 1 | polyA |
| chrVI:223439:  | 1 | 0 | 0 | - | 3.05 | GCAGGTAGC | TCTCTCCAG    | 1 | 3 | 0 | 0 | polyA |
| chrVI:64352:6  | 0 | 1 | 0 | - | 3.28 | GTACGTTAA | TTTGAAGAAG   | 2 | 1 | 2 | 1 | polyA |
| chrII:604513:  | 1 | 0 | 0 | + | 2.55 | GTACGTATT | TTTTAGGAG    | 1 | 0 | 0 | 1 | polyA |
| chrVII:439096  | 0 | 1 | 0 | + | 4.16 | GTATAACAT | ATTCAACAG    | 2 | 1 | 2 | 1 | polyA |
| chrVII:439098  | 0 | 0 | 0 | + | 3.80 | ATAACATGA | TATCGTTTAC   | 2 | 2 | 2 | 1 | polyA |
| chrXIV:62360:  | 0 | 1 | 0 | - | 3.59 | GTACGTATA | GACGTTGCAG   | 2 | 1 | 2 | 1 | polyA |
| chrXV:505936   | 1 | 0 | 0 | + | 3.34 | GTATGTTAT | AGGAAAAAAG   | 1 | 2 | 0 | 1 | polyA |
| chrII:170619:  | 0 | 1 | 0 | + | 4.07 | GTATGCTTT | TTCCACTCAG   | 0 | 1 | 0 | 1 | polyA |
| chrVII:50524:  | 0 | 1 | 0 | - | 3.08 | GTATGTTAG | ATATAGAAAG   | 2 | 1 | 2 | 1 | polyA |
| chrII:342697:  | 0 | 0 | 0 | + | 3.63 | GTGTGTTAG | TATAATCAAG   | 0 | 0 | 0 | 0 | polyA |
| chrXIV:272386  | 0 | 0 | 0 | - | 2.28 | GTTTGTGTA | ATTTCGCAG    | 0 | 0 | 0 | 0 | polyA |
| chrII:170675:  | 1 | 0 | 0 | + | 3.87 | GTATGTTCA | TTGAAAAAAG   | 1 | 2 | 0 | 1 | polyA |
| chrXIV:72855:  | 0 | 0 | 0 | + | 3.35 | GTAAGTATT | GCCAGCACAG   | 0 | 0 | 0 | 0 | polyA |
| chrXIII:55978  | 0 | 0 | 0 | + | 5.14 | GTATGTTCT | ATTTTTGAAG   | 0 | 0 | 0 | 0 | polyA |
| chrII:565749:  | 0 | 0 | 0 | + | 2.25 | ATGGATTTT | CTGTACGGAC   | 0 | 0 | 0 | 0 | polyA |
| chrXII:898547  | 0 | 1 | 0 | + | 3.51 | GTATAAAAA | ATTATTGCAG   | 2 | 1 | 2 | 0 | polyA |
| chrVII:439380  | 0 | 0 | 0 | + | 4.35 | GTAAGTACA | TTTGAGAAAG   | 2 | 2 | 2 | 1 | polyA |
| chrXII:457115  | 0 | 0 | 0 | - | 2.92 | GTTAAAAAG | GTTGTTGCAG   | 0 | 0 | 0 | 0 | polyA |
| chrIV:340809:  | 1 | 0 | 0 | - | 3.82 | GTATGCATA | TTGGTTATAG   | 1 | 0 | 0 | 0 | polyA |
| chrII:60207:6  | 0 | 1 | 0 | - | 2.65 | GTATGTTAA | CGATATTGAG   | 3 | 1 | 3 | 1 | polyA |
| chrXI:109576:  | 1 | 0 | 0 | + | 2.82 | GTATGTCAA | CAGGCTAAAG   | 1 | 2 | 0 | 1 | polyA |
| chrXV:423656   | 0 | 0 | 0 | - | 2.85 | GTATGGTAC | TGTCGTACAG   | 0 | 0 | 0 | 0 | polyA |
| chrIX:317016:  | 0 | 1 | 0 | + | 4.39 | GTATGAGAA | ATTTAAACAG   | 2 | 1 | 2 | 1 | polyA |
| chrV:362911:3  | 0 | 1 | 0 | + | 2.37 | GTAAGTAA  | ATTTAAATAG   | 3 | 1 | 3 | 0 | polyA |
| chrXIII:55195  | 1 | 0 | 0 | + | 2.16 | GTATGTTTT | TGGTAAGAAG   | 1 | 0 | 0 | 1 | polyA |
| chrIII:101604: | 0 | 1 | 0 | - | 2.59 | GTATGTATA | TGCGTTCAAG   | 3 | 1 | 3 | 1 | polyA |
| chrII:168553:  | 0 | 1 | 0 | + | 3.45 | GTTGGTAGC | TTTTTCACAG   | 3 | 1 | 3 | 1 | polyA |
| chrXI:93365:9  | 0 | 1 | 0 | - | 5.06 | GTACGTATA | GTTTTTATAG   | 2 | 1 | 2 | 0 | polyA |
| chrIV:216156:  | 1 | 0 | 0 | + | 3.08 | GTATGTAAC | GATTTTCATAG  | 1 | 0 | 0 | 0 | polyA |
| chrXII:855876  | 1 | 0 | 0 | + | 4.37 | GTATGTGGA | CAAAACATAG   | 1 | 0 | 0 | 0 | polyA |
| chrXI:437836:  | 1 | 0 | 0 | + | 2.99 | GTATGTTGT | AGAATCAAAG   | 1 | 2 | 0 | 1 | polyA |
| chrXVI:795028  | 1 | 0 | 0 | + | 2.66 | GTATGTACA | TTGTCAAAG    | 1 | 2 | 0 | 1 | polyA |
| chrXIV:494523  | 1 | 0 | 0 | - | 2.12 | GTAATGGTA | TTTATTATAG   | 1 | 0 | 0 | 1 | polyA |
| chrIV:491687:  | 0 | 1 | 0 | + | 4.33 | GCATGTTTA | CTTTTTTATAG  | 2 | 1 | 2 | 1 | polyA |
| chrXV:778858   | 1 | 0 | 0 | - | 4.31 | GTATGAATA | ATTTTGATAG   | 1 | 3 | 0 | 1 | polyA |
| chrX:469182:4  | 1 | 0 | 0 | - | 3.10 | GCAGGTAAA | TGTAGTATAG   | 1 | 2 | 2 | 1 | polyA |
| chrVIII:14811  | 1 | 0 | 0 | - | 4.02 | GTATGCGTT | TTTATTACAG   | 1 | 2 | 0 | 1 | polyA |
| chrVIII:10361  | 0 | 0 | 0 | - | 3.11 | GTAAGGTGA | GTAACCTTGAG  | 0 | 0 | 0 | 0 | polyA |
| chrVII:383484  | 0 | 0 | 0 | + | 3.31 | GTATGTATG | ATGGTAGTAG   | 0 | 0 | 0 | 0 | polyA |
| chrXVI:795133  | 0 | 1 | 0 | + | 3.90 | GTAAGGGAC | TTTTAAACAG   | 2 | 1 | 2 | 1 | polyA |
| chrXV:349496   | 0 | 0 | 0 | - | 2.73 | GTATGTTTT | TTACTTTTATAG | 0 | 0 | 0 | 0 | polyA |

|               |   |   |   |   |        |            |             |   |   |   |   |          |
|---------------|---|---|---|---|--------|------------|-------------|---|---|---|---|----------|
| chrXIV:144846 | 0 | 1 | 0 | - | 3.20   | GTATGTTTAT | AAGCTATCAG  | 2 | 1 | 2 | 1 | polyA    |
| chrXII:242320 | 1 | 0 | 0 | + | 3.33   | GTATGTACAA | TGGCTGCTAG  | 1 | 0 | 0 | 1 | polyA    |
| chrXI:625900  | 1 | 0 | 0 | + | 3.18   | GTAAGTAGA  | AGAACTAAAG  | 1 | 2 | 0 | 1 | polyA    |
| chrVII:62130  | 1 | 0 | 0 | + | 3.91   | GTATGTCTG  | CGATCAAAG   | 1 | 2 | 0 | 1 | polyA    |
| chrVII:920663 | 1 | 0 | 0 | + | 2.65   | GTATGTTATA | GTTCCACCAAG | 1 | 2 | 0 | 1 | polyA    |
| chrXII:522889 | 0 | 1 | 0 | + | 3.42   | GTATGCCTG  | TTTTAAATAG  | 3 | 1 | 3 | 1 | polyA    |
| chrVII:365525 | 1 | 0 | 0 | - | 2.82   | GTCTATTTTA | ATTATTACAG  | 1 | 2 | 0 | 1 | polyA    |
| chrXIV:62369  | 0 | 1 | 0 | - | 2.50   | GTACGTATA  | TCAATTAGAG  | 0 | 1 | 0 | 1 | polyA    |
| chrIV:122076  | 1 | 0 | 0 | + | 2.11   | GTATGTTGA  | AACAATAAG   | 1 | 0 | 0 | 0 | polyA    |
| chrIV:306804  | 0 | 1 | 0 | - | 3.76   | GTATGTTTAA | GTTAATTAG   | 0 | 1 | 0 | 1 | polyA    |
| chrXVI:303560 | 0 | 0 | 0 | + | 2.00   | ATTGGTTTGC | TGCTTCTGAC  | 0 | 0 | 0 | 0 | polyA    |
| chrXV:505936  | 1 | 0 | 0 | + | 2.34   | GTATGTTATT | CATTTACAAG  | 1 | 0 | 0 | 1 | polyA    |
| chrIV:655202  | 0 | 0 | 0 | + | 3.06   | GTATGCCTC  | TGATAATCAG  | 0 | 0 | 0 | 0 | polyA    |
| chrXII:987140 | 1 | 0 | 0 | + | 3.45   | GTATGTAAA  | AATGGCATAG  | 1 | 2 | 0 | 1 | polyA    |
| chrIV:122076  | 1 | 0 | 0 | + | 2.00   | GTATGTTGA  | AGTATATAAG  | 1 | 0 | 0 | 0 | polyA    |
| chrXVI:243488 | 0 | 0 | 0 | - | 3.55   | GTATGTTTCT | TACTTAGAAG  | 0 | 0 | 0 | 0 | polyA    |
| chrII:168599  | 0 | 1 | 0 | + | 2.69   | GTACGAATT  | TTTTTCACAG  | 0 | 1 | 0 | 1 | polyA    |
| chrXV:373898  | 0 | 0 | 0 | + | 2.48   | GTAAGCATT  | ATCCTATAAG  | 0 | 0 | 0 | 0 | polyA    |
| chrXIII:66692 | 0 | 1 | 0 | - | 2.04   | GTATGTGTG  | AGGCTAACAG  | 2 | 1 | 2 | 1 | polyA    |
| chrXII:453363 | 0 | 0 | 0 | - | 2      | GTTTTCATGC | GAAGGAATAG  | 0 | 0 | 0 | 0 | riboZero |
| chrX:50320:50 | 0 | 1 | 0 | - | 3.835  | GTATGTTCA  | TGTTTCGAAG  | 2 | 1 | 2 | 1 | riboZero |
| chrXII:593144 | 0 | 0 | 0 | + | 2.1175 | GTTGGAATA  | CTCAGAATAG  | 0 | 0 | 0 | 0 | riboZero |
| chrXI:447150  | 0 | 0 | 0 | - | 2.5216 | GTATGCCAG  | ATAAATAAG   | 0 | 3 | 0 | 1 | riboZero |
| chrXIV:282743 | 0 | 0 | 0 | - | 4.0427 | GTCITGTTG  | GGATTGGAG   | 0 | 0 | 0 | 0 | riboZero |
| chrXII:453697 | 0 | 0 | 0 | - | 2.2516 | GTGGGGAAA  | AAGACTGAAG  | 0 | 0 | 0 | 0 | riboZero |
| chrIV:122076  | 1 | 0 | 0 | + | 2.4056 | GTATGTTGA  | AAGGAGTTAG  | 1 | 0 | 0 | 0 | riboZero |
| chrII:592415  | 1 | 0 | 0 | - | 2.4508 | GTATACCCA  | TTTATAACAG  | 1 | 0 | 0 | 1 | riboZero |
| chrVII:937211 | 0 | 0 | 0 | + | 3.1069 | GTAAGATTT  | TGTGATAAAG  | 0 | 0 | 0 | 0 | riboZero |
| chrXV:29674   | 0 | 0 | 0 | + | 2.512  | GTGGAACCC  | AGAAAAGAGAG | 0 | 0 | 0 | 0 | riboZero |
| chrIV:1329745 | 0 | 0 | 0 | + | 2.4508 | GTGGTTACG  | GGCTCCAGAG  | 0 | 0 | 0 | 0 | riboZero |
| chrXV:296674  | 0 | 0 | 0 | + | 2.3219 | GTAAGTATC  | CAAAAATTAG  | 0 | 0 | 0 | 0 | riboZero |
| chrX:50318:50 | 0 | 1 | 0 | - | 3.4399 | GTATGTTCA  | TTTCGAAGAG  | 0 | 1 | 2 | 1 | riboZero |
| chrX:400191:4 | 0 | 0 | 0 | + | 3.9917 | GTGCTGAAG  | AGTGCTGGAG  | 0 | 0 | 0 | 0 | riboZero |
| chrI:128513:1 | 0 | 0 | 0 | - | 2      | GTATGGATG  | CAGTGTGTTAG | 0 | 0 | 0 | 0 | riboZero |
| chrVII:62130  | 1 | 0 | 0 | + | 2.6464 | GTATGTCTG  | GGATTCTTAG  | 1 | 0 | 0 | 1 | riboZero |
| chrX:503769:5 | 0 | 0 | 0 | + | 4.1314 | GTAAGTTGA  | AACATTATAG  | 0 | 0 | 0 | 0 | riboZero |
| chrXV:31111   | 0 | 0 | 0 | + | 3.1219 | GTTGAACCC  | AGTGGCGGAG  | 0 | 0 | 0 | 0 | riboZero |
| chrXI:220776  | 0 | 0 | 0 | + | 4.3865 | GTGCTGGAG  | ATGATGGGAG  | 0 | 0 | 0 | 0 | riboZero |
| chrIV:1329765 | 0 | 0 | 0 | + | 3.6645 | GTGGCTACG  | TATCCAGAG   | 0 | 0 | 0 | 0 | riboZero |
| chrXII:789112 | 0 | 0 | 0 | - | 4.1486 | GTTTGTGG   | TCCTCCACAG  | 0 | 0 | 0 | 0 | riboZero |
| chrXIII:61080 | 0 | 0 | 0 | + | 4.1788 | GTATGTAAA  | GATGAATAAG  | 0 | 0 | 0 | 0 | riboZero |
| chrIV:122076  | 1 | 0 | 0 | + | 3.2729 | GTATGTTGA  | TCTCTCAAG   | 1 | 0 | 0 | 0 | riboZero |
| chrXII:458101 | 0 | 0 | 0 | + | 3.7363 | GTTTGAATC  | TTCCCAAG    | 0 | 0 | 0 | 0 | riboZero |
| chrX:400245:4 | 0 | 0 | 0 | + | 2.6358 | GTGCTGGAG  | GGTACTGGAG  | 0 | 0 | 0 | 0 | riboZero |
| chrI:12486:12 | 0 | 0 | 0 | + | 4.1491 | GTGGTAATG  | CTGGTAACAG  | 0 | 0 | 0 | 0 | riboZero |
| chrXVI:656504 | 0 | 0 | 0 | - | 2.25   | GTAGTTGAG  | CGGAGGACAG  | 0 | 0 | 0 | 0 | riboZero |
| chrXII:564435 | 0 | 1 | 0 | - | 3.7185 | GTAAGTTTT  | TATTATTGAG  | 0 | 1 | 0 | 1 | riboZero |
| chrXVI:29539  | 0 | 0 | 0 | + | 2      | GTATGAAAT  | ATTATCCAG   | 0 | 0 | 0 | 0 | riboZero |
| chrXI:155412  | 0 | 1 | 0 | + | 4.3201 | GTGAGTTCT  | AAATGACCAG  | 0 | 1 | 0 | 1 | riboZero |
| chrXII:452056 | 0 | 0 | 0 | - | 2.2516 | GTCAGAATC  | CGCCTCTAAG  | 0 | 0 | 0 | 0 | riboZero |
| chrIV:601072  | 0 | 0 | 0 | - | 3.1972 | GTACCGTTA  | TTCAGTAGAG  | 0 | 0 | 0 | 0 | riboZero |
| chrXII:789133 | 0 | 0 | 0 | - | 4.0525 | GTTTGTGG   | TCCTTCACAG  | 0 | 0 | 0 | 0 | riboZero |
| chrXI:155412  | 0 | 0 | 0 | + | 4.5864 | GTGAGTTCT  | AAGTACGAAG  | 0 | 2 | 0 | 1 | riboZero |
| chrIX:23755:2 | 0 | 0 | 0 | - | 2.666  | GTTCCAAAG  | ACCTCTGAAG  | 0 | 0 | 0 | 0 | riboZero |
| chrIV:169349  | 0 | 0 | 0 | + | 3.0221 | GTAAGTTGA  | GCTTCTTTAG  | 0 | 0 | 0 | 0 | riboZero |
| chrXIV:282623 | 0 | 0 | 0 | - | 2.7255 | GTCTTGGAT  | AGACTTGGAG  | 0 | 0 | 0 | 0 | riboZero |
| chrVII:946323 | 0 | 1 | 0 | + | 3.182  | GTGGTACGT  | TTTCTACAG   | 0 | 1 | 0 | 1 | riboZero |
| chrV:369419:3 | 0 | 0 | 0 | - | 2      | GTATTTTTT  | TTAATAAAAG  | 0 | 0 | 0 | 0 | riboZero |
| chrXVI:58255  | 1 | 0 | 0 | - | 2.2359 | GTATGTGAT  | AAAAACTAG   | 1 | 0 | 0 | 1 | riboZero |
| chrX:570566:5 | 0 | 0 | 0 | - | 2      | GTAGTCCCT  | CATTTCCAAG  | 0 | 0 | 0 | 0 | riboZero |
| chrIV:427465  | 0 | 0 | 0 | + | 2      | GTGGCTTCG  | GGCTCCAGAG  | 0 | 0 | 0 | 0 | riboZero |
| chrXIV:282623 | 0 | 0 | 0 | - | 3.8299 | GTCTTGTGG  | AGACTTGGAG  | 0 | 0 | 0 | 0 | riboZero |
| chrXIV:427102 | 0 | 0 | 0 | + | 2.6887 | GTATGACAC  | ACTGTCTCAG  | 0 | 0 | 0 | 0 | riboZero |
| chrIV:601362  | 0 | 0 | 0 | - | 2.585  | GTCTTACCG  | ACGGTGTAAAG | 0 | 0 | 0 | 0 | riboZero |
| chrX:637808:6 | 1 | 0 | 0 | + | 3.027  | GTATGTATAT | TATGCGCAAG  | 1 | 0 | 0 | 1 | riboZero |



**Table S7 : Figure 6A PSI values**

| exp1          | exp3 | alpha1 | alpha2 | sorbitol1 | sorbitol2 |      |
|---------------|------|--------|--------|-----------|-----------|------|
| chrI:142053:1 |      | 0.04   | 0.03   | 0.01      | 0.03      | 0.02 |
| chrI:87187:87 |      | 0.14   | 0.05   | 0.03      | 0.06      | 0.08 |
| chrII:124954: |      | 0.31   | 0.25   | -1        | 0.42      | 0.35 |
| chrII:186428: |      | 0.47   | 0.39   | -1        | -1        | -1   |
| chrII:332675: |      | 0.14   | 0.21   | 0.14      | 0.11      | 0.2  |
| chrII:342498: |      | -1     | -1     | 0.85      | -1        | -1   |
| chrII:407123: |      | 0.14   | 0.11   | 0.09      | 0.13      | 0.15 |
| chrII:415260: |      | 0.06   | 0.07   | 0.03      | 0.04      | 0.06 |
| chrII:45444:4 |      | 0.06   | 0.09   | 0.05      | 0.05      | 0.07 |
| chrII:462009: |      | 0.95   | 0.95   | 0.95      | 0.95      | 0.97 |
| chrII:462229: |      | -1     | -1     | -1        | -1        | -1   |
| chrII:47147:4 |      | 0.93   | 0.91   | -1        | 0.78      | 0.57 |
| chrII:479145: |      | -1     | -1     | -1        | -1        | -1   |
| chrII:592769: |      | 0.03   | 0.04   | 0.02      | 0.02      | 0.04 |
| chrII:606080: |      | 0.04   | 0.05   | 0.02      | 0.03      | 0.05 |
| chrII:680040: |      | 0.1    | 0.11   | 0.14      | 0.08      | 0.13 |
| chrII:89441:8 |      | 0.01   | 0.02   | 0.01      | 0.01      | 0.02 |
| chrIII:111634 |      | 0.96   | 0.94   | 0.96      | 0.92      | 0.97 |
| chrIII:178214 |      | 0.01   | 0.01   | 0         | 0.01      | 0.01 |
| chrIV:1103609 |      | -1     | -1     | -1        | -1        | -1   |
| chrIV:117466: |      | 0.01   | 0.01   | 0         | 0.01      | 0.01 |
| chrIV:1212677 |      | -1     | -1     | -1        | -1        | -1   |
| chrIV:1236642 |      | 0.16   | 0.17   | 0.15      | 0.18      | 0.2  |
| chrIV:1266862 |      | 0.79   | 0.92   | 0.75      | 0.48      | 0.79 |
| chrIV:1319698 |      | 0.08   | 0.07   | -1        | -1        | -1   |
| chrIV:1319817 |      | -1     | -1     | -1        | -1        | -1   |
| chrIV:1355551 |      | 0.06   | 0.11   | 0.04      | 0.03      | 0.09 |
| chrIV:1406792 |      | 0.92   | 0.95   | 0.86      | 0.87      | 0.91 |
| chrIV:1450847 |      | 0.05   | 0.07   | 0.04      | 0.04      | 0.08 |
| chrIV:217402: |      | 0.02   | 0.03   | 0.01      | 0.01      | 0.02 |
| chrIV:229819: |      | 0.08   | 0.09   | 0.05      | 0.08      | 0.05 |
| chrIV:255045: |      | 0.93   | 0.95   | 0.92      | 0.91      | 0.93 |
| chrIV:267525: |      | -1     | -1     | -1        | -1        | -1   |
| chrIV:308227: |      | 0.03   | 0.02   | 0.01      | 0.01      | 0.02 |
| chrIV:314337: |      | -1     | -1     | -1        | -1        | -1   |
| chrIV:322082: |      | 0.01   | 0.01   | 0.01      | 0.01      | 0.01 |
| chrIV:337324: |      | -1     | 0.31   | -1        | -1        | -1   |
| chrIV:417627: |      | 0.21   | -1     | -1        | 0.42      | 0.29 |
| chrIV:431473: |      | 0.3    | 0.29   | 0.23      | 0.19      | 0.2  |
| chrIV:458098: |      | 0.93   | 0.94   | 0.93      | -1        | 0.92 |
| chrIV:491359: |      | 0.07   | 0.08   | 0.05      | 0.05      | 0.07 |
| chrIV:569724: |      | -1     | -1     | -1        | -1        | -1   |
| chrIV:579278: |      | 0.42   | 0.52   | 0.24      | 0.26      | 0.56 |
| chrIV:65106:6 |      | -1     | -1     | -1        | -1        | -1   |
| chrIV:655003: |      | 0.97   | 0.99   | 0.99      | 0.99      | 0.99 |
| chrIX:127461: |      | 0.04   | 0.02   | -1        | 0.04      | 0.02 |
| chrIX:166234: |      | -1     | -1     | -1        | -1        | -1   |

|               |      |      |      |      |      |
|---------------|------|------|------|------|------|
| chrIX:232367: | 0.03 | 0.06 | 0.03 | 0.03 | 0.05 |
| chrIX:257027: | 0.03 | 0.03 | 0.02 | 0.02 | 0.03 |
| chrIX:348495: | 0.24 | 0.24 | 0.16 | 0.11 | 0.37 |
| chrIX:47498:4 | 0.28 | 0.17 | -1   | 0.26 | -1   |
| chrIX:68515:6 | 0.02 | 0.02 | 0.01 | 0.01 | 0.02 |
| chrIX:99386:9 | 0.05 | 0.06 | 0.03 | 0.04 | 0.04 |
| chrV:159088:1 | 0.65 | 0.47 | -1   | 0.45 | 0.5  |
| chrV:166875:1 | -1   | -1   | -1   | -1   | -1   |
| chrV:270149:2 | 0.02 | 0.02 | 0.01 | 0.02 | 0.02 |
| chrV:306125:3 | 0.02 | 0.04 | 0.02 | 0.02 | 0.05 |
| chrV:307546:3 | 0.17 | -1   | -1   | -1   | -1   |
| chrV:307756:3 | 0.11 | -1   | -1   | 0.18 | -1   |
| chrV:348277:3 | 0.13 | -1   | -1   | -1   | 0.18 |
| chrV:396610:3 | 0.07 | 0.07 | 0.07 | 0.08 | 0.07 |
| chrV:432471:4 | 0.03 | 0.03 | 0.02 | 0.03 | 0.02 |
| chrVI:203387: | 0.9  | 0.97 | 0.95 | 0.95 | 0.82 |
| chrVI:221415: | 0.39 | 0.33 | 0.27 | 0.48 | 0.23 |
| chrVI:223772: | 0.06 | 0.08 | 0.07 | 0.06 | 0.07 |
| chrVI:241809: | 0.89 | -1   | -1   | -1   | -1   |
| chrVI:63974:6 | -1   | -1   | -1   | -1   | -1   |
| chrVI:64921:6 | 0.71 | 0.72 | 0.59 | 0.62 | 0.61 |
| chrVII:148967 | 0.04 | 0.04 | 0.01 | 0.03 | 0.05 |
| chrVII:150526 | 0.14 | 0.16 | 0.15 | 0.13 | 0.17 |
| chrVII:249686 | -1   | -1   | -1   | -1   | -1   |
| chrVII:253249 | 0.92 | 0.94 | 0.93 | 0.9  | 0.91 |
| chrVII:365433 | 0.03 | 0.04 | 0.03 | 0.03 | 0.03 |
| chrVII:383285 | -1   | 0.88 | -1   | -1   | 0.82 |
| chrVII:436112 | -1   | -1   | -1   | 0.52 | -1   |
| chrVII:438398 | 0.02 | 0.03 | 0.02 | 0.02 | 0.03 |
| chrVII:439181 | 1    | 1    | 1    | 1    | 1    |
| chrVII:543438 | 0.11 | 0.08 | 0.14 | 0.08 | 0.1  |
| chrVII:726838 | 0.04 | 0.05 | 0.03 | 0.02 | 0.04 |
| chrVII:859474 | 0.17 | 0.14 | 0.18 | 0.1  | 0.19 |
| chrVIII:10385 | 0.99 | 0.99 | 0.99 | 0.99 | 0.99 |
| chrVIII:10420 | 0.02 | 0.03 | 0.01 | 0.01 | 0.02 |
| chrVIII:10763 | -1   | -1   | -1   | 0.6  | 0.73 |
| chrVIII:12635 | 0.08 | 0.11 | 0.09 | 0.08 | 0.08 |
| chrVIII:12932 | -1   | -1   | -1   | -1   | -1   |
| chrVIII:13840 | -1   | -1   | -1   | -1   | -1   |
| chrVIII:18767 | 0.03 | 0.02 | -1   | -1   | 0.02 |
| chrVIII:25095 | 0.95 | 0.91 | 0.91 | 0.91 | 0.93 |
| chrVIII:25575 | -1   | -1   | -1   | -1   | -1   |
| chrVIII:29848 | -1   | -1   | -1   | -1   | -1   |
| chrVIII:35466 | -1   | -1   | -1   | -1   | -1   |
| chrVIII:38274 | 0.1  | 0.13 | 0.08 | 0.07 | 0.12 |
| chrX:157250:1 | 0.02 | 0.02 | 0.01 | 0.01 | 0.03 |
| chrX:172753:1 | 0.31 | 0.49 | 0.29 | 0.24 | 0.29 |
| chrX:365584:1 | 0.56 | 0.5  | -1   | -1   | 0.51 |
| chrX:387436:1 | 0.92 | -1   | -1   | -1   | -1   |

|               |      |      |      |      |      |
|---------------|------|------|------|------|------|
| chrX:396571:1 | -1   | -1   | -1   | -1   | -1   |
| chrX:435027:4 | 0.08 | 0.09 | 0.06 | 0.05 | 0.08 |
| chrX:469264:4 | 0.83 | -1   | -1   | -1   | 0.68 |
| chrX:50412:50 | 0.27 | 0.3  | 0.26 | 0.31 | 0.17 |
| chrX:608282:6 | 0.06 | 0.07 | 0.04 | 0.04 | 0.07 |
| chrX:649658:6 | -1   | -1   | -1   | -1   | -1   |
| chrX:703055:7 | 0.05 | 0.09 | 0.07 | 0.04 | 0.1  |
| chrX:75738:7! | 0.01 | 0.01 | 0.01 | 0.01 | 0.01 |
| chrX:90894:9: | 0.02 | 0.02 | 0.01 | 0.01 | 0.03 |
| chrXI:166199: | -1   | -1   | -1   | -1   | 0.37 |
| chrXI:282895: | 0.05 | 0.04 | 0.02 | 0.03 | 0.03 |
| chrXI:430597: | 0.38 | 0.32 | 0.4  | 0.31 | 0.3  |
| chrXI:431834: | 0.02 | 0.03 | 0.01 | 0.01 | 0.03 |
| chrXI:93466:9 | 0.16 | 0.1  | 0.27 | 0.28 | 0.25 |
| chrXII:102866 | 0.06 | 0.07 | 0.04 | 0.04 | 0.07 |
| chrXII:233886 | 1    | 1    | 1    | 1    | 1    |
| chrXII:263005 | 0.15 | 0.14 | 0.14 | 0.14 | 0.16 |
| chrXII:281629 | 0.98 | 0.97 | 0.96 | 0.98 | 0.96 |
| chrXII:286557 | -1   | -1   | -1   | -1   | -1   |
| chrXII:28835: | 0.9  | 0.96 | 0.85 | 0.94 | 0.92 |
| chrXII:40401: | -1   | 0.02 | -1   | 0.01 | 0.02 |
| chrXII:466255 | 0.99 | 0.89 | 1    | 1    | 1    |
| chrXII:564514 | -1   | -1   | -1   | -1   | -1   |
| chrXII:694182 | -1   | -1   | -1   | -1   | -1   |
| chrXII:713156 | 0.04 | 0.04 | 0.03 | 0.02 | 0.04 |
| chrXII:766130 | -1   | -1   | -1   | -1   | -1   |
| chrXII:796336 | 0.05 | 0.08 | 0.04 | 0.03 | 0.06 |
| chrXII:819130 | 0.06 | 0.08 | 0.04 | 0.03 | 0.08 |
| chrXII:856374 | 0.13 | 0.13 | 0.08 | 0.09 | 0.11 |
| chrXII:931699 | 0.02 | 0.03 | 0.01 | 0.01 | 0.03 |
| chrXII:982539 | 0.96 | 0.95 | 0.97 | 0.95 | 0.94 |
| chrXIII:12415 | 0.03 | 0.07 | 0.02 | 0.02 | 0.04 |
| chrXIII:14018 | -1   | -1   | -1   | -1   | -1   |
| chrXIII:16371 | 0.26 | 0.28 | 0.15 | 0.2  | 0.15 |
| chrXIII:20589 | 0.38 | -1   | -1   | -1   | 0.42 |
| chrXIII:22378 | 0.01 | 0.02 | 0.01 | 0.01 | 0.01 |
| chrXIII:22569 | 0    | 0.01 | 0    | 0    | 0.01 |
| chrXIII:23639 | 0.16 | 0.09 | -1   | 0.2  | 0.09 |
| chrXIII:33761 | -1   | -1   | -1   | -1   | -1   |
| chrXIII:50015 | 0.03 | 0.02 | 0.02 | 0.02 | 0.03 |
| chrXIII:55800 | 0.99 | 0.99 | 0.99 | 0.99 | 0.99 |
| chrXIII:55958 | 0.62 | 0.54 | 0.37 | 0.29 | 0.59 |
| chrXIII:65096 | 0.14 | 0.15 | 0.07 | 0.08 | 0.12 |
| chrXIII:65284 | 0.32 | -1   | -1   | -1   | 0.32 |
| chrXIII:72134 | 0.09 | 0.1  | 0.05 | 0.09 | 0.1  |
| chrXIII:73226 | 0.02 | 0.03 | 0.02 | 0.02 | 0.02 |
| chrXIII:75422 | 0.2  | 0.25 | 0.1  | 0.11 | 0.19 |
| chrXIII:82090 | -1   | -1   | -1   | -1   | -1   |
| chrXIII:85461 | 0.81 | 0.57 | 0.8  | -1   | 0.55 |

|               |      |      |       |         |      |
|---------------|------|------|-------|---------|------|
| chrXIII:91464 | 0.99 | 0.99 | 0.99  | 0.98    | 0.94 |
| chrXIII:99376 | 0.22 | 0.26 | -1    | -1      | 0.24 |
| chrXIV:27360  | 0.89 | 0.85 | 0.88  | 0.86    | 0.83 |
| chrXIV:35075  | 0.18 | 0.32 | 0.39  | 0.33    | -1   |
| chrXIV:41471  | 0.04 | 0.06 | 0.05  | 0.06    | 0.04 |
| chrXIV:48093  | -1   | -1   | -1    | -1      | -1   |
| chrXIV:54509  | 0.28 | -1   | -1    | -1      | -1   |
| chrXIV:61586  | 0.95 | 0.87 | 0.93  | 0.83    | 0.88 |
| chrXIV:62274  | 0.34 | 0.24 | 0.15  | 0.26    | 0.23 |
| chrXIV:64451  | 0.19 | 0.18 | 0.07  | 0.06    | 0.12 |
| chrXIV:72230  | 0.05 | 0.06 | 0.05  | 0.06    | 0.02 |
| chrXIV:72835  | 0.99 | 0.99 | 0.99  | 0.99    | 0.99 |
| chrXV:241026  | -1   | -1   | -1    | -1      | -1   |
| chrXV:242505  | -1   | -1   | -1 NA |         | -1   |
| chrXV:349599  | 0.96 | 0.96 | 0.93  | 0.94 NA |      |
| chrXV:373699  | 0.93 | 0.82 | 0.83  | 0.89    | 0.93 |
| chrXV:423735  | 0.97 | 0.96 | 0.94  | 0.96    | 0.95 |
| chrXV:552875  | 0.06 | 0.06 | 0.05  | 0.05    | 0.05 |
| chrXV:678791  | 0.01 | 0.01 | 0.01  | 0.01    | 0.01 |
| chrXV:80160   | 0.03 | 0.04 | 0.01  | 0.02    | 0.02 |
| chrXV:901194  | 0.11 | 0.13 | 0.07  | 0.07    | 0.12 |
| chrXV:92831   | 0.1  | 0.09 | 0.06  | 0.1     | 0.07 |
| chrXV:94291   | 0.12 | 0.12 | 0.08  | 0.13    | 0.09 |
| chrXVI:11501  | -1   | -1   | -1    | -1      | -1   |
| chrXVI:17296  | 0.31 | 0.19 | 0.07  | 0.17    | 0.21 |
| chrXVI:17346  | 0.12 | 0.21 | 0.27  | 0.12    | 0.22 |
| chrXVI:21844  | -1   | -1   | -1    | -1      | -1   |
| chrXVI:24402  | 0.98 | 0.97 | 0.97  | 0.96    | 0.98 |
| chrXVI:27110  | 0.99 | 0.99 | 0.99  | 0.99    | 0.99 |
| chrXVI:28194  | 0.03 | 0.03 | 0.02  | 0.02    | 0.03 |
| chrXVI:30510  | 0.15 | 0.16 | 0.13  | 0.21    | 0.21 |
| chrXVI:34559  | -1   | -1   | -1    | -1      | 0.25 |
| chrXVI:37839  | 0.02 | 0.03 | 0.01  | 0.01    | 0.02 |
| chrXVI:40475  | 0.18 | 0.16 | 0.1   | 0.12    | 0.17 |
| chrXVI:58270  | 0.07 | 0.08 | 0.06  | 0.07    | 0.05 |
| chrXVI:62337  | 0.95 | 0.97 | 0.91  | 0.87    | 0.71 |
| chrXVI:65396  | 0.08 | 0.08 | 0.05  | 0.06    | 0.06 |
| chrXVI:67354  | 0.99 | 1    | 0.99  | 0.99    | 0.99 |
| chrXVI:67828  | 0.14 | -1   | -1    | -1      | 0.13 |
| chrXVI:71714  | 0.98 | 0.96 | 0.96  | 0.96    | 0.96 |
| chrXVI:83349  | -1   | 0.92 | -1    | -1      | 0.93 |
| chrXVI:88318  | 0.06 | 0.08 | 0.08  | 0.1     | 0.08 |
| chrXVI:91107  | 0.08 | 0.09 | -1    | -1      | -1   |
| chrXVI:96234  | 0.93 | -1   | -1    | -1      | -1   |

| exp2 | salt1 | salt2 | DNA1 | DNA2 | ox1  |      |
|------|-------|-------|------|------|------|------|
| 0.03 | 0.05  | 0.04  | 0.04 | 0.03 | 0.03 | 0.03 |
| 0.11 | 0.06  | 0.19  | 0.14 | 0.13 | 0.04 | 0.04 |
| 0.42 | 0.29  | 0.42  | 0.39 | 0.33 | 0.28 | 0.28 |
| -1   | -1    | -1    | -1   | -1   | -1   | -1   |
| 0.14 | 0.15  | 0.26  | 0.26 | 0.12 | 0.14 | 0.14 |
| -1   | 0.9   | -1    | -1   | -1   | -1   | -1   |
| 0.1  | 0.12  | 0.09  | 0.08 | 0.1  | 0.09 | 0.09 |
| 0.05 | 0.06  | 0.11  | 0.12 | 0.05 | 0.05 | 0.05 |
| 0.06 | 0.06  | 0.08  | 0.11 | 0.05 | 0.05 | 0.05 |
| 0.92 | 0.95  | -1    | -1   | -1   | 0.9  | 0.9  |
| -1   | -1    | -1    | -1   | -1   | -1   | -1   |
| 0.63 | 0.74  | 0.82  | 0.84 | 0.87 | -1   | -1   |
| -1   | -1    | -1    | -1   | -1   | -1   | -1   |
| 0.03 | 0.03  | 0.05  | 0.05 | 0.02 | 0.03 | 0.03 |
| 0.04 | 0.05  | 0.11  | 0.09 | 0.03 | 0.03 | 0.03 |
| 0.11 | 0.14  | 0.14  | 0.16 | 0.08 | -1   | -1   |
| 0.02 | 0.01  | 0.02  | 0.02 | 0.01 | 0.02 | 0.02 |
| 0.93 | 0.97  | 0.92  | -1   | 0.93 | 0.94 | 0.94 |
| 0.01 | 0.01  | 0.02  | 0.02 | -1   | -1   | -1   |
| 0.89 | -1    | -1    | -1   | -1   | -1   | -1   |
| 0.01 | 0.01  | 0.01  | 0.02 | 0.01 | 0.01 | 0.01 |
| -1   | -1    | 0.83  | 0.76 | -1   | -1   | -1   |
| 0.13 | 0.16  | 0.28  | 0.2  | 0.14 | 0.12 | 0.12 |
| 0.67 | 0.88  | 0.63  | -1   | 0.66 | 0.87 | 0.87 |
| -1   | 0.15  | -1    | -1   | -1   | -1   | -1   |
| -1   | -1    | -1    | -1   | -1   | -1   | -1   |
| 0.09 | 0.07  | 0.14  | 0.14 | 0.09 | 0.1  | 0.1  |
| 0.91 | 0.92  | -1    | -1   | -1   | -1   | -1   |
| 0.07 | 0.06  | 0.1   | 0.09 | 0.05 | 0.06 | 0.06 |
| 0.02 | 0.02  | 0.06  | 0.04 | 0.01 | 0.02 | 0.02 |
| 0.07 | 0.08  | 0.06  | 0.07 | 0.06 | 0.04 | 0.04 |
| 0.9  | 0.94  | 0.89  | 0.88 | -1   | -1   | -1   |
| -1   | -1    | -1    | -1   | -1   | -1   | -1   |
| 0.01 | 0.03  | 0.06  | 0.04 | -1   | 0.02 | 0.02 |
| -1   | -1    | -1    | -1   | -1   | -1   | -1   |
| 0.01 | 0.01  | 0.02  | 0.02 | 0.01 | 0.01 | 0.01 |
| -1   | 0.26  | -1    | -1   | -1   | -1   | -1   |
| -1   | 0.21  | 0.17  | 0.19 | -1   | -1   | -1   |
| 0.2  | 0.24  | 0.48  | 0.3  | 0.23 | 0.28 | 0.28 |
| 0.88 | 0.92  | -1    | -1   | -1   | -1   | -1   |
| 0.05 | 0.06  | 0.12  | 0.1  | 0.05 | 0.05 | 0.05 |
| -1   | -1    | -1    | -1   | -1   | -1   | -1   |
| 0.49 | 0.43  | 0.6   | 0.87 | 0.37 | 0.39 | 0.39 |
| -1   | -1    | -1    | -1   | -1   | -1   | -1   |
| 0.98 | 0.99  | 0.94  | 0.96 | 0.99 | 0.97 | 0.97 |
| 0.03 | 0.03  | -1    | -1   | 0.05 | 0.03 | 0.03 |
| -1   | -1    | -1    | -1   | -1   | -1   | -1   |



|      |      |      |      |      |      |
|------|------|------|------|------|------|
| 0.04 | 0.04 | 0.08 | 0.1  | 0.04 | 0.04 |
| 0.02 | 0.02 | 0.05 | 0.05 | 0.02 | 0.02 |
| 0.13 | 0.22 | 0.36 | -1   | -1   | 0.23 |
| -1   | 0.24 | -1   | -1   | -1   | -1   |
| 0.02 | 0.01 | 0.03 | 0.04 | 0.01 | 0.02 |
| 0.06 | 0.05 | 0.15 | 0.08 | 0.08 | 0.08 |
| 0.46 | 0.43 | -1   | -1   | 0.42 | 0.66 |
| -1   | -1   | -1   | -1   | -1   | -1   |
| 0.02 | 0.02 | 0.07 | 0.05 | 0.03 | 0.03 |
| 0.04 | 0.02 | 0.04 | 0.04 | 0.01 | 0.02 |
| -1   | -1   | -1   | -1   | -1   | -1   |
| 0.14 | 0.16 | -1   | -1   | -1   | -1   |
| -1   | 0.1  | -1   | 0.09 | 0.09 | 0.08 |
| 0.07 | 0.07 | 0.08 | 0.08 | 0.07 | 0.06 |
| 0.02 | 0.03 | 0.04 | 0.03 | 0.02 | 0.01 |
| 0.95 | 0.95 | -1   | 0.92 | 0.88 | 0.91 |
| 0.29 | 0.37 | 0.28 | 0.25 | 0.27 | 0.24 |
| 0.08 | 0.07 | 0.07 | 0.1  | 0.06 | 0.07 |
| -1   | -1   | -1   | -1   | -1   | -1   |
| -1   | -1   | -1   | -1   | -1   | -1   |
| 0.78 | 0.68 | 0.9  | 0.9  | 0.88 | 0.63 |
| 0.04 | 0.04 | 0.08 | 0.1  | 0.03 | 0.03 |
| 0.16 | 0.14 | 0.43 | 0.31 | 0.15 | -1   |
| -1   | -1   | -1   | -1   | -1   | -1   |
| 0.94 | 0.89 | 0.91 | 0.91 | 0.87 | -1   |
| 0.04 | 0.03 | 0.04 | 0.04 | 0.02 | 0.03 |
| 0.94 | 0.91 | 0.91 | 0.87 | -1   | -1   |
| -1   | -1   | -1   | -1   | -1   | -1   |
| 0.03 | 0.02 | 0.05 | 0.03 | 0.03 | 0.02 |
| 1    | 1    | 1    | 1    | 1    | 1    |
| 0.11 | 0.1  | 0.61 | 0.25 | 0.12 | 0.12 |
| 0.03 | 0.04 | 0.05 | 0.06 | 0.03 | 0.03 |
| 0.17 | 0.14 | 0.18 | 0.23 | -1   | -1   |
| 0.99 | 0.99 | 0.99 | 0.98 | 0.98 | 0.98 |
| 0.02 | 0.02 | 0.04 | 0.04 | 0.02 | 0.03 |
| 0.44 | -1   | -1   | -1   | -1   | -1   |
| 0.08 | 0.08 | 0.1  | 0.12 | 0.07 | 0.07 |
| -1   | -1   | -1   | -1   | -1   | -1   |
| -1   | -1   | -1   | 0.62 | -1   | -1   |
| -1   | 0.03 | -1   | -1   | -1   | -1   |
| 0.93 | 0.94 | 0.9  | -1   | -1   | -1   |
| -1   | -1   | -1   | -1   | -1   | -1   |
| -1   | -1   | -1   | -1   | -1   | -1   |
| -1   | -1   | -1   | -1   | -1   | -1   |
| 0.07 | 0.11 | 0.12 | 0.12 | 0.05 | 0.08 |
| 0.02 | 0.02 | 0.04 | 0.04 | 0.02 | 0.02 |
| 0.29 | 0.39 | -1   | -1   | 0.32 | -1   |
| 0.34 | 0.54 | -1   | -1   | -1   | -1   |
| 0.87 | 0.79 | -1   | -1   | -1   | -1   |

|      |      |      |      |         |      |
|------|------|------|------|---------|------|
| -1   | -1   | -1   | -1   | -1      | -1   |
| 0.09 | 0.06 | 0.12 | 0.1  | 0.07    | 0.06 |
| 0.69 | -1   | 0.82 | -1   | -1      | -1   |
| 0.18 | 0.26 | -1   | -1   | 0.25    | -1   |
| 0.08 | 0.05 | 0.1  | -1   | 0.06    | -1   |
| -1   | -1   | -1   | -1   | -1      | -1   |
| 0.05 | 0.05 | 0.04 | 0.06 | 0.03    | 0.05 |
| 0.01 | 0.01 | 0.02 | 0.02 | 0.01    | 0.01 |
| 0.02 | 0.02 | 0.05 | 0.04 | 0.02    | 0.02 |
| -1   | -1   | 0.3  | -1   | -1      | -1   |
| 0.02 | 0.03 | 0.05 | -1   | 0.04    | -1   |
| 0.37 | 0.36 | 0.51 | 0.44 | 0.39    | 0.27 |
| 0.02 | 0.03 | 0.04 | 0.05 | 0.02    | 0.02 |
| 0.14 | 0.23 | -1   | 0.33 | 0.28    | -1   |
| 0.06 | 0.07 | 0.1  | 0.1  | 0.05    | 0.05 |
| 1    | 1    | 1    | 1    | 1       | 1    |
| 0.15 | 0.16 | 0.22 | 0.25 | 0.19    | 0.19 |
| 0.98 | 0.98 | 0.89 | -1   | 0.87    | 0.92 |
| -1   | -1   | -1   | -1   | -1      | -1   |
| 0.91 | 0.92 | 0.92 | 0.93 | 0.86    | 0.9  |
| 0.02 | 0.02 | -1   | -1   | -1      | -1   |
| 1    | 0.99 | 0.82 | 0.87 | 0.97    | 0.95 |
| -1   | -1   | -1   | -1   | -1      | -1   |
| -1   | -1   | -1   | -1   | -1      | -1   |
| 0.03 | 0.03 | 0.07 | 0.06 | 0.03    | 0.03 |
| -1   | -1   | -1   | -1   | -1      | -1   |
| 0.04 | 0.05 | 0.09 | 0.12 | 0.04    | 0.05 |
| 0.05 | 0.05 | 0.08 | 0.07 | 0.04    | 0.05 |
| 0.09 | 0.13 | 0.11 | 0.1  | 0.07    | 0.09 |
| 0.03 | 0.02 | 0.05 | 0.06 | 0.03    | 0.03 |
| 0.94 | 0.96 | -1   | -1   | 0.95 NA |      |
| 0.04 | 0.04 | 0.09 | 0.09 | 0.03    | 0.04 |
| -1   | -1   | -1   | -1   | -1      | -1   |
| 0.14 | 0.24 | 0.17 | 0.13 | 0.18    | 0.22 |
| -1   | 0.34 | -1   | -1   | -1      | -1   |
| 0.01 | 0.01 | 0.02 | 0.03 | 0.01    | 0.01 |
| 0.01 | 0.01 | 0.01 | 0.02 | 0.01    | 0.01 |
| 0.11 | 0.12 | 0.33 | -1   | -1      | -1   |
| -1   | -1   | -1   | -1   | -1      | -1   |
| 0.03 | 0.03 | 0.03 | 0.03 | 0.02    | 0.04 |
| 0.99 | 0.99 | 0.97 | 0.94 | 0.97    | 0.98 |
| 0.39 | 0.38 | 0.78 | 0.71 | -1      | -1   |
| 0.1  | 0.13 | 0.21 | 0.23 | 0.14    | 0.15 |
| 0.23 | -1   | 0.53 | 0.35 | -1      | -1   |
| 0.11 | 0.07 | 0.32 | 0.21 | 0.11    | 0.09 |
| 0.03 | 0.02 | 0.05 | 0.05 | 0.02    | 0.02 |
| 0.18 | 0.2  | 0.29 | 0.54 | 0.18    | 0.15 |
| -1   | -1   | -1   | -1   | -1      | -1   |
| 0.86 | 0.72 | -1   | -1   | -1      | -1   |

|      |         |      |      |       |      |
|------|---------|------|------|-------|------|
| 0.96 | 0.99    | 0.97 | 0.96 | 0.97  | 0.97 |
| 0.23 | 0.31    | -1   | -1   | 0.18  | 0.13 |
| 0.65 | 0.9     | 0.92 | 0.94 | 0.72  | 0.84 |
| 0.23 | 0.17    | -1   | -1   | -1    | -1   |
| 0.04 | 0.04    | 0.07 | -1   | 0.06  | 0.07 |
| -1   | -1      | -1   | -1   | -1    | -1   |
| -1   | -1      | -1   | -1   | -1    | -1   |
| 0.89 | 0.84    | 0.87 | 0.85 | 0.86  | 0.85 |
| 0.21 | 0.22    | 0.48 | 0.29 | 0.2   | 0.22 |
| 0.11 | 0.17    | 0.27 | 0.21 | 0.21  | 0.17 |
| 0.03 | 0.06    | 0.22 | -1   | -1    | -1   |
| 0.99 | 0.99    | 0.98 | 0.98 | 0.97  | 0.97 |
| -1   | -1      | -1   | -1   | -1    | -1   |
| -1   | -1      | 0.92 | 0.94 | -1    | -1   |
| -1   | 0.92 NA | NA   |      | -1    | -1   |
| 0.94 | 0.92    | 0.92 | 0.84 | 0.88  | -1   |
| 0.97 | 0.98    | 0.96 | 0.96 | 0.94  | 0.9  |
| 0.05 | 0.05    | 0.1  | 0.09 | 0.05  | 0.06 |
| 0.01 | 0.01    | 0.02 | 0.02 | 0.01  | 0.01 |
| 0.02 | 0.03    | 0.04 | 0.04 | 0.01  | 0.01 |
| 0.08 | 0.1     | 0.08 | 0.14 | 0.05  | 0.05 |
| 0.1  | 0.1     | 0.14 | 0.14 | 0.11  | 0.09 |
| 0.1  | 0.12    | 0.1  | 0.12 | 0.1   | 0.1  |
| -1   | -1      | -1   | -1   | -1    | -1   |
| 0.19 | 0.33    | -1   | -1   | 0.34  | 0.31 |
| 0.16 | 0.13    | 0.06 | 0.08 | 0.1   | 0.1  |
| -1   | -1      | -1   | -1   | -1    | -1   |
| 0.98 | 0.98    | 0.97 | 0.94 | 0.96  | 0.94 |
| 0.99 | 0.99    | 0.98 | 0.98 | 0.99  | 0.99 |
| 0.03 | 0.03    | 0.04 | 0.05 | 0.02  | 0.03 |
| 0.06 | 0.19    | 0.3  | 0.39 | 0.15  | 0.11 |
| -1   | -1      | -1   | -1   | -1    | -1   |
| 0.02 | 0.02    | 0.04 | 0.06 | 0.02  | 0.02 |
| 0.18 | 0.17    | 0.21 | 0.15 | 0.27  | 0.26 |
| 0.06 | 0.06    | 0.15 | -1   | 0.05  | 0.05 |
| 0.72 | 0.77    | -1   | -1   | 0.74  | -1   |
| 0.06 | 0.07    | 0.11 | 0.11 | 0.06  | 0.06 |
| 0.99 | 0.99    | 0.96 | 0.97 | 0.99  | 0.98 |
| 0.21 | 0.18    | -1   | -1   | -1    | -1   |
| 0.96 | 0.97    | 0.97 | 0.92 | 0.92  | 0.94 |
| -1   | -1      | 0.94 | -1   | -1 NA |      |
| 0.08 | 0.08    | 0.11 | 0.17 | 0.07  | 0.07 |
| -1   | 0.07    | -1   | -1   | -1    | -1   |
| 0.92 | 0.88    | -1   | -1   | -1    | -1   |

| ox2 | heat1 | heat2 | stationary1 | stationary2 | sc1  |      |
|-----|-------|-------|-------------|-------------|------|------|
|     | 0.01  | 0.01  | 0.03        | 0.03        | 0.15 | 0.15 |
|     | 0.08  | 0.09  | 0.09        | 0.1         | 0.48 | 0.44 |
|     | 0.41  | -1    | 0.34        | 0.43        | 0.94 | 0.93 |
|     | -1    | -1    | -1          | -1          | 0.91 | 0.93 |
|     | 0.11  | 0.07  | 0.17        | 0.18        | 0.39 | 0.35 |
| NA  | NA    |       | -1          | -1          | -1   | -1   |
|     | 0.11  | 0.08  | 0.13        | 0.11        | 0.63 | 0.64 |
|     | 0.02  | 0.02  | 0.07        | 0.08        | 0.29 | 0.23 |
|     | 0.04  | 0.05  | 0.08        | 0.07        | 0.6  | 0.56 |
|     | 0.93  | -1    | 0.95        | 0.94        | 0.99 | 0.93 |
|     | -1    | -1    | -1          | -1          | 0.56 | 0.47 |
|     | -1    | -1    | -1          | -1          | 0.93 | 0.95 |
|     | -1    | -1    | -1          | -1          | -1   | -1   |
|     | 0.02  | 0.02  | 0.07        | 0.06        | 0.36 | 0.37 |
|     | 0.02  | 0.01  | 0.06        | 0.05        | 0.41 | 0.35 |
|     | -1    | -1    | 0.1         | 0.07        | 0.32 | 0.32 |
|     | 0.01  | 0.01  | 0.04        | 0.04        | 0.17 | 0.14 |
|     | 0.91  | -1    | 0.88        | 0.94        | 0.94 | 0.92 |
|     | -1    | 0.01  | 0.02        | 0.02        | 0.15 | 0.13 |
|     | -1    | -1    | -1          | -1          | -1   | -1   |
|     | 0     | 0     | 0.02        | 0.02        | 0.2  | 0.17 |
|     | -1    | -1    | -1          | -1          | -1   | -1   |
|     | 0.03  | 0.02  | 0.14        | 0.12        | 0.37 | 0.47 |
|     | -1    | -1    | 0.64        | 0.62        | 0.9  | 0.94 |
|     | -1    | -1    | -1          | -1          | -1   | -1   |
|     | -1    | -1    | -1          | -1          | -1   | -1   |
|     | 0.04  | 0.05  | 0.14        | 0.15        | 0.76 | 0.84 |
|     | -1 NA |       | -1          | 0.89        | -1   | -1   |
|     | 0.03  | 0.02  | 0.13        | 0.11        | 0.46 | 0.4  |
|     | 0.01  | 0.01  | 0.03        | 0.03        | 0.27 | 0.24 |
|     | 0.04  | 0.04  | 0.08        | 0.07        | 0.14 | 0.14 |
|     | 0.91  | -1    | -1          | 0.73        | 0.96 | 0.95 |
|     | -1    | -1    | -1          | -1          | -1   | -1   |
|     | 0.01  | 0.01  | 0.04        | 0.04        | 0.42 | 0.52 |
|     | -1 NA |       | -1          | -1          | 0.95 | 0.91 |
|     | 0.01  | 0.01  | 0.02        | 0.02        | 0.28 | 0.26 |
|     | -1    | -1    | -1          | -1          | 0.91 | 0.94 |
|     | 0.18  | -1    | -1          | -1          | 0.45 | -1   |
|     | 0.19  | 0.09  | 0.26        | 0.28        | 0.63 | 0.75 |
|     | -1    | -1    | -1          | -1          | -1   | 0.83 |
|     | 0.04  | 0.03  | 0.09        | 0.1         | 0.77 | 0.7  |
|     | -1    | -1    | -1          | -1          | 0.32 | 0.4  |
|     | 0.19  | 0.11  | 0.31        | 0.28        | 0.32 | 0.27 |
|     | -1    | -1    | -1          | -1          | -1   | -1   |
|     | 0.98  | 0.97  | 0.98        | 0.98        | 0.95 | 0.92 |
|     | 0.04  | -1    | 0.05        | 0.07        | 0.28 | 0.24 |
|     | -1    | -1    | -1          | -1          | -1   | -1   |

|    |      |      |      |      |      |      |
|----|------|------|------|------|------|------|
|    | 0.02 | 0.02 | 0.08 | 0.08 | 0.47 | 0.42 |
|    | 0.01 | 0.01 | 0.05 | 0.05 | 0.25 | 0.21 |
|    | -1   | -1   | 0.2  | 0.17 | 0.26 | 0.33 |
|    | -1   | -1   | -1   | 0.22 | 0.85 | 0.61 |
|    | 0.01 | 0.01 | 0.02 | 0.02 | 0.2  | 0.16 |
|    | 0.03 | 0.03 | 0.09 | 0.07 | 0.49 | 0.53 |
|    | 0.63 | 0.73 | 0.53 | 0.4  | -1   | 0.7  |
|    | -1   | -1   | -1   | -1   | -1   | -1   |
|    | 0.02 | 0.02 | 0.05 | 0.06 | 0.28 | 0.24 |
|    | 0.01 | 0.01 | 0.04 | 0.03 | 0.25 | 0.24 |
|    | -1   | -1   | -1   | -1   | 0.83 | 0.63 |
|    | -1   | -1   | -1   | -1   | 0.67 | 0.6  |
|    | -1   | -1   | 0.07 | 0.1  | 0.59 | 0.53 |
|    | 0.06 | 0.06 | 0.07 | 0.09 | 0.34 | 0.3  |
|    | 0.03 | -1   | 0.02 | 0.02 | 0.18 | 0.16 |
|    | -1   | -1   | 0.87 | 0.88 | 0.9  | 0.84 |
|    | 0.22 | 0.24 | 0.31 | 0.29 | 0.59 | 0.46 |
|    | 0.07 | 0.06 | 0.12 | 0.12 | 0.47 | 0.53 |
| NA | NA   |      | 0.83 | -1   | -1   | -1   |
|    | -1   | -1   | -1   | -1   | -1   | -1   |
|    | 0.52 | 0.56 | 0.93 | 0.96 | 0.93 | 0.95 |
|    | 0.02 | 0.02 | 0.07 | 0.06 | 0.31 | 0.29 |
|    | -1   | -1   | 0.19 | 0.16 | 0.41 | 0.35 |
|    | -1   | -1   | -1   | -1   | -1   | -1   |
|    | 0.94 | -1   | 0.87 | 0.94 | 0.96 | 0.93 |
|    | 0.02 | 0.02 | 0.03 | 0.03 | 0.19 | 0.16 |
|    | -1   | -1   | -1   | -1   | -1   | -1   |
|    | -1   | -1   | -1   | -1   | -1   | -1   |
|    | 0.02 | 0.02 | 0.05 | 0.06 | 0.27 | 0.2  |
|    | 1    | 1    | 1    | 1    | 1    | 0.99 |
|    | 0.21 | 0.13 | 0.17 | 0.19 | 0.4  | 0.31 |
|    | 0.02 | 0.02 | 0.03 | 0.03 | 0.21 | 0.19 |
|    | -1   | -1   | 0.2  | 0.13 | 0.54 | 0.51 |
|    | 0.98 | 0.96 | 0.98 | 0.99 | 0.97 | 0.97 |
|    | 0.01 | 0.01 | 0.02 | 0.03 | 0.29 | 0.25 |
|    | -1   | -1   | -1   | 0.61 | 0.99 | 0.99 |
|    | 0.05 | 0.05 | 0.07 | 0.09 | 0.51 | 0.42 |
|    | -1   | -1   | -1   | -1   | -1   | -1   |
|    | -1   | -1   | -1   | -1   | 0.79 | 0.81 |
|    | -1   | -1   | 0.04 | -1   | 0.35 | 0.23 |
|    | -1   | -1   | 0.94 | 0.82 | -1   | -1   |
| NA | NA   |      | -1   | -1   | -1   | -1   |
|    | -1   | -1   | -1   | -1   | 0.33 | 0.31 |
|    | -1   | -1   | -1   | -1   | -1   | NA   |
|    | 0.06 | 0.04 | 0.12 | 0.11 | 0.46 | 0.35 |
|    | 0.01 | 0.01 | 0.03 | 0.03 | 0.37 | 0.34 |
|    | 0.87 | -1   | 0.18 | 0.2  | 1    | 1    |
|    | -1   | -1   | -1   | -1   | -1   | -1   |
|    | -1   | -1   | -1   | -1   | -1   | -1   |

|    |      |      |      |      |      |      |
|----|------|------|------|------|------|------|
|    | -1   | -1   | -1   | -1   | -1   | -1   |
|    | 0.05 | -1   | 0.06 | 0.08 | 0.15 | 0.2  |
|    | -1   | -1   | -1   | -1   | 0.9  | 0.94 |
|    | 0.32 | -1   | 0.32 | 0.21 | 0.6  | 0.66 |
|    | 0.05 | 0.04 | 0.1  | 0.11 | 0.52 | 0.44 |
|    | -1   | -1   | -1   | -1   | -1   | -1   |
|    | 0.04 | 0.03 | 0.08 | 0.05 | 0.2  | 0.24 |
|    | 0.01 | 0.01 | 0.01 | 0.02 | 0.21 | 0.22 |
|    | 0.01 | 0.02 | 0.03 | 0.03 | 0.17 | 0.17 |
|    | -1   | -1   | -1   | -1   | 0.28 | 0.26 |
|    | 0.02 | -1   | 0.05 | 0.06 | 0.39 | -1   |
|    | 0.4  | 0.38 | 0.45 | 0.26 | 0.67 | 0.75 |
|    | 0.01 | 0.01 | 0.04 | 0.04 | 0.18 | 0.17 |
|    | 0.31 | -1   | -1   | 0.34 | 0.69 | 0.92 |
|    | 0.04 | 0.04 | 0.06 | 0.08 | 0.66 | 0.49 |
|    | 1    | 1    | 1    | 1    | 1    | 1    |
|    | 0.18 | 0.15 | 0.27 | 0.24 | 0.37 | 0.36 |
|    | 0.95 | 0.92 | 0.97 | 0.97 | 0.94 | 0.97 |
|    | -1   | -1   | -1   | -1   | 0.73 | 0.93 |
| NA | NA   |      | 0.94 | 0.91 | 0.94 | 0.97 |
|    | -1   | -1   | 0.03 | 0.03 | 0.19 | 0.15 |
|    | 0.98 | 0.99 | 0.96 | 0.97 | 1    | 1    |
|    | -1   | -1   | -1   | -1   | -1   | -1   |
|    | -1   | -1   | -1   | -1   | -1   | -1   |
|    | 0.01 | 0.01 | 0.06 | 0.07 | 0.42 | 0.31 |
|    | -1   | -1   | -1   | -1   | -1   | -1   |
|    | 0.03 | 0.02 | 0.1  | 0.09 | 0.48 | 0.5  |
|    | 0.03 | 0.03 | 0.06 | 0.06 | 0.53 | 0.45 |
|    | 0.08 | 0.09 | 0.09 | 0.09 | 0.23 | 0.22 |
|    | 0.01 | 0.01 | 0.05 | 0.04 | 0.33 | 0.31 |
|    | -1   | -1   | -1   | 0.93 | 0.95 | 0.94 |
|    | 0.02 | 0.01 | 0.08 | 0.07 | 0.38 | 0.4  |
|    | -1   | -1   | -1   | -1   | -1   | -1   |
|    | 0.13 | 0.05 | 0.16 | 0.22 | -1   | -1   |
|    | -1   | -1   | -1   | -1   | -1   | -1   |
|    | 0.01 | 0    | 0.02 | 0.02 | 0.3  | 0.22 |
|    | 0    | 0    | 0.01 | 0.01 | 0.22 | 0.19 |
|    | -1   | -1   | -1   | -1   | 0.71 | 0.83 |
|    | -1   | -1   | -1   | -1   | -1   | -1   |
|    | 0.03 | 0.03 | 0.04 | 0.04 | 0.2  | 0.22 |
|    | 0.99 | 0.99 | 0.98 | 0.99 | 0.96 | 0.97 |
|    | -1   | -1   | -1   | 0.22 | 0.33 | 0.72 |
|    | 0.07 | 0.04 | 0.24 | 0.22 | 0.74 | 0.63 |
|    | -1   | -1   | -1   | -1   | 0.4  | 0.35 |
|    | 0.08 | 0.09 | 0.13 | 0.12 | 0.42 | 0.47 |
|    | 0.02 | 0.02 | 0.05 | 0.05 | 0.49 | 0.36 |
|    | 0.06 | 0.04 | 0.43 | 0.42 | 0.84 | 0.83 |
|    | -1   | -1   | -1   | -1   | -1   | -1   |
|    | 0.77 | -1   | 0.58 | 0.52 | 0.82 | 0.9  |

|    |       |      |       |      |      |      |
|----|-------|------|-------|------|------|------|
|    | 0.92  | 0.92 | 0.97  | 0.97 | 0.93 | 0.89 |
|    | -1    | -1   | 0.29  | -1   | -1   | 0.95 |
|    | -1    | -1   | 0.77  | 0.88 | 0.91 | 0.87 |
|    | -1    | -1   | -1    | 0.35 | 0.92 | 0.89 |
|    | 0.03  | 0.02 | 0.16  | 0.19 | 0.57 | 0.71 |
|    | -1    | -1   | -1    | -1   | -1   | -1   |
|    | -1    | -1   | -1    | -1   | 0.86 | 0.94 |
|    | 0.85  | 0.9  | 0.83  | 0.93 | 0.94 | 0.95 |
|    | -1    | -1   | 0.23  | 0.24 | 0.36 | 0.5  |
|    | 0.13  | 0.13 | 0.08  | 0.1  | -1   | 0.11 |
|    | 0.08  | -1   | 0.06  | 0.1  | 0.39 | 0.89 |
|    | 0.99  | 0.98 | 0.98  | 0.98 | 0.91 | 0.96 |
|    | -1 NA |      | -1    | -1   | 0.8  | 0.81 |
| NA | NA    |      | 0.79  | -1   | -1   | -1   |
|    | 0.93  | -1   | -1    | -1   | 0.94 | 0.98 |
|    | 0.86  | -1   | -1    | 0.94 | 0.79 | 0.92 |
|    | -1    | -1   | 0.94  | 0.94 | 0.96 | 0.95 |
|    | 0.03  | 0.02 | 0.08  | 0.08 | 0.36 | 0.32 |
|    | 0.01  | 0.01 | 0.02  | 0.02 | 0.46 | 0.45 |
|    | 0.01  | 0.01 | 0.04  | 0.03 | 0.54 | 0.52 |
|    | 0.04  | 0.03 | 0.12  | 0.11 | 0.66 | 0.55 |
|    | 0.1   | 0.12 | 0.13  | 0.15 | 0.56 | 0.51 |
|    | 0.09  | 0.09 | 0.1   | 0.13 | 0.26 | 0.19 |
| NA | NA    |      | -1    | -1   | 0.91 | 0.92 |
|    | 0.11  | 0.15 | 0.15  | 0.24 | 0.92 | 0.87 |
|    | 0.09  | 0.06 | 0.15  | 0.12 | 0.13 | 0.14 |
|    | -1    | -1   | -1    | -1   | -1   | -1   |
|    | 0.96  | 0.9  | 0.96  | 0.97 | 0.97 | 0.97 |
|    | 0.97  | 0.97 | 0.98  | 0.99 | 0.98 | 0.99 |
|    | 0.01  | 0.01 | 0.04  | 0.04 | 0.25 | 0.23 |
|    | 0.11  | 0.17 | 0.22  | 0.21 | 0.53 | 0.6  |
|    | -1    | -1   | -1    | -1   | -1   | -1   |
|    | 0.01  | 0.01 | 0.03  | 0.03 | 0.23 | 0.22 |
|    | 0.09  | 0.08 | 0.14  | 0.13 | 0.73 | 0.59 |
|    | 0.09  | -1   | 0.08  | 0.05 | 0.27 | 0.24 |
|    | -1    | -1   | 0.69  | 0.4  | 0.96 | 0.94 |
|    | 0.05  | 0.05 | 0.1   | 0.1  | 0.57 | 0.58 |
|    | 0.98  | 0.99 | 0.99  | 0.98 | 0.97 | 0.98 |
|    | -1    | -1   | 0.25  | 0.18 | 0.62 | 0.52 |
|    | 0.94  | -1   | 0.96  | 0.97 | -1   | 0.88 |
| NA | NA    |      | -1 NA |      | 0.92 | -1   |
|    | 0.04  | 0.06 | 0.05  | 0.07 | 0.29 | 0.23 |
|    | -1    | -1   | -1    | -1   | -1   | -1   |
|    | -1    | -1   | -1    | -1   | -1   | -1   |

| sc2  | glycerol1 | glycerol2 | calcium1 | calcium2 | lowN1 |      |
|------|-----------|-----------|----------|----------|-------|------|
| 0.03 | 0.03      | 0.04      | 0.03     | 0.03     | 0.03  | 0.02 |
| 0.13 | 0.08      | 0.08      | 0.09     | 0.16     |       | 0.05 |
| 0.43 | 0.44      | 0.31      | 0.46     | 0.42     |       | 0.42 |
| -1   | -1        | -1        | -1       | -1       |       | -1   |
| 0.14 | 0.15      | 0.2       | 0.23     | 0.13     |       | 0.16 |
| -1   | -1        | -1        | -1       | -1       |       | -1   |
| 0.18 | 0.15      | 0.14      | 0.11     | 0.1      |       | 0.1  |
| 0.03 | 0.03      | 0.05      | 0.05     | 0.05     |       | 0.03 |
| 0.04 | 0.04      | 0.04      | 0.04     | 0.03     |       | 0.03 |
| 0.93 | 0.93      | -1        | -1       | 0.91     |       | -1   |
| -1   | -1        | -1        | -1       | -1       |       | -1   |
| -1   | -1        | -1        | -1       | -1       |       | -1   |
| -1   | -1        | -1        | -1       | -1       |       | -1   |
| 0.02 | 0.02      | 0.04      | 0.04     | 0.03     |       | 0.03 |
| 0.03 | 0.03      | 0.05      | 0.06     | 0.04     |       | 0.03 |
| -1   | 0.17      | -1        | -1       | -1       |       | -1   |
| 0.02 | 0.01      | 0.02      | 0.02     | 0.02     |       | 0.02 |
| -1   | 0.85      | 0.95      | 0.96     | 0.92     |       | 0.89 |
| -1   | -1        | 0.01      | 0.01     | -1       |       | -1   |
| -1   | -1        | -1        | -1       | -1       |       | -1   |
| 0.01 | 0.01      | 0.01      | 0.01     | 0.01     |       | 0.01 |
| -1   | -1        | -1        | -1       | -1       |       | -1   |
| 0.18 | 0.14      | 0.17      | 0.15     | 0.1      |       | 0.09 |
| -1   | 0.79      | 0.9       | 0.84     | 0.77     |       | 0.81 |
| -1   | -1        | -1        | -1       | -1       |       | -1   |
| -1   | -1        | -1        | -1       | -1       |       | -1   |
| 0.04 | 0.05      | 0.1       | 0.09     | 0.09     |       | 0.11 |
| -1   | 0.88      | -1        | 0.89     | -1       |       | -1   |
| 0.06 | 0.08      | 0.08      | 0.08     | 0.08     |       | 0.06 |
| 0.01 | 0.01      | 0.02      | 0.01     | 0.01     |       | 0.01 |
| 0.05 | 0.05      | 0.06      | 0.06     | 0.05     |       | 0.05 |
| -1   | 0.94      | 0.9       | 0.92     | 0.77     |       | -1   |
| -1   | -1        | -1        | -1       | -1       |       | -1   |
| -1   | 0.01      | 0.03      | 0.03     | 0.02     |       | 0.02 |
| -1   | -1        | -1        | -1       | -1 NA    |       |      |
| 0.01 | 0.01      | 0.01      | 0.01     | 0.01     |       | 0.01 |
| -1   | -1        | -1        | -1       | -1       |       | -1   |
| -1   | -1        | -1        | -1       | -1       |       | -1   |
| 0.15 | 0.15      | 0.34      | 0.33     | 0.36     |       | 0.24 |
| -1   | 0.86      | -1        | -1       | -1       |       | -1   |
| 0.05 | 0.06      | 0.07      | 0.08     | 0.06     |       | 0.06 |
| -1   | -1        | -1        | -1       | -1       |       | -1   |
| 0.26 | 0.34      | 0.51      | 0.52     | 0.44     |       | 0.46 |
| -1   | -1        | -1        | -1       | -1       |       | -1   |
| 0.97 | 0.98      | 0.97      | 0.96     | 0.96     |       | 0.93 |
| 0.03 | 0.02      | 0.03      | 0.02     | -1       |       | -1   |
| -1   | -1        | -1        | -1       | -1       |       | -1   |



|      |       |      |      |      |      |
|------|-------|------|------|------|------|
| 0.03 | 0.03  | 0.04 | 0.05 | 0.03 | 0.03 |
| 0.02 | 0.02  | 0.02 | 0.02 | 0.02 | 0.02 |
| -1   | 0.29  | -1   | 0.23 | -1   | -1   |
| -1   | -1    | -1   | -1   | -1   | -1   |
| 0.01 | 0.01  | 0.02 | 0.02 | 0.01 | 0.01 |
| 0.03 | 0.05  | 0.05 | 0.07 | 0.04 | 0.05 |
| -1   | 0.47  | -1   | 0.49 | -1   | -1   |
| -1   | -1    | -1   | -1   | -1   | -1   |
| 0.02 | 0.02  | 0.02 | 0.02 | 0.02 | 0.01 |
| 0.02 | 0.02  | 0.03 | 0.03 | 0.02 | 0.02 |
| -1   | -1    | -1   | -1   | -1   | -1   |
| -1   | -1    | -1   | -1   | -1   | -1   |
| -1   | -1    | -1   | -1   | -1   | -1   |
| 0.06 | 0.05  | 0.06 | 0.06 | 0.05 | 0.05 |
| 0.02 | 0.02  | 0.02 | 0.03 | 0.02 | 0.01 |
| -1   | -1    | -1   | 0.9  | -1   | -1   |
| 0.27 | 0.22  | 0.26 | 0.31 | 0.27 | 0.23 |
| 0.07 | 0.07  | 0.08 | 0.07 | 0.06 | 0.05 |
| -1   | -1 NA | NA   | NA   | NA   | -1   |
| -1   | -1    | -1   | -1   | -1   | -1   |
| 0.63 | 0.61  | 0.61 | 0.55 | 0.39 | 0.43 |
| 0.04 | 0.04  | 0.05 | 0.06 | 0.04 | 0.04 |
| 0.18 | 0.2   | -1   | -1   | -1   | -1   |
| -1   | -1    | -1   | -1   | -1   | -1   |
| 0.91 | 0.85  | -1   | 0.91 | -1   | -1   |
| 0.03 | 0.04  | 0.03 | 0.03 | 0.02 | 0.02 |
| -1   | -1    | -1   | -1   | -1   | -1   |
| -1   | -1    | -1   | -1   | -1   | -1   |
| 0.02 | 0.02  | 0.03 | 0.02 | 0.02 | 0.02 |
| 1    | 1     | 1    | 1    | 1    | 1    |
| 0.16 | 0.15  | -1   | 0.19 | -1   | -1   |
| 0.02 | 0.03  | 0.03 | 0.03 | 0.03 | 0.03 |
| -1   | -1    | -1   | -1   | -1   | -1   |
| 0.98 | 0.97  | 0.97 | 0.97 | 0.97 | 0.98 |
| 0.02 | 0.02  | 0.03 | 0.04 | 0.03 | 0.03 |
| -1   | -1    | -1   | -1   | -1   | -1   |
| 0.05 | 0.06  | 0.06 | 0.06 | 0.06 | 0.05 |
| -1   | -1    | -1   | -1   | -1   | -1   |
| -1   | -1    | -1   | -1   | -1   | -1   |
| -1   | -1    | 0.04 | -1   | -1   | -1   |
| -1   | 0.9   | 0.93 | -1   | -1   | -1   |
| -1   | -1    | -1   | -1   | -1   | -1   |
| -1   | -1    | -1   | -1   | -1   | -1   |
| -1   | -1    | -1   | -1   | -1   | -1   |
| 0.07 | 0.07  | 0.09 | 0.1  | 0.08 | 0.05 |
| 0.01 | 0.02  | 0.03 | 0.03 | 0.02 | 0.02 |
| 0.17 | 0.26  | 0.14 | 0.17 | 0.37 | -1   |
| -1   | -1    | -1   | -1   | -1   | -1   |
| -1   | -1    | -1   | -1   | -1   | -1   |

|      |      |      |         |      |      |    |
|------|------|------|---------|------|------|----|
| -1   | -1   | -1   | -1      | -1   | -1   | -1 |
| 0.06 | 0.06 | 0.1  | 0.11    | 0.09 | 0.04 |    |
| -1   | -1   | -1   | -1      | -1   | -1   |    |
| -1   | -1   | -1   | 0.36    | -1   | -1   |    |
| 0.05 | 0.08 | 0.05 | 0.07    | 0.07 | 0.08 |    |
| -1   | -1   | -1   | -1      | -1   | -1   |    |
| 0.05 | 0.06 | 0.09 | 0.11    | 0.08 | 0.13 |    |
| 0.01 | 0.01 | 0.01 | 0.01    | 0.01 | 0.01 |    |
| 0.02 | 0.01 | 0.03 | 0.02    | 0.03 | 0.02 |    |
| -1   | -1   | -1   | -1      | -1   | -1   |    |
| 0.03 | -1   | 0.04 | 0.04    | -1   | -1   |    |
| 0.38 | 0.36 | 0.58 | 0.48    | 0.31 | 0.45 |    |
| 0.02 | 0.02 | 0.03 | 0.04    | 0.02 | 0.03 |    |
| -1   | 0.22 | -1   | -1      | -1   | -1   |    |
| 0.05 | 0.06 | 0.09 | 0.08    | 0.06 | 0.09 |    |
| 1    | 1    | 1    | 1       | 1    | 1    |    |
| 0.18 | 0.13 | 0.18 | 0.19    | 0.18 | 0.13 |    |
| 0.85 | 0.93 | 0.95 | 0.94    | 0.92 | 0.93 |    |
| -1   | -1   | -1   | -1      | -1   | -1   |    |
| -1   | 0.91 | -1   | 0.92 NA |      | -1   |    |
| -1   | -1   | -1   | -1      | -1   | -1   |    |
| 1    | 1    | 0.95 | 0.87    | 0.96 | 0.97 |    |
| -1   | -1   | -1   | -1      | -1   | -1   |    |
| -1   | -1   | -1   | -1      | -1   | -1   |    |
| 0.02 | 0.02 | 0.03 | 0.03    | 0.03 | 0.02 |    |
| -1   | -1   | -1   | -1      | -1   | -1   |    |
| 0.05 | 0.05 | 0.06 | 0.05    | 0.05 | 0.06 |    |
| 0.01 | 0.03 | 0.06 | 0.07    | 0.05 | 0.04 |    |
| 0.09 | 0.1  | 0.11 | 0.1     | 0.1  | 0.07 |    |
| 0.02 | 0.02 | 0.02 | 0.02    | 0.02 | 0.02 |    |
| -1   | -1   | -1   | -1      | -1   | -1   |    |
| 0.03 | 0.04 | 0.07 | 0.06    | 0.04 | 0.06 |    |
| -1   | -1   | -1   | -1      | -1   | -1   |    |
| 0.11 | 0.1  | 0.24 | 0.39    | 0.21 | 0.19 |    |
| -1   | -1   | -1   | -1      | -1   | -1   |    |
| 0.01 | 0.01 | 0.01 | 0.01    | 0.01 | 0.01 |    |
| 0    | 0    | 0.01 | 0.01    | 0    | -1   |    |
| -1   | -1   | -1   | -1      | -1   | -1   |    |
| -1   | -1   | -1   | -1      | -1   | -1   |    |
| 0.03 | 0.03 | 0.03 | 0.04    | 0.03 | 0.03 |    |
| 0.98 | 0.99 | 0.98 | 0.96    | 0.97 | 0.97 |    |
| -1   | -1   | 0.74 | 0.83    | -1   | -1   |    |
| 0.13 | 0.11 | 0.18 | 0.17    | 0.22 | 0.2  |    |
| -1   | -1   | -1   | -1      | -1   | -1   |    |
| 0.06 | 0.1  | 0.12 | 0.12    | 0.1  | 0.11 |    |
| 0.03 | 0.02 | 0.02 | 0.02    | 0.01 | 0.01 |    |
| 0.16 | 0.21 | 0.18 | 0.19    | 0.18 | 0.24 |    |
| -1   | -1   | -1   | -1      | -1   | -1   |    |
| -1   | -1   | -1   | -1      | -1   | -1   |    |

|    |      |       |      |       |      |      |
|----|------|-------|------|-------|------|------|
|    | 0.95 | 0.97  | 0.98 | 0.97  | 0.96 | 0.97 |
|    | -1   | 0.23  | -1   | -1    | -1   | -1   |
|    | 0.92 | 0.93  | 0.84 | 0.77  | 0.8  | 0.88 |
|    | -1   | -1    | -1   | -1    | -1   | -1   |
|    | 0.03 | 0.03  | 0.03 | 0.02  | 0.03 | 0.02 |
|    | -1   | -1    | -1   | -1    | -1   | -1   |
|    | -1   | -1    | -1   | -1    | -1   | -1   |
|    | 0.8  | 0.87  | 0.93 | 0.87  | 0.82 | 0.8  |
|    | 0.19 | 0.21  | 0.22 | 0.18  | -1   | 0.18 |
|    | 0.1  | 0.11  | 0.15 | 0.14  | 0.11 | 0.09 |
|    | -1   | -1    | -1   | 0.04  | 0.05 | -1   |
|    | 0.98 | 0.98  | 0.98 | 0.98  | 0.98 | 0.98 |
|    | -1   | -1    | -1   | -1    | -1   | -1   |
|    | -1   | -1 NA | NA   | NA    |      | -1   |
| NA | -1   | -1    | -1   | -1    | -1   | -1   |
|    | -1   | 0.9   | -1   | 0.89  | -1   | -1   |
|    | 0.94 | 0.95  | 0.92 | -1    | -1   | 0.93 |
|    | 0.09 | 0.07  | 0.08 | 0.05  | 0.07 | 0.08 |
|    | 0.01 | 0.01  | 0.01 | 0.01  | 0.01 | 0.01 |
|    | 0.01 | 0.02  | 0.03 | 0.03  | 0.02 | 0.01 |
|    | 0.03 | 0.06  | 0.11 | 0.11  | 0.09 | 0.1  |
|    | 0.11 | 0.1   | 0.1  | 0.12  | 0.1  | 0.09 |
|    | 0.1  | 0.09  | 0.1  | 0.11  | 0.08 | 0.08 |
|    | -1   | -1 NA |      | -1 NA |      | -1   |
|    | 0.13 | 0.08  | 0.32 | 0.24  | 0.15 | 0.1  |
|    | 0.09 | 0.12  | 0.14 | 0.15  | 0.1  | 0.14 |
|    | -1   | -1    | -1   | -1    | -1   | -1   |
|    | 0.93 | 0.96  | 0.95 | 0.96  | 0.94 | 0.96 |
|    | 0.97 | 0.98  | 0.98 | 0.97  | 0.98 | 0.98 |
|    | 0.02 | 0.02  | 0.03 | 0.03  | 0.02 | 0.02 |
|    | 0.11 | 0.15  | 0.28 | 0.18  | 0.19 | 0.1  |
|    | -1   | -1    | -1   | -1 NA |      | -1   |
|    | 0.01 | 0.01  | 0.03 | 0.03  | 0.02 | 0.02 |
|    | 0.12 | 0.07  | 0.17 | 0.19  | 0.13 | 0.08 |
|    | -1   | 0.09  | -1   | -1    | -1   | -1   |
|    | -1   | 0.85  | 0.92 | 0.91  | 0.94 | 0.87 |
|    | 0.06 | 0.07  | 0.08 | 0.09  | 0.08 | 0.07 |
|    | 0.98 | 0.99  | 0.99 | 0.99  | 0.98 | 0.98 |
|    | -1   | -1    | -1   | -1    | -1   | -1   |
|    | 0.97 | 0.93  | 0.91 | 0.92  | -1   | 0.92 |
|    | -1   | -1    | -1   | -1 NA | NA   |      |
|    | 0.11 | 0.1   | -1   | -1    | -1   | -1   |
|    | -1   | -1    | -1   | -1    | -1   | -1   |
|    | -1   | -1    | -1   | -1    | -1   | -1   |

| lowN2 | lowPhos1 | lowPhos2 | calcofluor1 | calcofluor2 | urea1 |  |  |
|-------|----------|----------|-------------|-------------|-------|--|--|
| 0.05  | 0.03     | 0.02     | 0.03        | 0.04        | 0.05  |  |  |
| 0.11  | 0.11     | 0.14     | 0.07        | 0.05        | 0.04  |  |  |
| 0.66  | 0.37     | 0.33     | 0.38        | 0.5         | 0.43  |  |  |
| -1    | -1       | -1       | -1          | -1          | -1    |  |  |
| 0.18  | 0.22     | 0.17     | 0.15        | 0.2         | 0.18  |  |  |
| -1    | -1       | -1       | -1          | NA          | NA    |  |  |
| 0.11  | 0.16     | 0.13     | 0.12        | 0.15        | 0.17  |  |  |
| 0.08  | 0.07     | 0.05     | 0.05        | 0.05        | 0.07  |  |  |
| 0.06  | 0.06     | 0.04     | 0.04        | 0.04        | 0.06  |  |  |
| -1    | -1       | 0.93     | 0.92        | -1          | 0.92  |  |  |
| -1    | -1       | -1       | -1          | -1          | -1    |  |  |
| -1    | -1       | -1       | 0.89        | -1          | -1    |  |  |
| -1    | -1       | -1       | -1          | -1          | -1    |  |  |
| 0.04  | 0.05     | 0.03     | 0.03        | 0.06        | 0.07  |  |  |
| 0.05  | 0.05     | 0.04     | 0.05        | 0.07        | 0.07  |  |  |
| 0.1   | 0.08     | -1       | -1          | -1          | -1    |  |  |
| 0.02  | 0.01     | 0.01     | 0.02        | 0.02        | 0.02  |  |  |
| -1    | -1       | 0.94     | 0.95        | 0.9         | 0.94  |  |  |
| -1    | -1       | -1       | -1          | -1          | 0.01  |  |  |
| -1    | -1       | -1       | -1          | -1          | -1    |  |  |
| 0.01  | 0.01     | -1       | 0.01        | 0.01        | 0.01  |  |  |
| -1    | -1       | -1       | -1          | -1          | -1    |  |  |
| 0.1   | 0.09     | 0.24     | 0.22        | 0.23        | 0.25  |  |  |
| 0.56  | 0.55     | 0.65     | -1          | 0.81        | 0.93  |  |  |
| -1    | -1       | -1       | -1          | -1          | -1    |  |  |
| -1    | -1       | -1       | -1          | -1          | -1    |  |  |
| 0.12  | 0.12     | 0.09     | 0.08        | 0.13        | 0.12  |  |  |
| -1    | -1       | -1       | 0.9         | -1          | -1    |  |  |
| 0.11  | 0.12     | 0.08     | 0.08        | 0.1         | 0.08  |  |  |
| 0.04  | 0.02     | 0.01     | 0.01        | 0.02        | 0.02  |  |  |
| 0.08  | 0.08     | 0.05     | 0.05        | 0.07        | 0.08  |  |  |
| -1    | -1       | 0.89     | 0.89        | -1          | 0.92  |  |  |
| -1    | -1       | -1       | -1          | -1          | -1    |  |  |
| 0.06  | 0.05     | -1       | -1          | 0.04        | 0.04  |  |  |
| -1    | -1       | -1       | -1          | NA          | -1    |  |  |
| 0.02  | 0.02     | 0.01     | 0.01        | 0.01        | 0.01  |  |  |
| -1    | -1       | -1       | -1          | -1          | -1    |  |  |
| -1    | -1       | -1       | -1          | -1          | -1    |  |  |
| 0.24  | 0.13     | 0.29     | 0.38        | 0.23        | 0.39  |  |  |
| -1    | -1       | -1       | -1          | -1          | -1    |  |  |
| 0.11  | 0.09     | 0.05     | 0.07        | 0.08        | 0.09  |  |  |
| -1    | -1       | -1       | -1          | -1          | -1    |  |  |
| 0.59  | 0.62     | 0.35     | 0.33        | 0.59        | 0.56  |  |  |
| -1    | -1       | -1       | -1          | -1          | -1    |  |  |
| 0.97  | 0.95     | 0.96     | 0.97        | 0.95        | 0.95  |  |  |
| 0.04  | -1       | 0.02     | 0.03        | 0.03        | 0.02  |  |  |
| -1    | -1       | -1       | -1          | -1          | -1    |  |  |

|      |      |      |      |      |      |
|------|------|------|------|------|------|
| 0.08 | 0.08 | 0.04 | 0.04 | 0.06 | 0.08 |
| 0.03 | 0.02 | 0.03 | 0.02 | 0.02 | 0.03 |
| 0.17 | -1   | 0.17 | -1   | -1   | 0.21 |
| -1   | -1   | -1   | -1   | -1   | -1   |
| 0.02 | 0.02 | 0.02 | 0.02 | 0.02 | 0.02 |
| 0.08 | 0.05 | 0.04 | 0.04 | 0.08 | 0.07 |
| 0.39 | -1   | 0.69 | -1   | 0.5  | 0.42 |
| -1   | -1   | -1   | -1   | -1   | -1   |
| 0.03 | 0.02 | 0.02 | 0.01 | 0.02 | 0.03 |
| 0.03 | 0.03 | 0.02 | 0.02 | 0.03 | 0.04 |
| -1   | -1   | -1   | -1   | -1   | -1   |
| -1   | -1   | -1   | -1   | -1   | -1   |
| 0.12 | 0.04 | -1   | -1   | 0.08 | -1   |
| 0.08 | 0.08 | 0.04 | 0.05 | 0.05 | 0.06 |
| 0.03 | 0.02 | -1   | 0.01 | 0.01 | 0.02 |
| -1   | -1   | -1   | 0.89 | -1   | 0.89 |
| 0.28 | 0.33 | 0.31 | 0.29 | 0.26 | 0.3  |
| 0.07 | 0.08 | 0.07 | 0.07 | 0.06 | 0.08 |
| -1   | -1   | -1   | -1   | -1   | -1   |
| -1   | -1   | -1   | -1   | -1   | -1   |
| 0.79 | 0.58 | 0.52 | 0.41 | 0.59 | 0.49 |
| 0.04 | 0.04 | 0.04 | 0.05 | 0.07 | 0.07 |
| 0.05 | 0.06 | -1   | 0.19 | 0.21 | 0.22 |
| -1   | -1   | -1   | -1   | -1   | -1   |
| -1   | -1   | 0.94 | 0.89 | 0.8  | 0.92 |
| 0.03 | 0.04 | 0.03 | 0.02 | 0.03 | 0.03 |
| -1   | -1   | -1   | -1   | -1   | -1   |
| -1   | -1   | -1   | -1   | -1   | -1   |
| 0.04 | 0.04 | 0.02 | 0.03 | 0.03 | 0.03 |
| 1    | 1    | 1    | 1    | 1    | 1    |
| -1   | 0.05 | 0.12 | 0.17 | 0.16 | 0.11 |
| 0.03 | 0.03 | 0.04 | 0.03 | 0.03 | 0.04 |
| 0.07 | 0.11 | -1   | -1   | -1   | -1   |
| 0.96 | 0.98 | 0.99 | 0.98 | 0.98 | 0.98 |
| 0.05 | 0.06 | 0.03 | 0.03 | 0.04 | 0.05 |
| 0.38 | 0.36 | -1   | -1   | -1   | -1   |
| 0.06 | 0.09 | 0.06 | 0.06 | 0.06 | 0.07 |
| -1   | -1   | -1   | -1   | -1   | -1   |
| -1   | -1   | -1   | -1   | -1   | -1   |
| -1   | -1   | -1   | -1   | -1   | 0.04 |
| -1   | -1   | -1   | 0.85 | -1   | -1   |
| -1   | -1   | -1   | -1   | -1   | -1   |
| -1   | -1   | -1   | -1   | -1   | -1   |
| -1   | -1   | -1   | -1   | -1   | -1   |
| 0.08 | 0.09 | 0.1  | 0.11 | 0.08 | 0.12 |
| 0.03 | 0.03 | 0.02 | 0.03 | 0.03 | 0.03 |
| 0.27 | 0.27 | 0.23 | 0.2  | 0.25 | 0.2  |
| -1   | -1   | -1   | -1   | -1   | -1   |
| -1   | -1   | -1   | -1   | -1   | -1   |

|    |      |       |      |         |      |      |
|----|------|-------|------|---------|------|------|
|    | -1   | -1    | -1   | -1      | -1   | -1   |
|    | 0.11 | 0.09  | 0.02 | 0.04    | 0.05 | 0.15 |
|    | -1   | 0.84  | -1   | -1      | -1   | -1   |
|    | -1   | -1    | -1   | 0.29    | -1   | 0.47 |
|    | 0.1  | 0.09  | 0.09 | 0.08    | 0.08 | 0.09 |
|    | -1   | -1    | -1   | -1      | -1   | -1   |
|    | 0.05 | 0.08  | 0.12 | 0.1     | 0.11 | 0.13 |
|    | 0.02 | 0.01  | 0.01 | 0.01    | 0.01 | 0.01 |
|    | 0.02 | 0.02  | 0.02 | 0.02    | 0.04 | 0.04 |
|    | -1   | -1    | -1   | -1      | -1   | -1   |
|    | -1   | -1    | -1   | -1      | 0.05 | 0.04 |
|    | 0.26 | 0.22  | 0.24 | 0.28    | 0.46 | 0.34 |
|    | 0.04 | 0.04  | 0.02 | 0.03    | 0.03 | 0.04 |
|    | -1   | 0.33  | -1   | 0.27    | 0.29 | 0.42 |
|    | 0.04 | 0.05  | 0.11 | 0.11    | 0.11 | 0.11 |
|    | 1    | 1     | 1    | 1       | 1    | 1    |
|    | 0.23 | 0.22  | 0.13 | 0.14    | 0.21 | 0.22 |
|    | 0.97 | 0.95  | 0.94 | 0.91    | 0.98 | 0.97 |
|    | -1   | -1    | -1   | -1      | -1   | -1   |
|    | 0.84 | 0.83  | 0.88 | 0.9     | 0.88 | -1   |
|    | -1   | -1    | -1   | -1      | -1   | -1   |
|    | 1    | 1     | 0.95 | 0.93    | 0.99 | 0.99 |
|    | -1   | -1    | -1   | -1      | -1   | -1   |
|    | -1   | -1    | -1   | -1      | -1   | -1   |
|    | 0.04 | 0.03  | 0.02 | 0.03    | 0.03 | 0.04 |
|    | -1   | -1    | -1   | -1      | -1   | -1   |
|    | 0.07 | 0.07  | 0.06 | 0.05    | 0.06 | 0.1  |
|    | 0.04 | 0.04  | 0.05 | 0.05    | 0.07 | 0.06 |
|    | 0.07 | 0.04  | 0.08 | 0.08    | 0.09 | 0.11 |
|    | 0.03 | 0.04  | 0.02 | 0.02    | 0.03 | 0.03 |
| NA |      | -1 NA |      | 0.93 NA |      | -1   |
|    | 0.07 | 0.1   | 0.03 | 0.04    | 0.06 | 0.09 |
|    | -1   | -1    | -1   | -1      | -1   | -1   |
|    | -1   | 0.38  | 0.14 | 0.14    | 0.16 | 0.21 |
|    | -1   | -1    | -1   | -1      | -1   | -1   |
|    | 0.03 | 0.03  | 0.01 | 0.01    | 0.02 | 0.02 |
|    | 0.01 | 0.01  | 0.01 | 0.01    | 0.01 | 0.01 |
|    | -1   | -1    | -1   | -1      | -1   | -1   |
|    | -1   | -1    | -1   | -1      | -1   | -1   |
|    | 0.04 | 0.03  | 0.04 | 0.02    | 0.04 | 0.03 |
|    | 0.97 | 0.98  | 0.97 | 0.98    | 0.94 | 0.96 |
|    | -1   | -1    | -1   | -1      | -1   | -1   |
|    | 0.22 | 0.23  | 0.19 | 0.17    | 0.23 | 0.24 |
|    | -1   | 0.09  | -1   | -1      | -1   | -1   |
|    | 0.11 | 0.09  | 0.05 | 0.08    | 0.13 | 0.1  |
|    | 0.05 | 0.04  | 0.02 | 0.02    | 0.03 | 0.04 |
|    | 0.24 | 0.28  | 0.28 | 0.25    | 0.26 | 0.26 |
|    | -1   | -1    | -1   | -1      | -1   | -1   |
|    | -1   | -1    | -1   | -1      | -1   | -1   |

|       |       |      |       |      |      |
|-------|-------|------|-------|------|------|
| 0.93  | 0.94  | 0.99 | 0.99  | 0.97 | 0.98 |
| -1    | -1    | 0.51 | -1    | -1   | -1   |
| 0.94  | 0.92  | 0.92 | 0.81  | -1   | 0.76 |
| -1    | -1    | -1   | -1    | -1   | -1   |
| 0.09  | 0.05  | 0.03 | 0.03  | 0.04 | 0.04 |
| -1    | -1    | -1   | -1    | -1   | -1   |
| -1    | -1    | -1   | -1    | -1   | -1   |
| 0.77  | 0.84  | 0.85 | 0.94  | 0.72 | 0.92 |
| 0.19  | 0.19  | 0.15 | 0.14  | 0.2  | 0.32 |
| 0.15  | 0.1   | 0.12 | 0.11  | 0.09 | 0.12 |
| -1    | -1    | -1   | -1    | 0.04 | -1   |
| 0.98  | 0.98  | 0.98 | 0.98  | 0.97 | 0.98 |
| -1    | -1    | -1   | -1    | -1   | -1   |
| -1 NA |       | -1   | -1 NA | NA   |      |
| -1    | -1    | -1   | -1    | -1   | -1   |
| -1    | 0.89  | -1   | 0.87  | -1   | 0.89 |
| 0.94  | 0.95  | 0.93 | 0.94  | 0.92 | -1   |
| 0.06  | 0.04  | 0.05 | 0.06  | 0.05 | 0.1  |
| 0.01  | 0.01  | 0.01 | 0.01  | 0.01 | 0.01 |
| 0.03  | 0.03  | 0.02 | 0.02  | 0.04 | 0.04 |
| 0.06  | 0.05  | 0.1  | 0.1   | 0.1  | 0.11 |
| 0.14  | 0.11  | 0.08 | 0.09  | 0.11 | 0.11 |
| 0.13  | 0.1   | 0.08 | 0.09  | 0.09 | 0.09 |
| -1    | -1    | -1   | -1 NA | NA   |      |
| 0.49  | 0.3   | 0.18 | 0.18  | 0.22 | 0.25 |
| 0.08  | 0.13  | 0.17 | 0.15  | 0.1  | 0.13 |
| -1    | -1    | -1   | -1    | -1   | -1   |
| 0.96  | 0.97  | 0.97 | 0.97  | 0.95 | 0.97 |
| 0.97  | 0.97  | 0.96 | 0.99  | 0.98 | 0.98 |
| 0.05  | 0.05  | 0.03 | 0.04  | 0.04 | 0.04 |
| 0.13  | 0.07  | 0.23 | 0.18  | 0.23 | 0.26 |
| -1    | 0.23  | -1   | -1    | -1   | -1   |
| 0.02  | 0.03  | -1   | 0.02  | 0.04 | 0.04 |
| 0.19  | 0.1   | 0.1  | 0.1   | 0.13 | 0.15 |
| 0.05  | 0.04  | -1   | -1    | -1   | -1   |
| -1    | -1    | 0.93 | 0.95  | -1   | 0.9  |
| 0.09  | 0.08  | 0.09 | 0.08  | 0.09 | 0.1  |
| 0.99  | 0.99  | 0.99 | 0.99  | 0.99 | 0.99 |
| -1    | -1    | -1   | -1    | -1   | 0.23 |
| 0.95  | 0.97  | 0.97 | 0.94  | 0.96 | 0.94 |
| -1    | -1 NA |      | -1    | -1   | -1   |
| -1    | -1    | -1   | -1    | 0.11 | 0.12 |
| -1    | -1    | -1   | -1    | -1   | -1   |
| -1    | -1    | -1   | 0.92  | -1   | -1   |

| urea2 | juice1 | juice2 | benomy1 | benomy2 | cRed1 |    |
|-------|--------|--------|---------|---------|-------|----|
| 0.02  | 0.02   | 0.04   | 0.04    | 0.03    | 0.03  |    |
| 0.1   | 0.07   | 0.07   | 0.04    | 0.1     | 0.08  |    |
| 0.54  | 0.41   | 0.47   | 0.58    | 0.64    | -1    |    |
| -1    | -1     | -1     | -1      | -1      | -1    |    |
| 0.1   | 0.09   | 0.09   | 0.08    | 0.17    | 0.16  |    |
| -1    | -1     | -1     | -1      | -1      | -1    | NA |
| 0.08  | 0.1    | 0.12   | 0.14    | 0.15    | 0.08  |    |
| 0.03  | 0.04   | 0.05   | 0.04    | 0.07    | 0.07  |    |
| 0.03  | 0.03   | 0.05   | 0.05    | 0.04    | 0.04  |    |
| -1    | 0.91   | 0.94   | 0.93    | -1      | -1    |    |
| -1    | -1     | -1     | -1      | -1      | -1    |    |
| -1    | -1     | -1     | 0.42    | -1      | -1    |    |
| -1    | -1     | -1     | -1      | -1      | -1    |    |
| 0.02  | 0.02   | 0.03   | 0.02    | 0.04    | 0.03  |    |
| 0.03  | 0.03   | 0.02   | 0.02    | 0.05    | 0.04  |    |
| -1    | -1     | 0.18   | 0.14    | -1      | -1    |    |
| 0.01  | 0.01   | 0.03   | 0.02    | 0.02    | 0.02  |    |
| 0.9   | 0.92   | 0.86   | 0.82    | 0.92    | 0.93  |    |
| -1    | 0.01   | -1     | -1      | 0.01    | -1    |    |
| -1    | -1     | -1     | -1      | -1      | -1    |    |
| 0.01  | 0.01   | 0      | 0.01    | 0.01    | 0.01  |    |
| -1    | -1     | -1     | -1      | -1      | -1    |    |
| 0.18  | 0.18   | 0.15   | 0.14    | 0.26    | 0.27  |    |
| -1    | 0.52   | 0.64   | 0.62    | 0.93    | 0.85  |    |
| -1    | -1     | -1     | -1      | -1      | -1    |    |
| -1    | -1     | -1     | -1      | -1      | -1    |    |
| 0.08  | 0.05   | 0.07   | 0.04    | 0.13    | 0.12  |    |
| -1    | -1     | -1     | 0.89    | 0.88    | -1    |    |
| 0.06  | 0.07   | 0.05   | 0.03    | 0.07    | 0.07  |    |
| 0.02  | 0.01   | 0.02   | 0.02    | 0.02    | 0.02  |    |
| 0.04  | 0.06   | 0.05   | 0.06    | 0.07    | 0.05  |    |
| -1    | 0.91   | -1     | 0.57    | 0.91    | -1    |    |
| -1    | -1     | -1     | -1      | -1      | -1    |    |
| 0.02  | 0.01   | -1     | 0.02    | 0.03    | 0.02  |    |
| NA    | -1     | NA     | NA      | -1      | NA    |    |
| 0.01  | 0.01   | 0.01   | 0.01    | 0.01    | 0.01  |    |
| -1    | -1     | -1     | -1      | -1      | -1    |    |
| -1    | -1     | -1     | -1      | -1      | -1    |    |
| 0.2   | 0.26   | 0.14   | 0.16    | 0.25    | 0.33  |    |
| -1    | -1     | -1     | 0.83    | -1      | -1    |    |
| 0.03  | 0.05   | 0.04   | 0.05    | 0.07    | 0.06  |    |
| -1    | -1     | -1     | -1      | -1      | -1    |    |
| 0.34  | 0.28   | 0.52   | 0.35    | 0.48    | 0.42  |    |
| -1    | -1     | -1     | -1      | -1      | -1    |    |
| 0.96  | 0.97   | 0.96   | 0.99    | 0.95    | 0.95  |    |
| -1    | 0.02   | 0.04   | 0.05    | 0.03    | 0.03  |    |
| -1    | -1     | -1     | -1      | -1      | -1    |    |



|      |      |      |      |      |      |
|------|------|------|------|------|------|
| 0.03 | 0.02 | 0.03 | 0.03 | 0.05 | 0.06 |
| 0.03 | 0.02 | 0.03 | 0.02 | 0.03 | 0.02 |
| -1   | -1   | 0.11 | 0.08 | 0.15 | -1   |
| -1   | -1   | -1   | 0.2  | -1   | -1   |
| 0.01 | 0.01 | 0.01 | 0.01 | 0.02 | 0.02 |
| 0.04 | 0.04 | 0.07 | 0.03 | 0.05 | 0.05 |
| -1   | -1   | 0.44 | 0.51 | 0.52 | -1   |
| -1   | -1   | -1   | -1   | -1   | -1   |
| 0.02 | 0.03 | 0.04 | 0.03 | 0.02 | 0.02 |
| 0.02 | 0.02 | 0.01 | 0.01 | 0.03 | 0.02 |
| -1   | -1   | -1   | -1   | -1   | -1   |
| -1   | -1   | -1   | 0.14 | -1   | -1   |
| -1   | -1   | -1   | 0.09 | -1   | -1   |
| 0.06 | 0.05 | 0.08 | 0.07 | 0.07 | 0.05 |
| 0.02 | 0.02 | 0.01 | 0.01 | 0.02 | 0.02 |
| -1   | -1   | 0.88 | 0.9  | -1   | -1   |
| 0.28 | 0.27 | 0.25 | 0.26 | 0.27 | 0.28 |
| 0.06 | 0.06 | 0.07 | 0.07 | 0.06 | 0.05 |
| -1   | -1   | -1   | 0.68 | -1   | -1   |
| -1   | -1   | -1   | -1   | -1   | -1   |
| 0.51 | 0.5  | 0.98 | 0.97 | 0.57 | 0.53 |
| 0.04 | 0.04 | 0.04 | 0.04 | 0.05 | 0.04 |
| -1   | 0.22 | -1   | 0.06 | 0.16 | 0.21 |
| -1   | -1   | -1   | -1   | -1   | -1   |
| -1   | 0.85 | 0.87 | 0.96 | 0.85 | 0.91 |
| 0.02 | 0.03 | 0.04 | 0.03 | 0.03 | 0.03 |
| -1   | -1   | -1   | -1   | -1   | -1   |
| -1   | -1   | -1   | -1   | -1   | -1   |
| 0.02 | 0.02 | 0.03 | 0.03 | 0.03 | 0.02 |
| 1    | 1    | 1    | 1    | 1    | 1    |
| -1   | 0.14 | 0.07 | 0.14 | 0.07 | -1   |
| 0.02 | 0.02 | 0.02 | 0.02 | 0.03 | 0.03 |
| -1   | -1   | -1   | 0.08 | -1   | -1   |
| 0.97 | 0.99 | 0.99 | 0.99 | 0.99 | 0.95 |
| 0.02 | 0.02 | 0.02 | 0.01 | 0.03 | 0.03 |
| -1   | -1   | 0.31 | 0.27 | -1   | -1   |
| 0.05 | 0.05 | 0.06 | 0.05 | 0.07 | 0.06 |
| -1   | -1   | -1   | -1   | -1   | -1   |
| -1   | -1   | -1   | 0.43 | -1   | -1   |
| -1   | -1   | 0.03 | 0.03 | -1   | -1   |
| -1   | 0.86 | -1   | 0.83 | -1   | -1   |
| -1   | -1   | -1   | -1   | -1   | -1   |
| -1   | -1   | -1   | -1   | -1   | -1   |
| -1   | -1   | -1   | -1   | -1   | -1   |
| 0.09 | 0.07 | 0.04 | 0.04 | 0.08 | 0.08 |
| 0.02 | 0.02 | 0.01 | 0.01 | 0.03 | 0.03 |
| -1   | 0.23 | 0.58 | 0.5  | 0.28 | 0.17 |
| -1   | -1   | -1   | -1   | -1   | -1   |
| -1   | -1   | -1   | -1   | -1   | -1   |

|    |      |      |      |      |       |      |
|----|------|------|------|------|-------|------|
|    | -1   | -1   | 0.1  | -1   | -1    | -1   |
|    | -1   | 0.04 | 0.04 | 0.03 | 0.11  | 0.12 |
|    | -1   | -1   | -1   | 0.82 | -1    | -1   |
|    | -1   | 0.33 | 0.35 | 0.52 | 0.44  | -1   |
|    | 0.05 | 0.05 | 0.06 | 0.03 | 0.08  | 0.09 |
|    | -1   | -1   | -1   | -1   | -1    | -1   |
|    | 0.07 | 0.07 | 0.03 | 0.02 | 0.08  | 0.07 |
|    | 0.01 | 0.01 | 0.01 | 0.01 | 0.01  | 0.01 |
|    | 0.02 | 0.02 | 0.02 | 0.01 | 0.03  | 0.03 |
|    | -1   | -1   | -1   | -1   | -1    | -1   |
|    | 0.02 | -1   | 0.07 | 0.06 | 0.03  | 0.05 |
|    | 0.4  | 0.31 | 0.12 | 0.1  | 0.47  | 0.47 |
|    | 0.02 | 0.02 | 0.02 | 0.01 | 0.03  | 0.03 |
|    | -1   | 0.26 | 0.32 | 0.37 | 0.24  | -1   |
|    | 0.07 | 0.07 | 0.05 | 0.04 | 0.08  | 0.1  |
|    | 1    | 1    | 1    | 1    | 1     | 1    |
|    | 0.15 | 0.18 | 0.45 | 0.31 | 0.22  | 0.2  |
|    | 0.95 | 0.97 | 0.96 | 0.98 | 0.92  | 0.97 |
|    | -1   | -1   | -1   | -1   | -1    | -1   |
|    | -1   | 0.94 | 0.92 | 0.95 | 0.76  | -1   |
|    | -1   | -1   | -1   | 0.01 | -1    | -1   |
|    | 0.94 | 0.94 | 0.97 | 1    | 1     | 1    |
|    | -1   | -1   | -1   | -1   | -1 NA |      |
|    | -1   | -1   | -1   | -1   | -1    | -1   |
|    | 0.03 | 0.03 | 0.03 | 0.02 | 0.04  | 0.03 |
|    | -1   | -1   | -1   | -1   | -1    | -1   |
|    | 0.04 | 0.05 | 0.03 | 0.02 | 0.05  | 0.05 |
|    | 0.03 | 0.04 | 0.03 | 0.03 | 0.05  | 0.04 |
|    | 0.08 | 0.1  | 0.1  | 0.12 | 0.09  | 0.09 |
|    | 0.02 | 0.02 | -1   | 0.03 | 0.03  | 0.02 |
| NA |      | -1   | 0.93 | 0.97 | -1    | -1   |
|    | 0.03 | 0.03 | 0.03 | 0.02 | 0.07  | 0.05 |
|    | -1   | -1   | -1   | -1   | -1    | -1   |
|    | 0.14 | 0.13 | 0.13 | 0.08 | 0.17  | 0.15 |
|    | -1   | -1   | -1   | -1   | -1    | -1   |
|    | 0.01 | 0    | 0.01 | 0.01 | 0.01  | 0.01 |
|    | 0.01 | 0.01 | 0.01 | 0    | 0.01  | 0.01 |
|    | -1   | -1   | 0.59 | 0.52 | 0.21  | -1   |
|    | -1   | -1   | -1   | -1   | -1    | -1   |
|    | 0.03 | 0.03 | 0.04 | 0.04 | 0.04  | 0.03 |
|    | 0.97 | 0.94 | 0.98 | 0.99 | 0.97  | 0.96 |
|    | -1   | -1   | -1   | -1   | 0.68  | -1   |
|    | 0.14 | 0.11 | 0.17 | 0.11 | 0.2   | 0.2  |
|    | -1   | -1   | 0.18 | 0.14 | -1    | -1   |
|    | 0.05 | 0.1  | 0.15 | 0.12 | 0.08  | 0.06 |
|    | 0.02 | 0.02 | 0.02 | 0.02 | 0.03  | 0.03 |
|    | 0.22 | 0.15 | 0.16 | 0.1  | 0.14  | 0.16 |
|    | -1   | -1   | -1   | -1   | -1    | -1   |
|    | -1   | -1   | 0.86 | 0.89 | -1    | -1   |

|    |      |      |      |       |       |      |
|----|------|------|------|-------|-------|------|
|    | 0.97 | 0.98 | 0.94 | 0.97  | 0.98  | 0.96 |
|    | -1   | -1   | 0.2  | 0.24  | 0.28  | -1   |
|    | 0.85 | 0.64 | 0.93 | 0.92  | 0.85  | 0.76 |
|    | -1   | -1   | -1   | -1    | -1    | -1   |
|    | 0.05 | 0.02 | 0.08 | 0.06  | 0.02  | 0.02 |
|    | -1   | -1   | -1   | -1    | -1    | -1   |
|    | -1   | -1   | -1   | -1    | -1    | -1   |
|    | 0.86 | 0.85 | 0.88 | 0.93  | 0.93  | 0.89 |
|    | 0.16 | 0.18 | 0.23 | 0.35  | 0.19  | 0.19 |
|    | 0.07 | 0.09 | 0.13 | 0.12  | 0.09  | 0.09 |
|    | -1   | -1   | 0.08 | 0.07  | 0.04  | 0.05 |
|    | 0.97 | 0.98 | 0.99 | 0.99  | 0.98  | 0.98 |
|    | -1   | -1   | -1   | -1    | -1    | -1   |
| NA | NA   |      | 0.94 | -1 NA | NA    |      |
|    | -1   | -1   | -1   | -1    | -1    | -1   |
|    | -1   | 0.9  | 0.92 | 0.88  | -1    | -1   |
|    | 0.92 | -1   | 0.98 | 0.98  | 0.91  | -1   |
|    | 0.05 | 0.05 | 0.03 | 0.02  | 0.06  | 0.06 |
|    | 0.01 | 0.01 | 0.02 | 0.01  | 0.01  | 0.01 |
|    | 0.02 | 0.02 | 0.02 | 0.01  | 0.03  | 0.03 |
|    | 0.1  | 0.07 | 0.05 | 0.03  | 0.08  | 0.08 |
|    | 0.09 | 0.11 | 0.13 | 0.13  | 0.12  | 0.1  |
|    | 0.09 | 0.09 | 0.11 | 0.09  | 0.11  | 0.1  |
| NA |      | -1   | -1   | -1    | -1 NA |      |
|    | 0.11 | 0.13 | 0.93 | 0.95  | 0.26  | 0.33 |
|    | 0.11 | 0.08 | 0.05 | 0.04  | 0.08  | 0.07 |
|    | -1   | -1   | -1   | -1    | -1    | -1   |
|    | 0.95 | 0.96 | 0.98 | 0.98  | 0.96  | 0.94 |
|    | 0.97 | 0.98 | 0.99 | 0.99  | 0.99  | 0.98 |
|    | 0.03 | 0.02 | 0.02 | 0.01  | 0.02  | 0.02 |
|    | 0.21 | 0.27 | 0.38 | 0.55  | 0.3   | 0.32 |
|    | -1   | -1   | -1   | -1    | -1 NA |      |
|    | 0.02 | 0.01 | 0.01 | 0.01  | 0.03  | 0.02 |
|    | 0.09 | 0.11 | 0.16 | 0.19  | 0.16  | 0.14 |
|    | -1   | -1   | 0.04 | 0.08  | -1    | -1   |
|    | -1   | -1   | -1   | 0.41  | 0.87  | 0.87 |
|    | 0.06 | 0.07 | 0.07 | 0.05  | 0.1   | 0.09 |
|    | 0.98 | 0.99 | 0.99 | 0.99  | 0.99  | 0.99 |
|    | -1   | -1   | 0.07 | -1    | -1    | -1   |
|    | 0.93 | 0.95 | 0.95 | 0.96  | 0.95  | -1   |
|    | -1   | -1   | -1   | -1    | -1 NA |      |
|    | -1   | 0.07 | 0.09 | 0.1   | 0.09  | -1   |
|    | -1   | -1   | -1   | -1    | -1    | -1   |
|    | -1   | -1   | 0.93 | 0.95  | -1    | -1   |

cRed2

|       |      |
|-------|------|
| 0.03  | 0.02 |
| 0.18  | 0.08 |
| 0.48  | 0.49 |
| -1    | -1   |
| 0.11  | 0.14 |
| -1 NA |      |
| 0.13  | 0.13 |
| 0.05  | 0.05 |
| 0.04  | 0.04 |
| 0.92  | -1   |
| -1    | -1   |
| -1    | -1   |
| -1    | -1   |
| 0.03  | 0.03 |
| 0.03  | 0.03 |
| -1    | -1   |
| 0.02  | 0.02 |
| 0.89  | 0.94 |
| 0.01  | 0.01 |
| -1    | -1   |
| 0.01  | 0.01 |
| -1    | -1   |
| 0.21  | 0.22 |
| 0.79  | 0.77 |
| -1    | -1   |
| -1    | -1   |
| 0.1   | 0.1  |
| -1    | -1   |
| 0.06  | 0.07 |
| 0.01  | 0.02 |
| 0.05  | 0.06 |
| 0.88  | -1   |
| -1    | -1   |
| 0.03  | 0.02 |
| -1    | -1   |
| 0.01  | 0.01 |
| -1    | -1   |
| -1    | -1   |
| 0.29  | 0.27 |
| -1    | -1   |
| 0.05  | 0.06 |
| -1    | -1   |
| 0.28  | 0.36 |
| -1    | -1   |
| 0.97  | 0.95 |
| 0.04  | 0.03 |
| -1    | -1   |

|      |      |
|------|------|
| 0.04 | 0.05 |
| 0.02 | 0.02 |
| 0.22 | -1   |
| -1   | -1   |
| 0.02 | 0.01 |
| 0.05 | 0.05 |
| 0.75 | 0.49 |
| -1   | -1   |
| 0.02 | 0.02 |
| 0.03 | 0.02 |
| -1   | -1   |
| 0.22 | -1   |
| -1   | -1   |
| 0.06 | 0.06 |
| 0.02 | 0.02 |
| 0.79 | -1   |
| 0.24 | 0.22 |
| 0.07 | 0.06 |
| -1   | -1   |
| -1   | -1   |
| 0.68 | 0.66 |
| 0.04 | 0.04 |
| 0.14 | -1   |
| -1   | -1   |
| 0.91 | 0.82 |
| 0.03 | 0.03 |
| -1   | -1   |
| -1   | -1   |
| 0.02 | 0.03 |
| 1    | 1    |
| 0.25 | 0.1  |
| 0.03 | 0.03 |
| 0.22 | -1   |
| 0.98 | 0.98 |
| 0.02 | 0.03 |
| -1   | -1   |
| 0.06 | 0.06 |
| -1   | -1   |
| -1   | -1   |
| 0.03 | -1   |
| -1   | -1   |
| -1   | -1   |
| -1   | -1   |
| -1   | -1   |
| 0.07 | 0.09 |
| 0.02 | 0.02 |
| 0.3  | 0.2  |
| -1   | -1   |
| -1   | -1   |

|      |      |
|------|------|
| -1   | -1   |
| 0.12 | 0.06 |
| -1   | -1   |
| 0.28 | 0.37 |
| 0.08 | 0.07 |
| -1   | -1   |
| 0.04 | 0.05 |
| 0.01 | 0.01 |
| 0.02 | 0.02 |
| -1   | -1   |
| 0.02 | 0.03 |
| 0.46 | 0.39 |
| 0.03 | 0.03 |
| 0.31 | 0.31 |
| 0.06 | 0.06 |
| 1    | 1    |
| 0.17 | 0.22 |
| 0.95 | 0.98 |
| -1   | -1   |
| 0.85 | 0.87 |
| -1   | -1   |
| 1    | 1    |
| -1   | -1   |
| -1   | -1   |
| 0.04 | 0.04 |
| -1   | -1   |
| 0.05 | 0.05 |
| 0.04 | 0.05 |
| 0.11 | 0.1  |
| 0.02 | 0.02 |
| -1   | -1   |
| 0.04 | 0.04 |
| -1   | -1   |
| 0.12 | 0.15 |
| -1   | -1   |
| 0.01 | 0.01 |
| 0.01 | 0.01 |
| -1   | -1   |
| -1   | -1   |
| 0.03 | 0.03 |
| 0.98 | 0.98 |
| -1   | -1   |
| 0.12 | 0.16 |
| -1   | -1   |
| 0.09 | 0.08 |
| 0.03 | 0.02 |
| 0.13 | 0.17 |
| -1   | -1   |
| 0.83 | -1   |

|    |       |      |
|----|-------|------|
|    | 0.97  | 0.97 |
|    | 0.17  | -1   |
|    | 0.88  | 0.64 |
|    | -1    | -1   |
|    | 0.04  | 0.04 |
|    | -1    | -1   |
|    | -1    | -1   |
|    | 0.87  | 0.9  |
|    | 0.15  | 0.23 |
|    | 0.09  | 0.08 |
|    | 0.08  | 0.05 |
|    | 0.98  | 0.98 |
|    | -1    | -1   |
| NA | NA    |      |
|    | -1    | -1   |
|    | 0.86  | -1   |
|    | 0.92  | -1   |
|    | 0.05  | 0.04 |
|    | 0.01  | 0.01 |
|    | 0.02  | 0.02 |
|    | 0.07  | 0.09 |
|    | 0.1   | 0.11 |
|    | 0.09  | 0.09 |
| NA | NA    |      |
|    | 0.33  | 0.25 |
|    | 0.07  | 0.07 |
|    | -1    | -1   |
|    | 0.98  | 0.96 |
|    | 0.98  | 0.98 |
|    | 0.02  | 0.02 |
|    | 0.22  | 0.18 |
|    | -1    | -1   |
|    | 0.02  | 0.02 |
|    | 0.18  | 0.14 |
|    | 0.12  | -1   |
|    | 0.89  | 0.88 |
|    | 0.07  | 0.08 |
|    | 0.99  | 0.99 |
|    | -1    | -1   |
|    | 0.92  | 0.93 |
|    | -1 NA |      |
|    | 0.05  | -1   |
|    | 0.14  | -1   |
|    | -1    | -1   |

**Table S8. Figure 6A event annotations**  
**Splicing events**

|                                                 | <b>Annotation (1=Yes,0=No)</b> |
|-------------------------------------------------|--------------------------------|
| chrXII:982539:982739:-@chrXII:982258:982458:-   | 0                              |
| chrXVI:717147:717347:-@chrXVI:716849:717049:-   | 0                              |
| chrXVI:883187:883387:+@chrXVI:883487:883687:+   | 1                              |
| chrXIV:414711:414911:+@chrXIV:415914:416114:+   | 1                              |
| chrVII:365433:365633:-@chrVII:364764:364964:-   | 1                              |
| chrX:387436:387636:-@chrX:387148:387348:-       | 1                              |
| chrIX:127461:127661:+@chrIX:128149:128349:+     | 1                              |
| chrII:45444:45644:+@chrII:45978:46178:+         | 1                              |
| chrVII:438398:438598:-@chrVII:437741:437941:-   | 1                              |
| chrIX:232367:232567:-@chrIX:231757:231957:-     | 1                              |
| chrXVI:623377:623577:+@chrXVI:623711:623911:+   | 1                              |
| chrXII:766130:766330:-@chrXII:765873:766073:-   | 1                              |
| chrIV:117466:117666:+@chrIV:118158:118358:+     | 1                              |
| chrIV:569724:569924:-@chrIV:569433:569633:-     | 1                              |
| chrV:306125:306325:+@chrV:306792:306992:+       | 1                              |
| chrXVI:218446:218646:+@chrXVI:218747:218947:+   | 1                              |
| chrXIV:350757:350957:+@chrXIV:351054:351254:+   | 1                              |
| chrVI:64921:65121:-@chrVI:64153:64353:-         | 0                              |
| chrIV:417627:417827:-@chrIV:417021:417221:-     | 0                              |
| chrXVI:345597:345797:-@chrXVI:345244:345444:-   | 1                              |
| chrXII:286557:286757:-@chrXII:286267:286467:-   | 1                              |
| chrXI:166199:166399:+@chrXI:166488:166688:+     | 1                              |
| chrXVI:833493:833693:+@chrXVI:833828:834028:+   | 1                              |
| chrII:407123:407323:-@chrII:406827:407027:-     | 1                              |
| chrXIII:236391:236591:+@chrXIII:236954:237154:+ | 1                              |
| chrVII:543438:543638:+@chrVII:543722:543922:+   | 1                              |
| chrXII:233886:234086:-@chrXII:233442:233642:-   | 0                              |
| chrVIII:382748:382948:-@chrVIII:382106:382306:- | 1                              |
| chrXIII:223782:223982:-@chrXIII:223180:223380:- | 1                              |
| chrIV:229819:230019:+@chrIV:230321:230521:+     | 1                              |
| chrXII:694182:694382:+@chrXII:694473:694673:+   | 1                              |
| chrIV:491359:491559:+@chrIV:491899:492099:+     | 1                              |
| chrII:680040:680240:-@chrII:679742:679942:-     | 1                              |
| chrXIII:225691:225891:+@chrXIII:226290:226490:+ | 1                              |
| chrXIII:721346:721546:-@chrXIII:720998:721198:- | 1                              |
| chrXII:40401:40601:-@chrXII:40021:40221:-       | 1                              |
| chrXVI:911076:911276:+@chrXVI:911353:911553:+   | 1                              |
| chrX:172753:172953:-@chrX:172232:172432:-       | 1                              |
| chrIX:99386:99586:-@chrIX:98895:99095:-         | 1                              |
| chrIX:257027:257227:-@chrIX:256354:256554:-     | 1                              |
| chrII:462229:462429:+@chrII:462500:462700:+     | 1                              |
| chrX:157250:157450:-@chrX:156589:156789:-       | 1                              |
| chrX:608282:608482:+@chrX:608582:608782:+       | 0                              |
| chrXII:796336:796536:-@chrXII:795712:795912:-   | 1                              |
| chrVIII:107631:107831:+@chrVIII:107895:108095:+ | 1                              |
| chrX:396571:396771:-@chrX:396293:396493:-       | 1                              |
| chrXVI:653967:654167:+@chrXVI:654571:654771:+   | 1                              |



|                                                 |   |
|-------------------------------------------------|---|
| chrXIV:545091:545291:+@chrXIV:545371:545571:+   | 1 |
| chrV:432471:432671:+@chrV:433197:433397:+       | 1 |
| chrII:342498:342698:+@chrII:342790:342990:+     | 0 |
| chrVIII:354664:354864:+@chrVIII:354956:355156:+ | 1 |
| chrVIII:103857:104057:-@chrVIII:103417:103617:- | 0 |
| chrVII:383285:383485:+@chrVII:383581:383781:+   | 0 |
| chrXIV:273602:273802:-@chrXIV:272187:272387:-   | 0 |
| chrXV:80160:80360:+@chrXV:80775:80975:+         | 1 |
| chrI:87187:87387:+@chrI:87501:87701:+           | 1 |
| chrIII:111634:111834:-@chrIII:111357:111557:-   | 1 |
| chrXIV:728354:728554:+@chrXIV:728922:729122:+   | 0 |
| chrIV:458098:458298:-@chrIV:457817:458017:-     | 1 |
| chrVII:436112:436312:+@chrVII:436375:436575:+   | 0 |
| chrXV:349599:349799:-@chrXV:349297:349497:-     | 0 |
| chrXIII:559582:559782:+@chrXIII:560158:560358:+ | 0 |
| chrXII:931699:931899:-@chrXII:931149:931349:-   | 1 |
| chrVIII:250955:251155:+@chrVIII:251249:251449:+ | 1 |
| chrIV:1103609:1103809:+@chrIV:1103893:1104093:+ | 1 |
| chrXV:552875:553075:-@chrXV:552465:552665:-     | 1 |
| chrVII:726838:727038:+@chrVII:727358:727558:+   | 1 |
| chrXIII:754220:754420:-@chrXIII:753542:753742:- | 1 |
| chrXVI:582702:582902:-@chrXVI:582358:582558:-   | 1 |
| chrV:396610:396810:+@chrV:397282:397482:+       | 1 |
| chrIV:579278:579478:+@chrIV:580018:580218:+     | 1 |
| chrIX:68515:68715:+@chrIX:69150:69350:+         | 1 |
| chrV:307756:307956:+@chrV:308068:308268:+       | 1 |
| chrXII:713156:713356:-@chrXII:712525:712725:-   | 1 |
| chrVIII:129328:129528:+@chrVIII:129648:129848:+ | 1 |
| chrVII:249686:249886:+@chrVII:250087:250287:+   | 1 |
| chrVIII:104205:104405:+@chrVIII:104804:105004:+ | 1 |
| chrVII:439181:439381:+@chrVII:439480:439680:+   | 0 |
| chrVI:63974:64174:-@chrVI:63659:63859:-         | 1 |
| chrXI:431834:432034:+@chrXI:432433:432633:+     | 1 |
| chrXIII:124158:124358:-@chrXIII:123542:123742:- | 1 |
| chrXIII:140184:140384:-@chrXIII:139890:140090:- | 1 |
| chrIII:178214:178414:-@chrIII:177706:177906:-   | 1 |
| chrXVI:115018:115218:+@chrXVI:115294:115494:+   | 1 |
| chrIV:217402:217602:+@chrIV:218008:218208:+     | 1 |
| chrIV:1319817:1320017:-@chrIV:1319520:1319720:- | 1 |
| chrIV:322082:322282:+@chrIV:322704:322904:+     | 1 |
| chrVII:148967:149167:-@chrVII:148398:148598:-   | 1 |
| chrXIII:163717:163917:-@chrXIII:163108:163308:- | 1 |
| chrVII:150526:150726:-@chrVII:149983:150183:-   | 1 |
| chrIV:1236642:1236842:+@chrIV:1237609:1237809:+ | 1 |
| chrIX:47498:47698:+@chrIX:47761:47961:+         | 1 |
| chrXIII:854616:854816:+@chrXIII:854899:855099:+ | 1 |
| chrXIII:500152:500352:-@chrXIII:499678:499878:- | 1 |
| chrXIV:615866:616066:+@chrXIV:616413:616613:+   | 0 |
| chrV:348277:348477:-@chrV:348001:348201:-       | 1 |

|                                                   |   |
|---------------------------------------------------|---|
| chrXVI:404756:404956:+@chrXVI:405458:405658:+     | 1 |
| chrXVI:378390:378590:-@chrXVI:377795:377995:-     | 1 |
| chrXVI:305106:305306:+@chrXVI:305412:305612:+     | 1 |
| chrXIV:48093:48293:+@chrXIV:48402:48602:+         | 1 |
| chrXIII:650960:651160:+@chrXIII:651624:651824:+   | 1 |
| chrV:166875:167075:-@chrV:166571:166771:-         | 1 |
| chrII:89441:89641:-@chrII:88932:89132:-           | 1 |
| chrXII:28835:29035:-@chrXII:28262:28462:-         | 0 |
| chrXII:281629:281829:-@chrXII:281227:281427:-     | 0 |
| chrII:124954:125154:+@chrII:125271:125471:+       | 1 |
| chrXV:92831:93031:-@chrXV:92240:92440:-           | 1 |
| chrIV:1212677:1212877:+@chrIV:1212979:1213179:+   | 1 |
| chrXVI:96234:96434:-@chrXVI:95953:96153:-         | 1 |
| chrXII:263005:263205:+@chrXII:263595:263795:+     | 1 |
| chrXIV:722303:722503:-@chrXIV:721570:721770:-     | 1 |
| chrII:592769:592969:-@chrII:592216:592416:-       | 1 |
| chrVII:253249:253449:-@chrVII:252985:253185:-     | 0 |
| chrX:90894:91094:+@chrX:91412:91612:+             | 1 |
| chrXIII:558002:558202:-@chrXIII:557628:557828:-   | 0 |
| chrVIII:126351:126551:+@chrVIII:127113:127313:+   | 1 |
| chrXII:819130:819330:+@chrXII:819778:819978:+     | 1 |
| chrXV:423735:423935:-@chrXV:423457:423657:-       | 0 |
| chrIV:267525:267725:+@chrIV:267807:268007:+       | 1 |
| chrXII:466255:466455:-@chrXII:456916:457116:-     | 0 |
| chrIV:314337:314537:-@chrIV:313844:314044:-       | 1 |
| chrX:365584:365784:+@chrX:365903:366103:+         | 1 |
| chrXV:241026:241226:-@chrXV:240747:240947:-       | 1 |
| chrIV:1319698:1319898:-@chrIV:1319417:1319617:-   | 1 |
| chrI:142053:142253:+@chrI:142620:142820:+         | 1 |
| chrIV:1450847:1451047:-@chrIV:1450257:1450457:-   | 1 |
| chrII:332675:332875:+@chrII:333387:333587:+       | 1 |
| chrVI:223772:223972:-@chrVI:223240:223440:-       | 1 |
| chrVIII:187677:187877:-@chrVIII:187314:187514:-   | 1 |
| chrX:703055:703255:-@chrX:702598:702798:-         | 1 |
| chrIV:308227:308427:+@chrIV:308793:308993:+       | 1 |
| chrIX:166234:166434:+@chrIX:166520:166720:+       | 1 |
| chrIV:1355551:1355751:-@chrIV:1355036:1355236:-   | 1 |
| chrX:75738:75938:+@chrX:76325:76525:+             | 1 |
| chrII:606080:606280:+@chrII:606669:606869:+       | 1 |
| chrXV:242505:242705:-@chrXV:242241:242441:-       | 1 |
| chrXVI:281940:282140:+@chrXVI:282666:282866:+     | 1 |
| chrX:435027:435227:+@chrX:435344:435544:+         | 1 |
| chrXIII:337617:337817:+@chrXIII:337904:338104:+   | 1 |
| chrXIII:732265:732465:+@chrXIII:732876:733076:+   | 1 |
| chrX:50412:50612:-@chrX:50068:50268:-             | 1 |
| chrXV:94291:94491:-@chrXV:93643:93843:-           | 1 |
| chrXII:1028668:1028868:+@chrXII:1029253:1029453:+ | 1 |
| chrIV:655003:655203:+@chrIV:655273:655473:+       | 0 |
| chrXIV:64451:64651:-@chrXIV:63818:64018:-         | 1 |

|                                                 |   |
|-------------------------------------------------|---|
| chrXII:856374:856574:+@chrXII:857058:857258:+   | 1 |
| chrXIII:205897:206097:+@chrXIII:206204:206404:+ | 1 |
| chrVIII:255751:255951:-@chrVIII:255437:255637:- | 1 |
| chrVI:221415:221615:-@chrVI:221067:221267:-     | 1 |
| chrXV:678791:678991:-@chrXV:678179:678379:-     | 1 |
| chrXI:93466:93666:-@chrXI:93166:93366:-         | 0 |
| chrIV:1406792:1406992:+@chrIV:1407232:1407432:+ | 0 |
| chrXVI:172962:173162:+@chrXVI:173572:173772:+   | 1 |
| chrV:270149:270349:-@chrV:269551:269751:-       | 1 |
| chrIX:348495:348695:-@chrIX:348163:348363:-     | 1 |
| chrV:159088:159288:-@chrV:158794:158994:-       | 1 |
| chrIV:255045:255245:-@chrIV:254774:254974:-     | 1 |
| chrVI:241809:242009:+@chrVI:242082:242282:+     | 1 |
| chrXIII:652848:653048:-@chrXIII:652575:652775:- | 1 |
| chrII:462009:462209:+@chrII:462290:462490:+     | 1 |
| chrXI:430597:430797:-@chrXI:430255:430455:-     | 1 |
| chrII:479145:479345:+@chrII:479435:479635:+     | 1 |
| chrIV:337324:337524:+@chrIV:337635:337835:+     | 1 |
| chrXII:564514:564714:-@chrXII:564254:564454:-   | 1 |
| chrVIII:298485:298685:-@chrVIII:298160:298360:- | 1 |
| chrXIII:99376:99576:-@chrXIII:99059:99259:-     | 1 |
| chrXVI:271103:271303:+@chrXVI:271897:272097:+   | 0 |
| chrII:415260:415460:-@chrII:414553:414753:-     | 1 |
| chrII:47147:47347:-@chrII:46858:47058:-         | 1 |
| chrXIV:622744:622944:+@chrXIV:623287:623487:+   | 1 |
| chrIV:1266862:1267062:-@chrIV:1266569:1266769:- | 1 |
| chrX:649658:649858:-@chrX:649314:649514:-       | 0 |
| chrII:186428:186628:-@chrII:186152:186352:-     | 1 |
| chrVIII:138409:138609:-@chrVIII:138040:138240:- | 1 |
| chrIV:65106:65306:+@chrIV:65378:65578:+         | 1 |
| chrXIII:82090:82290:+@chrXIII:82374:82574:+     | 1 |
| chrXI:282895:283095:+@chrXI:283422:283622:+     | 1 |
| chrXVI:173465:173665:+@chrXVI:174073:174273:+   | 1 |
| chrXVI:673548:673748:+@chrXVI:674377:674577:+   | 0 |
| chrXIII:914649:914849:-@chrXIII:914204:914404:- | 0 |
| chrX:469264:469464:-@chrX:468983:469183:-       | 1 |
| chrV:307546:307746:+@chrV:307849:308049:+       | 1 |
| chrIV:431473:431673:-@chrIV:431186:431386:-     | 1 |
| chrXVI:678280:678480:-@chrXVI:677993:678193:-   | 1 |
| chrXV:373699:373899:+@chrXV:374123:374323:+     | 0 |
| chrXV:901194:901394:-@chrXV:900567:900767:-     | 1 |
| chrXVI:244026:244226:-@chrXVI:243289:243489:-   | 0 |
| chrVI:203387:203587:-@chrVI:203092:203292:-     | 1 |
| chrVII:859474:859674:-@chrVII:859060:859260:-   | 1 |

**Table S9. Figure 6B PSI values**

| event                                       | WT_1_polyA | WT_2_polyA | DBR1_1_polyA |
|---------------------------------------------|------------|------------|--------------|
| chrII:168400:168600:+@chrII:168809:169009:  | 1          | 1          | 1            |
| chrX:50119:50319:-@chrX:50412:50612:-@A39   | 0.99       | 0.99       | 0.99         |
| chrV:396610:396810:+@chrV:397282:397482:-   | 0.06       | 0.05       | 0.08         |
| chrXVI:173465:173665:+@chrXVI:174073:1742   | 0.03       | 0.03       | 0.06         |
| chrIX:256354:256554:-@chrIX:257027:257227   | 0.06       | 0.05       | 0.08         |
| chrII:691766:691966:+@chrII:692126:692334:  | 0.96       | 0.98       | 0.95         |
| chrII:662381:662581:-@chrII:663003:663203:- | 0.99       | 0.98       | 0.98         |
| chrI:12287:12487:+@chrI:12776:12976:+@no    | 0.97       | 0.98       | 0.98         |
| chrXIII:23160:23360:-@chrXIII:23659:23859:- | 0.05       | 0.12       | 0.06         |
| chrXIV:5731:5931:-@chrXIV:6080:6280:-@anno  | 0.74       | 0.57       | 0.61         |
| chrIV:1329546:1329746:+@chrIV:1329837:133   | 1          | 1          | 1            |
| chrVI:109748:109948:-@chrVI:110033:110233   | 0.94       | NA         | 0.92         |
| chrIV:600831:601031:-@chrIV:601140:601340:  | 1          | 1          | 1            |
| chrVII:383285:383485:+@chrVII:383581:38378  | 0.96       | 0.98       | 0.85         |
| chrVII:310815:311015:+@chrVII:311527:31172  | 0.19       | 0.11       | 0.26         |
| chrVIII:558415:558615:+@chrVIII:558715:558  | 0.99       | 0.99       | 0.99         |
| chrIV:601115:601315:+@chrIV:601471:601697   | 1          | 1          | 1            |
| chrXIII:223180:223380:-@chrXIII:223782:2239 | 0.05       | 0.04       | 0.06         |
| chrXV:778659:778859:-@chrXV:779387:779587   | 0.15       | 0.11       | 0.16         |
| chrXIII:123542:123742:-@chrXIII:124158:1243 | 0.08       | 0.05       | 0.07         |
| chrXII:457763:457963:+@chrXII:467102:46744  | 1          | 1          | 1            |
| chrIV:229819:230019:+@chrIV:230321:230521   | 0.08       | 0.07       | 0.1          |
| chrXV:80160:80360:+@chrXV:80775:80975:+@    | 0.05       | 0.04       | 0.08         |
| chrXVI:75785:75985:-@chrXVI:76224:76424:-@  | 0.05       | 0.05       | 0.08         |
| chrII:592216:592416:-@chrII:592769:592969:- | 0.08       | 0.05       | 0.09         |
| chrIV:579278:579478:+@chrIV:580018:580218   | 0.18       | 0.1        | 0.23         |
| chrIV:313844:314044:-@chrIV:314337:314537:  | 0.48       | 0.25       | 0.8          |
| chrXIV:615866:616066:+@chrXIV:616413:6166   | 0.98       | 0.96       | 0.99         |
| chrII:604314:604514:+@chrII:604928:605131:  | 0.14       | 0.19       | 0.15         |
| chrX:90894:91094:+@chrX:91412:91612:+@ar    | 0.06       | 0.05       | 0.07         |
| chrIV:121877:122077:+@chrIV:122168:122402   | 0.87       | 0.81       | 0.89         |
| chrXIII:652575:652775:-@chrXIII:652848:6530 | 0.63       | 0.61       | 0.57         |
| chrVII:497165:497365:-@chrVII:498000:49820  | 1          | 1          | 1            |
| chrXII:786415:786615:+@chrXII:786713:7869:  | 0.83       | 0.96       | 0.85         |
| chrX:608106:608306:+@chrX:608582:608782:-   | 0.07       | 0.03       | 0.11         |
| chrV:4122:4322:-@chrV:4602:4802:-@annote    | 0.97       | 0.98       | 0.97         |
| chrXIV:272187:272387:-@chrXIV:273602:27380  | 0.95       | 1          | 0.98         |
| chrXV:30912:31112:+@chrXV:31215:31415:+@    | 0.97       | 0.99       | 0.98         |
| chrVII:346608:346808:-@chrVII:346894:34709  | 0.14       | 0.17       | NA           |
| chrXV:505737:505937:+@chrXV:506339:50653    | 0.04       | 0.03       | 0.05         |
| chrVIII:126351:126551:+@chrVIII:127113:127  | 0.08       | 0.03       | 0.09         |
| chrXII:456916:457116:-@chrXII:466255:46763  | 0.99       | 0.98       | 0.98         |
| chrIV:569433:569633:-@chrIV:569724:569924:  | 0.47       | 0.48       | 0.39         |
| chrIV:306605:306805:-@chrIV:307766:307966:  | 1          | 1          | 1            |
| chrXI:449751:449951:-@chrXI:450021:450221   | NA         | NA         | 0.9          |
| chrXV:900567:900767:-@chrXV:901194:901394   | 0.09       | 0.07       | 0.15         |
| chrXI:155071:155271:+@chrXI:155655:155855   | 0.56       | 0.72       | 0.79         |

|                                             |      |      |      |
|---------------------------------------------|------|------|------|
| chrIV:60278:60478:-@chrIV:61788:61988:-@nc  | 0.5  | 0.95 | 0.7  |
| chrXII:454063:454263:+@chrXII:463402:46744  | 0.74 | 0.64 | 0.7  |
| chrXVI:406446:406646:+@chrXVI:407068:4072   | 0.07 | 0.07 | 0.08 |
| chrIX:390479:390679:+@chrIX:390812:391012   | 0.97 | 0.94 | 0.93 |
| chrIX:68515:68715:+@chrIX:69150:69350:+@    | 0.08 | 0.07 | 0.1  |
| chrVII:946127:946327:+@chrVII:946421:94665  | NA   | NA   |      |
| chrVIII:315571:315771:-@chrVIII:315859:3160 | NA   | 0.18 | 0.21 |
| chrII:479145:479345:+@chrII:479435:479635:  | 0.37 | 0.26 | 0.39 |
| chrV:362712:362912:+@chrV:363093:363293:-   | 0.14 | 0.12 | 0.18 |
| chrIV:65106:65306:+@chrIV:65378:65578:+@    | 0.32 | 0.37 | 0.23 |
| chrXVI:281940:282140:+@chrXVI:282666:2828   | 0.03 | 0.02 | 0.03 |
| chrV:147994:148194:+@chrV:148283:148483:-   | 0.69 | 0.83 | 0.98 |
| chrIV:1506858:1507058:-@chrIV:1507315:150   | 0.94 | 0.97 | 0.94 |
| chrXV:242241:242441:-@chrXV:242505:242705   | 0.95 | 0.81 | 0.88 |
| chrIV:1450257:1450457:-@chrIV:1450847:145   | 0.05 | 0.03 | 0.07 |
| chrIV:337324:337524:+@chrIV:337635:337835   | 0.18 | 0.18 | 0.26 |
| chrII:170420:170620:+@chrII:170805:171005:  | 1    | 0.99 | 1    |
| chrXII:1066884:1067084:+@chrXII:1067364:10  | 0.78 | 0.81 | 0.86 |
| chrI:128321:128521:-@chrI:129022:129222:-@  | 0.97 | 0.98 | 0.98 |
| chrVIII:147916:148116:-@chrVIII:148667:1488 | 0.55 | 0.42 | 0.63 |
| chrXIV:494122:494322:-@chrXIV:494974:4951   | 1    | 1    | 1    |
| chrVIII:505047:505247:-@chrVIII:505517:5057 | 0.03 | 0.02 | 0.07 |
| chrXVI:445302:445502:-@chrXVI:445577:4457   | 0.89 | 0.91 | NA   |
| chrX:387148:387348:-@chrX:387436:387636:-   | 0.7  | 0.72 | 0.61 |
| chrX:468983:469183:-@chrX:469264:469606:-   | 0.92 | 0.99 | 0.99 |
| chrII:168224:168424:+@chrII:168809:169009:  | 0.04 | 0.04 | 0.06 |
| chrIV:121877:122077:+@chrIV:122195:122402   | 0.97 | 0.93 | 0.97 |
| chrVIII:498519:498719:-@chrVIII:498787:4989 | 0.51 | 0.58 | 0.54 |
| chrXIV:331125:331325:+@chrXIV:331838:3320   | 0.07 | 0.05 | 0.1  |
| chrII:342498:342698:+@chrII:342790:342990:  | 0.9  | 0.9  | 0.94 |
| chrII:59949:60149:-@chrII:60698:60898:-@A3  | 1    | 1    | 1    |
| chrII:462009:462209:+@chrII:462290:462490:  | 0.81 | 0.89 | 0.71 |
| chrVII:497165:497365:-@chrVII:497459:49820  | 0.89 | 0.67 | 0.67 |
| chrXI:430255:430455:-@chrXI:430597:430797   | 0.5  | 0.38 | 0.57 |
| chrXVI:138525:138725:+@chrXVI:138865:1390   | 0.16 | 0.23 | 0.23 |
| chrXII:788913:789113:-@chrXII:789219:78941  | 1    | 1    | 1    |
| chrX:503570:503770:+@chrX:503982:504182:-   | 0.83 | 0.97 | 0.8  |
| chrIX:47498:47698:+@chrIX:47761:47965:+@    | 0.58 | 0.61 | 0.49 |
| chrXIII:537248:537448:+@chrXIII:537565:537  | NA   | NA   |      |
| chrXIII:550601:550801:-@chrXIII:551204:5514 | 0.12 | 0.1  | 0.15 |
| chrXII:819130:819330:+@chrXII:819778:81997  | 0.08 | 0.06 | 0.1  |
| chrVI:64399:64599:-@chrVI:64921:65121:-@ai  | 0.96 | 0.57 | 0.99 |
| chrIV:1319520:1319720:-@chrIV:1319817:1320  | 0.3  | 0.43 | 0.63 |
| chrIV:733502:733702:-@chrIV:733776:733976:  | 0.23 | 0.29 | 0.3  |
| chrVII:61931:62131:+@chrVII:62184:62415:+@  | 0.99 | 0.99 | 0.99 |
| chrXIV:609590:609790:+@chrXIV:609875:6100   | 0.93 | 0.94 | 0.95 |
| chrVIII:255437:255637:-@chrVIII:255751:2559 | NA   | NA   |      |
| chrIX:348163:348363:-@chrIX:348495:348695   | 0.21 | 0.19 | 0.23 |
| chrVII:72788:72988:-@chrVII:73138:73338:-@  | 0.21 | 0.18 | 0.24 |

|                                               |      |      |      |
|-----------------------------------------------|------|------|------|
| chrXIV:545091:545291:+@chrXIV:545371:5455     | 0.21 | 0.42 | 0.32 |
| chrII:59989:60189:-@chrII:60698:60898:-@A3    | 1    | 1    | 1    |
| chrIII:293739:293939:+@chrIII:293994:29419:NA | NA   | NA   |      |
| chrXIV:426903:427103:+@chrXIV:427193:4273     | 0.95 | 0.99 | 0.98 |
| chrXII:242121:242321:+@chrXII:242681:24336    | 0.78 | 0.77 | 0.79 |
| chrXI:282895:283095:+@chrXI:283422:283622     | 0.01 | 0.03 | 0.03 |
| chrXIII:854616:854816:+@chrXIII:854899:855    | 0.15 | 0.18 | 0.22 |
| chrII:110679:110879:+@chrII:110949:111149:    | 0.76 | 0.76 | 0.9  |
| chrIV:1238430:1238630:-@chrIV:1238825:1239    | 0.99 | 1    | 0.98 |
| chrII:142549:142749:-@chrII:142847:143047:-   | 0.16 | 0.14 | 0.2  |
| chrIV:451211:451411:-@chrIV:451491:451691:    | 0.99 | 0.99 | 0.99 |
| chrXI:155213:155413:+@chrXI:155637:155855     | 1    | 1    | 1    |
| chrXIII:551751:551951:+@chrXIII:552496:552    | 0.84 | 0.82 | 0.85 |
| chrXII:765981:766181:-@chrXII:766250:76645    | 0.83 | 0.63 | 0.92 |
| chrIV:117466:117666:+@chrIV:118158:118358     | 0.02 | 0.01 | 0.04 |
| chrXIV:494324:494524:-@chrXIV:494974:4951     | 0.14 | 0.07 | 0.11 |
| chrXIII:205897:206097:+@chrXIII:206204:206    | 0.39 | 0.19 | 0.35 |
| chrXIV:414711:414911:+@chrXIV:415914:4161     | 0.02 | 0.03 | 0.03 |
| chrIV:254774:254974:-@chrIV:255045:255245:    | 0.95 | 0.94 | 0.89 |
| chrXII:453498:453698:-@chrXII:462837:46763    | 0.94 | 0.96 | 0.95 |
| chrXV:240747:240947:-@chrXV:241026:241226NA   |      | 0.33 | 0.19 |
| chrXI:220577:220777:+@chrXI:220832:221032     | 1    | 1    | 1    |
| chrVIII:189549:189749:-@chrVIII:189851:1900   | 0.65 | 0.51 | 0.59 |
| chrVII:438893:439093:+@chrVII:439324:43952    | 0.55 | 0.46 | 0.54 |
| chrVII:436112:436312:+@chrVII:436375:43657:NA | NA   | NA   |      |
| chrXI:82798:82998:+@chrXI:83075:83275:+@      | 0.16 | 0.25 | 0.19 |
| chrXIV:622744:622944:+@chrXIV:623287:6234     | 0.19 | 0.21 | 0.39 |
| chrXVI:794829:795029:+@chrXVI:795378:7955     | 0.9  | 0.9  | 0.93 |
| chrXII:451857:452057:-@chrXII:461196:46763    | 0.98 | 0.89 | 0.94 |
| chrXIII:650960:651160:+@chrXIII:651624:651    | 0.22 | 0.16 | 0.27 |
| chrV:183969:184169:-@chrV:184678:184878:-@    | 0.7  | 0.67 | 0.76 |
| chrX:4381:4581:-@chrX:4970:5170:-@annotat     | 0.97 | 0.94 | 0.97 |
| chrXIV:380489:380689:-@chrXIV:380782:3809     | 0.23 | 0.27 | 0.27 |
| chrXVI:345244:345444:-@chrXVI:345597:3457     | 0.43 | 0.39 | 0.36 |
| chrIV:239198:239398:-@chrIV:239510:239710:    | 0.15 | 0.35 | 0.16 |
| chrXVI:697763:697963:-@chrXVI:698315:6985     | 0.94 | 0.96 | 0.95 |
| chrIII:106833:107033:+@chrIII:107111:10750    | 0.97 | 0.97 | 0.97 |
| chrXII:765873:766073:-@chrXII:766130:76633    | 0.72 | 0.71 | 0.8  |
| chrXIV:185291:185491:+@chrXIV:185567:1857     | 0.93 | 0.99 | 0.99 |
| chrXVI:653967:654167:+@chrXVI:654571:6547     | 0.07 | 0.04 | 0.09 |
| chrIX:98895:99095:-@chrIX:99386:99586:-@ar    | 0.09 | 0.05 | 0.1  |
| chrVII:364764:364964:-@chrVII:365433:36563    | 0.03 | 0.03 | 0.05 |
| chrIV:1073112:1073312:-@chrIV:1073402:1073    | 0.56 | 0.36 | 0.67 |
| chrX:580147:580347:+@chrX:581053:581253:-     | 1    | 1    | 1    |
| chrX:570367:570567:-@chrX:570641:570841:-     | 1    | 1    | 1    |
| chrXV:29475:29675:+@chrXV:30636:30836:+@      | 0.99 | 1    | 0.99 |
| chrX:649314:649514:-@chrX:649658:649858:-     | 0.74 | 0.48 | 0.39 |
| chrII:653168:653368:+@chrII:653453:653725:    | 0.9  | 0.97 | 0.97 |
| chrXIII:236391:236591:+@chrXIII:236954:237    | 0.18 | 0.55 | 0.49 |

|                                                |      |         |      |
|------------------------------------------------|------|---------|------|
| chrII:462229:462429:+@chrII:462500:462700:     | 0.46 | 0.51    | 0.56 |
| chrXVI:942850:943050:+@chrXVI:943199:943300:   | 0.98 | 0.91    | 0.91 |
| chrXIII:211244:211444:+@chrXIII:211571:211771: | 0.2  | 0.26    | 0.32 |
| chrXII:522469:522669:+@chrXII:523029:523229:   | 0.06 | 0.03    | 0.07 |
| chrV:432471:432671:+@chrV:433197:433397:-      | 0.05 | 0.1     | 0.07 |
| chrXIV:350757:350957:+@chrXIV:351054:351254:   | 0.23 | 0.23    | 0.36 |
| chrXVI:656305:656505:-@chrXVI:656576:656776:   | 0.98 | 0.98    | 0.98 |
| chrII:332675:332875:+@chrII:333387:333587:     | 0.07 | 0.04    | 0.07 |
| chrXIII:753542:753742:-@chrXIII:754220:754420: | 0.15 | 0.09    | 0.16 |
| chrIV:340610:340810:-@chrIV:341184:341384:     | 0.06 | 0.05    | 0.09 |
| chrXVI:172962:173162:+@chrXVI:173572:173772:   | 0.39 | 0.89    | 0.89 |
| chrIV:399161:399361:+@chrIV:399485:399696:     | 0.58 | 0.56    | 0.55 |
| chrXVI:677993:678193:-@chrXVI:678280:678480:   | 0.22 | 0.21    | 0.25 |
| chrXII:743953:744153:+@chrXII:744288:744488:   | 0.29 | 0.5     | 0.78 |
| chrVII:365309:365509:-@chrVII:365986:366186:   | 1    | 1       | 1    |
| chrIV:1266569:1266769:-@chrIV:1266862:1267062: | 0.54 | 0.34    | 0.48 |
| chrVI:75639:75839:+@chrVI:76092:76292:+@       | 1    | 1       | 1    |
| chrXVI:412056:412256:+@chrXVI:412996:413296:   | 0.99 | 1       | 0.99 |
| chrIV:1236642:1236842:+@chrIV:1237609:1237809: | 0.35 | 0.43    | 0.41 |
| chrVIII:250955:251155:+@chrVIII:251249:251449: | 0.91 | 0.95    | 0.84 |
| chrII:115274:115474:+@chrII:115570:115770:     | 0.98 | 0.99    | 0.99 |
| chrVIII:187314:187514:-@chrVIII:187677:187877: | 0.08 | 0.06    | 0.13 |
| chrVIII:138040:138240:-@chrVIII:138409:138609: | 0.16 | 0.25    | 0.2  |
| chrX:50068:50268:-@chrX:50412:50612:-@an       | 0.31 | 0.36    | 0.42 |
| chrXI:109377:109577:+@chrXI:109884:110091:     | 0.32 | 0.3     | 0.28 |
| chrVII:555630:555830:+@chrVII:556308:556508:   | 0.07 | 0.05    | 0.99 |
| chrXIV:365835:366035:+@chrXIV:366158:366358:   | 0.48 | 0.66    | 0.72 |
| chrXII:453164:453364:-@chrXII:462503:462703:   | 0.96 | 0.92    | 0.94 |
| chrXI:158415:158615:+@chrXI:158967:159167:     | 0.16 | 0.11    | 0.19 |
| chrII:168354:168554:+@chrII:168809:169009:     | 1    | 1       | 1    |
| chrVII:252985:253185:-@chrVII:253249:253449:   | 0.93 | 0.96    | 0.97 |
| chrXI:431834:432034:+@chrXI:432433:432633:     | 0.05 | 0.03    | 0.06 |
| chrXIII:610607:610807:+@chrXIII:611037:611237: | 0.93 | 0.99    | 0.97 |
| chrVIII:262154:262354:-@chrVIII:262441:262641: |      | 0.91 NA |      |
| chrII:46858:47058:-@chrII:47147:47347:-@an     | 0.88 | 0.82    | 0.96 |
| chrV:306125:306325:+@chrV:306792:306992:-      | 0.06 | 0.04    | 0.07 |
| chrXVI:404756:404956:+@chrXVI:405458:405658:   | 0.12 | 0.42    | 0.51 |
| chrXIII:99059:99259:-@chrXIII:99376:99576:-    | 0.11 | 0.11    | 0.11 |
| chrXIII:914204:914404:-@chrXIII:914649:914849: | 1    | 0.99    | 0.99 |
| chrXIII:225691:225891:+@chrXIII:226290:226490: | 0.04 | 0.04    | 0.06 |
| chrXI:446951:447151:-@chrXI:447243:447443:     | 0.99 | 0.99    | 0.96 |
| chrXI:551480:551680:+@chrXI:552003:552244:     | 0.63 | 0.59    | 0.67 |
| chrIV:307133:307333:-@chrIV:307766:307966:     | 0.06 | 0.04    | 0.07 |
| chrVII:920464:920664:+@chrVII:921120:921320:   | 0.42 | 0.4     | 0.42 |
| chrXVI:412061:412261:+@chrXVI:413013:413213:   | 0.99 | 1       | 0.99 |
| chrV:158794:158994:-@chrV:159088:159288:-      | 0.16 | 0.15    | 0.19 |
| chrII:170420:170620:+@chrII:170758:171005:     | 1    | 1       | 1    |
| chrXII:855677:855877:+@chrXII:856428:856628:   | 0.27 | 0.32    | 0.27 |
| chrXII:242121:242321:+@chrXII:242691:243391:   | 1    | 1       | 1    |

|                                             |      |      |      |
|---------------------------------------------|------|------|------|
| chrVII:438897:439097:+@chrVII:439324:4395   | 0.63 | 0.64 | 0.65 |
| chrVIII:107631:107831:+@chrVIII:107895:108  | 0.26 | 0.36 | 0.26 |
| chrXII:244185:244385:-@chrXII:245150:24535  | 1    | 1    | 1    |
| chrVII:167154:167354:+@chrVII:167995:16819  | 0.63 | 0.58 | 0.5  |
| chrIV:431186:431386:-@chrIV:431473:431673:  | 0.31 | 0.39 | 0.34 |
| chrXIV:728354:728554:+@chrXIV:728922:7291   | 1    | 0.99 | 0.99 |
| chrVII:435479:435679:+@chrVII:435750:4359   | NA   | NA   |      |
| chrVII:543438:543638:+@chrVII:543722:5439   | 0.58 | 0.77 | 0.73 |
| chrXII:250660:250860:-@chrXII:250948:25114  | NA   | NA   |      |
| chrII:366302:366502:-@chrII:366585:366785:- | 0.68 | 0.71 | 0.91 |
| chrV:269551:269751:-@chrV:270149:270349:-   | 0.07 | 0.05 | 0.09 |
| chrII:606080:606280:+@chrII:606669:606869:  | 0.06 | 0.05 | 0.07 |
| chrIII:106833:107033:+@chrIII:107305:10750  | 0.73 | 0.6  | 0.65 |
| chrV:348001:348201:-@chrV:348277:348487:-   | 0.45 | 0.39 | 0.45 |
| chrIV:629705:629905:+@chrIV:630174:630374   | 0.17 | 0.18 | 0.23 |
| chrXV:911885:912085:-@chrXV:912433:91263    | 0.98 | 0.99 | 0.98 |
| chrIV:1406792:1406992:+@chrIV:1407232:140   | 0.96 | 0.98 | 0.98 |
| chrIV:1355036:1355236:-@chrIV:1355551:135   | 0.11 | 0.07 | 0.16 |
| chrXVI:794829:795029:+@chrXVI:795395:795    | 0.13 | 0.12 | 0.11 |
| chrXVI:29340:29540:+@chrXVI:29659:29859:+   | 0.96 | 0.98 | 0.97 |
| chrII:170476:170676:+@chrII:170805:171005:  | 0.18 | 0.2  | 0.24 |
| chrX:156589:156789:-@chrX:157250:157450:-   | 0.04 | 0.03 | 0.08 |
| chrVII:439181:439381:+@chrVII:439480:4396   | 1    | 1    | 1    |
| chrVII:726838:727038:+@chrVII:727358:7275   | 0.03 | 0.03 | 0.08 |
| chrXII:281227:281427:-@chrXII:281629:28182  | 1    | 0.99 | 1    |
| chrXV:505737:505937:+@chrXV:505996:50653    | 1    | 1    | 1    |
| chrXVI:911076:911276:+@chrXVI:911353:911    | 0.14 | 0.12 | 0.18 |
| chrVII:249686:249886:+@chrVII:250087:2502   | 0.09 | 0.18 | 0.17 |
| chrXI:618174:618374:-@chrXI:618743:618943   | 0.37 | 0.36 | 0.73 |
| chrII:679742:679942:-@chrII:680040:680240:- | 0.22 | 0.34 | 0.22 |
| chrVIII:129328:129528:+@chrVIII:129648:129  | 0.12 | 0.13 | 0.17 |
| chrIV:601163:601363:-@chrIV:601518:601718:  | 1    | 1    | 1    |
| chrVII:1084682:1084882:+@chrVII:1085031:10  | 0.72 | 0.58 | 0.6  |
| chrXII:242121:242321:+@chrXII:242827:2433   | 0.98 | 0.98 | 0.99 |
| chrXIV:62172:62372:-@chrXIV:62924:63124:-   | 0.11 | 0.08 | 0.13 |
| chrV:468041:468241:+@chrV:468388:468588:-   | 0.98 | 0.99 | 0.99 |
| chrIV:457817:458017:-@chrIV:458098:458298:  | 0.4  | 0.32 | 0.26 |
| chrXII:3715:3915:-@chrXII:4015:4215:-@anno  | 0.99 | 0.99 | 0.98 |
| chrVII:365326:365526:-@chrVII:365986:36618  | 0.15 | 0.16 | 0.29 |
| chrII:565550:565750:+@chrII:566936:567136:  | 0.99 | 0.98 | 0.99 |
| chrXII:694182:694382:+@chrXII:694473:6946   | 0.28 | NA   | 0.34 |
| chrIX:23243:23443:+@chrIX:23765:23965:+@    | 0.99 | 1    | 0.99 |
| chrXIII:337617:337817:+@chrXIII:337904:338  | 0.28 | 0.29 | 0.43 |
| chrXV:92240:92440:-@chrXV:92831:93031:-@    | 0.08 | 0.05 | 0.09 |
| chrIV:1401600:1401800:+@chrIV:1402185:140   | 0.16 | 0.1  | 0.16 |
| chrIX:155022:155222:+@chrIX:155311:155511   | 0.46 | 0.23 | 0.53 |
| chrXII:898348:898548:+@chrXII:898646:8988   | 0.2  | 0.16 | 0.31 |
| chrII:186152:186352:-@chrII:186428:186628:- | 0.39 | 0.4  | 0.34 |
| chrVIII:298160:298360:-@chrVIII:298485:298  | 0.11 | 0.12 | NA   |



|                                             |      |      |      |
|---------------------------------------------|------|------|------|
| chrXII:327058:327258:-@chrXII:327400:32760  | 0.2  | 0.16 | 0.34 |
| chrXIII:499678:499878:-@chrXIII:500152:5003 | 0.09 | 0.07 | 0.08 |
| chrII:392980:393180:+@chrII:393511:393870:  | 0.66 | 0.61 | 0.62 |
| chrIV:1359769:1359969:+@chrIV:1360405:136   | 0.06 | 0.07 | 0.08 |
| chrXIV:282424:282624:-@chrXIV:282685:2830   | 1    | 1    | 1    |
| chrXIII:3591:3791:-@chrXIII:3891:4091:-@anr | 0.99 | 0.98 | 0.96 |
| chrIX:231757:231957:-@chrIX:232367:232567   | 0.06 | 0.04 | 0.09 |
| chrVII:946120:946320:+@chrVII:946421:9466   | NA   | NA   |      |
| chrIV:1103609:1103809:+@chrIV:1103893:110   | 0.45 | 0.52 | 0.63 |
| chrXIII:732265:732465:+@chrXIII:732876:733  | 0.05 | 0.04 | 0.1  |
| chrXII:456244:456444:-@chrXII:465583:46763  | 1    | 0.96 | 1    |
| chrXII:982258:982458:-@chrXII:982539:98273  | 0.68 | 0.77 | 0.34 |
| chrIV:267525:267725:+@chrIV:267807:268007   | 0.38 | 0.23 | 0.39 |
| chrII:414553:414753:-@chrII:415260:415460:- | 0.07 | 0.08 | 0.11 |
| chrVII:937012:937212:+@chrVII:937321:9375   | 0.99 | 0.99 | 0.99 |
| chrV:548352:548552:+@chrV:548645:548845:-   | 0.95 | 0.98 | 0.96 |
| chrXIII:517363:517563:+@chrXIII:517886:518  | 0.08 | 0.15 | 0.33 |
| chrI:87187:87387:+@chrI:87501:87701:+@anr   | 0.13 | 0.22 | 0.17 |
| chrIV:417021:417221:-@chrIV:417627:417827:  | 0.32 | 0.29 | 0.53 |
| chrXVI:716849:717049:-@chrXVI:717147:7173   | 0.99 | 1    | 0.99 |
| chrIV:306605:306805:-@chrIV:307074:307274:  | 1    | 1    | 1    |
| chrIV:121877:122077:+@chrIV:122187:122402   | 0.73 | 0.76 | 0.89 |
| chrVII:156999:157199:-@chrVII:157283:15748  | NA   | NA   |      |
| chrXVI:377795:377995:-@chrXVI:378390:3785   | 0.03 | 0.03 | 0.05 |
| chrXIV:185291:185491:+@chrXIV:185587:1857   | 0.42 | 0.27 | 0.38 |
| chrX:399992:400192:+@chrX:400256:400510:    | 0.98 | 0.98 | 0.98 |
| chrXII:712525:712725:-@chrXII:713156:71335  | 0.08 | 0.08 | 0.2  |
| chrXII:242121:242321:+@chrXII:242776:2433   | 1    | 1    | 1    |
| chrVI:221067:221267:-@chrVI:221415:221615   | 0.1  | 0.08 | 0.13 |
| chrXIV:283523:283723:+@chrXIV:283806:284    | NA   | NA   |      |
| chrIV:217402:217602:+@chrIV:218008:218208   | 0.03 | 0.03 | 0.08 |
| chrXVI:582358:582558:-@chrXVI:582702:5832   | 0.43 | 0.52 | 0.65 |
| chrV:423624:423824:+@chrV:423952:424152:-   | 0.14 | 0.11 | 0.22 |
| chrX:435027:435227:+@chrX:435344:435544:    | 0.1  | 0.09 | 0.14 |
| chrVI:241809:242009:+@chrVI:242082:242282   | 0.81 | 0.73 | 0.67 |
| chrXII:550258:550458:-@chrXII:550575:55077  | 0.37 | 0.33 | 0.5  |
| chrVIII:103417:103617:-@chrVIII:103857:104  | 0.98 | 0.98 | 0.98 |
| chrVIII:382106:382306:-@chrVIII:382748:382  | 0.06 | 0.07 | 0.14 |
| chrI:150806:151006:-@chrI:151097:151297:-@  | NA   | NA   |      |
| chrIV:169150:169350:+@chrIV:169602:169802   | 1    | 1    | 1    |
| chrXIII:559582:559782:+@chrXIII:560158:560  | 0.29 | 0.3  | 0.34 |
| chrX:365584:365784:+@chrX:365903:366103:    | 0.22 | 0.19 | 0.16 |
| chrXIII:666733:666933:-@chrXIII:667018:667  | 0.66 | 0.3  | 0.69 |
| chrXVI:492718:492918:-@chrXVI:493021:4932   | 0.32 | 0.16 | 0.39 |
| chrXV:296475:296675:+@chrXV:297193:29739    | 0.95 | 0.97 | 0.93 |
| chrVII:61931:62131:+@chrVII:62197:62415:+   | 0.98 | 0.96 | 0.98 |
| chrXII:787494:787694:+@chrXII:788229:7884   | 1    | 1    | 1    |
| chrIX:4398:4598:-@chrIX:4987:5187:-@annota  | 0.98 | 0.94 | 0.98 |
| chrIV:1329546:1329746:+@chrIV:1329816:133   | 1    | 1    | 1    |

|                                             |      |         |      |
|---------------------------------------------|------|---------|------|
| chrIV:655003:655203:+@chrIV:655273:655473   | 1    | 1       | 1    |
| chrXIII:720998:721198:-@chrXIII:721346:7215 | 0.32 | 0.33    | 0.34 |
| chrXIV:557374:557574:+@chrXIV:557685:5578   | 0.99 | 0.99    | 0.99 |
| chrV:307756:307956:+@chrV:308068:308268:-   | 0.12 | 0.18    | 0.27 |
| chrXVI:271103:271303:+@chrXVI:271897:2720   | 1    | 1       | 1    |
| chrXIII:424797:424997:+@chrXIII:425154:425  | 0.12 | 0.12    | 0.14 |
| chrXII:28262:28462:-@chrXII:28835:29035:-@  | 0.93 | 0.94    | 0.95 |
| chrV:369220:369420:-@chrV:369489:369689:-@  | 0.99 | 0.98    | 0.98 |
| chrVII:61931:62131:+@chrVII:62190:62415:+@  | 0.42 | 0.51    | 0.68 |
| chrVIII:104205:104405:+@chrVIII:104804:105  | 0.08 | 0.07    | 0.09 |
| chrII:110220:110420:-@chrII:110506:110706:- | 0.14 | 0.17    | 0.2  |
| chrXVI:305106:305306:+@chrXVI:305412:3056   | 0.23 | 0.18    | 0.35 |
| chrVI:203092:203292:-@chrVI:203387:203587   | 0.41 | 0.34    | 0.45 |
| chrXIII:557628:557828:-@chrXIII:558002:5582 | 1    | 1       | 1    |
| chrXIV:557410:557610:+@chrXIV:557685:5578   | 0.5  | 0.54    | 0.55 |
| chrXII:931149:931349:-@chrXII:931699:93189  | 0.03 | 0.03    | 0.05 |
| chrXII:398332:398532:+@chrXII:398627:3988   | NA   | 0.31 NA |      |
| chrXII:9250:9450:-@chrXII:9550:9750:-@anno  | 0.99 | 0.99    | 0.98 |
| chrV:131576:131776:+@chrV:131900:132100:-   | 0.13 | 0.15    | 0.22 |
| chrIV:491359:491559:+@chrIV:491899:492099   | 0.05 | 0.04    | 0.06 |
| chrXVI:303361:303561:+@chrXVI:303625:3038   | 1    | 1       | 1    |
| chrXVI:883187:883387:+@chrXVI:883487:8836   | 0.11 | 0.09    | 0.12 |
| chrIV:1319417:1319617:-@chrIV:1319698:1319  | 0.37 | 0.45    | 0.78 |
| chrXIV:443626:443826:-@chrXIV:444172:4443   | 0.08 | 0.09    | 0.1  |
| chrVIII:525903:526103:-@chrVIII:526207:5264 | 0.93 | 0.96    | 0.98 |
| chrI:128314:128514:-@chrI:129022:129222:-@  | 0.98 | 1       | 0.99 |
| chrXV:678179:678379:-@chrXV:678791:678991   | 0.03 | 0.03    | 0.08 |
| chrXVI:218446:218646:+@chrXVI:218747:2189   | 0.75 | 0.79    | 0.65 |
| chrXIV:721570:721770:-@chrXIV:722303:72250  | 0.04 | 0.17    | 0.14 |
| chrXII:1024372:1024572:+@chrXII:1024655:102 | NA   | NA      | 0.9  |
| chrIX:23556:23756:-@chrIX:23865:24065:-@no  | 0.99 | 1       | 0.99 |
| chrXV:349297:349497:-@chrXV:349599:349799   | 0.97 | 0.98    | 0.98 |
| chrVI:63659:63859:-@chrVI:63974:64174:-@ai  | 0.27 | 0.15    | 0.35 |
| chrIII:101433:101633:-@chrIII:101701:101901 | 0.18 | 0.22    | 0.24 |
| chrXVI:95953:96153:-@chrXVI:96234:96434:-@  | 0.51 | 0.55    | 0.61 |
| chrXII:986941:987141:+@chrXII:987222:98750  | 0.99 | 0.99    | 0.99 |
| chrV:239423:239623:-@chrV:239712:239912:-@  | NA   | NA      |      |
| chrIV:1212677:1212877:+@chrIV:1212979:121   | 0.28 | 0.28    | 0.25 |
| chrI:142053:142253:+@chrI:142620:142820:+   | 0.06 | 0.08    | 0.08 |
| chrII:59993:60193:-@chrII:60698:60898:-@an  | 0.05 | 0.04    | 0.05 |
| chrVII:859060:859260:-@chrVII:859474:85967  | 0.26 | 0.37    | 0.33 |
| chrXIII:139890:140090:-@chrXIII:140184:1403 | 0.14 | 0.22    | 0.25 |
| chrXII:286267:286467:-@chrXII:286557:28675  | 0.34 | 0.27    | 0.33 |
| chrII:601903:602103:+@chrII:602217:602417:  | 0.98 | 0.95    | 0.98 |
| chrIV:215957:216157:+@chrIV:216513:216722   | 0.69 | 0.69    | 0.8  |
| chrXIV:144949:145149:-@chrXIV:145255:14540  | 0.12 | 0.19    | 0.18 |
| chrII:426316:426516:-@chrII:426874:427074:- | 0.71 | 0.76    | 0.75 |
| chrVII:682748:682948:-@chrVII:683066:68326  | 0.98 | 0.98    | 0.98 |
| chrIII:294039:294239:+@chrIII:294292:29449  | NA   | NA      |      |

|                                                 |      |      |      |
|-------------------------------------------------|------|------|------|
| chrIV:427266:427466:+@chrIV:427575:427775       | 0.19 | 0.2  | 0.27 |
| chrXIV:282424:282624:-@chrXIV:282760:283000     | 1    | 1    | 1    |
| chrXI:625701:625901:+@chrXI:625977:626187       | 0.68 | 0.7  | 0.7  |
| chrVIII:1697:1897:-@chrVIII:2671:2871:-@anr     | 1    | 0.99 | 1    |
| chrXVI:623377:623577:+@chrXVI:623711:623900     | 0.1  | 0.1  | 0.1  |
| chrXI:437637:437837:+@chrXI:437914:438126       | 0.94 | 0.92 | 0.97 |
| chrVI:54177:54377:-@chrVI:54687:54887:-@anr     | 0.02 | 0.04 | 0.04 |
| chrVI:223240:223440:-@chrVI:223728:223928       | 0.18 | 0.14 | 0.21 |
| chrIX:316571:316771:+@chrIX:317172:317372       | 0.05 | 0.05 | 0.07 |
| chrX:73596:73796:+@chrX:74205:74405:+@anr       | 0.27 | 0.56 | 0.59 |
| chrXII:1028668:1028868:+@chrXII:1029253:1029453 | 0.15 | 0.11 | 0.21 |
| chrXIV:62161:62361:-@chrXIV:62924:63124:-@anr   | 0.99 | 1    | 1    |
| chrXII:40021:40221:-@chrXII:40401:40601:-@anr   | 0.08 | 0.1  | 0.1  |
| chrXIV:48093:48293:+@chrXIV:48402:48602:+@anr   | 0.16 | 0.16 | 0.21 |
| chrXII:452765:452965:-@chrXII:462104:46763      | 0.63 | 0.72 | 0.65 |
| chrXIII:82090:82290:+@chrXIII:82374:82574:-@anr | 0.25 | 0.2  | 0.31 |
| chrVII:534273:534473:-@chrVII:534782:534980     | 0.09 | 0.08 | 0.12 |
| chrIII:172915:173115:-@chrIII:173199:173399     | 0.2  | 0.23 | 0.26 |
| chrXV:93643:93843:-@chrXV:94291:94491:-@anr     | 0.02 | 0.02 | 0.03 |
| chrXVI:243289:243489:-@chrXVI:244026:244216     | 0.99 | 0.99 | 1    |
| chrXI:447506:447706:-@chrXI:447811:448011       | 0.32 | 0.21 | 0.43 |
| chrXIII:163108:163308:-@chrXIII:163717:163917   | 0.05 | 0.07 | 0.09 |
| chrXV:552465:552665:-@chrXV:552875:553075       | 0.1  | 0.13 | 0.13 |
| chrII:3916:4116:-@chrII:4216:4416:-@annotat     | 0.99 | 0.99 | 0.99 |
| chrII:124954:125154:+@chrII:125271:125471:      | 0.09 | 0.1  | 0.11 |
| chrIV:1329525:1329725:+@chrIV:1329816:1330016   | 1    | 1    | 1    |
| chrXII:548477:548677:-@chrXII:548764:548964     | 0.35 | 0.26 | 0.39 |
| chrIV:715047:715247:-@chrIV:715359:715559:      | 0.25 | 0.39 | 0.29 |
| chrXIII:225039:225239:-@chrXIII:225339:225539   | 0.36 | 0.26 | 0.45 |
| chrX:702598:702798:-@chrX:703055:703255:-@anr   | 0.04 | 0.04 | 0.09 |
| chrIII:177706:177906:-@chrIII:178214:178414     | 0.03 | 0.03 | 0.06 |
| chrII:392980:393180:+@chrII:393508:393870:      | 0.95 | 0.95 | 0.93 |
| chrIX:225609:225809:-@chrIX:225900:226100 NA    | NA   | NA   | NA   |
| chrXVI:673548:673748:+@chrXVI:674377:674577     | 1    | 1    | 1    |
| chrIX:166234:166434:+@chrIX:166520:166720       | 0.43 | 0.33 | 0.29 |
| chrXVI:729185:729385:-@chrXVI:729482:729682     | 0.06 | 0.19 | 0.18 |
| chrXIII:551751:551951:+@chrXIII:552508:552708   | 0.89 | 0.9  | 0.95 |
| chrXII:263005:263205:+@chrXII:263595:263795     | 0.12 | 0.11 | 0.28 |
| chrXIV:534674:534874:-@chrXIV:534966:535166     | 0.25 | 0.23 | 0.39 |
| chrVIII:354664:354864:+@chrVIII:354956:355156   | 0.28 | 0.34 | 0.38 |
| chrII:406827:407027:-@chrII:407123:407323:-@anr | 0.09 | 0.09 | 0.07 |
| chrIII:111357:111557:-@chrIII:111634:111834     | 0.94 | 0.86 | 0.93 |
| chrXII:856374:856574:+@chrXII:857058:857258     | 0.42 | 0.37 | 0.62 |
| chrIV:308227:308427:+@chrIV:308793:308993       | 0.06 | 0.06 | 0.11 |
| chrXIV:63818:64018:-@chrXIV:64451:64651:-@anr   | 0.16 | 0.19 | 0.35 |
| chrXII:986941:987141:+@chrXII:987213:987513     | 0.94 | 0.92 | 0.93 |
| chrX:75738:75938:+@chrX:76325:76525:+@anr       | 0.04 | 0.02 | 0.09 |
| chrXV:866949:867149:+@chrXV:867587:867787       | 0.08 | 0.06 | 0.07 |
| chrXV:373699:373899:+@chrXV:374123:374323       | 0.98 | 0.99 | 0.98 |

|                                                |      |         |      |
|------------------------------------------------|------|---------|------|
| chrV:307546:307746:+@chrV:307849:308049:-      | 0.15 | 0.18    | 0.18 |
| chrXIV:282424:282624:-@chrXIV:282745:283000:-  | 1    | 1       | 1    |
| chrXVI:833493:833693:+@chrXVI:833828:834000:-  | 0.89 | 0.59    | 0.8  |
| chrXV:423457:423657:-@chrXV:423735:423935:-    | 0.99 | 1       | 0.99 |
| chrXII:233442:233642:-@chrXII:233886:234086:-  | 1    | 1       | 1    |
| chrX:396293:396493:-@chrX:396571:396771:-      | 0.19 | 0.27    | 0.37 |
| chrXVI:5640:5840:-@chrXVI:5989:6189:-@anno     | 0.73 | 0.58    | 0.61 |
| chrIV:322082:322282:+@chrIV:322704:322904:-    | 0.01 | 0.01    | 0.03 |
| chrVII:31226:31426:-@chrVII:31579:31779:-@anno | NA   | NA      | NA   |
| chrXI:155071:155271:+@chrXI:155637:155855:-    | 0.69 | 0.66    | 0.6  |
| chrV:166571:166771:-@chrV:166875:167075:-      | 0.16 | 0.19    | 0.18 |
| chrXI:437637:437837:+@chrXI:437906:438126:-    | 0.67 | 0.79    | 0.71 |
| chrII:726717:726917:-@chrII:727012:727212:-    | 0.7  | 0.4     | 0.59 |
| chrXII:564254:564454:-@chrXII:564514:564714:-  | 0.68 | 0.62 NA | NA   |
| chrXI:93166:93366:-@chrXI:93466:93666:-@anno   | 0.41 | 0.52    | 0.61 |

|    | DBR1_2_polyA | UPF1_2_polyA | UPF1_1_polyA | DBR1_1_riboZ | DBR1_2_riboZ | sk1_2_riboZ |
|----|--------------|--------------|--------------|--------------|--------------|-------------|
|    | 1            | 1            | 1            | 1            | 1            | 1           |
|    | 0.99         | 0.99         | 0.99         | 0.97         | 0.97         | 0.89        |
|    | 0.07         | 0.09         | 0.08         | 0.97         | 0.97         | 0.03        |
|    | 0.07         | 0.04         | 0.03         | 0.32         | 0.42         | 0.04        |
|    | 0.06         | 0.07         | 0.08         | 1            | 1            | 0.03        |
|    | 0.98         | 0.97         | 0.84         | 0.98         | 0.99         | 0.96        |
|    | 0.97         | 0.99         | 0.99         | 0.87         | 0.97         | 0.88        |
|    | 0.97         | 0.99         | 0.99         | 0.96         | 0.99         | 0.73        |
|    | 0.11         | 0.1          | 0.08         | 0.86         | 0.93         | 0.09        |
|    | 0.69         | 0.47         | 0.54         | 0.82         | 0.92         | 0.42        |
|    | 1            | 1            | 1            | 0.99         | 0.99         | 0.99        |
| NA |              | 0.92         | 0.91         | NA           | NA           | NA          |
|    | 1            | 1            | 1            | 1            | 1            | 0.96        |
|    | 0.88         | 0.95         | 0.94         | 0.96         | 0.89         | 0.94        |
|    | 0.22         | 0.76         | 0.67         | 0.88         | 0.91         | 0.1         |
|    | 0.98         | 0.99         | 1            | 0.99         | 0.99         | 0.77        |
|    | 1            | 1            | 1            | 1            | 1            | 1           |
|    | 0.06         | 0.07         | 0.06         | 1            | 1            | 0.05        |
|    | 0.15         | 0.18         | 0.14         | 0.98         | 0.98         | 0.24        |
|    | 0.08         | 0.12         | 0.1          | 0.95         | 0.94         | 0.04        |
|    | 0.99         | 1            | 1            | 1            | 0.89         | 1           |
|    | 0.09         | 0.15         | 0.13         | 0.89         | 0.85         | 0.03        |
|    | 0.1          | 0.07         | 0.07         | 0.95         | 0.96         | 0.07        |
|    | 0.11         | 0.09         | 0.08         | 0.97         | 0.98         | 0.09        |
|    | 0.08         | 0.11         | 0.11         | 0.93         | 0.93         | 0.04        |
|    | 0.17         | 0.5          | 0.46         | 1            | 1            | 0.06        |
|    | 0.69         | 0.45         | 0.48         | 0.98         | 0.98         | 0.33        |
|    | 0.99         | 0.99         | 0.99         | 0.98         | 0.98         | 0.94        |
|    | 0.26         | 0.19         | 0.17         | 0.94         | 0.96         | 0.24        |
|    | 0.08         | 0.08         | 0.07         | 0.96         | 0.95         | 0.05        |
|    | 0.97         | 0.94         | 0.89         | 0.8          | 0.69         | 0.88        |
|    | 0.62         | 0.79         | 0.63         | 0.5          | 0.51         | 0.59        |
|    | 1            | 1            | 1            | 1            | 1            | 1           |
|    | 0.92         | 0.95         | 0.97         | NA           | NA           | NA          |
|    | 0.14         | 0.11         | 0.08         | 1            | 1            | 0.06        |
|    | 0.96         | 0.98         | 0.97         | 1            | 1            | 0.83        |
|    | 0.99         | 0.99         | 0.98         | 0.93         | 0.86         | 0.79        |
|    | 0.98         | 0.98         | 0.97         | 0.99         | 0.99         | 1           |
|    | 0.21         | 0.17         | 0.24         | 0.27         | 0.33         | NA          |
|    | 0.04         | 0.05         | 0.05         | 0.99         | 0.99         | 0.05        |
|    | 0.06         | 0.1          | 0.08         | 0.93         | 0.94         | 0.03        |
|    | 0.99         | 1            | 1            | 1            | 0.83         | 1           |
|    | 0.52         | 0.6          | 0.63         | 0.36         | 0.33         | NA          |
|    | 1            | 1            | 1            | 1            | 1            | 1           |
|    | 0.94         | NA           | 0.94         | 0.91         | NA           | NA          |
|    | 0.24         | 0.14         | 0.13         | 1            | 1            | 0.06        |
|    | 0.48         | 0.5          | 0.46         | 1            | 1            | 0.53        |

|    |         |      |         |         |         |      |
|----|---------|------|---------|---------|---------|------|
|    | 0.5     | 0.43 | 0.51    | 0.78    | 0.92    | 0.69 |
|    | 0.82    | 0.71 | 0.73    | 1       | 0.77    | 1    |
|    | 0.1     | 0.09 | 0.08    | 0.95    | 0.95    | 0.08 |
|    | 0.94    | 0.97 | 0.98 NA | NA      |         | 0.98 |
|    | 0.1     | 0.1  | 0.09    | 1       | 1       | 0.06 |
| NA | NA      |      | 0.95 NA | NA      | NA      |      |
|    | 0.35    | 0.29 | 0.26 NA | NA      | NA      |      |
|    | 0.36    | 0.29 | 0.43 NA | NA      | NA      |      |
|    | 0.21    | 0.2  | 0.2     | 1       | 1       | 0.13 |
|    | 0.22    | 0.29 | 0.17    | 0.44    | 0.58    | 0.54 |
|    | 0.03    | 0.04 | 0.04    | 0.99    | 0.99    | 0.03 |
|    | 0.94    | 0.98 | 0.99    | 0.72    | 0.59    | 0.55 |
|    | 0.95    | 0.97 | 0.97    | 0.84 NA |         | 0.73 |
|    | 0.93    | 0.91 | 0.96 NA | NA      | NA      |      |
|    | 0.12    | 0.08 | 0.07    | 0.79    | 0.8     | 0.04 |
|    | 0.19    | 0.2  | 0.2     | 0.23    | 0.33    | 0.22 |
|    | 0.99    | 1    | 1       | 0.98    | 0.99    | 0.97 |
|    | 0.88    | 0.9  | 0.84    | 0.99    | 0.99    | 0.69 |
|    | 0.96    | 0.98 | 0.96    | 0.99    | 0.99    | 1    |
|    | 0.48    | 0.64 | 0.58    | 1       | 1       | 0.38 |
|    | 1       | 1    | 1       | 1       | 1       | 1    |
|    | 0.43    | 0.05 | 0.05    | 0.96    | 0.96    | 0.04 |
| NA |         | 0.87 | 0.89 NA | NA      | NA      |      |
|    | 0.69    | 0.88 | 0.52 NA | NA      | NA      |      |
|    | 0.99    | 0.99 | 0.99    | 0.96    | 0.98    | 0.78 |
|    | 0.06    | 0.07 | 0.07    | 0.98    | 0.98    | 0.02 |
|    | 0.9     | 0.9  | 0.9     | 0.95    | 0.85    | 0.76 |
|    | 0.68    | 0.3  | 0.26    | 0.86    | 0.9 NA  |      |
|    | 0.08    | 0.15 | 0.15    | 0.98    | 0.98    | 0.04 |
|    | 0.97    | 0.95 | 0.97 NA | NA      | NA      |      |
|    | 1       | 1    | 1       | 1       | 1       | 1    |
|    | 0.96    | 0.96 | 0.95    | 0.73    | 0.72    | 0.61 |
|    | 0.71    | 0.64 | 0.68    | 0.99    | 0.99    | 0.98 |
|    | 0.51    | 0.59 | 0.63    | 0.7     | 0.7     | 0.44 |
|    | 0.24    | 0.26 | 0.25    | 0.2     | 0.16    | 0.19 |
|    | 1       | 1    | 1       | 0.98    | 0.97    | 0.47 |
|    | 0.91    | 0.73 | 0.94    | 0.94    | 0.92 NA |      |
|    | 0.64    | 0.68 | 0.66    | 0.46    | 0.38    | 0.48 |
| NA | NA      |      | 0.6 NA  | NA      | NA      |      |
|    | 0.17    | 0.22 | 0.19    | 1       | 1       | 0.07 |
|    | 0.08    | 0.1  | 0.09    | 1       | 1       | 0.08 |
|    | 0.96    | 1    | 1       | 1       | 1       | 0.66 |
|    | 0.54    | 0.55 | 0.32    | 0.41    | 0.6 NA  |      |
|    | 0.31    | 0.39 | 0.37    | 0.34    | 0.35    | 0.22 |
|    | 0.99    | 0.98 | 0.98    | 0.98    | 0.97    | 0.99 |
|    | 0.93    | 0.98 | 0.98 NA | NA      | NA      |      |
|    | 0.42 NA | NA   |         | 0.88    | 0.84    | 0.9  |
|    | 0.24    | 0.3  | 0.35    | 0.28    | 0.24    | 0.33 |
|    | 0.24    | 0.19 | 0.22    | 0.43    | 0.42    | 0.28 |

|    |      |      |         |         |         |      |
|----|------|------|---------|---------|---------|------|
|    | 0.4  | 0.42 | 0.42    | 0.33    | 0.42    | 0.21 |
|    | 1    | 1    | 1       | 1       | 1       | 1    |
| NA | NA   | NA   | NA      | NA      | NA      |      |
|    | 0.99 | 0.97 | 0.97    | 0.99    | 0.99    | 0.98 |
|    | 0.79 | 0.77 | 0.78    | 0.92    | 0.91    | 0.79 |
|    | 0.05 | 0.02 | 0.02    | 0.98    | 0.98    | 0.05 |
|    | 0.21 | 0.23 | 0.2     | 0.27    | 0.28    | 0.15 |
|    | 0.84 | 0.97 | 0.96    | 0.82    | 0.66    | 0.83 |
|    | 0.99 | 0.99 | 0.99    | 0.87    | 0.91    | 0.8  |
|    | 0.23 | 0.26 | 0.27    | 0.42    | 0.41    | 0.62 |
|    | 0.99 | 0.99 | 1       | 0.99    | 0.99    | 0.98 |
|    | 0.99 | 0.99 | 1       | 1       | 1       | 1    |
|    | 0.84 | 0.86 | 0.85    | 1       | 1       | 0.83 |
|    | 0.89 | 0.77 | 0.69    | 0.88 NA | NA      |      |
|    | 0.04 | 0.06 | 0.05    | 0.98    | 0.99    | 0.02 |
|    | 0.11 | 0.16 | 0.17    | 0.97    | 0.97    | 0.2  |
|    | 0.3  | 0.21 | 0.25    | 0.59    | 0.68    | 0.47 |
|    | 0.03 | 0.03 | 0.05    | 0.55    | 0.69    | 0.15 |
|    | 0.98 | 0.99 | 0.98    | 0.95    | 0.96    | 0.94 |
|    | 0.98 | 0.99 | 0.99    | 1       | 0.98    | 1    |
|    | 0.31 | 0.42 | 0.31 NA | NA      | NA      |      |
|    | 1    | 1    | 1       | 1       | 1       | 0.94 |
|    | 0.57 | 0.68 | 0.69    | 0.26    | 0.23    | 0.15 |
|    | 0.5  | 0.59 | 0.58    | 0.93    | 1       | 0.39 |
| NA | NA   | NA   | NA      | NA      | NA      |      |
|    | 0.31 | 0.17 | 0.2     | 0.47    | 0.37 NA |      |
|    | 0.3  | 0.63 | 0.54    | 0.98    | 0.98    | 0.22 |
|    | 0.93 | 0.93 | 0.92    | 1       | 1       | 0.95 |
|    | 0.87 | 1    | 1       | 1       | 0.87    | 1    |
|    | 0.24 | 0.37 | 0.38    | 0.99    | 0.99    | 0.12 |
|    | 0.72 | 0.97 | 0.97    | 0.62    | 0.81    | 0.56 |
|    | 0.95 | 0.99 | 0.98    | 0.99    | 0.99    | 0.84 |
|    | 0.29 | 0.23 | 0.3     | 0.33    | 0.3     | 0.3  |
|    | 0.58 | 0.59 | 0.52    | 0.5     | 0.38    | 0.38 |
|    | 0.33 | 0.28 | 0.24    | 0.19    | 0.17    | 0.16 |
|    | 0.97 | 0.98 | 0.97    | 0.89    | 0.88 NA |      |
|    | 0.98 | 0.96 | 0.96    | 0.94    | 0.95    | 0.96 |
|    | 0.77 | 0.85 | 0.87    | 0.88    | 0.9 NA  |      |
|    | 0.97 | 0.97 | 1       | 0.95    | 0.92    | 0.99 |
|    | 0.07 | 0.11 | 0.1     | 0.98    | 0.98    | 0.03 |
|    | 0.16 | 0.14 | 0.13    | 1       | 1       | 0.08 |
|    | 0.06 | 0.05 | 0.04    | 1       | 1       | 0.04 |
|    | 0.3  | 0.67 | 0.55    | 0.83    | 0.72    | 0.67 |
|    | 1    | 1    | 1       | 0.99    | 0.99    | 0.99 |
|    | 1    | 1    | 1       | 0.99    | 0.99    | 0.99 |
|    | 1    | 0.99 | 1       | 0.99    | 0.99    | 0.99 |
|    | 0.56 | 0.95 | 0.79 NA | NA      |         | 0.66 |
|    | 0.97 | 0.97 | 0.97    | 0.97    | 0.97    | 0.93 |
|    | 0.86 | 0.29 | 0.29    | 0.59    | 0.68    | 0.25 |

|      |      |      |      |      |      |
|------|------|------|------|------|------|
| 0.52 | 0.32 | 0.35 | 0.52 | 0.45 | NA   |
| 0.85 | 0.88 | 0.88 | 0.97 | 0.99 | 0.96 |
| 0.22 | 0.22 | 0.29 | NA   | NA   | NA   |
| 0.13 | 0.09 | 0.07 | 0.92 | 0.94 | 0.04 |
| 0.14 | 0.05 | 0.05 | 1    | 1    | 0.19 |
| 0.35 | 0.31 | 0.25 | 0.29 | 0.38 | 0.2  |
| 0.98 | 0.98 | 0.99 | 0.98 | 0.99 | 0.92 |
| 0.06 | 0.11 | 0.1  | 1    | 1    | 0.05 |
| 0.11 | 0.2  | 0.18 | 1    | 1    | 0.05 |
| 0.09 | 0.15 | 0.14 | 1    | 1    | 0.04 |
| 0.98 | 0.95 | 0.95 | 1    | 1    | 0.98 |
| 0.51 | 0.6  | 0.56 | 0.43 | 0.37 | 0.56 |
| 0.26 | 0.28 | 0.27 | 0.29 | 0.27 | 0.26 |
| 0.76 | 0.49 | 0.56 | 0.9  | 0.73 | NA   |
| 1    | 1    | 1    | 1    | 1    | 1    |
| 0.4  | 0.47 | 0.49 | 0.65 | 0.63 | 0.91 |
| 1    | 1    | 1    | 1    | 0.99 | 0.84 |
| 1    | 0.99 | 0.98 | 1    | 1    | 0.97 |
| 0.35 | 0.42 | 0.36 | 0.97 | 0.97 | 0.22 |
| 0.86 | 0.93 | 0.91 | 0.95 | 0.9  | 0.92 |
| 0.98 | 0.98 | 0.98 | 0.96 | 0.95 | 0.98 |
| 0.09 | 0.14 | 0.13 | 0.08 | 0.09 | 0.07 |
| 0.39 | 0.2  | 0.21 | 0.22 | 0.29 | NA   |
| 0.62 | 0.44 | 0.49 | 0.39 | 0.29 | 0.27 |
| 0.33 | 0.28 | 0.27 | 0.97 | 0.97 | 0.25 |
| 0.99 | 0.1  | 0.09 | 1    | 1    | 0.06 |
| 0.91 | 0.72 | 0.89 | 0.7  | 0.79 | 0.43 |
| 0.97 | 0.98 | 0.99 | 1    | 0.98 | 1    |
| 0.48 | 0.24 | 0.2  | 1    | 1    | 0.15 |
| 1    | 1    | 1    | 1    | 1    | 1    |
| 0.96 | 0.96 | 0.89 | 0.91 | 0.83 | 0.91 |
| 0.05 | 0.1  | 0.08 | 0.98 | 0.98 | 0.02 |
| 0.98 | 0.99 | 0.99 | 0.86 | 0.93 | 0.89 |
| NA   | NA   | NA   | NA   | NA   | NA   |
| 0.93 | 0.97 | 0.97 | 0.54 | 0.84 | 0.51 |
| 0.06 | 0.13 | 0.1  | 0.94 | 0.94 | 0.02 |
| 1    | 0.37 | 0.35 | 1    | 1    | 0.24 |
| 0.13 | 0.15 | 0.12 | 0.16 | 0.21 | 0.16 |
| 0.99 | 0.99 | 1    | 0.99 | 0.99 | 0.98 |
| 0.06 | 0.07 | 0.06 | 0.86 | 0.89 | 0.04 |
| 0.98 | 0.99 | 1    | 0.92 | 0.96 | 0.95 |
| 0.63 | 0.67 | 0.66 | 1    | 1    | 0.47 |
| 0.08 | 0.09 | 0.08 | 0.97 | 0.98 | 0.04 |
| 0.4  | 0.38 | 0.41 | 0.79 | 0.79 | 0.53 |
| 1    | 0.99 | 1    | 1    | 1    | 0.97 |
| 0.22 | 0.19 | 0.21 | 0.19 | 0.18 | 0.24 |
| 1    | 0.99 | 0.99 | 0.99 | 0.99 | 0.97 |
| 0.24 | 0.48 | 0.45 | 0.37 | 0.34 | 0.47 |
| 1    | 1    | 1    | 1    | 1    | 1    |



|    |      |      |         |      |         |      |
|----|------|------|---------|------|---------|------|
|    | 0.62 | 0.71 | 0.72    | 0.99 | 1       | 0.76 |
|    | 0.44 | 0.37 | 0.34 NA | NA   |         | 0.1  |
|    | 1    | 1    | 1       | 0.98 | 0.99    | 0.97 |
|    | 0.58 | 0.59 | 0.62    | 1    | 1       | 0.71 |
|    | 0.51 | 0.5  | 0.52    | 0.22 | 0.18    | 0.21 |
|    | 0.99 | 0.99 | 0.98    | 0.99 | 0.99    | 1    |
| NA | NA   | NA   | NA      | NA   | NA      |      |
|    | 0.7  | 0.94 | 0.91    | 0.22 | 0.21    | 0.34 |
| NA |      | 0.92 | 0.92 NA | NA   | NA      |      |
|    | 0.77 | 0.89 | 0.71    | 0.72 | 0.56    | 0.82 |
|    | 0.08 | 0.1  | 0.11    | 1    | 1       | 0.04 |
|    | 0.08 | 0.1  | 0.1     | 0.92 | 0.91    | 0.06 |
|    | 0.62 | 0.71 | 0.61    | 0.73 | 0.79    | 0.75 |
|    | 0.48 | 0.54 | 0.27    | 0.38 | 0.37    | 0.39 |
|    | 0.24 | 0.27 | 0.24    | 0.37 | 0.35    | 0.44 |
|    | 0.98 | 1    | 1       | 0.98 | 0.98 NA |      |
|    | 0.94 | 0.98 | 0.99    | 0.99 | 1       | 0.83 |
|    | 0.14 | 0.18 | 0.18    | 0.97 | 0.98    | 0.1  |
|    | 0.11 | 0.13 | 0.12    | 0.88 | 0.87    | 0.07 |
|    | 0.98 | 0.98 | 0.99    | 0.96 | 0.97 NA |      |
|    | 0.21 | 0.23 | 0.23    | 0.49 | 0.44    | 0.41 |
|    | 0.13 | 0.08 | 0.07    | 1    | 1       | 0.02 |
|    | 1    | 1    | 1       | 1    | 1       | 1    |
|    | 0.07 | 0.06 | 0.05    | 0.98 | 0.98    | 0.04 |
|    | 0.99 | 1    | 1       | 0.99 | 0.99    | 0.99 |
|    | 1    | 1    | 1       | 0.93 | 0.9     | 1    |
|    | 0.18 | 0.21 | 0.18    | 0.21 | 0.29    | 0.27 |
|    | 0.2  | 0.16 | 0.21    | 0.39 | 0.52    | 0.24 |
|    | 0.7  | 0.54 | 0.51    | 1    | 1       | 0.54 |
|    | 0.33 | 0.22 | 0.3     | 0.22 | 0.18    | 0.15 |
|    | 0.23 | 0.14 | 0.14 NA | NA   | NA      |      |
|    | 1    | 1    | 1       | 1    | 1       | 1    |
|    | 0.69 | 0.47 | 0.54    | 0.84 | 0.93    | 0.4  |
|    | 0.97 | 0.97 | 0.97    | 1    | 1       | 1    |
|    | 0.1  | 0.13 | 0.12    | 0.99 | 0.98    | 0.09 |
|    | 0.99 | 0.99 | 1       | 0.93 | 0.9 NA  |      |
|    | 0.5  | 0.22 | 0.21    | 0.68 | 0.72    | 0.89 |
|    | 0.98 | 0.99 | 0.99    | 0.99 | 1       | 0.91 |
|    | 0.46 | 0.2  | 0.17    | 0.99 | 0.99    | 0.2  |
|    | 0.98 | 0.99 | 0.99    | 0.96 | 0.97    | 0.97 |
|    | 0.35 | 0.23 | 0.32 NA | NA   | NA      |      |
|    | 1    | 0.99 | 0.99    | 1    | 1       | 1    |
|    | 0.27 | 0.3  | 0.32    | 0.43 | 0.36    | 0.39 |
|    | 0.09 | 0.14 | 0.11    | 1    | 1       | 0.04 |
|    | 0.13 | 0.3  | 0.25    | 0.99 | 0.99    | 0.09 |
|    | 0.36 | 0.63 | 0.54    | 0.43 | 0.36    | 0.63 |
|    | 0.22 | 0.34 | 0.34    | 1    | 1       | 0.2  |
|    | 0.32 | 0.46 | 0.44    | 0.43 | 0.63    | 0.76 |
|    | 0.15 | 0.22 | 0.14 NA |      | 0.28 NA |      |

|    |      |      |         |         |         |      |
|----|------|------|---------|---------|---------|------|
|    | 0.29 | 0.31 | 0.26    | 0.32    | 0.41    | 0.39 |
|    | 0.08 | 0.08 | 0.08    | 1       | 1       | 0.07 |
|    | 0.65 | 0.6  | 0.63    | 1       | 1       | 0.56 |
|    | 0.07 | 0.08 | 0.07    | 0.99    | 0.99    | 0.12 |
|    | 1    | 1    | 1       | 1       | 0.99    | 0.97 |
|    | 0.97 | 0.98 | 0.98    | 0.99    | 0.99 NA |      |
|    | 0.07 | 0.12 | 0.1     | 0.96    | 0.96    | 0.03 |
| NA | NA   |      | 0.93 NA | NA      | NA      |      |
|    | 0.66 | 0.56 | 0.44 NA | NA      | NA      |      |
|    | 0.1  | 0.09 | 0.08    | 1       | 1       | 0.07 |
|    | 0.98 | 1    | 1       | 1       | 0.96    | 1    |
|    | 0.62 | 0.7  | 0.87 NA |         | 0.47 NA |      |
|    | 0.34 | 0.48 | 0.49    | 0.41 NA |         | 0.53 |
|    | 0.16 | 0.16 | 0.14    | 0.99    | 0.99    | 0.04 |
|    | 0.99 | 1    | 1       | 0.99    | 0.98    | 0.97 |
|    | 0.98 | 0.98 | 0.99 NA | NA      | NA      |      |
|    | 0.97 | 0.16 | 0.08    | 1       | 1       | 0.34 |
|    | 0.29 | 0.21 | 0.17    | 0.19    | 0.19    | 0.23 |
|    | 0.47 | 0.38 | 0.47    | 0.87    | 0.72    | 0.19 |
|    | 0.99 | 0.99 | 0.99    | 0.96    | 0.98    | 0.98 |
|    | 1    | 1    | 1       | 1       | 1       | 1    |
|    | 0.95 | 0.87 | 0.93    | 0.84    | 0.94    | 0.94 |
| NA | NA   | NA   | NA      | NA      | NA      |      |
|    | 0.05 | 0.05 | 0.04    | 0.92    | 0.9     | 0.03 |
|    | 0.37 | 0.37 | 0.26    | 0.78    | 0.66    | 0.48 |
|    | 0.96 | 0.97 | 0.98    | 0.95    | 0.98    | 0.83 |
|    | 0.24 | 0.16 | 0.15    | 0.91    | 0.95    | 0.03 |
|    | 1    | 1    | 1       | 1       | 1       | 1    |
|    | 0.11 | 0.23 | 0.19    | 0.09    | 0.07    | 0.06 |
| NA | NA   | NA   | NA      | NA      | NA      |      |
|    | 0.13 | 0.09 | 0.09    | 1       | 1       | 0.02 |
|    | 0.57 | 0.56 | 0.66    | 0.92    | 0.84    | 0.43 |
|    | 0.18 | 0.28 | 0.25    | 1       | 0.99    | 0.1  |
|    | 0.16 | 0.32 | 0.28    | 0.16    | 0.14    | 0.12 |
|    | 0.87 | 0.71 | 0.69    | 0.63    | 0.69 NA |      |
|    | 0.43 | 0.47 | 0.35    | 0.69    | 0.81    | 0.44 |
|    | 0.99 | 0.99 | 1       | 1       | 1       | 0.99 |
|    | 0.17 | 0.11 | 0.11    | 0.86    | 0.86    | 0.07 |
| NA | NA   | NA   |         | 0.66 NA | NA      |      |
|    | 1    | 1    | 1       | 0.99    | 0.99    | 0.98 |
|    | 0.34 | 0.41 | 0.39    | 0.72    | 0.58    | 0.39 |
|    | 0.22 | 0.19 | 0.13    | 0.11    | 0.17    | 0.13 |
|    | 0.75 | 0.47 | 0.65    | 0.63    | 0.73 NA |      |
|    | 0.27 | 0.46 | 0.31    | 0.42    | 0.49    | 0.28 |
|    | 0.97 | 0.97 | 0.99    | 0.94    | 0.94 NA |      |
|    | 0.98 | 0.88 | 0.95    | 0.92    | 0.96    | 0.97 |
|    | 1    | 1    | 1       | 1       | 0.99    | 0.99 |
|    | 0.95 | 0.99 | 0.98    | 0.99    | 0.99    | 0.84 |
|    | 1    | 1    | 0.99    | 0.99    | 0.99    | 0.99 |

|    |      |         |         |      |         |      |
|----|------|---------|---------|------|---------|------|
|    | 1    | 1       | 1       | 0.99 | 0.97    | 0.98 |
|    | 0.47 | 0.57    | 0.55    | 0.32 | 0.31    | 0.31 |
|    | 0.99 | 0.99    | 0.99    | 0.96 | 0.98    | 0.97 |
|    | 0.35 | 0.13    | 0.14    | 0.17 | 0.2 NA  |      |
|    | 1    | 1       | 1       | 0.99 | 0.98    | 0.98 |
|    | 0.14 | 0.13    | 0.2     | 0.13 | 0.13    | 0.07 |
|    | 0.95 | 0.97    | 0.97    | 0.98 | 0.99    | 0.95 |
|    | 0.98 | 0.99    | 0.98    | 0.98 | 0.97    | 0.99 |
|    | 0.63 | 0.67    | 0.65    | 0.67 | 0.66    | 0.62 |
|    | 0.1  | 0.14    | 0.12    | 1    | 1       | 0.02 |
|    | 0.24 | 0.15    | 0.18    | 0.18 | 0.2     | 0.12 |
|    | 0.3  | 0.38    | 0.43    | 0.32 | 0.33    | 0.36 |
|    | 0.38 | 0.35    | 0.4     | 0.16 | 0.22 NA |      |
|    | 1    | 1       | 1       | 1    | 0.99    | 1    |
|    | 0.52 | 0.48    | 0.46    | 0.81 | 0.68    | 0.52 |
|    | 0.05 | 0.06    | 0.06    | 1    | 1       | 0.05 |
|    | 0.5  | 0.56 NA | NA      | NA   | NA      |      |
|    | 0.98 | 0.98    | 0.99    | 1    | 0.99    | 0.92 |
|    | 0.27 | 0.22    | 0.18 NA | NA   | NA      |      |
|    | 0.04 | 0.07    | 0.06    | 0.94 | 0.93    | 0.04 |
|    | 1    | 1       | 1       | 1    | 1       | 1    |
|    | 0.09 | 0.16    | 0.12    | 0.16 | 0.17    | 0.14 |
|    | 0.86 | 0.38    | 0.55    | 0.45 | 0.44    | 0.33 |
|    | 0.17 | 0.13    | 0.13    | 0.99 | 0.99    | 0.08 |
|    | 0.91 | 0.96    | 0.98    | 0.95 | 0.94 NA |      |
|    | 1    | 1       | 1       | 1    | 1       | 1    |
|    | 0.07 | 0.09    | 0.08    | 0.95 | 0.95    | 0.02 |
|    | 0.64 | 0.83    | 0.9     | 0.86 | 0.68    | 0.64 |
|    | 0.7  | 0.06    | 0.06    | 1    | 1       | 0.99 |
| NA |      | 0.94    | 0.86 NA | NA   | NA      |      |
|    | 0.99 | 0.99    | 0.99    | 1    | 0.99 NA |      |
|    | 0.98 | 0.96    | 0.97    | 0.88 | 0.91 NA |      |
|    | 0.28 | 0.4     | 0.2     | 0.92 | 0.69    | 0.95 |
|    | 0.2  | 0.23    | 0.14    | 0.18 | 0.3     | 0.33 |
|    | 0.72 | 0.87    | 0.81    | 0.45 | 0.4     | 0.64 |
|    | 0.99 | 0.99    | 1       | 0.98 | 0.96    | 0.98 |
| NA |      | 0.94    | 0.97 NA | NA   | NA      |      |
|    | 0.27 | 0.34    | 0.34    | 0.17 | 0.13    | 0.13 |
|    | 0.32 | 0.07    | 0.05    | 0.97 | 0.97    | 0.1  |
|    | 0.05 | 0.07    | 0.06    | 0.62 | 0.68    | 0.07 |
|    | 0.46 | 0.45    | 0.4     | 1    | 1       | 0.34 |
|    | 0.31 | 0.44    | 0.28 NA | NA   |         | 0.18 |
|    | 0.38 | 0.46    | 0.34    | 0.44 | 0.37    | 0.39 |
|    | 0.98 | 0.99    | 0.99    | 0.94 | 0.89 NA |      |
|    | 0.91 | 0.8     | 0.78    | 1    | 1       | 0.55 |
|    | 0.13 | 0.18    | 0.26 NA | NA   | NA      |      |
|    | 0.76 | 0.86    | 0.87    | 1    | 1       | 0.98 |
|    | 0.96 | 0.98    | 0.98    | 0.97 | 0.97    | 0.98 |
| NA | NA   | NA      | NA      | NA   | NA      |      |

|    |      |      |         |      |         |      |
|----|------|------|---------|------|---------|------|
|    | 0.26 | 0.23 | 0.26    | 0.99 | 1       | 1    |
|    | 1    | 1    | 1       | 1    | 1       | 1    |
|    | 0.68 | 0.67 | 0.68    | 0.82 | 0.53    | 0.51 |
|    | 0.99 | 1    | 1       | 0.99 | 0.99    | 1    |
|    | 0.1  | 0.08 | 0.09    | 0.25 | 0.27    | 0.23 |
|    | 0.97 | 0.92 | 0.93    | 0.97 | 0.97    | 0.96 |
|    | 0.08 | 0.04 | 0.03    | 0.7  | 0.98    | 0.05 |
|    | 0.16 | 0.22 | 0.2     | 0.99 | 0.97    | 0.17 |
|    | 0.08 | 0.13 | 0.1     | 1    | 1       | 0.04 |
|    | 0.75 | 0.61 | 0.54    | 0.97 | 0.98    | 0.2  |
|    | 0.61 | 0.21 | 0.15    | 0.96 | 0.95    | 0.05 |
|    | 1    | 1    | 1       | 1    | 1       | 0.98 |
|    | 0.15 | 0.19 | 0.17    | 0.15 | 0.14    | 0.15 |
|    | 0.18 | 0.27 | 0.23    | 0.17 | 0.26    | 0.37 |
|    | 0.68 | 0.76 | 0.66    | 1    | 0.98    | 1    |
|    | 0.21 | 0.3  | 0.37    | 0.36 | 0.36    | 0.29 |
|    | 0.16 | 0.12 | 0.11    | 1    | 1       | 0.08 |
|    | 0.24 | 0.23 | 0.23    | 0.21 | 0.21    | 0.24 |
|    | 0.02 | 0.04 | 0.03    | 0.07 | 0.07    | 0.03 |
|    | 0.99 | 1    | 0.99    | 0.99 | 0.99    | 0.99 |
|    | 0.46 | 0.37 | 0.31 NA | NA   | NA      |      |
|    | 0.14 | 0.06 | 0.05    | 0.99 | 0.99    | 0.1  |
|    | 0.19 | 0.26 | 0.24    | 0.42 | 0.73    | 0.09 |
|    | 0.99 | 0.99 | 0.99    | 0.99 | 0.99    | 0.75 |
|    | 0.14 | 0.18 | 0.13    | 0.2  | 0.19    | 0.19 |
|    | 1    | 0.99 | 0.99    | 1    | 1       | 1    |
|    | 0.52 | 0.47 | 0.39 NA | NA   | NA      |      |
|    | 0.37 | 0.21 | 0.18    | 0.17 | 0.17    | 0.24 |
|    | 0.23 | 0.52 | 0.35    | 0.39 | 0.72    | 0.39 |
|    | 0.49 | 0.08 | 0.06    | 0.98 | 1       | 0.04 |
|    | 0.06 | 0.07 | 0.07    | 1    | 1       | 0.02 |
|    | 0.94 | 0.95 | 0.92    | 1    | 1       | 0.96 |
| NA |      | 0.88 | 0.94 NA | NA   | NA      |      |
|    | 1    | 0.99 | 0.99    | 1    | 0.99    | 1    |
|    | 0.55 | 0.61 | 0.43 NA | NA   | NA      |      |
|    | 0.3  | 0.22 | 0.17    | 0.2  | 0.19 NA |      |
|    | 0.91 | 0.9  | 0.93    | 1    | 1       | 0.69 |
|    | 0.28 | 0.58 | 0.44    | 1    | 1       | 0.05 |
| NA |      | 0.54 | 0.39 NA | NA   | NA      |      |
|    | 0.38 | 0.53 | 0.39 NA | NA   |         | 0.34 |
|    | 0.09 | 0.08 | 0.07    | 0.21 | 0.22    | 0.19 |
|    | 0.89 | 0.91 | 0.89    | 0.88 | 0.9     | 0.73 |
|    | 0.99 | 0.36 | 0.47    | 1    | 1       | 0.83 |
|    | 0.13 | 0.12 | 0.12    | 1    | 1       | 0.06 |
|    | 0.52 | 0.21 | 0.22    | 1    | 1       | 0.2  |
|    | 0.95 | 0.94 | 0.97    | 0.91 | 0.86    | 0.95 |
|    | 0.11 | 0.08 | 0.08    | 1    | 1       | 0.02 |
|    | 0.06 | 0.07 | 0.06    | 1    | 1       | 0.08 |
|    | 0.9  | 0.96 | 0.99    | 0.97 | 0.96    | 0.94 |

|    |      |      |      |      |      |      |
|----|------|------|------|------|------|------|
|    | 0.18 | 0.17 | 0.17 | 0.4  | 0.47 | 0.3  |
|    | 1    | 1    | 1    | 1    | 1    | 1    |
|    | 0.71 | 0.67 | 0.57 | 0.86 | 0.97 | 0.87 |
|    | 0.99 | 1    | 0.99 | 0.98 | 0.98 | 0.99 |
|    | 1    | 1    | 1    | 1    | 1    | 1    |
|    | 0.23 | 0.35 | 0.34 | NA   | NA   | NA   |
|    | 0.69 | 0.47 | 0.54 | 0.84 | 0.93 | 0.4  |
|    | 0.06 | 0.02 | 0.02 | 0.84 | 0.86 | 0.01 |
| NA | NA   | NA   | NA   | NA   | NA   |      |
|    | 0.92 | 0.86 | 0.95 | 1    | 1    | 0.65 |
|    | 0.22 | 0.19 | 0.23 | 0.51 | 0.34 | 0.45 |
|    | 0.84 | 0.89 | 0.72 | 0.77 | 0.85 | 0.85 |
|    | 0.52 | 0.59 | 0.73 | 0.82 | 0.87 | NA   |
| NA |      | 0.65 | 0.64 | NA   | NA   | NA   |
|    | 0.62 | 0.7  | 0.53 | 0.58 | 0.59 | 0.28 |

RAPplus\_1\_rib RAPminus\_1\_ri t0\_1\_riboZero t0\_2\_riboZero t3\_1\_riboZero t3\_2\_riboZero

|    |         |         |      |      |         |      |
|----|---------|---------|------|------|---------|------|
|    | 0.99    | 1       | 1    | 1    | 1       | 1    |
|    | 0.95    | 0.95    | 0.95 | 0.88 | 0.96    | 0.97 |
|    | 0.16    | 0.05    | 0.16 | 0.28 | 0.04    | 0.13 |
|    | 0.08    | 0.04    | 0.07 | 0.1  | 0.04    | 0.09 |
|    | 0.22    | 0.05    | 0.13 | 0.18 | 0.06    | 0.18 |
|    | 0.94    | 0.96    | 0.98 | 0.98 | 0.99    | 0.98 |
|    | 0.75    | 0.8     | 0.88 | 0.79 | 0.87    | 0.9  |
|    | 0.99    | 0.98    | 0.23 | 0.17 | 0.28    | 0.25 |
|    | 0.1     | 0.08    | 0.22 | 0.15 | 0.08    | 0.08 |
|    | 0.4     | 0.7 NA  |      | 0.35 | 0.33    | 0.22 |
|    | 0.98    | 0.99    | 0.99 | 1    | 1       | 0.99 |
| NA | NA      | NA      | NA   | NA   | NA      |      |
|    | 1       | 0.99    | 0.97 | 0.96 | 0.97    | 0.97 |
| NA |         | 0.94    | 0.92 | 0.94 | 0.85    | 0.94 |
|    | 0.2     | 0.12    | 0.34 | 0.44 | 0.11    | 0.2  |
|    | 0.99    | 0.99    | 0.85 | 0.55 | 0.48    | 0.57 |
|    | 1       | 1       | 1    | 1    | 1       | 1    |
|    | 0.21    | 0.07    | 0.12 | 0.17 | 0.04    | 0.09 |
|    | 0.6     | 0.37    | 0.67 | 0.85 | 0.26    | 0.36 |
|    | 0.24    | 0.08    | 0.31 | 0.38 | 0.06    | 0.35 |
|    | 1       | 1       | 0.93 | 0.58 | 0.77    | 0.64 |
|    | 0.08    | 0.04    | 0.14 | 0.21 | 0.04    | 0.22 |
|    | 0.27    | 0.09    | 0.14 | 0.23 | 0.05    | 0.12 |
|    | 0.21    | 0.09    | 0.15 | 0.24 | 0.06    | 0.09 |
|    | 0.16    | 0.07    | 0.14 | 0.2  | 0.04    | 0.13 |
|    | 0.37    | 0.1     | 0.31 | 0.32 | 0.05    | 0.08 |
| NA | NA      |         | 0.24 | 0.23 | 0.17    | 0.19 |
|    | 0.97    | 0.94    | 0.78 | 0.67 | 0.86    | 0.86 |
|    | 0.35    | 0.21    | 0.29 | 0.46 | 0.14    | 0.33 |
|    | 0.12    | 0.05    | 0.08 | 0.14 | 0.05    | 0.11 |
|    | 0.68    | 0.88 NA | NA   |      | 0.76 NA |      |
|    | 0.39    | 0.61    | 0.26 | 0.25 | 0.35 NA |      |
|    | 1       | 1       | 0.99 | 0.99 | 1       | 0.99 |
| NA | NA      | NA      | NA   |      | 0.28    | 0.24 |
|    | 0.25    | 0.09    | 0.27 | 0.32 | 0.11    | 0.47 |
|    | 0.97    | 0.93    | 0.73 | 0.64 | 0.81    | 0.86 |
|    | 0.98    | 0.88    | 0.87 | 0.7  | 0.88    | 0.9  |
|    | 1       | 1       | 1    | 1    | 1       | 1    |
|    | 0.24 NA | NA      | NA   | NA   | NA      |      |
|    | 0.22    | 0.07    | 0.27 | 0.35 | 0.05    | 0.18 |
|    | 0.24    | 0.05    | 0.14 | 0.15 | 0.02    | 0.09 |
|    | 1       | 1       | 1    | 1    | 1       | 1    |
|    | 0.3 NA  |         | 0.21 | 0.14 | 0.16    | 0.13 |
|    | 1       | 1       | 1    | 1    | 1       | 0.99 |
| NA | NA      | NA      | NA   |      | 0.17    | 0.13 |
|    | 0.24    | 0.09    | 0.24 | 0.34 | 0.05    | 0.23 |
|    | 0.63    | 0.51    | 0.58 | 0.52 | 0.67    | 0.84 |

|    |      |      |      |      |      |      |
|----|------|------|------|------|------|------|
|    | 0.96 | 0.8  | 0.94 | 0.92 | 0.48 | 0.35 |
|    | 1    | 1    | 1    | 1    | 1    | 1    |
|    | 0.1  | 0.08 | 0.13 | 0.22 | 0.06 | 0.18 |
| NA | NA   |      | 1    | 1    | 1    | 1    |
|    | 0.12 | 0.08 | 0.1  | 0.1  | 0.06 | 0.12 |
| NA | NA   | NA   | NA   |      | 0.32 | 0.27 |
| NA | NA   | NA   | NA   | NA   | NA   |      |
| NA | NA   | NA   | NA   | NA   | NA   |      |
|    | 0.37 | 0.14 | 0.19 | 0.27 | 0.11 | 0.3  |
|    | 0.34 | 0.74 | NA   | NA   | 0.61 | 0.4  |
|    | 0.13 | 0.04 | 0.17 | 0.25 | 0.03 | 0.12 |
|    | 0.68 | 0.55 | 0.5  | 0.44 | 0.47 | 0.6  |
|    | 0.92 | NA   | 0.93 | 0.97 | 0.95 | 0.91 |
|    | 0.57 | NA   | NA   |      | 0.65 | NA   |
|    | 0.13 | 0.05 | 0.13 | 0.22 | 0.03 | 0.07 |
| NA |      | 0.25 | NA   | 0.76 | 0.22 | 0.2  |
|    | 0.94 | 0.98 | 0.97 | 0.97 | 0.99 | 0.97 |
|    | 0.94 | 0.79 | 0.57 | 0.5  | 0.62 | 0.63 |
|    | 0.99 | 0.99 | 0.99 | 1    | 1    | 0.99 |
|    | 0.83 | 0.75 | 0.78 | 0.9  | 0.48 | 0.79 |
|    | 1    | 1    | 1    | 1    | 1    | 1    |
|    | 0.2  | 0.05 | 0.23 | 0.27 | 0.04 | 0.25 |
| NA | NA   | NA   |      | 0.18 | NA   | NA   |
| NA | NA   | NA   |      | 0.89 | NA   | NA   |
|    | 0.91 | 0.92 | 0.91 | 0.92 | 0.71 | 0.73 |
|    | 0.12 | 0.03 | 0.08 | 0.09 | 0.01 | 0.07 |
|    | 0.91 | 0.89 | 0.88 | 0.79 | 0.9  | NA   |
|    | 0.56 | NA   | NA   | NA   | NA   | NA   |
|    | 0.21 | 0.08 | 0.16 | 0.18 | 0.05 | 0.11 |
|    | 0.91 | NA   | 0.48 | 0.66 | NA   | NA   |
|    | 0.99 | 1    | 0.99 | 0.99 | 0.99 | 0.97 |
|    | 0.58 | NA   | 0.67 | NA   | 0.76 | NA   |
|    | 0.99 | 0.98 | 0.96 | 0.99 | 0.98 | 0.87 |
|    | 0.5  | 0.78 | 0.57 | 0.52 | 0.45 | 0.28 |
|    | 0.22 | 0.23 | 0.25 | 0.16 | 0.24 | 0.29 |
|    | 0.99 | 0.98 | 0.72 | 0.53 | 0.58 | 0.57 |
|    | 0.98 | 0.92 | 0.94 | 0.96 | 0.99 | 0.99 |
|    | 0.34 | 0.33 | 0.27 | 0.29 | 0.3  | 0.25 |
| NA | NA   | NA   | NA   |      | 0.23 | 0.25 |
|    | 0.21 | 0.1  | 0.22 | 0.22 | 0.09 | 0.13 |
|    | 0.18 | 0.09 | 0.19 | 0.32 | 0.08 | 0.16 |
|    | 0.96 | 0.94 | 1    | 0.99 | 0.54 | 0.94 |
|    | 0.29 | NA   | NA   | NA   | 0.22 | NA   |
|    | 0.27 | 0.27 | 0.27 | 0.27 | 0.28 | 0.47 |
|    | 0.96 | 0.98 | 0.97 | 0.95 | 0.96 | 0.94 |
|    | 0.92 | NA   | 0.92 | 0.93 | 0.39 | 0.38 |
| NA | NA   |      | 0.49 | 0.96 | NA   | NA   |
|    | 0.3  | 0.4  | 0.29 | 0.35 | 0.4  | 0.46 |
|    | 0.2  | 0.23 | 0.22 | 0.22 | 0.29 | NA   |

|    |      |      |      |      |      |      |
|----|------|------|------|------|------|------|
|    | 0.35 | 0.36 | 0.32 | 0.51 | 0.17 | 0.21 |
|    | 0.99 | 1    | 0.99 | 0.98 | 0.99 | 0.98 |
| NA | NA   | NA   | NA   | NA   | NA   |      |
|    | 0.96 | 0.98 | 0.97 | 0.98 | 0.98 | 0.97 |
|    | 0.78 | 0.77 | 0.81 | 0.76 | 0.87 | 0.84 |
|    | 0.09 | 0.05 | 0.15 | 0.18 | 0.09 | 0.26 |
|    | 0.21 | 0.22 | 0.25 | NA   | 0.25 | 0.04 |
| NA |      | 0.79 | 0.84 | 0.67 | 0.53 | NA   |
|    | 0.8  | 0.96 | 0.92 | 0.88 | 0.8  | 0.92 |
|    | 0.29 | 0.48 | 0.41 | 0.37 | 0.31 | 0.18 |
|    | 0.99 | 0.99 | 1    | 0.98 | 1    | 1    |
|    | 1    | 1    | 1    | 1    | 1    | 1    |
|    | 0.95 | 0.93 | 0.98 | 0.98 | 0.92 | 0.95 |
| NA | NA   | NA   | NA   | NA   | NA   |      |
|    | 0.06 | 0.03 | 0.05 | 0.05 | 0.01 | 0.05 |
|    | 0.61 | 0.27 | 0.71 | 0.84 | 0.25 | 0.62 |
|    | 0.53 | 0.46 | NA   | NA   | NA   |      |
|    | 0.49 | 0.16 | 0.35 | 0.33 | 0.07 | 0.19 |
|    | 0.84 | 0.91 | 0.69 | 0.81 | 0.7  | 0.58 |
|    | 1    | 1    | 1    | 1    | 1    | 1    |
| NA | NA   | NA   | NA   |      | 0.08 | 0.07 |
|    | 1    | 1    | 0.92 | 0.88 | 0.96 | 0.89 |
|    | 0.35 | 0.16 | 0.19 | 0.27 | 0.22 | 0.19 |
| NA |      | 0.38 | 0.48 | 0.63 | 0.43 | NA   |
| NA | NA   | NA   | NA   |      | 0.09 | 0.15 |
|    | 0.2  | 0.24 | NA   | 0.28 | 0.22 | 0.2  |
|    | 0.17 | 0.27 | 0.29 | 0.25 | 0.14 | 0.16 |
|    | 0.99 | 0.97 | 0.99 | 0.99 | 0.95 | 0.99 |
|    | 1    | 1    | 1    | 1    | 1    | 1    |
|    | 0.25 | 0.17 | 0.46 | 0.66 | 0.19 | 0.35 |
|    | 0.46 | 0.41 | 0.86 | 0.95 | 0.96 | 0.97 |
|    | 0.95 | 0.9  | 0.88 | 0.86 | 0.92 | 0.96 |
|    | 0.32 | 0.18 | 0.37 | 0.44 | 0.26 | 0.17 |
|    | 0.29 | 0.45 | 0.13 | 0.17 | 0.18 | 0.2  |
|    | 0.25 | 0.18 | 0.11 | 0.15 | 0.12 | 0.16 |
|    | 0.99 | NA   | NA   | 0.88 | 0.89 | NA   |
|    | 0.97 | 0.97 | 0.96 | 0.94 | 0.96 | 0.96 |
|    | 0.9  | NA   | NA   |      | 0.95 | 0.92 |
|    | 0.97 | 0.99 | 0.98 | 0.95 | 0.97 | 0.97 |
|    | 0.15 | 0.05 | 0.14 | 0.19 | 0.02 | 0.14 |
|    | 0.48 | 0.15 | 0.32 | 0.56 | 0.1  | 0.42 |
|    | 0.14 | 0.05 | 0.15 | 0.18 | 0.05 | 0.15 |
|    | 0.89 | NA   | NA   | 0.7  | 0.63 | NA   |
|    | 0.99 | 0.99 | 1    | 0.99 | 0.99 | 0.99 |
|    | 0.93 | 0.98 | 0.99 | 0.97 | 0.95 | NA   |
|    | 0.99 | 0.98 | 0.9  | 0.95 | 0.88 | 0.87 |
| NA |      | 0.75 | NA   | NA   | NA   |      |
|    | 0.97 | 0.91 | 0.88 | 0.75 | 0.8  | 0.86 |
|    | 0.17 | 0.14 | 0.15 | 0.14 | 0.07 | 0.12 |



|    |      |      |    |      |      |      |      |
|----|------|------|----|------|------|------|------|
|    | 0.47 | 0.6  | NA | NA   | NA   | NA   |      |
|    | 0.95 | 0.97 |    | 0.73 | 0.97 | 0.99 | 0.97 |
| NA | NA   | NA   | NA | NA   | NA   | NA   |      |
|    | 0.26 | 0.07 |    | 0.27 | 0.4  | 0.05 | 0.35 |
|    | 0.1  | 0.14 |    | 0.09 | 0.11 | 0.06 | 0.06 |
| NA |      | 0.31 | NA | NA   |      | 0.18 | 0.23 |
|    | 0.94 | 0.97 |    | 0.76 | 0.97 | NA   | 0.9  |
|    | 0.21 | 0.09 |    | 0.28 | 0.37 | 0.04 | 0.1  |
|    | 0.3  | 0.08 |    | 0.37 | 0.71 | 0.11 | 0.46 |
|    | 0.14 | 0.07 |    | 0.15 | 0.16 | 0.04 | 0.17 |
|    | 0.98 | 0.99 |    | 0.99 | 0.99 | 0.49 | 0.32 |
|    | 0.51 | 0.48 |    | 0.37 | 0.55 | 0.45 | 0.52 |
|    | 0.22 | 0.22 |    | 0.32 | 0.26 | 0.22 | 0.31 |
|    | 0.67 | NA   | NA | NA   |      | 0.73 | NA   |
|    | 0.98 | 1    |    | 0.99 | 0.99 | 0.99 | 0.97 |
|    | 0.68 | 0.71 |    | 0.54 | 0.81 | 0.39 | 0.28 |
|    | 1    | 0.99 |    | 0.89 | 0.62 | 0.84 | 0.91 |
|    | 0.98 | 0.99 |    | 0.97 | 0.94 | 0.95 | 0.95 |
|    | 0.47 | 0.21 |    | 0.33 | 0.33 | 0.14 | 0.18 |
|    | 0.48 | 0.93 |    | 0.86 | 0.84 | 0.88 | 0.92 |
|    | 0.96 | 0.96 |    | 0.98 | 0.99 | 0.96 | 0.94 |
|    | 0.06 | 0.05 |    | 0.1  | 0.13 | 0.1  | 0.11 |
|    | 0.09 | NA   | NA |      | 0.22 | 0.2  | 0.17 |
|    | 0.53 | 0.41 |    | 0.42 | 0.42 | 0.29 | 0.32 |
|    | 0.37 | 0.27 |    | 0.36 | 0.29 | 0.49 | NA   |
|    | 0.23 | 0.07 |    | 0.21 | 0.32 | 0.06 | 0.14 |
|    | 0.83 | 0.79 |    | 0.94 | 0.94 | 0.76 | 0.7  |
|    | 1    | 1    |    | 1    | 1    | 1    | 1    |
|    | 0.27 | 0.18 |    | 0.31 | 0.34 | 0.16 | 0.35 |
|    | 0.99 | 1    |    | 1    | 1    | 1    | 0.99 |
|    | 0.88 | 0.9  |    | 0.89 | 0.69 | 0.83 | 0.71 |
|    | 0.12 | 0.04 |    | 0.14 | 0.18 | 0.02 | 0.13 |
|    | 0.97 | 0.89 |    | 0.44 | 0.33 | 0.58 | 0.64 |
| NA | NA   | NA   | NA | NA   |      | 0.43 | 0.52 |
|    | 0.4  | 0.78 | NA |      | 0.41 | 0.48 | 0.81 |
|    | 0.13 | 0.04 |    | 0.12 | 0.19 | 0.03 | 0.1  |
|    | 0.96 | 0.27 |    | 0.93 | 0.95 | 0.74 | 0.9  |
|    | 0.13 | 0.16 |    | 0.17 | 0.11 | 0.13 | 0.17 |
|    | 0.98 | 0.99 |    | 1    | 1    | 0.99 | 0.97 |
|    | 0.1  | 0.05 |    | 0.11 | 0.14 | 0.05 | 0.07 |
|    | 0.95 | 0.95 |    | 0.95 | 0.9  | 0.98 | 0.97 |
|    | 0.51 | 0.43 |    | 0.47 | 0.34 | 0.5  | 0.41 |
|    | 0.3  | 0.07 |    | 0.15 | 0.25 | 0.04 | 0.22 |
|    | 0.5  | 0.44 |    | 0.54 | 0.52 | 0.46 | 0.55 |
|    | 0.98 | 0.99 |    | 0.98 | 0.96 | 0.96 | 0.94 |
|    | 0.19 | 0.21 |    | 0.14 | 0.19 | 0.16 | 0.23 |
|    | 0.99 | 0.99 |    | 0.99 | 0.99 | 0.99 | 0.97 |
|    | 0.74 | 0.46 |    | 0.75 | 0.98 | 0.16 | 0.29 |
|    | 0.99 | 1    |    | 1    | 1    | 1    | 0.99 |

|    |         |         |         |         |         |      |
|----|---------|---------|---------|---------|---------|------|
|    | 0.71    | 0.83    | 0.79    | 0.81    | 0.85    | 0.81 |
|    | 0.17 NA |         | 0.08    | 0.07    | 0.06    | 0.08 |
|    | 0.99    | 0.99    | 0.93    | 0.97    | 0.99    | 0.99 |
|    | 0.84    | 0.82    | 0.6     | 0.78    | 0.38    | 0.26 |
|    | 0.29    | 0.32    | 0.28    | 0.28    | 0.19    | 0.15 |
|    | 0.99    | 0.99    | 0.99    | 0.99    | 0.98    | 0.97 |
| NA | NA      | NA      | NA      |         | 0.63    | 0.54 |
|    | 0.27    | 0.2     | 0.3     | 0.28 NA |         | 0.39 |
| NA | NA      | NA      | NA      | NA      | NA      |      |
|    | 0.65 NA | NA      |         | 0.32    | 0.23    | 0.36 |
|    | 0.23    | 0.05    | 0.22    | 0.24    | 0.08    | 0.29 |
|    | 0.32    | 0.07    | 0.24    | 0.37    | 0.05    | 0.24 |
|    | 0.71    | 0.8     | 0.73    | 0.74    | 0.62    | 0.7  |
| NA |         | 0.51 NA |         | 0.29    | 0.19    | 0.36 |
|    | 0.25    | 0.31    | 0.32    | 0.33    | 0.29    | 0.35 |
|    | 0.88    | 0.88 NA | NA      | NA      | NA      |      |
|    | 0.68    | 0.91    | 0.9     | 0.8     | 0.8     | 0.93 |
|    | 0.58    | 0.19    | 0.31    | 0.54    | 0.12    | 0.29 |
|    | 0.15    | 0.08    | 0.11    | 0.14    | 0.07    | 0.1  |
|    | 0.96    | 0.92 NA |         | 0.86    | 0.96    | 0.94 |
|    | 0.37    | 0.33    | 0.33    | 0.48    | 0.24 NA |      |
|    | 0.1     | 0.03    | 0.12    | 0.14    | 0.04    | 0.11 |
|    | 1       | 1       | 1       | 1       | 1       | 0.99 |
|    | 0.09    | 0.07    | 0.12    | 0.21    | 0.02    | 0.13 |
|    | 0.98    | 0.99    | 0.98    | 0.99    | 0.9 NA  |      |
|    | 1       | 1       | 1       | 1       | 1       | 0.99 |
|    | 0.26    | 0.25    | 0.19    | 0.24    | 0.21 NA |      |
|    | 0.1     | 0.16    | 0.14    | 0.14    | 0.22    | 0.17 |
|    | 0.76    | 0.76    | 0.81    | 0.88    | 0.51    | 0.89 |
|    | 0.17    | 0.14    | 0.07    | 0.08    | 0.08    | 0.09 |
| NA | NA      | NA      | NA      | NA      | NA      |      |
|    | 1       | 1       | 1       | 1       | 1       | 1    |
|    | 0.4     | 0.68 NA |         | 0.35    | 0.33    | 0.22 |
|    | 0.99    | 0.99    | 1       | 1       | 0.99    | 0.99 |
|    | 0.34    | 0.1     | 0.22    | 0.23    | 0.08    | 0.21 |
|    | 0.87    | 0.82    | 0.8     | 0.71    | 0.87    | 0.95 |
|    | 0.6     | 0.65 NA | NA      |         | 0.12    | 0.14 |
|    | 0.99    | 0.99    | 0.94    | 0.68    | 0.68    | 0.75 |
|    | 0.7     | 0.26    | 0.67    | 0.77    | 0.31    | 0.55 |
|    | 0.98    | 0.97    | 0.96    | 0.97    | 0.98    | 0.97 |
| NA | NA      | NA      | NA      | NA      | NA      |      |
|    | 1       | 1       | 1       | 1       | 1       | 1    |
|    | 0.47    | 0.36    | 0.52 NA |         | 0.39 NA |      |
|    | 0.2     | 0.07    | 0.12    | 0.14    | 0.02    | 0.18 |
|    | 0.36    | 0.15    | 0.2     | 0.31    | 0.13    | 0.36 |
|    | 0.19    | 0.29    | 0.21    | 0.33    | 0.16 NA |      |
|    | 0.59    | 0.21    | 0.36    | 0.42    | 0.26    | 0.36 |
|    | 0.85    | 0.86 NA |         | 0.84    | 0.87    | 0.92 |
|    | 0.19 NA |         | 0.12    | 0.12    | 0.17    | 0.18 |

|    |         |         |         |         |         |      |
|----|---------|---------|---------|---------|---------|------|
|    | 0.15    | 0.41    | 0.16    | 0.13    | 0.1     | 0.16 |
|    | 0.11    | 0.07    | 0.12    | 0.2     | 0.08    | 0.24 |
|    | 0.57    | 0.55    | 0.62    | 0.76    | 0.57    | 0.71 |
|    | 0.18    | 0.13    | 0.19    | 0.26    | 0.14    | 0.22 |
|    | 1       | 0.99    | 0.97    | 0.97    | 0.98    | 0.97 |
|    | 0.98    | 0.98 NA | NA      |         | 0.29    | 0.35 |
|    | 0.19    | 0.07    | 0.19    | 0.21    | 0.03    | 0.21 |
| NA | NA      | NA      | NA      |         | 0.92    | 0.96 |
| NA | NA      | NA      | NA      | NA      | NA      |      |
|    | 0.15    | 0.08    | 0.16    | 0.16    | 0.06    | 0.12 |
|    | 1       | 1       | 0.79    | 0.46    | 0.57    | 0.5  |
| NA | NA      | NA      | NA      | NA      | NA      |      |
|    | 0.38    | 0.33 NA | NA      | NA      | NA      |      |
|    | 0.33    | 0.07    | 0.17    | 0.24    | 0.03    | 0.09 |
|    | 0.99    | 0.98    | 0.99    | 0.98    | 0.99    | 0.99 |
|    | 0.91 NA | NA      | NA      |         | 0.13    | 0.12 |
|    | 0.43    | 0.37    | 0.34    | 0.41    | 0.21    | 0.31 |
|    | 0.17    | 0.21    | 0.19    | 0.13    | 0.19    | 0.18 |
|    | 0.09    | 0.16    | 0.21    | 0.16    | 0.26    | 0.39 |
|    | 0.96    | 0.98    | 0.98    | 0.96    | 0.98    | 0.97 |
|    | 0.97    | 1       | 1       | 0.99    | 0.99    | 0.94 |
|    | 0.91    | 0.82 NA | NA      |         | 0.87 NA |      |
| NA | NA      | NA      | NA      |         | 0.47    | 0.4  |
|    | 0.15    | 0.04    | 0.14    | 0.15    | 0.04    | 0.1  |
|    | 0.66    | 0.51    | 0.45    | 0.51 NA | NA      |      |
|    | 0.99    | 0.94    | 0.92    | 0.93    | 0.95    | 0.92 |
|    | 0.07    | 0.06    | 0.04    | 0.05    | 0.02    | 0.05 |
|    | 0.99    | 1       | 1       | 1       | 1       | 0.99 |
|    | 0.18    | 0.06    | 0.2     | 0.26 NA | NA      |      |
| NA | NA      | NA      | NA      | NA      | NA      |      |
|    | 0.06    | 0.03    | 0.1     | 0.11    | 0.02    | 0.07 |
|    | 0.81    | 0.88    | 0.07    | 0.08    | 0.16    | 0.08 |
|    | 0.47    | 0.14    | 0.24    | 0.31 NA |         | 0.33 |
|    | 0.08    | 0.09    | 0.09    | 0.05    | 0.08    | 0.05 |
|    | 0.59 NA | NA      |         | 0.45 NA | NA      |      |
|    | 0.39    | 0.45    | 0.59 NA |         | 0.57    | 0.38 |
|    | 1       | 0.99    | 0.99    | 0.99    | 1       | 0.99 |
|    | 0.12    | 0.08    | 0.14    | 0.23    | 0.08    | 0.11 |
|    | 0.41 NA | NA      | NA      |         | 0.44    | 0.42 |
|    | 0.99    | 0.99    | 0.98    | 0.99    | 0.99    | 0.98 |
|    | 0.28    | 0.31    | 0.22    | 0.26    | 0.17    | 0.17 |
|    | 0.14    | 0.14    | 0.17    | 0.19    | 0.06    | 0.14 |
|    | 0.52 NA | NA      |         | 0.37    | 0.33    | 0.36 |
|    | 0.23    | 0.46 NA | NA      |         | 0.29    | 0.32 |
|    | 0.94    | 0.9     | 0.9     | 0.9     | 0.88    | 0.85 |
|    | 0.82    | 0.94    | 0.97    | 0.94    | 0.94 NA |      |
|    | 1       | 0.99    | 1       | 0.99    | 1       | 1    |
|    | 0.96    | 0.92    | 0.88    | 0.87    | 0.92    | 0.95 |
|    | 0.99    | 0.99    | 0.99    | 0.99    | 1       | 0.99 |

|    |         |         |      |         |         |      |
|----|---------|---------|------|---------|---------|------|
|    | 0.99    | 0.99    | 0.98 | 0.98    | 0.99    | 0.99 |
|    | 0.34    | 0.25    | 0.18 | 0.23    | 0.22    | 0.22 |
|    | 0.96    | 0.98    | 0.96 | 0.94    | 0.97    | 0.97 |
|    | 0.13    | 0.15 NA |      | 0.09 NA |         | 0.08 |
|    | 0.99    | 0.99    | 0.99 | 0.99    | 1       | 0.99 |
| NA |         | 0.14 NA | NA   | NA      | NA      |      |
|    | 0.95    | 0.95    | 0.98 | 0.96    | 0.9     | 0.88 |
|    | 0.98    | 0.97    | 0.97 | 0.94    | 0.97    | 0.97 |
|    | 0.72    | 0.63    | 0.69 | 0.44    | 0.51 NA |      |
|    | 0.11    | 0.06    | 0.12 | 0.17    | 0.03    | 0.08 |
|    | 0.08    | 0.19    | 0.12 | 0.11    | 0.12    | 0.14 |
|    | 0.49    | 0.37 NA | NA   | NA      | NA      |      |
|    | 0.12 NA | NA      |      | 0.3 NA  | NA      |      |
|    | 0.99    | 1       | 0.99 | 0.98    | 0.99    | 0.96 |
|    | 0.71    | 0.6     | 0.56 | 0.54    | 0.76    | 0.63 |
|    | 0.46    | 0.09    | 0.16 | 0.33    | 0.03    | 0.19 |
| NA | NA      | NA      | NA   | NA      | NA      |      |
|    | 0.99    | 0.99    | 0.94 | 0.65    | 0.71    | 0.75 |
|    | 0.19 NA |         | 0.15 | 0.11    | 0.14    | 0.1  |
|    | 0.24    | 0.05    | 0.17 | 0.22    | 0.05    | 0.27 |
|    | 1       | 1       | 1    | 1       | 1       | 1    |
|    | 0.19    | 0.15    | 0.11 | 0.12    | 0.11    | 0.18 |
|    | 0.19    | 0.25 NA | NA   |         | 0.15    | 0.23 |
|    | 0.19    | 0.09    | 0.27 | 0.31    | 0.07    | 0.36 |
|    | 0.96    | 0.91    | 0.96 | 0.94    | 0.97    | 0.98 |
|    | 1       | 1       | 0.99 | 1       | 1       | 0.99 |
|    | 0.06    | 0.04    | 0.05 | 0.05    | 0.02    | 0.05 |
|    | 0.6     | 0.67 NA | NA   | NA      | NA      |      |
|    | 1       | 1       | 0.99 | 1       | 1       | 1    |
| NA | NA      | NA      | NA   |         | 0.12    | 0.12 |
|    | 1       | 0.99 NA | NA   | NA      | NA      |      |
|    | 0.71    | 0.81 NA | NA   |         | 0.84    | 0.92 |
|    | 0.63    | 0.87 NA | NA   | NA      | NA      |      |
|    | 0.29 NA |         | 0.21 | 0.2     | 0.26    | 0.25 |
|    | 0.5     | 0.44 NA | NA   |         | 0.32    | 0.35 |
|    | 0.97    | 0.99    | 0.96 | 0.97    | 0.98    | 0.96 |
|    | 0.92 NA | NA      | NA   |         | 0.45    | 0.4  |
| NA |         | 0.14 NA | NA   | NA      | NA      |      |
|    | 0.11    | 0.08    | 0.13 | 0.22    | 0.09    | 0.16 |
|    | 0.14    | 0.05    | 0.15 | 0.21    | 0.14    | 0.25 |
|    | 0.28    | 0.47    | 0.2  | 0.19    | 0.2     | 0.23 |
| NA | NA      | NA      | NA   | NA      | NA      |      |
|    | 0.32    | 0.43    | 0.3  | 0.2     | 0.3 NA  |      |
| NA |         | 0.92 NA | NA   |         | 0.21    | 0.2  |
|    | 0.67    | 0.57    | 0.72 | 0.44    | 0.81    | 0.8  |
| NA | NA      | NA      | NA   | NA      | NA      |      |
|    | 0.97    | 0.98    | 0.97 | 0.96    | 0.98    | 0.97 |
|    | 0.98    | 0.98    | 0.95 | 0.96    | 0.99    | 0.99 |
| NA | NA      | NA      |      | 0.51 NA | NA      |      |

|    |         |         |      |         |      |      |
|----|---------|---------|------|---------|------|------|
|    | 0.98    | 1       | 0.97 | 0.99    | 0.98 | 0.81 |
|    | 1       | 1       | 1    | 1       | 1    | 0.99 |
|    | 0.83    | 0.81    | 0.48 | 0.48    | 0.47 | 0.46 |
|    | 0.99    | 0.99    | 0.99 | 1       | 1    | 1    |
|    | 0.13    | 0.14    | 0.15 | 0.38    | 0.22 | 0.13 |
|    | 0.96    | 0.95    | 0.96 | 0.97    | 0.98 | 0.94 |
|    | 0.04    | 0.05    | 0.06 | 0.09    | 0.05 | 0.05 |
|    | 0.34    | 0.17    | 0.31 | 0.37    | 0.12 | 0.53 |
|    | 0.21    | 0.05    | 0.23 | 0.31    | 0.05 | 0.15 |
|    | 0.75    | 0.28    | 0.54 | 0.6     | 0.17 | 0.27 |
|    | 0.26    | 0.08    | 0.25 | 0.51    | 0.08 | 0.24 |
|    | 0.95    | 0.99    | 0.98 | 0.99    | 0.98 | 0.97 |
|    | 0.12    | 0.12    | 0.13 | 0.15    | 0.14 | 0.13 |
| NA | NA      | NA      | NA   |         | 0.13 | 0.13 |
|    | 1       | 1       | 1    | 1       | 1    | 1    |
| NA |         | 0.33 NA |      | 0.32 NA | NA   |      |
|    | 0.14    | 0.1     | 0.13 | 0.14    | 0.06 | 0.17 |
|    | 0.22    | 0.22    | 0.25 | 0.24    | 0.25 | 0.26 |
|    | 0.11    | 0.04    | 0.17 | 0.27    | 0.03 | 0.07 |
|    | 0.99    | 0.99    | 0.96 | 0.98    | 0.98 | 0.98 |
| NA | NA      | NA      | NA   | NA      | NA   |      |
|    | 0.24    | 0.14    | 0.29 | 0.4 NA  |      | 0.8  |
|    | 0.08    | 0.08    | 0.08 | 0.1     | 0.08 | 0.1  |
|    | 0.99    | 0.99    | 0.82 | 0.53    | 0.48 | 0.57 |
|    | 0.13    | 0.11    | 0.13 | 0.13    | 0.14 | 0.07 |
|    | 1       | 1       | 1    | 1       | 1    | 1    |
| NA | NA      | NA      | NA   | NA      | NA   |      |
|    | 0.08    | 0.12    | 0.16 | 0.14    | 0.17 | 0.21 |
|    | 0.45    | 0.79 NA | NA   | NA      | NA   |      |
|    | 0.17    | 0.06    | 0.09 | 0.14    | 0.03 | 0.11 |
|    | 0.07    | 0.03    | 0.09 | 0.15    | 0.02 | 0.15 |
|    | 0.97    | 0.97    | 0.98 | 0.94    | 0.98 | 0.97 |
| NA | NA      | NA      | NA   |         | 0.36 | 0.33 |
|    | 1       | 1       | 0.99 | 0.99    | 1    | 0.99 |
| NA | NA      | NA      | NA   | NA      | NA   |      |
|    | 0.08 NA |         | 0.07 | 0.08    | 0.14 | 0.14 |
|    | 0.6     | 0.67    | 0.84 | 0.92    | 0.85 | 0.65 |
|    | 0.15    | 0.05    | 0.26 | 0.21    | 0.04 | 0.17 |
| NA | NA      | NA      | NA   | NA      | NA   |      |
|    | 0.23 NA | NA      | NA   |         | 0.52 | 0.86 |
|    | 0.21    | 0.21    | 0.25 | 0.34    | 0.18 | 0.22 |
|    | 0.85    | 0.88    | 0.72 | 0.91    | 0.71 | 0.91 |
|    | 1       | 0.97    | 1    | 1       | 1    | 1    |
|    | 0.31    | 0.09    | 0.21 | 0.37    | 0.11 | 0.63 |
|    | 0.53    | 0.17    | 0.93 | 0.63    | 0.19 | 0.48 |
|    | 0.88    | 0.95    | 0.95 | 0.97    | 0.93 | 0.9  |
|    | 0.19    | 0.04    | 0.13 | 0.11    | 0.01 | 0.08 |
|    | 0.43    | 0.11    | 0.16 | 0.26    | 0.06 | 0.15 |
|    | 0.97    | 0.95    | 0.97 | 0.96    | 0.94 | 0.97 |

|    |      |         |      |         |         |      |
|----|------|---------|------|---------|---------|------|
|    | 0.28 | 0.33    | 0.15 | 0.19    | 0.12    | 0.18 |
|    | 1    | 1       | 1    | 1       | 1       | 0.99 |
|    | 0.89 | 0.9 NA  |      | 0.78 NA | NA      |      |
|    | 0.98 | 0.97    | 0.99 | 0.99    | 0.99    | 0.98 |
|    | 1    | 1       | 1    | 1       | 0.99    | 0.99 |
| NA | NA   | NA      | NA   |         | 0.16    | 0.12 |
|    | 0.4  | 0.69 NA |      | 0.35    | 0.33    | 0.22 |
|    | 0.07 | 0.02    | 0.05 | 0.06    | 0.01    | 0.04 |
| NA | NA   | NA      |      | 0.91    | 0.9     | 0.82 |
|    | 0.63 | 0.66    | 0.62 | 0.7     | 0.62    | 0.45 |
|    | 0.38 | 0.29    | 0.32 | 0.46 NA | NA      |      |
|    | 0.71 | 0.56    | 0.57 | 0.47    | 0.67    | 0.7  |
|    | 0.65 | 0.89 NA | NA   |         | 0.29 NA |      |
| NA | NA   | NA      | NA   |         | 0.6     | 0.59 |
|    | 0.79 | 0.51    | 0.72 | 0.57    | 0.79    | 0.88 |

|    | t6_1_riboZero | t6_2_riboZero | t7.5_1_riboZe | t7.5_2_riboZe | t8.5_1_riboZe | t8.5_2_riboZe |
|----|---------------|---------------|---------------|---------------|---------------|---------------|
|    | 1             | 1             | NA            | NA            | NA            | NA            |
|    | 0.94          | 0.97          | 0.9           | 0.89          | 0.94          | 0.94          |
|    | 0.09          | 0.09          | 0.1           | 0.09          | 0.12          | 0.23          |
|    | 0.14          | 0.11          | NA            | NA            | NA            | NA            |
|    | 0.16          | 0.16          | 0.21          | 0.31          | 0.4           | 0.68          |
|    | 0.98          | 0.99          | 0.98          | 0.98          | 0.99          | 0.99          |
|    | 0.84          | 0.92          | NA            | 0.66          | 0.47          | NA            |
|    | 0.35          | 0.28          | 0.25          | 0.28          | 0.27          | 0.21          |
|    | 0.08          | 0.06          | 0.27          | 0.23          | 0.37          | 0.38          |
|    | 0.32          | 0.22          | 0.27          | 0.31          | 0.29          | 0.16          |
|    | 0.99          | 1             | 0.99          | 1             | 0.99          | 0.99          |
| NA | NA            |               | 0.98          | 0.99          | 0.96          | 0.98          |
|    | 0.97          | 0.97          | 0.98          | 0.95          | 0.96          | 0.98          |
|    | 0.91          | 0.97          | NA            | NA            | NA            | NA            |
|    | 0.22          | 0.2           | 0.08          | 0.06          | 0.17          | 0.12          |
|    | 0.57          | 0.62          | 0.92          | 0.7           | 0.79          | 0.92          |
|    | 1             | 1             | 1             | 1             | 1             | 1             |
|    | 0.07          | 0.05          | NA            | NA            | NA            | NA            |
|    | 0.35          | 0.37          | 0.19          | 0.21          | 0.17          | 0.46          |
|    | 0.2           | 0.16          | NA            | NA            | NA            | NA            |
|    | 0.73          | 0.93          | 1             | 1             | 1             | 1             |
|    | 0.07          | 0.05          | 0.07          | 0.05          | NA            | 0.18          |
|    | 0.08          | 0.07          | 0.12          | 0.05          | NA            | NA            |
|    | 0.1           | 0.05          | NA            | NA            | NA            | NA            |
|    | 0.12          | 0.08          | 0.37          | NA            | NA            | 0.44          |
|    | 0.1           | 0.08          | 0.4           | 0.65          | 0.65          | 0.54          |
|    | 0.16          | 0.22          | 0.22          | 0.09          | 0.21          | 0.22          |
|    | 0.92          | 0.85          | 0.85          | 0.8           | 0.94          | 0.96          |
|    | 0.18          | 0.11          | 0.3           | 0.16          | NA            | 0.32          |
|    | 0.07          | 0.05          | 0.06          | 0.05          | NA            | NA            |
|    | 0.93          | 0.94          | NA            | 0.93          | NA            | NA            |
|    | 0.41          | 0.44          | NA            | NA            | NA            | 0.49          |
|    | 0.99          | 0.99          | 0.99          | 0.99          | 0.99          | 0.99          |
|    | 0.19          | 0.28          | 0.84          | 0.83          | 0.77          | 0.92          |
|    | 0.18          | 0.18          | 0.39          | NA            | NA            | NA            |
|    | 0.82          | 0.91          | 0.83          | 0.96          | 0.98          | 0.92          |
|    | 0.62          | 0.64          | 0.5           | 0.39          | 0.54          | 0.62          |
|    | 1             | 1             | 1             | 1             | 1             | 1             |
| NA | NA            | NA            | NA            | NA            | NA            | NA            |
|    | 0.1           | 0.1           | 0.14          | NA            | NA            | NA            |
|    | 0.05          | 0.07          | 0.12          | 0.08          | NA            | NA            |
|    | 1             | 1             | 1             | 1             | 1             | 1             |
|    | 0.17          | 0.19          | 0.19          | 0.15          | 0.2           | 0.19          |
|    | 0.99          | 1             | 0.99          | 0.98          | 0.97          | 0.98          |
|    | 0.11          | 0.15          | 0.17          | 0.15          | 0.28          | 0.26          |
|    | 0.14          | 0.22          | 0.17          | 0.32          | 0.22          | NA            |
|    | 0.65          | 0.71          | 0.99          | 0.99          | 0.93          | 0.88          |

|    |         |         |         |         |         |      |
|----|---------|---------|---------|---------|---------|------|
|    | 0.39    | 0.39    | 0.35    | 0.34    | 0.5     | 0.45 |
|    | 1       | 1       | 1       | 1       | 1       | 1    |
|    | 0.09    | 0.13 NA |         | 0.15 NA | NA      |      |
|    | 1       | 0.99    | 0.96    | 0.99    | 0.98    | 0.97 |
|    | 0.07    | 0.07    | 0.08    | 0.12    | 0.11    | 0.09 |
|    | 0.19    | 0.3     | 0.36    | 0.34    | 0.37    | 0.37 |
| NA |         | 0.22    | 0.23    | 0.19    | 0.18    | 0.21 |
|    | 0.35 NA | NA      | NA      | NA      | NA      |      |
|    | 0.1     | 0.13 NA | NA      | NA      | NA      |      |
|    | 0.57    | 0.33 NA | NA      | NA      | NA      |      |
|    | 0.17    | 0.12    | 0.19    | 0.11    | 0.11    | 0.3  |
|    | 0.44    | 0.53    | 0.91    | 0.88    | 0.73    | 0.87 |
|    | 0.92    | 0.95    | 0.9     | 0.91    | 0.96    | 0.96 |
|    | 0.23    | 0.2     | 0.22    | 0.19    | 0.31    | 0.32 |
|    | 0.08    | 0.05    | 0.05    | 0.11    | 0.02    | 0.05 |
|    | 0.37    | 0.27    | 0.15    | 0.17    | 0.09    | 0.1  |
|    | 0.97    | 0.99    | 0.98    | 0.99    | 0.99    | 0.99 |
|    | 0.57    | 0.65    | 0.66    | 0.91    | 0.8     | 0.67 |
|    | 0.98    | 0.99    | 0.98    | 1       | 0.99    | 0.99 |
|    | 0.59    | 0.49 NA | NA      | NA      | NA      |      |
|    | 1       | 1       | 0.99    | 0.99 NA | NA      |      |
|    | 0.1     | 0.13    | 0.18    | 0.17 NA | NA      |      |
|    | 0.12    | 0.06 NA | NA      | NA      | NA      |      |
|    | 0.38    | 0.26 NA | NA      | NA      | NA      |      |
|    | 0.71    | 0.78    | 0.76    | 0.74    | 0.64    | 0.57 |
|    | 0.04    | 0.03 NA | NA      | NA      | NA      |      |
| NA |         | 0.72 NA | NA      | NA      | NA      |      |
|    | 0.33    | 0.51 NA | NA      | NA      | NA      |      |
|    | 0.08    | 0.05    | 0.05 NA | NA      | NA      |      |
|    | 0.91    | 0.96    | 0.96    | 0.71    | 0.89    | 0.96 |
|    | 0.98    | 0.99    | 0.96    | 0.97    | 0.95    | 0.92 |
| NA | NA      | NA      | NA      | NA      | NA      |      |
|    | 0.96    | 0.97    | 0.9     | 0.96    | 0.81    | 0.66 |
|    | 0.35    | 0.33    | 0.62 NA | NA      | NA      |      |
|    | 0.28    | 0.26    | 0.18 NA |         | 0.34 NA |      |
|    | 0.62    | 0.52    | 0.64    | 0.62    | 0.63    | 0.81 |
|    | 0.99    | 0.99    | 0.98    | 1       | 0.99    | 0.98 |
|    | 0.38    | 0.29    | 0.5     | 0.48    | 0.4     | 0.3  |
|    | 0.24    | 0.25 NA | NA      | NA      | NA      |      |
|    | 0.11    | 0.12 NA | NA      | NA      | NA      |      |
|    | 0.11    | 0.11    | 0.17    | 0.06    | 0.17 NA |      |
|    | 0.96    | 0.98    | 0.86    | 0.94    | 0.87    | 0.9  |
|    | 0.33    | 0.34 NA | NA      | NA      | NA      |      |
|    | 0.61    | 0.51    | 0.57    | 0.57    | 0.48    | 0.38 |
|    | 0.93    | 0.97 NA |         | 0.92 NA | NA      |      |
|    | 0.31    | 0.42    | 0.32    | 0.35    | 0.31    | 0.32 |
| NA |         | 0.3 NA  |         | 0.37 NA | NA      |      |
|    | 0.54    | 0.55 NA | NA      | NA      | NA      |      |
|    | 0.31    | 0.3     | 0.4 NA  | NA      | NA      |      |



|    |      |         |         |         |         |      |
|----|------|---------|---------|---------|---------|------|
|    | 0.34 | 0.3     | 0.29    | 0.22    | 0.2     | 0.2  |
|    | 0.97 | 0.98    | 0.95    | 0.95    | 0.93    | 0.92 |
| NA |      | 0.2 NA  | NA      | NA      | NA      |      |
|    | 0.97 | 0.97    | 0.88 NA |         | 0.94 NA |      |
|    | 0.79 | 0.86    | 0.92    | 0.95    | 0.9     | 0.89 |
|    | 0.11 | 0.12    | 0.29    | 0.23    | 0.26    | 0.39 |
|    | 0.13 | 0.08    | 0.86    | 0.83    | 0.37    | 0.43 |
|    | 0.47 | 0.49 NA |         | 0.46 NA |         | 0.48 |
|    | 0.8  | 0.63 NA |         | 0.8     | 0.82    | 0.57 |
|    | 0.32 | 0.39 NA | NA      | NA      | NA      |      |
|    | 0.99 | 1       | 0.99    | 0.99    | 0.99    | 0.99 |
|    | 1    | 1       | 0.99    | 0.99    | 0.99    | 0.99 |
|    | 0.86 | 0.92    | 0.72    | 0.92 NA |         | 0.94 |
| NA | NA   | NA      | NA      | NA      | NA      |      |
|    | 0.02 | 0.02    | 0.04    | 0.04    | 0.06    | 0.11 |
|    | 0.4  | 0.4     | 0.27 NA | NA      | NA      |      |
| NA |      | 0.4     | 0.86    | 0.9     | 0.85    | 0.86 |
|    | 0.27 | 0.29    | 0.42    | 0.5     | 0.79    | 0.89 |
|    | 0.68 | 0.39    | 0.43    | 0.62    | 0.52    | 0.47 |
|    | 1    | 1       | 1       | 1       | 1       | 1    |
|    | 0.07 | 0.08    | 0.35    | 0.21    | 0.26    | 0.27 |
|    | 0.93 | 0.94    | 0.99    | 0.97    | 0.99    | 0.98 |
|    | 0.34 | 0.46 NA | NA      | NA      | NA      |      |
| NA | NA   |         | 0.87 NA | NA      | NA      |      |
|    | 0.19 | 0.19 NA | NA      | NA      | NA      |      |
|    | 0.34 | 0.55    | 0.49    | 0.62    | 0.36    | 0.41 |
|    | 0.27 | 0.18 NA | NA      | NA      | NA      |      |
|    | 0.96 | 0.97    | 0.98    | 0.98    | 0.98    | 0.96 |
|    | 1    | 1       | 1       | 1       | 1       | 1    |
|    | 0.27 | 0.3     | 0.5     | 0.81 NA |         | 0.34 |
|    | 0.78 | 0.77    | 0.6     | 0.37    | 0.54    | 0.55 |
|    | 0.96 | 0.97    | 0.94    | 0.98    | 0.99    | 0.97 |
|    | 0.3  | 0.26    | 0.18    | 0.21 NA | NA      |      |
|    | 0.19 | 0.16    | 0.37 NA |         | 0.77    | 0.63 |
|    | 0.11 | 0.09    | 0.1     | 0.06    | 0.21    | 0.17 |
|    | 0.96 | 0.95    | 1       | 0.86    | 1       | 1    |
|    | 0.95 | 0.96    | 0.99    | 1       | 1       | 1    |
|    | 0.96 | 0.98 NA | NA      | NA      | NA      |      |
|    | 0.99 | 0.99    | 0.95 NA | NA      | NA      |      |
|    | 0.07 | 0.05    | 0.08    | 0.06 NA | NA      |      |
|    | 0.23 | 0.22 NA | NA      | NA      | NA      |      |
|    | 0.06 | 0.06    | 0.09    | 0.06 NA | NA      |      |
|    | 0.33 | 0.53 NA |         | 0.35 NA | NA      |      |
|    | 0.99 | 1       | 0.95    | 0.96    | 0.57    | 0.59 |
|    | 0.97 | 0.97 NA | NA      | NA      | NA      |      |
|    | 0.74 | 0.86    | 0.96    | 0.78    | 0.94    | 0.95 |
| NA | NA   | NA      | NA      | NA      | NA      |      |
|    | 0.95 | 0.92    | 0.91    | 0.88 NA |         | 0.89 |
|    | 0.11 | 0.1     | 0.11    | 0.06    | 0.09    | 0.12 |

|    |      |         |         |         |         |      |
|----|------|---------|---------|---------|---------|------|
| NA | NA   | NA      | NA      | NA      | NA      | NA   |
|    | 0.96 | 0.95    | 0.94    | 0.97    | 0.98    | 0.93 |
| NA | NA   |         | 0.07    | 0.05    | 0.06    | 0.07 |
|    | 0.23 | 0.21    | 0.22    | 0.22    | 0.14    | 0.24 |
|    | 0.06 | 0.06    | 0.06    | 0.04    | 0.06    | 0.06 |
|    | 0.24 | 0.28 NA | NA      |         | 0.29    | 0.3  |
|    | 0.88 | 0.83    | 0.89    | 0.88 NA | NA      |      |
|    | 0.1  | 0.06    | 0.06    | 0.08 NA | NA      |      |
|    | 0.3  | 0.28    | 0.44    | 0.38 NA | NA      |      |
|    | 0.09 | 0.06 NA | NA      | NA      | NA      |      |
|    | 0.54 | 0.49    | 0.74 NA | NA      | NA      |      |
|    | 0.52 | 0.37 NA |         | 0.29    | 0.48 NA |      |
|    | 0.23 | 0.23    | 0.24    | 0.26    | 0.24    | 0.44 |
|    | 0.85 | 0.78 NA | NA      | NA      | NA      |      |
|    | 0.99 | 0.99    | 0.95    | 0.98    | 0.95 NA |      |
|    | 0.47 | 0.29 NA | NA      | NA      | NA      |      |
|    | 0.95 | 0.98    | 1       | 0.97    | 0.99    | 1    |
|    | 0.93 | 0.95    | 0.64    | 0.47    | 0.61    | 0.71 |
|    | 0.29 | 0.3     | 0.39    | 0.31    | 0.24    | 0.28 |
|    | 0.85 | 0.93    | 0.9     | 0.54    | 0.86    | 0.92 |
|    | 0.97 | 0.96    | 0.86 NA | NA      | NA      |      |
|    | 0.15 | 0.1 NA  |         | 0.35 NA | NA      |      |
|    | 0.14 | 0.13    | 0.41    | 0.72 NA |         | 0.46 |
|    | 0.3  | 0.25    | 0.52    | 0.57    | 0.53    | 0.73 |
|    | 0.48 | 0.5     | 0.4     | 0.55 NA | NA      |      |
|    | 0.11 | 0.12    | 0.19    | 0.21    | 0.33    | 0.32 |
|    | 0.63 | 0.88 NA | NA      | NA      | NA      |      |
|    | 1    | 1       | 1       | 1       | 1       | 1    |
|    | 0.42 | 0.43    | 0.53    | 0.51 NA |         | 0.45 |
|    | 1    | 1 NA    | NA      | NA      | NA      |      |
|    | 0.78 | 0.81    | 0.87    | 0.85    | 0.87    | 0.82 |
|    | 0.05 | 0.04    | 0.07    | 0.1 NA  | NA      |      |
|    | 0.77 | 0.85    | 0.46    | 0.46    | 0.74    | 0.64 |
|    | 0.47 | 0.52    | 0.69    | 0.52    | 0.46    | 0.59 |
|    | 0.54 | 0.46 NA | NA      | NA      | NA      |      |
|    | 0.07 | 0.05    | 0.15    | 0.1 NA  | NA      |      |
|    | 0.76 | 0.82    | 0.89    | 0.76    | 0.84    | 0.51 |
|    | 0.12 | 0.18    | 0.22    | 0.17    | 0.24    | 0.21 |
|    | 0.98 | 0.99    | 0.99    | 0.99    | 0.99    | 0.99 |
|    | 0.05 | 0.07    | 0.06    | 0.05 NA | NA      |      |
|    | 0.98 | 0.99    | 0.98    | 0.99    | 0.99    | 0.99 |
|    | 0.38 | 0.58    | 0.94 NA |         | 0.88 NA |      |
|    | 0.2  | 0.15    | 0.24    | 0.36 NA | NA      |      |
|    | 0.5  | 0.55    | 0.61    | 0.48 NA | NA      |      |
|    | 0.9  | 0.95    | 0.85    | 0.91    | 0.83    | 0.67 |
|    | 0.26 | 0.2     | 0.08    | 0.03    | 0.13    | 0.11 |
|    | 0.98 | 0.99    | 0.99    | 0.99    | 0.99    | 1    |
|    | 0.43 | 0.38    | 0.38    | 0.61 NA | NA      |      |
|    | 1    | 1       | 0.99    | 0.99    | 0.97    | 0.98 |

|    |      |      |      |      |      |      |   |
|----|------|------|------|------|------|------|---|
|    | 0.67 | 0.78 | 0.89 | NA   | NA   | NA   |   |
|    | 0.07 | 0.1  | NA   | NA   | NA   | NA   |   |
|    | 1    | 1    | 1    | 1    | 1    | 1    | 1 |
|    | 0.25 | 0.25 | 0.39 | 0.37 | 0.47 | 0.49 |   |
|    | 0.07 | 0.17 | 0.1  | 0.05 | 0.05 | 0.05 |   |
|    | 0.99 | 0.99 | 0.98 | 0.96 | 0.99 | 0.99 |   |
|    | 0.87 | 0.62 | 0.74 | 0.37 | NA   | NA   |   |
| NA |      | 0.6  | NA   | NA   | NA   | NA   |   |
| NA | NA   |      | 0.22 | 0.21 | 0.14 | 0.15 |   |
|    | 0.34 | 0.44 | 0.98 | 0.83 | 0.96 | 0.98 |   |
|    | 0.31 | 0.3  | 0.68 | 0.48 | 0.86 | 0.92 |   |
|    | 0.11 | 0.09 | NA   | 0.2  | NA   | NA   |   |
|    | 0.69 | 0.7  | 0.41 | 0.38 | 0.42 | 0.4  |   |
|    | 0.15 | 0.18 | NA   | NA   | NA   | NA   |   |
|    | 0.25 | 0.26 | 0.43 | 0.4  | 0.58 | 0.36 |   |
| NA |      | 0.81 | 0.9  | 0.96 | 0.89 | 0.9  |   |
|    | 0.93 | 0.93 | 0.94 | 0.94 | 0.73 | 0.79 |   |
|    | 0.3  | 0.24 | NA   | NA   | NA   | NA   |   |
|    | 0.08 | 0.06 | 0.07 | 0.08 | 0.07 | 0.07 |   |
|    | 0.92 | 0.95 | NA   | NA   | NA   | NA   |   |
|    | 0.29 | 0.15 | NA   | 0.12 | 0.12 | 0.1  |   |
|    | 0.19 | 0.22 | 0.16 | 0.23 | NA   | 0.29 |   |
|    | 0.99 | 1    | 0.98 | 0.95 | 0.93 | 0.94 |   |
|    | 0.07 | 0.04 | 0.11 | 0.1  | 0.19 | NA   |   |
|    | 0.93 | 0.9  | NA   | NA   | NA   | NA   |   |
|    | 0.99 | 1    | 0.98 | 0.99 | 0.98 | 0.97 |   |
|    | 0.24 | 0.37 | NA   | NA   | NA   | NA   |   |
|    | 0.21 | 0.23 | NA   | NA   | NA   | NA   |   |
|    | 0.79 | 0.75 | NA   | NA   | NA   | NA   |   |
|    | 0.09 | 0.09 | 0.11 | 0.08 | 0.06 | 0.1  |   |
| NA | NA   | NA   | NA   | NA   | NA   | NA   |   |
|    | 1    | 1    | 1    | 1    | 1    | 1    |   |
|    | 0.32 | 0.22 | 0.27 | 0.32 | 0.29 | 0.16 |   |
|    | 0.99 | 0.99 | 0.97 | 0.99 | 0.97 | 0.97 |   |
|    | 0.14 | 0.18 | NA   | 0.15 | 0.47 | NA   |   |
|    | 0.88 | 0.96 | 0.82 | 0.77 | 0.83 | 0.73 |   |
|    | 0.2  | 0.2  | NA   | NA   | NA   | NA   |   |
|    | 0.79 | 0.87 | 0.88 | 0.77 | 0.88 | 0.95 |   |
|    | 0.41 | 0.23 | 0.51 | 0.46 | NA   | NA   |   |
|    | 0.97 | 0.96 | 0.99 | 0.99 | 0.99 | 0.99 |   |
| NA | NA   | NA   | NA   | NA   | NA   | NA   |   |
|    | 1    | 1    | 1    | 1    | 1    | 1    |   |
|    | 0.32 | 0.47 | NA   | NA   | NA   | NA   |   |
|    | 0.07 | 0.07 | NA   | NA   | NA   | NA   |   |
|    | 0.25 | 0.23 | 0.32 | 0.29 | NA   | NA   |   |
|    | 0.18 | 0.13 | 0.17 | 0.14 | 0.12 | 0.14 |   |
|    | 0.44 | 0.42 | NA   | NA   | NA   | NA   |   |
|    | 0.89 | 0.77 | NA   | NA   | NA   | NA   |   |
| NA |      | 0.12 | 0.11 | 0.11 | NA   | 0.11 |   |

|    |         |         |         |         |         |      |
|----|---------|---------|---------|---------|---------|------|
| NA |         | 0.17    | 0.16    | 0.1     | 0.09    | 0.08 |
|    | 0.1     | 0.13 NA |         | 0.1 NA  | NA      |      |
|    | 0.68    | 0.66    | 0.77    | 0.88    | 0.84    | 0.7  |
|    | 0.22    | 0.15    | 0.15    | 0.21 NA |         | 0.23 |
|    | 0.96    | 0.94    | 0.97    | 0.95    | 0.97    | 0.95 |
|    | 0.3     | 0.39 NA | NA      | NA      | NA      |      |
|    | 0.12    | 0.11 NA | NA      | NA      | NA      |      |
|    | 0.98    | 0.92    | 0.99    | 0.96    | 0.98    | 0.99 |
| NA | NA      | NA      | NA      | NA      | NA      |      |
|    | 0.12    | 0.12    | 0.13 NA | NA      | NA      |      |
|    | 0.55    | 0.75    | 1       | 1       | 1       | 1    |
|    | 0.77 NA | NA      | NA      |         | 0.82 NA |      |
|    | 0.29    | 0.67    | 0.25    | 0.55    | 0.22    | 0.2  |
|    | 0.07    | 0.06    | 0.06    | 0.04    | 0.13 NA |      |
|    | 0.97    | 0.99    | 0.97    | 0.98    | 0.96    | 0.92 |
|    | 0.12    | 0.15    | 0.16 NA | NA      | NA      |      |
|    | 0.27    | 0.24    | 0.24    | 0.18    | 0.15    | 0.19 |
|    | 0.14    | 0.19    | 0.12    | 0.14    | 0.12    | 0.11 |
|    | 0.48    | 0.46    | 0.66    | 0.65    | 0.42    | 0.31 |
|    | 0.99    | 0.98    | 0.92    | 0.9     | 0.92    | 0.96 |
|    | 0.97    | 0.97    | 0.9     | 0.85    | 0.91    | 0.73 |
|    | 0.91    | 0.79 NA | NA      | NA      | NA      |      |
|    | 0.52    | 0.45 NA | NA      | NA      | NA      |      |
|    | 0.08    | 0.07    | 0.17    | 0.33    | 0.12    | 0.23 |
| NA |         | 0.14 NA | NA      | NA      | NA      |      |
|    | 0.94    | 0.96 NA |         | 0.92    | 0.94    | 0.97 |
|    | 0.05    | 0.05    | 0.02    | 0.03    | 0.02    | 0.02 |
|    | 0.99    | 0.99    | 0.98    | 0.88    | 0.98    | 0.97 |
|    | 0.22    | 0.34 NA | NA      | NA      | NA      |      |
| NA | NA      |         | 0.86 NA | NA      | NA      |      |
|    | 0.05    | 0.04 NA | NA      | NA      | NA      |      |
|    | 0.1     | 0.08    | 0.31    | 0.09    | 0.21    | 0.24 |
| NA | NA      | NA      | NA      | NA      | NA      |      |
|    | 0.06    | 0.07    | 0.05    | 0.06    | 0.04    | 0.03 |
| NA | NA      | NA      | NA      | NA      | NA      |      |
|    | 0.57    | 0.52    | 0.78    | 0.88    | 0.76    | 0.55 |
|    | 0.99    | 0.99    | 0.98    | 0.98    | 0.98    | 0.98 |
|    | 0.11    | 0.09    | 0.15    | 0.1 NA  |         | 0.22 |
| NA |         | 0.55 NA | NA      |         | 0.49    | 0.48 |
|    | 0.98    | 0.99    | 0.96    | 0.99    | 0.99    | 0.97 |
|    | 0.17    | 0.17    | 0.18    | 0.18    | 0.21    | 0.22 |
|    | 0.27    | 0.22 NA | NA      | NA      | NA      |      |
|    | 0.3     | 0.36 NA | NA      | NA      | NA      |      |
|    | 0.26    | 0.43 NA | NA      | NA      | NA      |      |
|    | 0.93    | 0.92    | 0.92    | 0.99    | 0.94    | 0.91 |
|    | 0.79    | 0.85 NA |         | 0.95 NA | NA      |      |
|    | 0.99    | 1       | 1       | 1       | 0.99    | 0.99 |
|    | 0.95    | 0.97    | 0.92    | 0.98    | 0.99    | 0.97 |
|    | 0.99    | 1       | 0.99    | 0.99    | 1       | 0.99 |

|    |         |         |         |         |         |      |
|----|---------|---------|---------|---------|---------|------|
|    | 1       | 0.99    | 0.98    | 0.99    | 0.99    | 0.98 |
|    | 0.28    | 0.18 NA |         | 0.37 NA | NA      |      |
|    | 0.97    | 0.98 NA | NA      | NA      |         | 0.9  |
|    | 0.07    | 0.07 NA | NA      | NA      | NA      |      |
| NA | 0.99    | 0.99    | 0.99    | 0.99    | 1       | 1    |
|    | NA      |         | 0.03    | 0.05    | 0.03    | 0.04 |
|    | 0.9     | 0.95    | 0.87    | 0.9     | 0.9     | 0.76 |
|    | 0.98    | 0.99    | 0.99    | 1       | 1       | 0.99 |
|    | 0.55    | 0.51 NA |         | 0.53 NA | NA      |      |
|    | 0.06    | 0.04 NA | NA      | NA      | NA      |      |
|    | 0.1     | 0.09    | 0.17    | 0.13 NA |         | 0.19 |
|    | 0.21 NA | NA      |         | 0.23    | 0.19    | 0.12 |
|    | 0.29    | 0.19 NA | NA      | NA      | NA      |      |
|    | 0.98    | 0.98    | 0.99    | 0.98    | 0.98    | 0.98 |
|    | 0.59    | 0.77 NA | NA      | NA      | NA      |      |
|    | 0.08    | 0.04    | 0.09    | 0.09 NA | NA      |      |
| NA | NA      |         | 0.72    | 0.53    | 0.6     | 0.74 |
|    | 0.8     | 0.86    | 0.91    | 0.78    | 0.9     | 0.94 |
|    | 0.13    | 0.17 NA | NA      |         | 0.23    | 0.19 |
|    | 0.1     | 0.11    | 0.14 NA | NA      | NA      |      |
|    | 1       | 1       | 0.99    | 1       | 0.99    | 0.99 |
|    | 0.12    | 0.12    | 0.18    | 0.33 NA | NA      |      |
|    | 0.17    | 0.24 NA |         | 0.16 NA |         | 0.2  |
|    | 0.13    | 0.14    | 0.24    | 0.22    | 0.19    | 0.2  |
|    | 0.97    | 0.96    | 0.94    | 0.98    | 0.94    | 0.95 |
|    | 1       | 1       | 0.99    | 0.99    | 1       | 1    |
|    | 0.02    | 0.03    | 0.04 NA | NA      | NA      |      |
| NA | NA      |         | 0.36    | 0.32    | 0.45    | 0.32 |
|    | 1       | 1       | 1       | 1       | 1       | 1    |
| NA | 0.13    | 0.11    | 0.07    | 0.06    | 0.17 NA |      |
|    | NA      | NA      | NA      | NA      | NA      |      |
| NA | 0.95    | 0.99    | 0.9     | 0.89    | 0.95    | 0.92 |
|    |         | 0.86 NA | NA      | NA      | NA      |      |
|    | 0.23    | 0.19 NA | NA      | NA      | NA      |      |
|    | 0.65    | 0.34    | 0.5     | 0.21    | 0.39    | 0.15 |
|    | 0.98    | 0.98    | 0.97    | 0.97    | 0.97    | 0.97 |
|    | 0.45    | 0.47 NA |         | 0.79 NA | NA      |      |
|    | 0.33    | 0.25    | 0.17    | 0.15 NA |         | 0.2  |
|    | 0.15    | 0.17    | 0.11    | 0.1     | 0.08    | 0.13 |
|    | 0.25    | 0.23    | 0.27    | 0.58    | 0.29    | 0.5  |
|    | 0.18    | 0.19    | 0.26    | 0.28    | 0.31    | 0.3  |
| NA | NA      | NA      | NA      | NA      | NA      |      |
|    | 0.27    | 0.34 NA | NA      | NA      | NA      |      |
|    | 0.22    | 0.22 NA |         | 0.3 NA  | NA      |      |
|    | 0.56    | 0.83    | 0.98    | 0.97    | 0.95    | 0.97 |
| NA | NA      | NA      | NA      | NA      | NA      |      |
|    | 0.97    | 0.97    | 0.98    | 0.99    | 0.99    | 0.99 |
|    | 0.99    | 0.99    | 0.99    | 1       | 1       | 1    |
|    | 0.27    | 0.17 NA | NA      | NA      | NA      |      |

|    |        |         |         |         |         |      |
|----|--------|---------|---------|---------|---------|------|
|    | 0.94   | 0.94 NA |         | 0.92 NA | NA      |      |
|    | 0.99   | 0.99    | 0.99    | 0.99    | 1       | 0.99 |
|    | 0.45   | 0.56 NA | NA      |         | 0.65    | 0.6  |
|    | 1      | 1       | 1       | 1       | 1       | 1    |
| NA |        | 0.08 NA | NA      | NA      | NA      |      |
|    | 0.97   | 0.99 NA |         | 0.93    | 0.92    | 0.95 |
|    | 0.07   | 0.07    | 0.06    | 0.07    | 0.06    | 0.08 |
|    | 0.22   | 0.27    | 0.31    | 0.51    | 0.16    | 0.24 |
|    | 0.18   | 0.09 NA | NA      | NA      | NA      |      |
|    | 0.22   | 0.21    | 0.33    | 0.14    | 0.38    | 0.28 |
|    | 0.11   | 0.12 NA | NA      | NA      | NA      |      |
|    | 0.97   | 0.95    | 0.89    | 0.98    | 0.89 NA |      |
|    | 0.14   | 0.15    | 0.17    | 0.14    | 0.14    | 0.16 |
|    | 0.17   | 0.16 NA |         | 0.32 NA | NA      |      |
|    | 1      | 1       | 1       | 1       | 1       | 1    |
| NA |        | 0.23    | 0.18    | 0.24 NA | NA      |      |
|    | 0.07   | 0.1     | 0.06    | 0.07 NA | NA      |      |
|    | 0.24   | 0.22    | 0.2     | 0.14    | 0.16    | 0.18 |
|    | 0.06   | 0.07 NA | NA      | NA      | NA      |      |
|    | 0.99   | 0.99    | 0.98    | 0.98    | 0.98    | 0.98 |
| NA | NA     | NA      | NA      | 0.1     | 0.14    |      |
|    | 0.16   | 0.19 NA | NA      | NA      | NA      |      |
|    | 0.11   | 0.11    | 0.11    | 0.09    | 0.08    | 0.1  |
|    | 0.57   | 0.63    | 0.92    | 0.69    | 0.8     | 0.91 |
|    | 0.13   | 0.12    | 0.09    | 0.11    | 0.09    | 0.07 |
|    | 1      | 1       | 1       | 1       | 1       | 0.99 |
|    | 0.5 NA | NA      | NA      | NA      | NA      |      |
|    | 0.16   | 0.18 NA | NA      | NA      | NA      |      |
| NA | NA     |         | 0.14    | 0.18    | 0.12    | 0.12 |
| NA |        | 0.07 NA | NA      | NA      | NA      |      |
|    | 0.05   | 0.05 NA | NA      | NA      | NA      |      |
|    | 0.96   | 0.95    | 0.88    | 0.95    | 0.86    | 0.87 |
|    | 0.25   | 0.27    | 0.63    | 0.69    | 0.91    | 0.83 |
|    | 1      | 1       | 0.99    | 0.99    | 0.97    | 0.97 |
| NA | NA     | NA      |         | 0.34    | 0.18    | 0.23 |
|    | 0.09   | 0.13 NA | NA      | NA      | NA      |      |
|    | 0.84   | 0.71    | 0.89 NA | NA      |         | 0.91 |
|    | 0.14   | 0.18    | 0.23 NA | NA      | NA      |      |
| NA | NA     | NA      | NA      | NA      | NA      |      |
|    | 0.88   | 0.89    | 0.94    | 0.97    | 0.95    | 0.96 |
|    | 0.23   | 0.18 NA |         | 0.34 NA | NA      |      |
|    | 0.74   | 0.84 NA | NA      | NA      | NA      |      |
|    | 1      | 1       | 0.97    | 0.91    | 0.99    | 0.98 |
|    | 0.17   | 0.22 NA | NA      | NA      | NA      |      |
|    | 0.38   | 0.3     | 0.57    | 0.48    | 0.69    | 0.73 |
|    | 0.89   | 0.89    | 0.66    | 0.97    | 0.92    | 0.81 |
|    | 0.04   | 0.04    | 0.06    | 0.17 NA | NA      |      |
|    | 0.13   | 0.09    | 0.12 NA | NA      | NA      |      |
|    | 0.97   | 0.97    | 0.91    | 0.92    | 0.94    | 0.96 |

|    |      |         |      |         |         |      |
|----|------|---------|------|---------|---------|------|
|    | 0.21 | 0.18 NA |      | 0.12 NA | NA      |      |
|    | 0.98 | 0.99    | 0.99 | 0.99    | 0.99    | 0.99 |
| NA | NA   |         | 0.43 | 0.83    | 0.47    | 0.67 |
|    | 0.99 | 0.99    | 0.94 | 0.94    | 0.96    | 0.96 |
|    | 0.99 | 0.98    | 0.99 | 1       | 0.98    | 0.98 |
|    | 0.11 | 0.11 NA |      | 0.16 NA | NA      |      |
|    | 0.32 | 0.22    | 0.27 | 0.32    | 0.29    | 0.16 |
|    | 0.02 | 0.01    | 0.05 | 0.05 NA | NA      |      |
|    | 0.62 | 0.62    | 0.57 | 0.77    | 0.84    | 0.82 |
|    | 0.59 | 0.55    | 0.97 | 0.99    | 0.77    | 0.84 |
| NA | NA   | NA      | NA   | NA      | NA      |      |
|    | 0.55 | 0.52 NA |      | 0.67    | 0.64    | 0.62 |
|    | 0.15 | 0.16    | 0.48 | 0.46    | 0.3     | 0.25 |
|    | 0.51 | 0.58 NA |      | 0.51    | 0.68 NA |      |
|    | 0.66 | 0.57 NA | NA   |         | 0.62 NA |      |

t12\_1\_riboZer t12\_2\_riboZer RAPplus\_2\_rib RAPminus\_2\_ri sk1\_1\_riboZero

|    |      |    |      |      |    |      |    |      |
|----|------|----|------|------|----|------|----|------|
|    | 0.98 | NA |      | 0.96 |    | 1    |    | 1    |
|    | 0.92 |    | 0.84 | 0.98 |    | 0.93 |    | 0.94 |
|    | 0.14 |    | 0.13 | 0.24 |    | 0.07 |    | 0.03 |
|    | 0.22 |    | 0.15 | 0.18 |    | 0.06 |    | 0.05 |
|    | 0.3  |    | 0.39 | 0.45 |    | 0.08 |    | 0.03 |
|    | 0.97 |    | 0.97 | 0.96 |    | 0.86 |    | 0.95 |
|    | 0.84 |    | 0.93 | 0.86 |    | 0.9  |    | 0.92 |
|    | 0.18 |    | 0.2  | 0.99 |    | 0.97 |    | 0.7  |
|    | 0.69 |    | 0.38 | 0.12 |    | 0.12 |    | 0.16 |
|    | 0.13 |    | 0.35 | 0.23 |    | 0.58 | NA |      |
|    | 0.99 |    | 0.99 | 0.99 |    | 0.98 |    | 0.98 |
|    | 0.87 |    | 0.91 | NA   |    | NA   |    | NA   |
|    | 0.96 |    | 0.99 | 0.99 |    | 0.99 |    | 0.97 |
|    | 0.93 | NA |      | NA   |    | 0.9  |    | 0.92 |
|    | 0.21 |    | 0.25 | 0.28 |    | 0.11 |    | 0.08 |
|    | 0.77 |    | 0.45 | 0.99 |    | 0.99 |    | 0.9  |
|    | 1    |    | 1    | 1    |    | 1    |    | 1    |
|    | 0.2  |    | 0.15 | 0.31 |    | 0.09 |    | 0.05 |
|    | 0.55 |    | 0.49 | 0.6  |    | 0.21 |    | 0.14 |
|    | 0.25 |    | 0.2  | 0.39 |    | 0.09 |    | 0.03 |
|    | 1    |    | 1    | 1    |    | 1    |    | 1    |
|    | 0.31 |    | 0.2  | 0.11 |    | 0.05 |    | 0.04 |
|    | 0.3  |    | 0.16 | 0.29 |    | 0.12 |    | 0.07 |
| NA |      |    | 0.2  | 0.28 |    | 0.1  |    | 0.08 |
| NA |      |    | 0.39 | 0.21 |    | 0.08 |    | 0.06 |
|    | 0.37 |    | 0.42 | 0.68 |    | 0.12 |    | 0.08 |
|    | 0.27 |    | 0.26 | NA   |    | NA   |    | NA   |
|    | 0.86 |    | 0.8  | 0.97 |    | 0.96 |    | 0.96 |
|    | 0.32 |    | 0.25 | 0.39 |    | 0.09 |    | 0.07 |
|    | 0.08 |    | 0.07 | 0.15 |    | 0.06 |    | 0.04 |
|    | 0.94 |    | 0.92 | 0.9  |    | 0.93 |    | 0.95 |
|    | 0.55 |    | 0.47 | 0.59 |    | 0.57 |    | 0.42 |
|    | 0.99 |    | 0.99 | 1    |    | 1    |    | 1    |
|    | 0.93 | NA |      | 0.91 | NA |      |    | NA   |
|    | 0.4  |    | 0.44 | 0.37 |    | 0.13 |    | 0.08 |
|    | 0.98 |    | 0.98 | 0.98 |    | 0.97 |    | 0.95 |
|    | 0.97 |    | 0.98 | 0.95 |    | 0.94 |    | 0.9  |
|    | 1    |    | 1    | 1    |    | 0.99 |    | 0.99 |
|    | 0.83 |    | 0.77 | NA   |    | NA   |    | NA   |
|    | 0.27 |    | 0.19 | 0.3  |    | 0.07 |    | 0.05 |
|    | 0.24 |    | 0.17 | 0.58 |    | 0.09 |    | 0.03 |
|    | 1    |    | 1    | 1    |    | 1    |    | 1    |
|    | 0.21 |    | 0.2  | 0.3  |    | 0.39 | NA |      |
|    | 0.98 |    | 0.98 | 1    |    | 1    |    | 1    |
|    | 0.45 |    | 0.55 | NA   |    | NA   |    | NA   |
|    | 0.16 |    | 0.24 | 0.36 |    | 0.13 |    | 0.07 |
|    | 0.86 |    | 0.84 | 0.59 |    | 0.52 |    | 0.59 |



|    |         |         |         |         |      |
|----|---------|---------|---------|---------|------|
|    | 0.96    | 0.97    | 0.73    | 0.65    | 0.69 |
|    | 1       | 1       | 1       | 1       | 1    |
|    | 0.34 NA |         | 0.28    | 0.07    | 0.05 |
|    | 0.98    | 0.99 NA | NA      |         | 0.97 |
|    | 0.17    | 0.19    | 0.17    | 0.1     | 0.07 |
| NA | 0.19    | 0.23 NA | NA      | NA      |      |
|    | NA      | NA      | NA      | NA      |      |
|    | 0.93 NA | NA      | NA      | NA      |      |
|    | 0.2 NA  |         | 0.62    | 0.19    | 0.14 |
|    | 0.97    | 0.95 NA |         | 0.17 NA |      |
|    | 0.24    | 0.28    | 0.25    | 0.05    | 0.03 |
|    | 0.88    | 0.46    | 0.83    | 0.81    | 0.74 |
|    | 0.99    | 0.99 NA | NA      |         | 0.83 |
|    | 0.69    | 0.75    | 0.81 NA | NA      |      |
|    | 0.35    | 0.29    | 0.18    | 0.06    | 0.04 |
|    | 0.36    | 0.29    | 0.35    | 0.22    | 0.27 |
|    | 0.99    | 0.98    | 0.98    | 0.97    | 0.97 |
|    | 0.81    | 0.89    | 0.96    | 0.97    | 0.65 |
|    | 1       | 1       | 0.98    | 0.97    | 0.99 |
| NA | NA      |         | 0.96    | 0.84    | 0.43 |
|    | 0.99    | 0.98    | 1       | 1       | 1    |
|    | 0.36    | 0.33    | 0.36    | 0.07    | 0.05 |
|    | 0.33    | 0.22 NA | NA      | NA      |      |
|    | 0.79 NA | NA      | NA      | NA      |      |
|    | 0.8     | 0.82    | 0.79    | 0.85    | 0.88 |
|    | 0.18 NA |         | 0.29    | 0.04    | 0.03 |
|    | 0.89 NA |         | 0.87    | 0.96    | 0.64 |
|    | 0.97    | 0.86 NA | NA      | NA      |      |
|    | 0.3     | 0.2     | 0.22    | 0.09    | 0.04 |
| NA | NA      | NA      | NA      | NA      |      |
|    | 0.98    | 0.98    | 0.98    | 1       | 1    |
|    | 0.92    | 0.86 NA |         | 0.83 NA |      |
|    | 0.91    | 0.76    | 0.8     | 0.96    | 0.89 |
|    | 0.59    | 0.52    | 0.74    | 0.66    | 0.49 |
|    | 0.4     | 0.41    | 0.27    | 0.28    | 0.24 |
| NA | NA      |         | 0.98    | 0.99    | 0.67 |
|    | 0.98    | 0.98    | 0.96 NA | NA      |      |
| NA |         | 0.39    | 0.33    | 0.36    | 0.59 |
|    | 0.75    | 0.77 NA | NA      | NA      |      |
|    | 0.36    | 0.21    | 0.46    | 0.16    | 0.09 |
|    | 0.18    | 0.24    | 0.26    | 0.17    | 0.1  |
|    | 0.98    | 0.98    | 0.93    | 0.88    | 0.55 |
| NA | NA      | NA      | NA      | NA      |      |
|    | 0.73    | 0.54    | 0.27    | 0.32    | 0.25 |
|    | 0.92    | 0.96    | 0.89    | 0.97    | 0.96 |
|    | 0.89    | 0.92    | 0.9 NA  | NA      |      |
|    | 0.47    | 0.34 NA | NA      |         | 0.89 |
|    | 0.74    | 0.81    | 0.35    | 0.37    | 0.37 |
|    | 0.83 NA | NA      | NA      |         | 0.29 |

|    |         |         |         |         |      |
|----|---------|---------|---------|---------|------|
|    | 0.53    | 0.5     | 0.55    | 0.35    | 0.18 |
|    | 0.97    | 0.97    | 0.98    | 1       | 1    |
| NA | NA      | NA      | NA      | NA      |      |
|    | 0.97    | 0.99    | 0.93    | 0.92    | 0.98 |
|    | 0.96    | 0.93    | 0.89    | 0.82    | 0.82 |
|    | 0.3     | 0.19    | 0.14    | 0.05    | 0.06 |
|    | 0.56    | 0.37    | 0.17    | 0.16    | 0.14 |
|    | 0.98    | 0.96 NA | NA      |         | 0.89 |
|    | 0.96    | 0.91    | 0.55    | 0.78    | 0.5  |
|    | 0.51    | 0.36    | 0.27    | 0.24    | 0.38 |
|    | 0.99    | 0.97    | 1       | 0.99    | 0.98 |
|    | 1       | 1       | 1       | 1       | 0.99 |
|    | 0.9     | 0.88    | 0.83    | 0.88    | 0.78 |
| NA | NA      | NA      | NA      | NA      |      |
|    | 0.14    | 0.08    | 0.11    | 0.04    | 0.02 |
|    | 0.56    | 0.49    | 0.69    | 0.26    | 0.16 |
|    | 0.9     | 0.9     | 0.48    | 0.45 NA |      |
|    | 0.26    | 0.3     | 0.68    | 0.18    | 0.13 |
|    | 0.94    | 0.81 NA |         | 0.95    | 0.9  |
|    | 1       | 1       | 1       | 1       | 1    |
|    | 0.23    | 0.19    | 0.16 NA | NA      |      |
|    | 0.98    | 0.98    | 1       | 1       | 0.95 |
|    | 0.86 NA |         | 0.57    | 0.24    | 0.28 |
| NA | NA      | NA      |         | 0.43    | 0.28 |
| NA | NA      | NA      | NA      | NA      |      |
|    | 0.86    | 0.77    | 0.26    | 0.28    | 0.35 |
|    | 0.19    | 0.22    | 0.2     | 0.21    | 0.34 |
|    | 0.98    | 0.97    | 0.99    | 0.95    | 0.94 |
|    | 1       | 1       | 1       | 1       | 1    |
|    | 0.76    | 0.76    | 0.37    | 0.23    | 0.12 |
|    | 0.77    | 0.79    | 0.68    | 0.57    | 0.47 |
|    | 0.99    | 0.99    | 0.97    | 0.94    | 0.95 |
|    | 0.87    | 0.37    | 0.23    | 0.29    | 0.28 |
|    | 0.43    | 0.3     | 0.31    | 0.35    | 0.55 |
|    | 0.71    | 0.67    | 0.25    | 0.15    | 0.12 |
|    | 1       | 1       | 0.99    | 0.92 NA |      |
|    | 1       | 1       | 0.96    | 0.96    | 0.96 |
| NA | NA      |         | 0.96    | 0.8 NA  |      |
|    | 0.98    | 0.98    | 0.95    | 0.99    | 0.99 |
|    | 0.24    | 0.1     | 0.3     | 0.07    | 0.03 |
|    | 0.5     | 0.28    | 0.47    | 0.16    | 0.08 |
|    | 0.14    | 0.07    | 0.21    | 0.07    | 0.04 |
|    | 0.97    | 0.86    | 0.94    | 0.9     | 0.85 |
|    | 0.99    | 0.99    | 0.99    | 0.99    | 0.99 |
|    | 0.98    | 0.98    | 0.89    | 0.98    | 0.99 |
|    | 0.84    | 0.74    | 0.99    | 0.97    | 0.99 |
|    | 0.85    | 0.56 NA | NA      | NA      |      |
|    | 0.97    | 0.94    | 0.84 NA |         | 0.88 |
| NA |         | 0.12    | 0.2     | 0.13    | 0.29 |

|    |      |      |      |      |    |      |
|----|------|------|------|------|----|------|
| NA | NA   |      | 0.44 | NA   | NA |      |
|    | 0.87 | 0.96 | 0.61 | 0.97 |    | 0.83 |
| NA | NA   | NA   | NA   | NA   | NA |      |
|    | 0.22 | 0.17 | 0.29 | 0.08 |    | 0.04 |
|    | 0.08 | 0.07 | 0.1  | 0.13 |    | 0.15 |
|    | 0.49 | 0.42 | 0.4  | NA   |    | 0.34 |
| NA | NA   |      | 0.94 | 0.96 | NA |      |
|    | 0.25 | 0.16 | 0.34 | 0.09 |    | 0.04 |
|    | 0.31 | 0.4  | 0.39 | 0.1  |    | 0.05 |
|    | 0.14 | NA   | 0.22 | 0.09 |    | 0.05 |
|    | 0.92 | 0.35 | 0.97 | 0.98 |    | 0.97 |
|    | 0.32 | 0.28 | 0.54 | 0.64 |    | 0.54 |
|    | 0.37 | 0.33 | 0.19 | 0.17 |    | 0.25 |
| NA | NA   | NA   | NA   | NA   | NA |      |
| NA | NA   |      | 0.97 | 1    |    | 1    |
|    | 0.95 | 0.97 | 0.7  | 0.72 |    | 0.73 |
|    | 0.99 | 0.96 | 1    | 1    |    | 1    |
|    | 0.7  | NA   | 0.99 | 0.98 |    | 0.98 |
|    | 0.19 | 0.17 | 0.66 | 0.27 |    | 0.34 |
|    | 0.92 | 0.86 | 0.64 | 0.91 |    | 0.87 |
|    | 0.95 | 0.93 | 0.92 | 0.91 |    | 0.97 |
|    | 0.25 | 0.29 | 0.06 | 0.06 |    | 0.08 |
|    | 0.67 | 0.61 | 0.13 | NA   | NA |      |
|    | 0.75 | 0.68 | 0.43 | 0.33 |    | 0.3  |
|    | 0.71 | 0.74 | 0.35 | 0.39 |    | 0.33 |
|    | 0.22 | 0.55 | 0.46 | 0.1  |    | 0.07 |
|    | 0.9  | 0.92 | 0.83 | NA   | NA |      |
|    | 1    | 1    | 1    | 1    |    | 1    |
|    | 0.43 | 0.57 | 0.6  | 0.26 |    | 0.18 |
|    | 0.98 | NA   | 0.98 | 1    |    | 1    |
|    | 0.89 | 0.96 | 0.9  | 0.87 |    | 0.9  |
|    | 0.17 | 0.23 | 0.27 | 0.04 |    | 0.02 |
|    | 0.23 | 0.21 | 0.97 | 0.93 | NA |      |
|    | 0.37 | 0.45 | NA   | NA   | NA |      |
|    | 0.86 | 0.57 | 0.43 | 0.38 | NA |      |
|    | 0.14 | 0.13 | 0.21 | 0.05 |    | 0.03 |
|    | 0.75 | 0.59 | 0.95 | 0.32 |    | 0.43 |
|    | 0.42 | NA   | 0.21 | 0.14 |    | 0.16 |
|    | 0.98 | 0.98 | 0.99 | 0.99 |    | 0.97 |
|    | 0.13 | 0.1  | 0.14 | 0.06 |    | 0.05 |
|    | 0.98 | 0.98 | 0.95 | 0.96 |    | 0.94 |
|    | 0.88 | 0.79 | 0.75 | 0.68 |    | 0.63 |
|    | 0.33 | 0.35 | 0.47 | 0.09 |    | 0.05 |
|    | 0.34 | 0.74 | 0.33 | 0.52 |    | 0.59 |
| NA | NA   |      | 0.98 | 0.98 |    | 0.98 |
|    | 0.26 | 0.17 | 0.17 | 0.22 |    | 0.25 |
|    | 0.99 | 0.99 | 0.98 | 0.98 |    | 0.98 |
|    | 0.59 | 0.94 | 0.94 | 0.79 |    | 0.61 |
|    | 0.99 | 0.99 | 0.99 | 1    |    | 1    |

|    |         |         |         |         |      |
|----|---------|---------|---------|---------|------|
|    | 0.76    | 0.76    | 0.78    | 0.67    | 0.82 |
|    | 0.2     | 0.15    | 0.22 NA |         | 0.16 |
|    | 1       | 1       | 0.99    | 0.98    | 0.97 |
|    | 0.7     | 0.43    | 0.77    | 0.69    | 0.64 |
|    | 0.27    | 0.19    | 0.35    | 0.29    | 0.24 |
|    | 0.99    | 0.99    | 0.99    | 0.99    | 1    |
| NA | NA      | NA      | NA      | NA      |      |
|    | 0.94 NA |         | 0.26 NA | NA      | NA   |
|    | 0.16    | 0.13 NA | NA      | NA      | NA   |
|    | 0.99    | 0.98    | 0.74 NA | NA      | NA   |
|    | 0.47    | 0.41    | 0.51    | 0.08    | 0.05 |
|    | 0.33    | 0.19    | 0.33    | 0.07    | 0.05 |
|    | 0.5     | 0.52    | 0.81    | 0.63    | 0.6  |
|    | 0.66    | 0.73 NA | NA      | NA      | NA   |
|    | 0.61    | 0.52    | 0.3     | 0.31    | 0.5  |
|    | 0.94    | 0.84    | 0.88    | 0.89 NA |      |
|    | 0.91    | 0.87    | 0.79    | 0.85 NA |      |
|    | 0.26    | 0.45    | 0.66    | 0.15    | 0.09 |
|    | 0.18    | 0.17    | 0.22    | 0.11    | 0.09 |
|    | 0.92 NA |         | 0.89    | 0.89 NA |      |
|    | 0.27    | 0.17    | 0.33    | 0.37    | 0.32 |
|    | 0.39    | 0.26    | 0.21    | 0.05    | 0.01 |
|    | 0.99    | 0.99    | 1       | 1       | 1    |
|    | 0.36    | 0.4     | 0.11    | 0.07    | 0.03 |
|    | 0.97    | 0.97    | 0.97    | 0.99    | 0.98 |
|    | 0.99    | 0.99    | 0.99    | 1       | 1    |
|    | 0.49    | 0.35    | 0.37    | 0.26    | 0.27 |
|    | 0.7 NA  |         | 0.11    | 0.14    | 0.13 |
|    | 0.64    | 0.85    | 0.88    | 0.77    | 0.43 |
|    | 0.19    | 0.23    | 0.14    | 0.15    | 0.19 |
| NA | NA      | NA      | NA      | NA      |      |
|    | 1       | 1       | 1       | 1       | 1    |
|    | 0.13    | 0.35    | 0.22    | 0.59 NA |      |
|    | 0.98    | 0.98    | 0.99    | 1       | 1    |
|    | 0.37    | 0.54    | 0.52    | 0.15    | 0.08 |
|    | 0.91    | 0.85    | 0.89    | 0.92 NA |      |
|    | 0.46    | 0.48    | 0.42 NA | NA      |      |
|    | 0.89    | 0.62    | 0.99    | 0.99    | 0.94 |
|    | 0.57    | 0.66    | 0.86    | 0.3     | 0.23 |
|    | 0.99    | 0.99    | 0.97    | 0.98    | 0.97 |
| NA | NA      | NA      | NA      | NA      |      |
|    | 1       | 1       | 1       | 0.99    | 1    |
|    | 0.63 NA | NA      |         | 0.47    | 0.29 |
|    | 0.3 NA  |         | 0.28    | 0.08    | 0.04 |
|    | 0.51    | 0.36    | 0.38    | 0.16    | 0.09 |
|    | 0.22    | 0.16    | 0.17    | 0.27    | 0.52 |
| NA | NA      |         | 0.67    | 0.28    | 0.22 |
|    | 0.82 NA |         | 0.62    | 0.75    | 0.82 |
|    | 0.26    | 0.29    | 0.25 NA | NA      |      |

|    |         |         |      |         |      |
|----|---------|---------|------|---------|------|
|    | 0.1     | 0.07    | 0.27 | 0.24    | 0.45 |
|    | 0.25    | 0.33    | 0.16 | 0.07    | 0.07 |
|    | 0.74    | 0.83    | 0.59 | 0.6     | 0.57 |
|    | 0.23 NA |         | 0.21 | 0.12    | 0.1  |
|    | 0.96    | 0.97    | 1    | 1       | 0.97 |
| NA | NA      |         | 0.99 | 0.98 NA |      |
|    | 0.28    | 0.25    | 0.24 | 0.08    | 0.03 |
|    | 0.99    | 0.96 NA | NA   | NA      |      |
| NA | NA      | NA      | NA   | NA      |      |
|    | 0.13    | 0.1     | 0.15 | 0.09    | 0.07 |
|    | 1       | 1       | 1    | 1       | 1    |
| NA | NA      | NA      | NA   | NA      |      |
| NA |         | 0.74    | 0.57 | 0.43 NA |      |
|    | 0.29    | 0.16    | 0.45 | 0.09    | 0.04 |
|    | 0.97    | 0.96    | 0.98 | 0.98    | 0.97 |
| NA | NA      | NA      | NA   | NA      |      |
|    | 0.24    | 0.2     | 0.29 | 0.19    | 0.3  |
|    | 0.12    | 0.22    | 0.21 | 0.2     | 0.18 |
|    | 0.39    | 0.35    | 0.16 | 0.23    | 0.27 |
|    | 0.98    | 0.97    | 0.97 | 0.98    | 0.97 |
|    | 0.86    | 0.87    | 0.98 | 1       | 1    |
|    | 0.95    | 0.91    | 0.87 | 0.95    | 0.88 |
|    | 0.96    | 0.95 NA | NA   | NA      |      |
|    | 0.2     | 0.21    | 0.25 | 0.05    | 0.04 |
|    | 0.66    | 0.83 NA |      | 0.59    | 0.43 |
|    | 0.91    | 0.93    | 0.97 | 0.97    | 0.88 |
|    | 0.02    | 0.01    | 0.12 | 0.07    | 0.03 |
|    | 0.98    | 0.96    | 0.99 | 1       | 1    |
|    | 0.72    | 0.54    | 0.47 | 0.13    | 0.08 |
|    | 0.91 NA | NA      | NA   | NA      |      |
|    | 0.19    | 0.1     | 0.14 | 0.05    | 0.02 |
|    | 0.26    | 0.25    | 0.74 | 0.94    | 0.49 |
|    | 0.85 NA |         | 0.9  | 0.18    | 0.11 |
|    | 0.09    | 0.09    | 0.09 | 0.1     | 0.11 |
|    | 0.58    | 0.77 NA | NA   | NA      |      |
|    | 0.96    | 0.96    | 0.67 | 0.51    | 0.47 |
|    | 0.97    | 0.99    | 0.98 | 0.99    | 0.98 |
|    | 0.18    | 0.15    | 0.23 | 0.07    | 0.06 |
|    | 0.91    | 0.69 NA | NA   | NA      |      |
|    | 0.98    | 0.99    | 0.99 | 0.98    | 0.98 |
|    | 0.36    | 0.37    | 0.35 | 0.47    | 0.36 |
|    | 0.46    | 0.4     | 0.11 | 0.13    | 0.28 |
|    | 0.93 NA | NA      | NA   | NA      |      |
| NA | NA      |         | 0.35 | 0.52 NA |      |
|    | 0.98    | 0.99    | 0.84 | 0.94    | 0.92 |
| NA |         | 0.95 NA |      | 0.89    | 0.93 |
|    | 0.99    | 1       | 0.99 | 0.99    | 0.99 |
|    | 0.99    | 0.99    | 0.96 | 0.93    | 0.95 |
|    | 1       | 0.99    | 0.99 | 0.98    | 0.98 |

|    |         |         |         |         |      |
|----|---------|---------|---------|---------|------|
|    | 0.99    | 0.99    | 1       | 0.99    | 0.98 |
|    | 0.4 NA  |         | 0.38    | 0.4     | 0.17 |
|    | 0.97    | 0.96    | 0.96    | 0.96    | 0.97 |
| NA |         | 0.16 NA |         | 0.15 NA |      |
|    | 1       | 1       | 0.99    | 0.98    | 0.98 |
|    | 0.1     | 0.06    | 0.12    | 0.07 NA |      |
|    | 0.96    | 0.92    | 0.97    | 0.93    | 0.84 |
|    | 0.98    | 0.99    | 0.98    | 0.98    | 0.99 |
| NA |         | 0.86 NA |         | 0.62    | 0.68 |
|    | 0.23    | 0.21    | 0.15    | 0.07    | 0.02 |
|    | 0.59    | 0.27    | 0.07    | 0.18    | 0.14 |
|    | 0.77    | 0.5     | 0.44    | 0.43    | 0.21 |
| NA | NA      |         | 0.14 NA | NA      |      |
|    | 0.97    | 0.94    | 0.99    | 0.99    | 0.99 |
|    | 0.67    | 0.7     | 0.78    | 0.68    | 0.58 |
|    | 0.43    | 0.61    | 0.58    | 0.08    | 0.04 |
| NA |         | 0.81 NA | NA      | NA      |      |
|    | 0.91    | 0.64    | 0.98    | 0.99    | 0.92 |
|    | 0.3     | 0.19    | 0.37 NA | NA      |      |
|    | 0.18    | 0.28    | 0.42    | 0.07    | 0.04 |
|    | 0.99    | 0.98    | 0.99    | 1       | 1    |
|    | 0.28    | 0.27    | 0.23    | 0.24    | 0.11 |
| NA | NA      |         | 0.46    | 0.35    | 0.46 |
|    | 0.67    | 0.63    | 0.29    | 0.12    | 0.06 |
|    | 0.99    | 0.94    | 0.94    | 0.95 NA |      |
|    | 1       | 1       | 0.99    | 0.99    | 0.99 |
|    | 0.05 NA |         | 0.15    | 0.05    | 0.03 |
|    | 0.61    | 0.76    | 0.81    | 0.76 NA |      |
|    | 1       | 1       | 1       | 1       | 1    |
|    | 0.94    | 0.92 NA | NA      | NA      |      |
| NA | NA      |         | 1       | 0.99 NA |      |
|    | 0.92    | 0.92    | 0.88    | 0.89 NA |      |
|    | 0.81 NA |         | 0.89    | 0.85    | 0.84 |
|    | 0.23    | 0.23    | 0.43    | 0.32    | 0.13 |
|    | 0.91    | 0.81    | 0.64 NA | NA      |      |
|    | 0.92    | 0.96    | 0.98    | 0.98    | 0.97 |
| NA |         | 0.75 NA | NA      | NA      |      |
| NA | NA      | NA      | NA      |         | 0.22 |
|    | 0.09    | 0.07    | 0.17    | 0.06    | 0.12 |
|    | 0.46    | 0.41    | 0.26    | 0.08    | 0.07 |
|    | 0.3     | 0.34    | 0.32    | 0.44    | 0.31 |
|    | 0.3 NA  | NA      | NA      | NA      |      |
|    | 0.9     | 0.68    | 0.54    | 0.28 NA |      |
| NA |         | 0.87 NA | NA      | NA      |      |
|    | 0.96    | 0.88    | 0.89    | 0.95    | 0.9  |
| NA | NA      | NA      | NA      | NA      |      |
|    | 1       | 0.99    | 0.99    | 0.94    | 0.94 |
|    | 0.98    | 0.99    | 0.97    | 0.98    | 0.98 |
| NA | NA      | NA      | NA      | NA      |      |

|    |         |         |         |        |      |
|----|---------|---------|---------|--------|------|
|    | 0.99    | 0.98    | 0.93    | 0.99   | 1    |
|    | 1       | 1       | 1       | 1      | 0.99 |
| NA | NA      |         | 0.88 NA |        | 0.63 |
|    | 1       | 1       | 0.99    | 0.99   | 1    |
|    | 0.12    | 0.16    | 0.08    | 0.1    | 0.18 |
|    | 0.97    | 0.96    | 0.97    | 0.96   | 0.94 |
|    | 0.08    | 0.11    | 0.05    | 0.04   | 0.05 |
|    | 0.43    | 0.43    | 0.45    | 0.24   | 0.17 |
|    | 0.18    | 0.27    | 0.37    | 0.08   | 0.05 |
|    | 0.59    | 0.46    | 0.91    | 0.5    | 0.3  |
|    | 0.61    | 0.45    | 0.48    | 0.12   | 0.06 |
|    | 0.88 NA |         | 0.93    | 0.97   | 0.98 |
|    | 0.22    | 0.21    | 0.1     | 0.13   | 0.15 |
|    | 0.46 NA | NA      | NA      | NA     |      |
|    | 1       | 1       | 1       | 1      | 1    |
| NA | NA      |         | 0.78    | 0.39   | 0.29 |
|    | 0.16    | 0.08    | 0.17    | 0.1    | 0.09 |
|    | 0.21    | 0.18    | 0.19    | 0.24   | 0.25 |
|    | 0.18 NA |         | 0.2     | 0.04   | 0.03 |
|    | 0.96    | 0.97    | 0.97    | 0.99   | 0.99 |
| NA | NA      | NA      | NA      | NA     |      |
|    | 0.7     | 0.41    | 0.37    | 0.14   | 0.12 |
|    | 0.26    | 0.27    | 0.1     | 0.09   | 0.1  |
|    | 0.73    | 0.45    | 0.99    | 0.99   | 0.92 |
|    | 0.33    | 0.26    | 0.1     | 0.2    | 0.17 |
|    | 1       | 0.99    | 0.99    | 0.99   | 1    |
|    | 0.86 NA | NA      | NA      | NA     |      |
|    | 0.63    | 0.45    | 0.15    | 0.11   | 0.24 |
|    | 0.53    | 0.5 NA  |         | 0.7 NA |      |
|    | 0.3 NA  |         | 0.35    | 0.09   | 0.04 |
|    | 0.11    | 0.06    | 0.14    | 0.04   | 0.02 |
|    | 0.88    | 0.87    | 0.99    | 0.95   | 0.96 |
|    | 0.97    | 0.95 NA | NA      | NA     |      |
|    | 0.99    | 0.99    | 1       | 0.99   | 0.99 |
|    | 0.88 NA | NA      | NA      | NA     |      |
|    | 0.27 NA |         | 0.18 NA | NA     |      |
|    | 0.9     | 0.91    | 0.79    | 0.7    | 0.78 |
|    | 0.2 NA  |         | 0.32    | 0.09   | 0.07 |
| NA | NA      | NA      | NA      | NA     |      |
|    | 0.88    | 0.87    | 0.31    | 0.37   | 0.56 |
| NA | NA      |         | 0.22    | 0.21   | 0.19 |
|    | 0.75    | 0.72    | 0.81    | 0.92   | 0.75 |
|    | 0.73    | 0.88    | 1       | 0.7    | 0.74 |
|    | 0.62    | 0.43    | 0.51    | 0.11   | 0.08 |
|    | 0.75    | 0.58    | 0.9     | 0.27   | 0.27 |
|    | 0.92    | 0.97    | 0.94    | 0.96   | 0.96 |
|    | 0.22    | 0.17    | 0.26    | 0.09   | 0.03 |
|    | 0.23    | 0.3     | 0.48    | 0.1    | 0.07 |
|    | 0.97    | 0.96    | 0.96    | 0.94   | 0.96 |

|    |         |         |         |         |      |
|----|---------|---------|---------|---------|------|
|    | 0.25 NA |         | 0.21    | 0.25    | 0.25 |
|    | 1       | 1       | 1       | 1       | 1    |
|    | 0.96    | 0.96 NA |         | 0.81    | 0.93 |
|    | 0.97    | 0.96    | 0.97    | 0.97    | 0.99 |
|    | 0.98    | 0.97    | 1       | 1       | 1    |
| NA | NA      | NA      | NA      | NA      |      |
|    | 0.13    | 0.35    | 0.23    | 0.58 NA |      |
|    | 0.07    | 0.06    | 0.14    | 0.03    | 0.01 |
|    | 0.97    | 0.99 NA | NA      | NA      |      |
|    | 0.57    | 0.59    | 0.71    | 0.72    | 0.65 |
| NA | NA      | NA      | NA      |         | 0.43 |
|    | 0.84    | 0.75    | 0.79    | 0.87    | 0.74 |
|    | 0.32    | 0.32    | 0.73    | 0.62    | 0.82 |
|    | 0.9     | 0.78    | 0.42 NA | NA      |      |
|    | 0.59 NA |         | 0.86 NA |         | 0.63 |
