# Supplementary material for: Identification of new branch points and unconventional introns in Saccharomyces cerevisiae
Source: PubMed Central journal article supplement — RNA. 2016 Oct;22(10):1522–34. doi: 10.1261/rna.057216.116 (PMC5029451; doi:10.1261/rna.057216.116), 2016-10
Supplement: supp_057216.116_Supplemental_TableS5.pdf [file supp_057216.116_Supplemental_TableS5.pdf]

**Table S5. Saccar 3 coordinates of lariat junction reads\***

\*List of BPs detected through LJ reads from the Lariat-seq data. BP positions were determined from locations of the 3' most end of LJ reads and sequence information as described in the methods. The 'reads\_at\_dist\_to\_bp' field represents the number of LJ reads ending at various positions from the reported BP, the first in the list is zero away. The final two fields are marked 1, if the 5'SS or BP was previously annotated in the SGD annotations or by Meyer et al.<sup>7</sup> respectively, or 0 otherwise.

| strand | chrom   | 5'ss    | bp      | reads_at_dist_to_bp | bp_seq       | anno_5'ss | anno_bp |
|--------|---------|---------|---------|---------------------|--------------|-----------|---------|
| -      | chrII   | 47146   | 47074   | 2,0,2               | GTTACTAATATG | 1         | 1       |
| +      | chrII   | 125155  | 125231  | 49                  | ATTACTAACATT | 1         | 1       |
| +      | chrII   | 170677  | 170768  | 0,11                | AGTACTAACGTT | 1         | 1       |
| -      | chrIII  | 178213  | 177956  | 1,6                 | GATACTAACAAC | 1         | 1       |
| +      | chrIV   | 122078  | 122159  | 19                  | CGTACTAACAAC | 1         | 0       |
| -      | chrIV   | 215384  | 215274  | 19                  | TTTACTAACGAG | 0         | 0       |
| +      | chrIV   | 230020  | 230262  | 122,12,5            | TTTACTAACAAA | 1         | 1       |
| -      | chrIV   | 239509  | 239421  | 4,9,353             | AATACTAACAAT | 1         | 1       |
| +      | chrIV   | 331189  | 331277  | 23                  | ATCACTAACCTG | 0         | 0       |
| +      | chrIV   | 399362  | 399470  | 100,5,0,0,0,0,3     | AATACTAACCAT | 1         | 1       |
| -      | chrIV   | 715358  | 715267  | 109                 | TATACTAACAAA | 1         | 1       |
| -      | chrIX   | 99385   | 99153   | 1,6,33              | AATACTAACAAA | 1         | 1       |
| +      | chrIX   | 225875  | 225994  | 2                   | TTTACTAATATT | 0         | 0       |
| +      | chrIX   | 317018  | 317138  | 5                   | TTTACTAACAGG | 0         | 1       |
| -      | chrIX   | 348494  | 348383  | 1,16                | TTTACTAACTAT | 1         | 1       |
| -      | chrV    | 166874  | 166787  | 4                   | ATTACTAACATC | 1         | 1       |
| -      | chrV    | 248671  | 248563  | 2                   | CATTCTAACATT | 0         | 0       |
| +      | chrV    | 362733  | 362835  | 2                   | AATTCTAACGCA | 1         | 0       |
| -      | chrV    | 505180  | 505049  | 0,0,2               | AGTACTAACCAG | 0         | 0       |
| -      | chrVI   | 221414  | 221303  | 30,0,0,0,0,0,0,0,8  | TATACTAACAGA | 1         | 1       |
| -      | chrVII  | 73137   | 73035   | 10                  | ATTACTAACAAG | 1         | 1       |
| +      | chrVII  | 249887  | 250015  | 35                  | GTTACTAACAGG | 1         | 1       |
| -      | chrVII  | 497458  | 497390  | 0,0,5               | CTTACTAACTGT | 1         | 1       |
| -      | chrVII  | 1061028 | 1060825 | 10                  | GATACTAACTTT | 0         | 0       |
| +      | chrVII  | 1084883 | 1085006 | 14                  | CTTACTAACTGA | 1         | 1       |
| +      | chrVIII | 129529  | 129617  | 2                   | AATACTAACATA | 1         | 1       |
| -      | chrVIII | 138408  | 138281  | 5,65                | TGTACTAACAAC | 1         | 1       |
| +      | chrVIII | 251156  | 251231  | 0,1                 | GAGACTAACTTT | 1         | 1       |
| -      | chrVIII | 505516  | 505289  | 15                  | TTTACTAACAAG | 1         | 1       |
| +      | chrX    | 73797   | 74179   | 2                   | TTTACTAACAAC | 1         | 1       |
| +      | chrX    | 236903  | 237010  | 3                   | ATCACTGACATA | 0         | 0       |
| +      | chrX    | 435228  | 435309  | 2                   | ATTACTAACTAA | 1         | 1       |
| +      | chrX    | 608307  | 608548  | 32,3,3              | TTTACTAACAAA | 1         | 1       |

|   |         |        |        |                            |               |   |   |
|---|---------|--------|--------|----------------------------|---------------|---|---|
| - | chrX    | 703054 | 702881 | 5                          | TTTACTAACGAG  | 1 | 1 |
| - | chrXI   | 355283 | 355153 | 0,4                        | CATACTTACAGT  | 0 | 0 |
| - | chrXI   | 430596 | 430520 | 3,5                        | GCTACTAACTAT  | 1 | 1 |
| - | chrXII  | 327399 | 327294 | 5                          | TAGACTAACGTT  | 1 | 1 |
| + | chrXII  | 382301 | 382388 | 6                          | TTTACTTACTAG  | 0 | 0 |
| - | chrXII  | 707892 | 707769 | 0,0,2                      | CGTACTGACATT  | 0 | 0 |
| - | chrXIII | 23658  | 23500  | 3,30                       | TTTACTAACAGT  | 1 | 1 |
| + | chrXIII | 236592 | 236788 | 72,2,1                     | GCCACTAACAAAT | 1 | 1 |
| - | chrXIII | 243056 | 242969 | 0,0,4                      | AATACTGACAAT  | 0 | 0 |
| + | chrXIII | 424998 | 425114 | 255,10,6                   | TTTACTAACAAA  | 1 | 1 |
| - | chrXIII | 500151 | 499899 | 2,42                       | CTTACTAACAAA  | 1 | 1 |
| - | chrXIII | 721345 | 721232 | 313                        | AATACTAACAGC  | 1 | 1 |
| + | chrXIV  | 48294  | 48378  | 10,0,3                     | ATTACTAACAAAT | 1 | 1 |
| - | chrXIV  | 237531 | 237419 | 0,0,9                      | TTTACTGACCTA  | 0 | 0 |
| - | chrXIV  | 380781 | 380701 | 11                         | ATTACTAATCTG  | 1 | 0 |
| + | chrXIV  | 502164 | 502269 | 0,0,10                     | GATACTGACTAT  | 0 | 0 |
| + | chrXIV  | 616067 | 616229 | 4,0,4                      | TCAACTTACTGT  | 0 | 0 |
| - | chrXV   | 552874 | 552738 | 27,23,51                   | ATTACTAACTGG  | 1 | 1 |
| + | chrXV   | 780121 | 780265 | 604,27,100                 | TTGACTAACACA  | 1 | 1 |
| - | chrXVI  | 76223  | 76014  | 6                          | GTTACTAACATA  | 1 | 1 |
| - | chrXVI  | 281503 | 281386 | 18                         | TTGACTAACACA  | 1 | 1 |
| - | chrXVI  | 582701 | 582570 | 76,0,0,0,0,0,0,0,0,0,10,59 | TATACTAACAAA  | 1 | 1 |
| + | chrXVI  | 623578 | 623665 | 481,39,30                  | TATACTAACAAAG | 1 | 1 |
| + | chrXVI  | 833694 | 833783 | 18                         | AAAATAACAAT   | 1 | 1 |
| + | chrXVI  | 943051 | 943174 | 6,0,1,0,5                  | CTTACTAACTGA  | 1 | 1 |
